# Supplementary material for: Medroxyprogesterone acetate plus metformin for fertility-sparing treatment of atypical endometrial hyperplasia and endometrial carcinoma: trial protocol for a prospective, randomised, open, blinded-endpoint design, dose-response trial (FELICIA trial)
Source: PubMed Central journal article supplement — BMJ Open. 2020 Feb 28;10(2):e035416. doi: 10.1136/bmjopen-2019-035416 (PMC7050341; doi:10.1136/bmjopen-2019-035416), 2020-02-28
Supplement: bmjopen-2019-035416.draft_revisions.pdf [file bmjopen-2019-035416.draft_revisions.pdf]

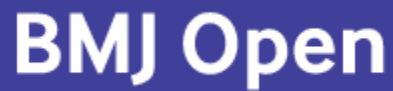

BMJ Open is committed to open peer review. As part of this commitment we make the peer review history of every article we publish publicly available.

When an article is published we post the peer reviewers' comments and the authors' responses online. We also post the versions of the paper that were used during peer review. These are the versions that the peer review comments apply to.

The versions of the paper that follow are the versions that were submitted during the peer review process. They are not the versions of record or the final published versions. They should not be cited or distributed as the published version of this manuscript.

BMJ Open is an open access journal and the full, final, typeset and author-corrected version of record of the manuscript is available on our site with no access controls, subscription charges or pay-per-view fees (<http://bmjopen.bmj.com>).

If you have any questions on BMJ Open's open peer review process please email [info.bmjopen@bmj.com](mailto:info.bmjopen@bmj.com)

# BMJ Open

## **Medroxyprogesterone acetate plus metformin for fertility-sparing treatment of atypical endometrial hyperplasia and endometrial carcinoma: a prospective, randomized, open, blinded-endpoint design, dose response trial (FELICIA Trial)**

|                               |                                                                                                                                                                                                                                                                                                                                                                     |
|-------------------------------|---------------------------------------------------------------------------------------------------------------------------------------------------------------------------------------------------------------------------------------------------------------------------------------------------------------------------------------------------------------------|
| Journal:                      | <i>BMJ Open</i>                                                                                                                                                                                                                                                                                                                                                     |
| Manuscript ID                 | bmjopen-2019-035416                                                                                                                                                                                                                                                                                                                                                 |
| Article Type:                 | Protocol                                                                                                                                                                                                                                                                                                                                                            |
| Date Submitted by the Author: | 30-Oct-2019                                                                                                                                                                                                                                                                                                                                                         |
| Complete List of Authors:     | Mitsunashi, Akira; Chiba University Graduate School of Medicine School of Medicine Department of Reproductive Medicine<br>Kawasaki, Yohei; Chiba University,<br>Hori, Makoto<br>Fujiwara, Tadami<br>Hanaoka, Hideki; Chiba University Hospital<br>Shozu, Makio; Chiba University Graduate School of Medicine School of Medicine Department of Reproductive Medicine |
| Keywords:                     | Gynaecological oncology < GYNAECOLOGY, Adult oncology < ONCOLOGY, Gynaecological oncology < ONCOLOGY                                                                                                                                                                                                                                                                |
|                               |                                                                                                                                                                                                                                                                                                                                                                     |

SCHOLARONE™  
Manuscripts

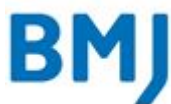

I, the Submitting Author has the right to grant and does grant on behalf of all authors of the Work (as defined in the below author licence), an exclusive licence and/or a non-exclusive licence for contributions from authors who are: i) UK Crown employees; ii) where BMJ has agreed a CC-BY licence shall apply, and/or iii) in accordance with the terms applicable for US Federal Government officers or employees acting as part of their official duties; on a worldwide, perpetual, irrevocable, royalty-free basis to BMJ Publishing Group Ltd ("BMJ") its licensees and where the relevant Journal is co-owned by BMJ to the co-owners of the Journal, to publish the Work in this journal and any other BMJ products and to exploit all rights, as set out in our [licence](#).

The Submitting Author accepts and understands that any supply made under these terms is made by BMJ to the Submitting Author unless you are acting as an employee on behalf of your employer or a postgraduate student of an affiliated institution which is paying any applicable article publishing charge ("APC") for Open Access articles. Where the Submitting Author wishes to make the Work available on an Open Access basis (and intends to pay the relevant APC), the terms of reuse of such Open Access shall be governed by a Creative Commons licence – details of these licences and which [Creative Commons](#) licence will apply to this Work are set out in our licence referred to above.

Other than as permitted in any relevant BMJ Author's Self Archiving Policies, I confirm this Work has not been accepted for publication elsewhere, is not being considered for publication elsewhere and does not duplicate material already published. I confirm all authors consent to publication of this Work and authorise the granting of this licence.

## Protocol

# **Medroxyprogesterone acetate plus metformin for fertility-sparing treatment of atypical endometrial hyperplasia and endometrial carcinoma: a prospective, randomized, open, blinded-endpoint design, dose response trial (FELICIA Trial)**

Running head: Dose response trial for metformin + MPA

Authors: Akira Mitsuhashi<sup>1)</sup>, Yohei Kawasaki<sup>2)</sup>, Makoto Hori<sup>3)</sup>, Tadami Fujiwara<sup>3)</sup>, Hideki Hanaoka<sup>3)</sup>, Makio Shozu<sup>1)</sup>.

Institutional affiliations:

1) Department of Reproductive Medicine, Graduate School of Medicine, Chiba University, 1-8-1 Inohana, Chuo-ku, Chiba 260-8670, Japan

2) Biostatistics Section, Clinical Research Center, Chiba University Hospital, 1-8-1 Inohana, Chuo-ku, Chiba 260-8677, Japan

3) Clinical Research Center, Chiba University Hospital, 1-8-1 Inohana, Chuo-ku, Chiba 260-8677, Japan

Corresponding author: Akira Mitsuhashi. Department of Reproductive Medicine, Graduate

School of Medicine, Chiba University, 1-8-1 Inohana Chuo-ku, Chiba 260-8670, Japan

Tel: +81-43-226-2121; Fax: +81-43-226-2122; E-mail: antira@faculty.chiba-u.jp

**Word count 3054**

**Abstract**

**Introduction:** Progestin therapy is the only fertility sparing treatment option for patients with atypical endometrial hyperplasia (AEH) and endometrial cancer (EC). However, the results of three meta-analyses revealed a high remission rate, as well as an association with a high rate of relapse. We previously conducted a phase II of medroxyprogesterone acetate (MPA) plus metformin as a fertility-sparing treatment for AEH and EC patients, and reported that metformin inhibited disease relapse after remission.

**Methods and analysis:** A randomized open blinded-endpoint design phase IIb dose response trial was planned to commence in July 2019. The trial aims to identify the appropriate dose of metformin to be combined with medroxyprogesterone acetate therapy for fertility-sparing treatment of patients with AEH and EC. The primary endpoint of the trial is the three-year relapse-free survival (RFS) rate. The secondary endpoints are RFS rate, the overall rate of response to medroxyprogesterone acetate therapy, the conception rate after treatment, the outcome of pregnancy, toxicity evaluation, and changes in insulin resistance and body mass index. A total of 120 patients will be enrolled from 15 Japanese institutions within a 2.5-year

period and followed up for at least 3 years.

**Ethics and dissemination:** The protocol was approved by the institutional Review Board at Chiba University Hospital. The trial will be conducted according to the principles of the World Medical Association Declaration of Helsinki and in accordance with GCP standards. The trial findings will be published in a peer-reviewed journal.

**Trial registration number:** jRCT2031190065

### **Strengths and limitations of this trial**

- 1) The trial has been designed to meet the criteria for a high quality randomized trial.
- 2) The primary endpoint is the three-year relapse-free survival rate.
- 3) This trial will evaluate the long term efficacy of metformin as secondary endpoint.
- 4) A limitation of this trial is that it is not a confirmatory trial.
- 5) Other limitations of the trial include potential biases associated with the open-label design.

**Keywords:** metformin, medroxyprogesterone acetate, fertility sparing treatment, atypical endometrial hyperplasia, endometrial cancer

1  
2  
3  
4  
5  
6  
7  
8  
9  
10  
11  
12  
13  
14  
15  
16  
17  
18  
19  
20  
21  
22  
23  
24  
25  
26  
27  
28  
29  
30  
31  
32  
33  
34  
35  
36  
37  
38  
39  
40  
41  
42  
43  
44  
45  
46  
47  
48  
49  
50  
51  
52  
53  
54  
55  
56  
57  
58  
59  
60

**INTRODUCTION**

Progestin therapy is the only fertility sparing treatment option for patients with atypical endometrial hyperplasia (AEH) and endometrial cancer (EC). The guidelines of the National Comprehensive Cancer Network and the European Society of Gynecological Oncology Task Force regarding fertility-sparing treatment recommend progestin therapy for patients with AEH and EC who wish to conceive.[1, 2] However, the results of three meta-analyses revealed a high remission rate, as well as an association with a high rate of relapse.[3-5]

EC is often associated with obesity and/or diabetes mellitus, indicating that insulin resistance is a risk factor for EC.[6-8] We previously reported the incidence of obesity, insulin resistance, and abnormal glucose metabolism among young EC patients as 84%, 83%, and 78%, respectively.[9] Hyperinsulinemia due to insulin resistance plays an important role in carcinogenesis.[10] Epidemiological and basic research studies support this notion; thus, insulin resistance may be a promising target for the treatment and prevention of EC.[10, 11] Metformin is a biguanide that is widely used for the treatment of type 2 diabetes mellitus. Several recent epidemiological studies have revealed that metformin reduces the incidence of cancer and cancer-related mortality in diabetes patients.[12, 13]

Moreover, metformin inhibited the growth of breast, ovarian, endometrial, and prostate cancer cells, probably through the suppression of MAPK, cyclin D1, and mammalian target of rapamycin activity.[14, 15] Furthermore, metformin enhanced ovulation in patients

with polycystic ovary syndrome and improved pregnancy rates.[16, 17]

Based on this information, we previously conducted a phase II study of medroxyprogesterone acetate (MPA) plus metformin as a fertility-sparing treatment for AEH and EC patients and reported that metformin had inhibited disease relapse after remission. Additionally, metformin prevented weight gain caused by MPA and had improved insulin resistance among the registered patients.[18]

Therefore, we conducted a dose response randomized phase II study of MPA plus metformin for fertility-sparing treatment of AEH and EC. The trial protocol was approved by the Pharmaceuticals and Medical Devices Agency, Japan in June 2019 and the trial was initiated in July 2019. Approval was obtained from the institutional review board prior to patient recruitment at each institution. This trial was registered at the Japan Registry of Clinical Trials under trial no. jRCT2031190065 (<https://jrct.niph.go.jp>).

## METHODS AND ANALYSIS

### Objectives

The purpose of this trial is to verify the appropriate dose of metformin in a new fertility-sparing treatment involving a combination of metformin and MPA among patients with AEH and EC. Further, this trial aims to investigate the long-term efficacy and safety of this combination therapy.

1  
2  
3  
4  
5  
6  
7  
8  
9  
10  
11  
12  
13  
14  
15  
16  
17  
18  
19  
20  
21  
22  
23  
24  
25  
26  
27  
28  
29  
30  
31  
32  
33  
34  
35  
36  
37  
38  
39  
40  
41  
42  
43  
44  
45  
46  
47  
48  
49  
50  
51  
52  
53  
54  
55  
56  
57  
58  
59  
60

**Design of the trial**

This trial is a prospective, randomized, open, blinded-endpoint design, dose-response trial.

The trial is being conducted in 15 institutions across Japan. A list of recruiting sites is provided in online supplementary appendix A. A local principal investigator (PI), supported by at least two other staff members (such as a research nurse or clinical research coordinator), conducts the study at each participating site.

**Endpoints**

The primary endpoint of the trial is the three-year relapse-free survival (RFS) rate, which indicates the achievement of remission without recurrence 3 years from the date of trial entry for all subjects.

The secondary endpoints are RFS rate, the overall response rate to MPA therapy, conception rate following treatment, the outcome of pregnancy, results of toxicity assessment, and changes in insulin resistance and body mass index (BMI). The RFS period was defined as the period from the date of trial entry to the time of recurrence after remission or to the time of exclusion from the trial due to non-remission. Cases of non-remission are defined as those that experience disease progression before 32 weeks and those that do not achieve remission by 32 weeks. The conception rate was defined as the rate of successful pregnancies among

patients who were in remission and tried to have a child.

### Eligibility criteria

All patients underwent a 75 g oral glucose tolerance test before registration for the evaluation of glucose intolerance and insulin resistance

### Inclusion criteria

1. Histologically confirmed AEH or well-differentiated endometrioid adenocarcinoma, presumed to be International Federation of Gynecology and Obstetrics stage IA, and in which the EC was limited to the endometrium. Endometrial tissue sampling for diagnosis was performed by dilatation and curettage.
2. No prior treatment with a high dose of progestin, the levonorgestrel-releasing intrauterine system, or chemotherapy for an endometrial lesion (the uses of low or medium doses of a progestin for menstrual cycle regulation were permitted).
3. Over 20 years of age and under 42 years of age
4. Eastern Cooperative Oncology Group Performance Status 0
5. Fulfillment of each of the following parameters
  - 5.1. Leucocyte count  $\geq 3,000/\text{mm}^3$
  - 5.2. Platelet count  $\geq 10 \times 10^4/\text{mm}^3$

- 5.3. Aspartate aminotransferase (glutamic-oxaloacetic transaminase) level less than twice the maximum institutional standard
- 5.4. Alanine aminotransferase (glutamic-pyruvic transaminase) level less than twice the maximum institutional standard
- 5.5. Serum creatinine concentration  $\leq 1.0$  mg/dl
- 5.6. Creatinine clearance  $\leq 60$  L /min
- 5.7. Total bilirubin level  $\leq 1.5$  mg/dl
- 5.8. D-dimer level  $< 1.5$   $\mu$ g/ml
- 6. No prior medical history of chemical sensitivity to any of the chemicals being used in the trial (MPA and metformin)
- 7. No clinical problem on electrocardiography
- 8. The patient provided written informed consent

**Exclusion criteria**

- 1. Contraindication to the drugs used in this trial (MPA and metformin)
  - 1.1. Susceptible to lactic acidosis
    - 1.1.1. A history of lactic acidosis
    - 1.1.2. Moderate to severe kidney damage or dialysis
    - 1.1.3. Severe liver damage

- 1.1.4. Shock, cardiac arrest, cardiac infarction, thrombosis of the lung, or severe cardiovascular and/or lung damage
- 1.1.5. Ingestion of excessive amounts of alcohol
- 1.1.6. Gastrointestinal damage such as dehydration or diarrhea and/or vomiting that could cause dehydration
- 1.2. Serious ketosis, diabetic coma or pre-coma, or type I diabetes
- 1.3. Serious infections and/or injuries, a medical history including recent surgery, or the expectation that the patient will soon undergo surgery
- 1.4. Malnourishment or starvation, hyposthenia, or pituitary and/or adrenal gland disorders
- 1.5. Pregnancy or the expectation that the woman could be pregnant
- 1.6. Prior medical history of chemical sensitivity to biguanides or the compounds present in the drugs being tested
- 1.7. High risk of thrombosis
  - 1.7.1. Surgery within the past week
  - 1.7.2. Cerebral and/or cardiac infarction, thrombophlebitis, or a prior history thereof
  - 1.7.3. Valvular heart disease, atrial fibrillation, endocarditis, or other serious cardiac conditions
  - 1.7.4. The current administration of hormone treatments

- 1.8. Undiagnosed breast lesions or vaginal and/or urinary bleeding
- 1.9. Serious liver damage
- 1.10. Hypocalcemia
- 2. Psychosis or mental symptoms that could make it difficult for patients to participate in the trial
- 3. Uncontrolled diabetes mellitus
- 4. Diabetic patients who already take biguanides, including metformin (patients who manage their diabetes via diet and exercise therapy, or those who take medicines apart from metformin are eligible).
- 5. Concomitant malignancies
- 6. Systemic administration of steroids
- 7. Determined to be ineligible by the physician in charge for any other reason

**Randomization**

After confirming the fulfillment of the eligibility criteria, patients are registered via a web-based system (DATATRAK ONE; <https://secure.datatrak.net>). Patients are randomized to either arm A (MPA alone) or arm B (MPA + metformin 750 mg/day group) or arm C (MPA + metformin 1500 mg/day group). BMI, histological diagnosis, and marital status are considered as adjustment factors in dynamic allocation.

## Treatment methods

The patients are randomized into 3 treatment arms (Fig. 1). The protocol treatment was halted if MPA therapy did not result in remission, according to the following criteria: the absence of any hormonal effect by 16 weeks; disease progression at 8, 16, and 24 weeks; or no remission at 32 weeks. A combination of 100 mg of aspirin was permissible if patients received MPA.

Arm A (control) MPA alone group: Patients receive a daily oral dose of 600 mg of MPA for 32 weeks.

Arm B (experimental) MPA + metformin 750 mg/day group: Patients receive a daily oral dose of 600 mg of MPA for 32 weeks.

Patients simultaneously receive a daily dose of metformin (initial dose, 500 mg/day; increased monthly up to 750 mg/day if no adverse effects have developed) in combination with MPA from the initial point of treatment.

After MPA administration, metformin therapy is continued until conception or disease recurrence.

Arm C (experimental): MPA + metformin 1500 mg/day group:

1  
2  
3  
4  
5  
6  
7  
8  
9  
10  
11  
12  
13  
14  
15  
16  
17  
18  
19  
20  
21  
22  
23  
24  
25  
26  
27  
28  
29  
30  
31  
32  
33  
34  
35  
36  
37  
38  
39  
40  
41  
42  
43  
44  
45  
46  
47  
48  
49  
50  
51  
52  
53  
54  
55  
56  
57  
58  
59  
60

Patients receive a daily oral dose of 600 mg of MPA for 32 weeks.

Patients simultaneously receive a daily dose of metformin (initial dose, 500 mg/day; increased monthly up to 1500 mg/day if no adverse effects have developed) in combination with MPA from the initial point of treatment.

After MPA administration, metformin therapy is continued until conception or disease recurrence.

**Maintenance period**

After completing the MPA treatment, only patients who achieved remission will enter the maintenance period. Patients are examined every three months until three years after the initial treatment (at the time of evaluation for the primary endpoint). After that, patients are examined every six months. If a patient desires to conceive in the immediate future, they are allowed to become pregnant immediately after achieving remission. Fertility treatment is recommended. A low dose of estrogen-progestin or medium doses of progestin is recommended for patients who do not desire to conceive, to control the menstrual cycle until they wish to conceive.

**Criteria for discontinuation of trial treatment**

The defined criteria for the discontinuation of trial medication are as follows:

1. The protocol treatment was halted if MPA therapy did not result in remission, according to the following criteria: the absence of any hormonal effect by 16 weeks; disease progression at 8, 16, and 24 weeks; or no remission at 32 weeks.
2. If the patients relapse after remission
3. Severe adverse effects (progressive or persistent) which in the opinion of the PI may be related to the study medication
4. Other situations, judged by the PI, in which MPA or metformin cannot be continued

#### **Data management, monitoring, safety and auditing**

Monitors will ensure that the investigational team is complying with the study protocol and GCP standards, that the data and AEs are accurately and appropriately recorded in the eCRFs, that severe AEs (SAEs) are reported to the trial coordinator and the investigational drug provider, and that those meeting the SAE reporting criteria are reported to the institutional review board (IRB). AEs will be classified in accordance with the Medical Dictionary for Regulatory Activities, Japanese translation MedDRA/J V.22.0 (MedDRA Japanese Maintenance Organization, Tokyo, Japan). All participants with AEs are to be followed up during the course of the AE until their resolution, or for 4 weeks after the end of the trial. All SAEs will be reported to all investigators, discussed through a web-based AE reporting system, and will be reported to the PMDA, if necessary.

1  
2  
3  
4  
5  
6  
7  
8  
9  
10  
11  
12  
13  
14  
15  
16  
17  
18  
19  
20  
21  
22  
23  
24  
25  
26  
27  
28  
29  
30  
31  
32  
33  
34  
35  
36  
37  
38  
39  
40  
41  
42  
43  
44  
45  
46  
47  
48  
49  
50  
51  
52  
53  
54  
55  
56  
57  
58  
59  
60

**Data monitoring committee**

The data monitoring committee comprises three clinical trial specialists, including a biostatistician, are were not associated with the current study. The committee will meet at least twice a year and all the data obtained from the current trial will be checked by the committee.

**Statistical analysis**

Primary endpoints

An analysis of the effectiveness of primary endpoints will be conducted on the full analysis set. The following closed testing procedure will be used to assess the three groups: MPA-alone group as the control group, the group with MPA plus metformin (750 mg), and the group with MPA plus metformin (1500 mg).

1. The MPA-alone, MPA plus metformin (750 mg), and MPA plus metformin (1500 mg) groups will be pooled and analyzed via a log-rank test. If the difference is significant, move to the next step; if not, terminate the procedure.
2. For the MPA-alone and the MPA plus metformin (1500 mg) groups, a log-rank test will be performed. If the difference is significant, move to the next step; if not, terminate the procedure.

3. For the MPA-alone and MPA plus metformin (750 mg) groups, a log-rank test will be performed. If the difference is significant, move to the next step; if not, terminate the procedure.
4. For the MPA plus metformin (750 mg) and MPA plus metformin (1500 mg) groups, a log-rank test will be performed.

### Secondary endpoints

The same analysis performed on primary endpoints will be applied to the per protocol set. In addition, an analysis based on the Cox proportional hazards model will be carried out by adjusting for necessary allocation factors and layers.

Other items to be evaluated are the complete response rate for the MPA treatment period; the rate of trial continuation for the MPA-alone and MPA plus metformin groups; the recurrence-free survival time and recurrence-free rate in each year for the maintenance period; BMI values and homeostatic model assessment of insulin resistance results of all response cases that expressed the desire to become pregnant; the proportion of patients that became pregnant at least once during the trial period; outcomes of pregnant patients (miscarriage, stillbirth, live birth, weeks of gestation), and of all response cases that expressed the desire to become pregnant; and the proportion of patients that gave birth to a child.

1  
2  
3  
4  
5  
6  
7  
8  
9  
10  
11  
12  
13  
14  
15  
16  
17  
18  
19  
20  
21  
22  
23  
24  
25  
26  
27  
28  
29  
30  
31  
32  
33  
34  
35  
36  
37  
38  
39  
40  
41  
42  
43  
44  
45  
46  
47  
48  
49  
50  
51  
52  
53  
54  
55  
56  
57  
58  
59  
60

**Safety endpoints**

In the analysis of secondary safety endpoints, the number and rate of adverse events in an adverse event rate safety analysis set will be evaluated. Particularly, we will evaluate items in which a grade 3 or greater adverse event will occur (grade 2 or greater in the case of neurotoxicity).

**Target number of cases and the grounds for setting it**

Based on previous studies, the non-recurrence rate for the MPA-alone group was assumed to be 60% and the non-recurrence rate for the MPA plus metformin group 85%. The same setting was applied for both groups for the following items: the response rate during the MPA treatment period was 80%, the probability of withdrawal during the maintenance period was 5%, the probability of pregnancy was 10%, patients for whom the trial was terminate during pregnancy were treated as non-recurrence-in-trial cases, the two-tailed significance level was 5%, and the power was 80%.

Based on these configurations, the number of cases was calculated through simulation. As a result, the necessary number of cases per group is 40, and 120 in total.

**Interim analysis and monitoring**

No interim analysis is planned.

## ETHICS AND DISSEMINATION

The trial will be conducted in accordance with the Ordinance on the Standards for the Implementation of Clinical Trials (GCP Ordinance) and the principles of the World Medical Association (WMA) Declaration of Helsinki. All participants will receive adequate information about the nature, purpose, possible risk and benefits of the trial, and about alternative therapeutic choices, using an informed consent form approved by the IRB. The informed consent form, signed by the participant, is required for enrolment in the trial. We intend to publish results of the FELICA trial in a major journal.

## DISCUSSION

This trial was planned to determine the appropriate dose of metformin in a new fertility-sparing treatment involving a combination of metformin and MPA among patients with AEH and EC. To confirm the appropriate dose of metformin, the RFS rate was set as the primary endpoint.

In Japan, pharmaceutical approval for the dose of metformin was for a maximum of 2250 mg per day and only for patients with diabetes mellitus. The recommended maintenance dose of metformin was 750 to 1500 mg per day. In a previous phase 2 trial,

1  
2  
3  
4  
5  
6  
7  
8  
9  
10  
11  
12  
13  
14  
15  
16  
17  
18  
19  
20  
21  
22  
23  
24  
25  
26  
27  
28  
29  
30  
31  
32  
33  
34  
35  
36  
37  
38  
39  
40  
41  
42  
43  
44  
45  
46  
47  
48  
49  
50  
51  
52  
53  
54  
55  
56  
57  
58  
59  
60

metformin (initial dose, 750 mg/day; increased weekly in increments of 750 mg/day up to 2,250 mg/day if no adverse effects occurred) was administered concurrently with MPA since initiation of treatment.[18] Although the dose was reduced to under 1500 mg per day in some patients, no difference was found in treatment efficacy between the 1500 mg and 2250 mg groups (unpublished data). To consider long term feasibility, we set the maximum dose of this trial as 1500 mg per day. This protocol was agreed upon with regulatory strategy consultation of the Pharmaceuticals and Medical Devices Agency.

Most studies of fertility sparing treatments, including our previous phase 2 trial, have only evaluated relapse rates in remission patients.[3,4] An evaluation of the efficacy of metformin depends on both the response rate and recurrence rate; however, even if remission rates are low, if response rates are also low it may not necessarily mean that metformin is effective.

Therefore, we defined the three-year RFS rate as the primary endpoint of this trial. This means the achievement of remission without recurrence 3 years from the date of trial enrolment.

This trial has some strengths. First, we are able to evaluate the long-term efficacy of metformin because the primary endpoint of this trial is the 3-year RFS rate. Following the first phase 2 trial of metformin combined with progestin for fertility-sparing treatment of AEH and EC started in 2009 and reported on in 2016, there are five trials currently

examining the effect of metformin in fertility-sparing treatment for AEH and EC (NCT02035787, NCT03538704, NCT01968317, NCT02990728, NCT01686126). In these studies, the primary endpoint is set as the pathological response rate. However, only one phase 2 trial has reported on relapse rate as a secondary endpoint. Second, further evidence of the long-term efficacy of metformin will be based on continued metformin therapy following the conclusion of MPA administration, until conception or disease recurrence. Based on our previous phase 2 trial results, we hypothesized that metformin might prevent recurrence after remission. Metformin had indirect effects that were caused by the lowering of glucose and insulin levels, as described above. However, in ongoing trials, metformin is administered combined with progestin and is discontinued following remission. In these trials, only an anticancer effect of metformin was expected as an outcome. Finally, this trial will evaluate metabolic status. Most of the candidate patients for this trial were obese, consistent with insulin resistance and abnormal glucose metabolism. Based on our previous phase 2 trial, we will evaluate improvements in the metabolic profiles of these patients that are anticipated with the addition of metformin.

A limitation of this trial its design is not that of a confirmatory trial. In addition, this trial will not use a placebo control group. However, evaluation of the remission and relapse rates, which are associated with the primary endpoint, will be performed by a pathological review board. The evaluation will occur under blind and independent conditions. Therefore,

we believe that it will be possible to maintain objectivity and to reduce potential bias.

This trial is expected to clarify the clinical advantages of the combination of metformin with progestin. If this trial reveals the appropriate dose of metformin and shows long-term efficacy, clinical use of metformin for fertility sparing treatment of EC will be advanced.

**Acknowledgements:** We would like to thank all the staff and patients involved with the study at the 15 research sites, and the Trial Steering Committee and Central Pathology Committee and Data Monitoring Committee for their ongoing support throughout the trial. We would like to acknowledge the role of the Clinical Research Centre, Chiba University Hospital in supporting the ongoing delivery of the trial at the sites.

**Contributors:** All authors made a significant contribution to the conception and design of the trial protocol. AM made major contributions to the design of this trial, development of the original trial protocol, and drafting of the initial manuscript. YK developed the statistical analysis plan. All authors read and approved the final protocol.

**Funding:** This research is supported by the Japan Agency for Medical Research and Development under grant number JP19lk0201099.

**Competing interests:** The authors have declared no conflicts of interest.

**Patients consent:** Obtained

**Ethics approval:** The Institutional Review Board (IRB) of each institution have approved the trial.

## REFERENCES

1. National Comprehensive Cancer Network [Internet]. Uterine Neoplasms: NCCN Clinical Practice Guidelines in Oncology (NCCN Guidelines®) [cited 2019 Feb 11]. [https://www.nccn.org/professionals/physician\\_gls/pdf/uterine.pdf](https://www.nccn.org/professionals/physician_gls/pdf/uterine.pdf).
2. Rodolakis A, Biliatis I, Morice P, et al. European Society of Gynecological Oncology Task Force for Fertility Preservation: Clinical Recommendations for Fertility-Sparing Management in Young Endometrial Cancer Patients. *Int J Gynecol Cancer* 2015;25:1258–65.
3. Gunderson CC, Fader AN, Carson KA, Bristow RE. Oncologic and reproductive outcomes with progestin therapy in women with endometrial hyperplasia and grade 1 adenocarcinoma: a systematic review. *Gynecol Oncol* 2012;125:477–82.
4. Gallos ID, Yap J, Rajkhowa M, Luesley DM, Coomarasamy A, Gupta JK. Regression, relapse, and live birth rates with fertility-sparing therapy for endometrial cancer and atypical complex endometrial hyperplasia: a systematic review and meta-analysis. *Am J*

- Obstet Gynecol* 2012;207:266.e1–12.
5. Wei J, Zhang W, Feng L, Gao W. Comparison of fertility-sparing treatments in patients with early endometrial cancer and atypical complex hyperplasia: A meta-analysis and systematic review. *Medicine (Baltimore)* 2017;96:e8034.
  6. Calle EE, Kaaks R. Overweight, obesity and cancer: epidemiological evidence and proposed mechanisms. *Nat Rev Cancer* 2004;4:579–91.
  7. Renehan AG, Tyson M, Egger M, Heller RF, Zwahlen M. Body-mass index and incidence of cancer: a systematic review and meta-analysis of prospective observational studies. *Lancet* 2008;371:569–78.
  8. Bianchini F, Kaaks R, Vainio H. Overweight, obesity, and cancer risk. *Lancet Oncol* 2002;3:565–74.
  9. Mitsuhashi A, Uehara T, Hanawa S, Shozu M. Prospective evaluation of abnormal glucose metabolism and insulin resistance in patients with atypical endometrial hyperplasia and endometrial cancer. *Support Care Cancer* 2017;25:1495–501.
  10. Pollak M. The insulin and insulin-like growth factor receptor family in neoplasia: an update. *Nat Rev Cancer* 2012;12:159–69.
  11. Hernandez AV, Pasupuleti V, Benites-Zapata VA, Thota P, Deshpande A, Perez-Lopez FR. Insulin resistance and endometrial cancer risk: A systemic review and meta-analysis. *Eur J Cancer* 2015;51:2747–58.

12. Evans JM, Donnelly LA, Emslie-Smith AM, Alessi DR, Morris AD. Metformin and reduced risk of cancer in diabetic patients. *BMJ* 2005;330:1304–5.
13. Heckman-Stoddard BM, DeCensi A, Sahasrabudhe VV, Ford LG. Repurposing metformin for the prevention of cancer and cancer recurrence. *Diabetologia* 2017;60:1639–49.
14. Quinn BJ, Kitagawa H, Memmott RM, Gills JJ, Dennis PA. Repositioning metformin for cancer prevention and treatment. *Trends Endocrinol Metab* 2013;24:469–80.
15. Pernicova I, Korbonits M. Metformin--mode of action and clinical implications for diabetes and cancer. *Nat Rev Endocrinol* 2014;10:143–56.
16. Nestler JE. Metformin for the treatment of the polycystic ovary syndrome. *N Engl J Med* 2008;358:47–54.
17. Practice Committee of the American Society for Reproductive Medicine. Role of metformin for ovulation induction in infertile patients with polycystic ovary syndrome (PCOS): a guideline. *Fertil Steril* 2017;108:426–41.
18. Mitsuhashi A, Sato Y, Kiyokawa T, Koshizaka M, Hanaoka H, Shozu M. Phase II study of medroxyprogesterone acetate plus metformin as a fertility-sparing treatment for atypical endometrial hyperplasia and endometrial cancer. *Ann Oncol* 2016;27:262–6.

1  
2  
3  
4  
5  
6  
7  
8  
9  
10  
11  
12  
13  
14  
15  
16  
17  
18  
19  
20  
21  
22  
23  
24  
25  
26  
27  
28  
29  
30  
31  
32  
33  
34  
35  
36  
37  
38  
39  
40  
41  
42  
43  
44  
45  
46  
47  
48  
49  
50  
51  
52  
53  
54  
55  
56  
57  
58  
59  
60

**Figure legend**

Figure 1. Trial design. MPA, medroxyprogesterone acetate; pCR, pathological complete response

For peer review only

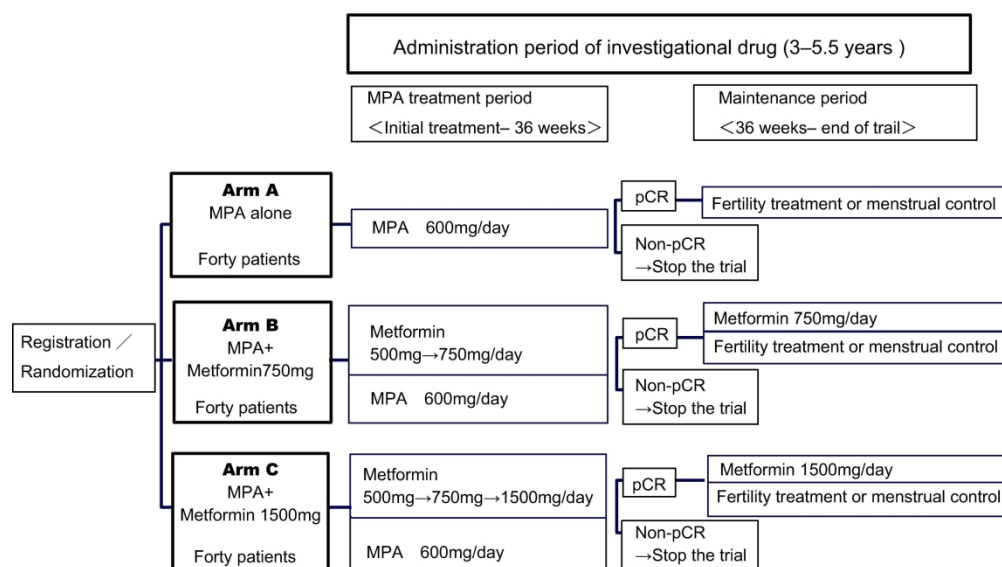

FIGURE 1

249x187mm (300 x 300 DPI)

**Participating Institutions (from north to south)**

Hokkaido University Hospital

Tohoku University Hospital

University of Tsukuba Hospital

Jichi Medical University Hospital

The Jikei University Hospital

Chiba University Hospital

Keio University Hospital

Tokai University Hospital

Kitasato University Hospital

Niigata University Medical & Dental Hospital

Shinshu University Hospital

Osaka Medical College Hospital

Gifu University Hospital

Kurume University Hospital

Kumamoto University Hospital

# Reporting checklist for protocol of a clinical trial.

Based on the SPIRIT guidelines.

## Instructions to authors

Complete this checklist by entering the page numbers from your manuscript where readers will find each of the items listed below.

Your article may not currently address all the items on the checklist. Please modify your text to include the missing information. If you are certain that an item does not apply, please write "n/a" and provide a short explanation.

Upload your completed checklist as an extra file when you submit to a journal.

In your methods section, say that you used the SPIRIT reporting guidelines, and cite them as:

Chan A-W, Tetzlaff JM, Altman DG, Laupacis A, Gøtzsche PC, Krleža-Jerić K, Hróbjartsson A, Mann H, Dickersin K, Berlin J, Doré C, Parulekar W, Summerskill W, Groves T, Schulz K, Sox H, Rockhold FW, Rennie D, Moher D. SPIRIT 2013 Statement: Defining standard protocol items for clinical trials. *Ann Intern Med.* 2013;158(3):200-207

|                                             |                     | Reporting Item                                                                                               | Page Number         |
|---------------------------------------------|---------------------|--------------------------------------------------------------------------------------------------------------|---------------------|
| <b>Administrative information</b>           |                     |                                                                                                              |                     |
| Title                                       | <a href="#">#1</a>  | Descriptive title identifying the study design, population, interventions, and, if applicable, trial acronym | 1                   |
| Trial registration                          | <a href="#">#2a</a> | Trial identifier and registry name. If not yet registered, name of intended registry                         | 4                   |
| Trial registration: data set                | <a href="#">#2b</a> | All items from the World Health Organization Trial Registration Data Set                                     | register to<br>jRCT |
| Protocol version                            | <a href="#">#3</a>  | Date and version identifier                                                                                  | n/a                 |
| Funding                                     | <a href="#">#4</a>  | Sources and types of financial, material, and other support                                                  | 20                  |
| Roles and responsibilities: contributorship | <a href="#">#5a</a> | Names, affiliations, and roles of protocol contributors                                                      | 1, 20               |

|    |                           |                     |                                                                   |     |
|----|---------------------------|---------------------|-------------------------------------------------------------------|-----|
| 1  | Roles and                 | <a href="#">#5b</a> | Name and contact information for the trial sponsor                | 20  |
| 2  | responsibilities:         |                     |                                                                   |     |
| 3  | sponsor contact           |                     |                                                                   |     |
| 4  | information               |                     |                                                                   |     |
| 5  |                           |                     |                                                                   |     |
| 6  |                           |                     |                                                                   |     |
| 7  |                           |                     |                                                                   |     |
| 8  | Roles and                 | <a href="#">#5c</a> | Role of study sponsor and funders, if any, in study design;       | 20  |
| 9  | responsibilities:         |                     | collection, management, analysis, and interpretation of data;     |     |
| 10 | sponsor and funder        |                     | writing of the report; and the decision to submit the report for  |     |
| 11 |                           |                     | publication, including whether they will have ultimate authority  |     |
| 12 |                           |                     | over any of these activities                                      |     |
| 13 |                           |                     |                                                                   |     |
| 14 |                           |                     |                                                                   |     |
| 15 |                           |                     |                                                                   |     |
| 16 | Roles and                 | <a href="#">#5d</a> | Composition, roles, and responsibilities of the coordinating      | 14  |
| 17 | responsibilities:         |                     | centre, steering committee, endpoint adjudication committee,      |     |
| 18 | committees                |                     | data management team, and other individuals or groups             |     |
| 19 |                           |                     | overseeing the trial, if applicable (see Item 21a for data        |     |
| 20 |                           |                     | monitoring committee)                                             |     |
| 21 |                           |                     |                                                                   |     |
| 22 |                           |                     |                                                                   |     |
| 23 |                           |                     |                                                                   |     |
| 24 | <b>Introduction</b>       |                     |                                                                   |     |
| 25 |                           |                     |                                                                   |     |
| 26 |                           |                     |                                                                   |     |
| 27 | Background and            | <a href="#">#6a</a> | Description of research question and justification for            | 4-5 |
| 28 | rationale                 |                     | undertaking the trial, including summary of relevant studies      |     |
| 29 |                           |                     | (published and unpublished) examining benefits and harms for      |     |
| 30 |                           |                     | each intervention                                                 |     |
| 31 |                           |                     |                                                                   |     |
| 32 |                           |                     |                                                                   |     |
| 33 |                           |                     |                                                                   |     |
| 34 | Background and            | <a href="#">#6b</a> | Explanation for choice of comparators                             | 4-5 |
| 35 | rationale: choice of      |                     |                                                                   |     |
| 36 | comparators               |                     |                                                                   |     |
| 37 |                           |                     |                                                                   |     |
| 38 |                           |                     |                                                                   |     |
| 39 | Objectives                | <a href="#">#7</a>  | Specific objectives or hypotheses                                 | 5   |
| 40 |                           |                     |                                                                   |     |
| 41 | Trial design              | <a href="#">#8</a>  | Description of trial design including type of trial (eg, parallel | 4-5 |
| 42 |                           |                     | group, crossover, factorial, single group), allocation ratio, and |     |
| 43 |                           |                     | framework (eg, superiority, equivalence, non-inferiority,         |     |
| 44 |                           |                     | exploratory)                                                      |     |
| 45 |                           |                     |                                                                   |     |
| 46 |                           |                     |                                                                   |     |
| 47 |                           |                     |                                                                   |     |
| 48 | <b>Methods:</b>           |                     |                                                                   |     |
| 49 | <b>Participants,</b>      |                     |                                                                   |     |
| 50 | <b>interventions, and</b> |                     |                                                                   |     |
| 51 | <b>outcomes</b>           |                     |                                                                   |     |
| 52 |                           |                     |                                                                   |     |
| 53 |                           |                     |                                                                   |     |
| 54 |                           |                     |                                                                   |     |
| 55 | Study setting             | <a href="#">#9</a>  | Description of study settings (eg, community clinic, academic     | 6   |
| 56 |                           |                     | hospital) and list of countries where data will be collected.     |     |
| 57 |                           |                     | Reference to where list of study sites can be obtained            |     |
| 58 |                           |                     |                                                                   |     |
| 59 |                           |                     |                                                                   |     |
| 60 |                           |                     |                                                                   |     |

|    |                      |                      |                                                                                                                                                                                                                                                                                                                                                                                |             |
|----|----------------------|----------------------|--------------------------------------------------------------------------------------------------------------------------------------------------------------------------------------------------------------------------------------------------------------------------------------------------------------------------------------------------------------------------------|-------------|
| 1  | Eligibility criteria | <a href="#">#10</a>  | Inclusion and exclusion criteria for participants. If applicable, eligibility criteria for study centres and individuals who will perform the interventions (eg, surgeons, psychotherapists)                                                                                                                                                                                   | 7-10        |
| 2  |                      |                      |                                                                                                                                                                                                                                                                                                                                                                                |             |
| 3  |                      |                      |                                                                                                                                                                                                                                                                                                                                                                                |             |
| 4  |                      |                      |                                                                                                                                                                                                                                                                                                                                                                                |             |
| 5  |                      |                      |                                                                                                                                                                                                                                                                                                                                                                                |             |
| 6  | Interventions:       | <a href="#">#11a</a> | Interventions for each group with sufficient detail to allow replication, including how and when they will be administered                                                                                                                                                                                                                                                     | 11-12       |
| 7  | description          |                      |                                                                                                                                                                                                                                                                                                                                                                                |             |
| 8  |                      |                      |                                                                                                                                                                                                                                                                                                                                                                                |             |
| 9  |                      |                      |                                                                                                                                                                                                                                                                                                                                                                                |             |
| 10 | Interventions:       | <a href="#">#11b</a> | Criteria for discontinuing or modifying allocated interventions for a given trial participant (eg, drug dose change in response to harms, participant request, or improving / worsening disease)                                                                                                                                                                               | 12-13       |
| 11 | modifications        |                      |                                                                                                                                                                                                                                                                                                                                                                                |             |
| 12 |                      |                      |                                                                                                                                                                                                                                                                                                                                                                                |             |
| 13 |                      |                      |                                                                                                                                                                                                                                                                                                                                                                                |             |
| 14 |                      |                      |                                                                                                                                                                                                                                                                                                                                                                                |             |
| 15 | Interventions:       | <a href="#">#11c</a> | Strategies to improve adherence to intervention protocols, and any procedures for monitoring adherence (eg, drug tablet return; laboratory tests)                                                                                                                                                                                                                              | n/a         |
| 16 | adherence            |                      |                                                                                                                                                                                                                                                                                                                                                                                | describe in |
| 17 |                      |                      |                                                                                                                                                                                                                                                                                                                                                                                | original    |
| 18 |                      |                      |                                                                                                                                                                                                                                                                                                                                                                                | protocol    |
| 19 |                      |                      |                                                                                                                                                                                                                                                                                                                                                                                |             |
| 20 |                      |                      |                                                                                                                                                                                                                                                                                                                                                                                |             |
| 21 |                      |                      |                                                                                                                                                                                                                                                                                                                                                                                |             |
| 22 |                      |                      |                                                                                                                                                                                                                                                                                                                                                                                |             |
| 23 | Interventions:       | <a href="#">#11d</a> | Relevant concomitant care and interventions that are permitted or prohibited during the trial                                                                                                                                                                                                                                                                                  | n/a         |
| 24 | concomitant care     |                      |                                                                                                                                                                                                                                                                                                                                                                                | describe in |
| 25 |                      |                      |                                                                                                                                                                                                                                                                                                                                                                                | original    |
| 26 |                      |                      |                                                                                                                                                                                                                                                                                                                                                                                | protocol    |
| 27 |                      |                      |                                                                                                                                                                                                                                                                                                                                                                                |             |
| 28 |                      |                      |                                                                                                                                                                                                                                                                                                                                                                                |             |
| 29 |                      |                      |                                                                                                                                                                                                                                                                                                                                                                                |             |
| 30 |                      |                      |                                                                                                                                                                                                                                                                                                                                                                                |             |
| 31 | Outcomes             | <a href="#">#12</a>  | Primary, secondary, and other outcomes, including the specific measurement variable (eg, systolic blood pressure), analysis metric (eg, change from baseline, final value, time to event), method of aggregation (eg, median, proportion), and time point for each outcome. Explanation of the clinical relevance of chosen efficacy and harm outcomes is strongly recommended | 14-16       |
| 32 |                      |                      |                                                                                                                                                                                                                                                                                                                                                                                |             |
| 33 |                      |                      |                                                                                                                                                                                                                                                                                                                                                                                |             |
| 34 |                      |                      |                                                                                                                                                                                                                                                                                                                                                                                |             |
| 35 |                      |                      |                                                                                                                                                                                                                                                                                                                                                                                |             |
| 36 |                      |                      |                                                                                                                                                                                                                                                                                                                                                                                |             |
| 37 |                      |                      |                                                                                                                                                                                                                                                                                                                                                                                |             |
| 38 |                      |                      |                                                                                                                                                                                                                                                                                                                                                                                |             |
| 39 |                      |                      |                                                                                                                                                                                                                                                                                                                                                                                |             |
| 40 | Participant timeline | <a href="#">#13</a>  | Time schedule of enrolment, interventions (including any run-ins and washouts), assessments, and visits for participants. A schematic diagram is highly recommended (see Figure)                                                                                                                                                                                               | 11-12       |
| 41 |                      |                      |                                                                                                                                                                                                                                                                                                                                                                                |             |
| 42 |                      |                      |                                                                                                                                                                                                                                                                                                                                                                                |             |
| 43 |                      |                      |                                                                                                                                                                                                                                                                                                                                                                                |             |
| 44 |                      |                      |                                                                                                                                                                                                                                                                                                                                                                                |             |
| 45 |                      |                      |                                                                                                                                                                                                                                                                                                                                                                                |             |
| 46 | Sample size          | <a href="#">#14</a>  | Estimated number of participants needed to achieve study objectives and how it was determined, including clinical and statistical assumptions supporting any sample size calculations                                                                                                                                                                                          | 16          |
| 47 |                      |                      |                                                                                                                                                                                                                                                                                                                                                                                |             |
| 48 |                      |                      |                                                                                                                                                                                                                                                                                                                                                                                |             |
| 49 |                      |                      |                                                                                                                                                                                                                                                                                                                                                                                |             |
| 50 |                      |                      |                                                                                                                                                                                                                                                                                                                                                                                |             |
| 51 | Recruitment          | <a href="#">#15</a>  | Strategies for achieving adequate participant enrolment to reach target sample size                                                                                                                                                                                                                                                                                            | 16          |
| 52 |                      |                      |                                                                                                                                                                                                                                                                                                                                                                                |             |
| 53 |                      |                      |                                                                                                                                                                                                                                                                                                                                                                                |             |
| 54 |                      |                      |                                                                                                                                                                                                                                                                                                                                                                                |             |

**Methods: Assignment  
of interventions (for  
controlled trials)**

|    |                        |                      |                                                                    |             |
|----|------------------------|----------------------|--------------------------------------------------------------------|-------------|
| 1  | Allocation: sequence   | <a href="#">#16a</a> | Method of generating the allocation sequence (eg, computer-        | 10          |
| 2  | generation             |                      | generated random numbers), and list of any factors for             |             |
| 3  |                        |                      | stratification. To reduce predictability of a random sequence,     |             |
| 4  |                        |                      | details of any planned restriction (eg, blocking) should be        |             |
| 5  |                        |                      | provided in a separate document that is unavailable to those who   |             |
| 6  |                        |                      | enrol participants or assign interventions                         |             |
| 7  |                        |                      |                                                                    |             |
| 8  |                        |                      |                                                                    |             |
| 9  |                        |                      |                                                                    |             |
| 10 | Allocation             | <a href="#">#16b</a> | Mechanism of implementing the allocation sequence (eg, central     | 10          |
| 11 | concealment            |                      | telephone; sequentially numbered, opaque, sealed envelopes),       |             |
| 12 | mechanism              |                      | describing any steps to conceal the sequence until interventions   |             |
| 13 |                        |                      | are assigned                                                       |             |
| 14 |                        |                      |                                                                    |             |
| 15 | Allocation:            | <a href="#">#16c</a> | Who will generate the allocation sequence, who will enrol          | n/a         |
| 16 | implementation         |                      | participants, and who will assign participants to interventions    |             |
| 17 |                        |                      |                                                                    | describe in |
| 18 |                        |                      |                                                                    | original    |
| 19 |                        |                      |                                                                    | protocol    |
| 20 |                        |                      |                                                                    |             |
| 21 |                        |                      |                                                                    |             |
| 22 |                        |                      |                                                                    |             |
| 23 |                        |                      |                                                                    |             |
| 24 |                        |                      |                                                                    |             |
| 25 | Blinding (masking)     | <a href="#">#17a</a> | Who will be blinded after assignment to interventions (eg, trial   | n/a         |
| 26 |                        |                      | participants, care providers, outcome assessors, data analysts),   |             |
| 27 |                        |                      | and how                                                            | describe in |
| 28 |                        |                      |                                                                    | original    |
| 29 |                        |                      |                                                                    | protocol    |
| 30 |                        |                      |                                                                    |             |
| 31 |                        |                      |                                                                    |             |
| 32 |                        |                      |                                                                    |             |
| 33 | Blinding (masking):    | <a href="#">#17b</a> | If blinded, circumstances under which unblinding is permissible,   | 10          |
| 34 | emergency unblinding   |                      | and procedure for revealing a participant's allocated intervention |             |
| 35 |                        |                      | during the trial                                                   |             |
| 36 |                        |                      |                                                                    |             |
| 37 |                        |                      |                                                                    |             |
| 38 | <b>Methods: Data</b>   |                      |                                                                    |             |
| 39 | <b>collection,</b>     |                      |                                                                    |             |
| 40 | <b>management, and</b> |                      |                                                                    |             |
| 41 | <b>analysis</b>        |                      |                                                                    |             |
| 42 |                        |                      |                                                                    |             |
| 43 |                        |                      |                                                                    |             |
| 44 |                        |                      |                                                                    |             |
| 45 | Data collection plan   | <a href="#">#18a</a> | Plans for assessment and collection of outcome, baseline, and      | 14-16       |
| 46 |                        |                      | other trial data, including any related processes to promote data  |             |
| 47 |                        |                      | quality (eg, duplicate measurements, training of assessors) and a  |             |
| 48 |                        |                      | description of study instruments (eg, questionnaires, laboratory   |             |
| 49 |                        |                      | tests) along with their reliability and validity, if known.        |             |
| 50 |                        |                      | Reference to where data collection forms can be found, if not in   |             |
| 51 |                        |                      | the protocol                                                       |             |
| 52 |                        |                      |                                                                    |             |
| 53 |                        |                      |                                                                    |             |
| 54 |                        |                      |                                                                    |             |
| 55 |                        |                      |                                                                    |             |
| 56 | Data collection plan:  | <a href="#">#18b</a> | Plans to promote participant retention and complete follow-up,     | n/a         |
| 57 | retention              |                      | including list of any outcome data to be collected for             |             |
| 58 |                        |                      |                                                                    | describe in |
| 59 |                        |                      |                                                                    |             |
| 60 |                        |                      |                                                                    |             |

|                                                  |                      |                                                                                                                                                                                                                                                                                                                                       |                   |
|--------------------------------------------------|----------------------|---------------------------------------------------------------------------------------------------------------------------------------------------------------------------------------------------------------------------------------------------------------------------------------------------------------------------------------|-------------------|
|                                                  |                      | participants who discontinue or deviate from intervention protocols                                                                                                                                                                                                                                                                   | original protocol |
| Data management                                  | <a href="#">#19</a>  | Plans for data entry, coding, security, and storage, including any related processes to promote data quality (eg, double data entry; range checks for data values). Reference to where details of data management procedures can be found, if not in the protocol                                                                     | 10, 13            |
| Statistics: outcomes                             | <a href="#">#20a</a> | Statistical methods for analysing primary and secondary outcomes. Reference to where other details of the statistical analysis plan can be found, if not in the protocol                                                                                                                                                              | 14-16             |
| Statistics: additional analyses                  | <a href="#">#20b</a> | Methods for any additional analyses (eg, subgroup and adjusted analyses)                                                                                                                                                                                                                                                              | n/a               |
| Statistics: analysis population and missing data | <a href="#">#20c</a> | Definition of analysis population relating to protocol non-adherence (eg, as randomised analysis), and any statistical methods to handle missing data (eg, multiple imputation)                                                                                                                                                       | 14-16             |
| <b>Methods: Monitoring</b>                       |                      |                                                                                                                                                                                                                                                                                                                                       |                   |
| Data monitoring: formal committee                | <a href="#">#21a</a> | Composition of data monitoring committee (DMC); summary of its role and reporting structure; statement of whether it is independent from the sponsor and competing interests; and reference to where further details about its charter can be found, if not in the protocol. Alternatively, an explanation of why a DMC is not needed | 14                |
| Data monitoring: interim analysis                | <a href="#">#21b</a> | Description of any interim analyses and stopping guidelines, including who will have access to these interim results and make the final decision to terminate the trial                                                                                                                                                               | 16-17             |
| Harms                                            | <a href="#">#22</a>  | Plans for collecting, assessing, reporting, and managing solicited and spontaneously reported adverse events and other unintended effects of trial interventions or trial conduct                                                                                                                                                     | 13, 16            |
| Auditing                                         | <a href="#">#23</a>  | Frequency and procedures for auditing trial conduct, if any, and whether the process will be independent from investigators and the sponsor                                                                                                                                                                                           | 13, 14,           |
| <b>Ethics and dissemination</b>                  |                      |                                                                                                                                                                                                                                                                                                                                       |                   |
| Research ethics approval                         | <a href="#">#24</a>  | Plans for seeking research ethics committee / institutional review board (REC / IRB) approval                                                                                                                                                                                                                                         | 17, 20            |

|                                             |                      |                                                                                                                                                                                                                                                                                     |                      |
|---------------------------------------------|----------------------|-------------------------------------------------------------------------------------------------------------------------------------------------------------------------------------------------------------------------------------------------------------------------------------|----------------------|
| Protocol amendments                         | <a href="#">#25</a>  | Plans for communicating important protocol modifications (eg, changes to eligibility criteria, outcomes, analyses) to relevant parties (eg, investigators, REC / IRBs, trial participants, trial registries, journals, regulators)                                                  | 17                   |
| Consent or assent                           | <a href="#">#26a</a> | Who will obtain informed consent or assent from potential trial participants or authorised surrogates, and how (see Item 32)                                                                                                                                                        | 17                   |
| Consent or assent: ancillary studies        | <a href="#">#26b</a> | Additional consent provisions for collection and use of participant data and biological specimens in ancillary studies, if applicable                                                                                                                                               | 17                   |
| Confidentiality                             | <a href="#">#27</a>  | How personal information about potential and enrolled participants will be collected, shared, and maintained in order to protect confidentiality before, during, and after the trial                                                                                                | 17                   |
| Declaration of interests                    | <a href="#">#28</a>  | Financial and other competing interests for principal investigators for the overall trial and each study site                                                                                                                                                                       | 17                   |
| Data access                                 | <a href="#">#29</a>  | Statement of who will have access to the final trial dataset, and disclosure of contractual agreements that limit such access for investigators                                                                                                                                     | n/a                  |
| Ancillary and post trial care               | <a href="#">#30</a>  | Provisions, if any, for ancillary and post-trial care, and for compensation to those who suffer harm from trial participation                                                                                                                                                       | n/a                  |
| Dissemination policy: trial results         | <a href="#">#31a</a> | Plans for investigators and sponsor to communicate trial results to participants, healthcare professionals, the public, and other relevant groups (eg, via publication, reporting in results databases, or other data sharing arrangements), including any publication restrictions | 17                   |
| Dissemination policy: authorship            | <a href="#">#31b</a> | Authorship eligibility guidelines and any intended use of professional writers                                                                                                                                                                                                      | n/a                  |
| Dissemination policy: reproducible research | <a href="#">#31c</a> | Plans, if any, for granting public access to the full protocol, participant-level dataset, and statistical code                                                                                                                                                                     | 17                   |
| <b>Appendices</b>                           |                      |                                                                                                                                                                                                                                                                                     |                      |
| Informed consent materials                  | <a href="#">#32</a>  | Model consent form and other related documentation given to participants and authorised surrogates                                                                                                                                                                                  | Available on request |
| Biological specimens                        | <a href="#">#33</a>  | Plans for collection, laboratory evaluation, and storage of                                                                                                                                                                                                                         | n/a                  |

biological specimens for genetic or molecular analysis in the  
current trial and for future use in ancillary studies, if applicable

None The SPIRIT checklist is distributed under the terms of the Creative Commons Attribution License CC-BY-ND 3.0. This checklist can be completed online using <https://www.goodreports.org/>, a tool made by the EQUATOR Network in collaboration with [Penelope.ai](https://penelope.ai)

For peer review only

# BMJ Open

## **Medroxyprogesterone acetate plus metformin for fertility-sparing treatment of atypical endometrial hyperplasia and endometrial carcinoma: trial protocol for a prospective, randomized, open, blinded-endpoint design, dose response trial (FELICIA Trial)**

|                                 |                                                                                                                                                                                                                                                                                                                                                                                                                                                                                                                                        |
|---------------------------------|----------------------------------------------------------------------------------------------------------------------------------------------------------------------------------------------------------------------------------------------------------------------------------------------------------------------------------------------------------------------------------------------------------------------------------------------------------------------------------------------------------------------------------------|
| Journal:                        | <i>BMJ Open</i>                                                                                                                                                                                                                                                                                                                                                                                                                                                                                                                        |
| Manuscript ID                   | bmjopen-2019-035416.R1                                                                                                                                                                                                                                                                                                                                                                                                                                                                                                                 |
| Article Type:                   | Protocol                                                                                                                                                                                                                                                                                                                                                                                                                                                                                                                               |
| Date Submitted by the Author:   | 18-Dec-2019                                                                                                                                                                                                                                                                                                                                                                                                                                                                                                                            |
| Complete List of Authors:       | Mitsuhashi, Akira; Chiba University Graduate School of Medicine School of Medicine, Reproductive Medicine<br>Kawasaki, Yohei; Chiba University Hospital, Biostatistics Section, Clinical Research Center<br>Hori, Makoto; Chiba University Hospital, Clinical Research Center<br>Fujiwara, Tadami; Chiba University Hospital, Clinical Research Center<br>Hanaoka, Hideki; Chiba University Hospital, Clinical Research Center<br>Shozu, Makio; Chiba University Graduate School of Medicine School of Medicine, Reproductive Medicine |
| <b>Primary Subject Heading</b>: | Oncology                                                                                                                                                                                                                                                                                                                                                                                                                                                                                                                               |
| Secondary Subject Heading:      | Obstetrics and gynaecology                                                                                                                                                                                                                                                                                                                                                                                                                                                                                                             |
| Keywords:                       | Gynaecological oncology < GYNAECOLOGY, Adult oncology < ONCOLOGY, Gynaecological oncology < ONCOLOGY                                                                                                                                                                                                                                                                                                                                                                                                                                   |
|                                 |                                                                                                                                                                                                                                                                                                                                                                                                                                                                                                                                        |

SCHOLARONE™  
Manuscripts



I, the Submitting Author has the right to grant and does grant on behalf of all authors of the Work (as defined in the below author licence), an exclusive licence and/or a non-exclusive licence for contributions from authors who are: i) UK Crown employees; ii) where BMJ has agreed a CC-BY licence shall apply, and/or iii) in accordance with the terms applicable for US Federal Government officers or employees acting as part of their official duties; on a worldwide, perpetual, irrevocable, royalty-free basis to BMJ Publishing Group Ltd ("BMJ") its licensees and where the relevant Journal is co-owned by BMJ to the co-owners of the Journal, to publish the Work in this journal and any other BMJ products and to exploit all rights, as set out in our [licence](#).

The Submitting Author accepts and understands that any supply made under these terms is made by BMJ to the Submitting Author unless you are acting as an employee on behalf of your employer or a postgraduate student of an affiliated institution which is paying any applicable article publishing charge ("APC") for Open Access articles. Where the Submitting Author wishes to make the Work available on an Open Access basis (and intends to pay the relevant APC), the terms of reuse of such Open Access shall be governed by a Creative Commons licence – details of these licences and which [Creative Commons](#) licence will apply to this Work are set out in our licence referred to above.

Other than as permitted in any relevant BMJ Author's Self Archiving Policies, I confirm this Work has not been accepted for publication elsewhere, is not being considered for publication elsewhere and does not duplicate material already published. I confirm all authors consent to publication of this Work and authorise the granting of this licence.

## Protocol

# **Medroxyprogesterone acetate plus metformin for fertility-sparing treatment of atypical endometrial hyperplasia and endometrial carcinoma: trial protocol for a prospective, randomized, open, blinded-endpoint design, dose response trial (FELICIA Trial)**

Running head: Dose response trial for metformin + MPA

Authors: Akira Mitsuhashi<sup>1)</sup>, Yohei Kawasaki<sup>2)</sup>, Makoto Hori<sup>3)</sup>, Tadami Fujiwara<sup>3)</sup>, Hideki Hanaoka<sup>3)</sup>, Makio Shozu<sup>1)</sup>.

Institutional affiliations:

1) Department of Reproductive Medicine, Graduate School of Medicine, Chiba University,

1-8-1 Inohana, Chuo-ku, Chiba 260-8670, Japan

2) Biostatistics Section, Clinical Research Center, Chiba University Hospital, 1-8-1 Inohana,

Chuo-ku, Chiba 260-8677, Japan

3) Clinical Research Center, Chiba University Hospital, 1-8-1 Inohana, Chuo-ku, Chiba

260-8677, Japan

1  
2  
3  
4  
5  
6  
7  
8  
9  
10  
11  
12  
13  
14  
15  
16  
17  
18  
19  
20  
21  
22  
23  
24  
25  
26  
27  
28  
29  
30  
31  
32  
33  
34  
35  
36  
37  
38  
39  
40  
41  
42  
43  
44  
45  
46  
47  
48  
49  
50  
51  
52  
53  
54  
55  
56  
57  
58  
59  
60

Corresponding author: Akira Mitsuhashi. Department of Reproductive Medicine, Graduate School of Medicine, Chiba University, 1-8-1 Inohana Chuo-ku, Chiba 260-8670, Japan  
Tel: +81-43-226-2121; Fax: +81-43-226-2122; E-mail: antira@faculty.chiba-u.jp

**Word count 3251**

**Abstract**

**Introduction:** Progestin therapy is the only fertility sparing treatment option for patients with atypical endometrial hyperplasia (AEH) and endometrial cancer (EC). However, the results of three meta-analyses revealed a high remission rate, as well as an association with a high rate of relapse. We previously conducted a phase II of medroxyprogesterone acetate (MPA) plus metformin as a fertility-sparing treatment for AEH and EC patients, and reported that metformin inhibited disease relapse after remission.

**Methods and analysis:** A randomized open blinded-endpoint design phase IIb dose response trial was planned to commence in July 2019. The trial aims to identify the appropriate dose of metformin to be combined with medroxyprogesterone acetate therapy for fertility-sparing treatment of patients with AEH and EC. The primary endpoint of the trial is the three-year relapse-free survival (RFS) rate. The secondary endpoints are RFS rate, the overall rate of response to medroxyprogesterone acetate therapy, the conception rate after treatment, the outcome of pregnancy, toxicity evaluation, and changes in insulin resistance and body mass

index. A total of 120 patients will be enrolled from 15 Japanese institutions within a 2.5-year period and followed up for at least 3 years.

**Ethics and dissemination:** The protocol was approved by the institutional Review Board at Chiba University Hospital and boards at 14 other institutions. The trial will be conducted according to the principles of the World Medical Association Declaration of Helsinki and in accordance with GCP standards. The trial findings will be published in a peer-reviewed journal.

**Trial registration number:** jRCT2031190065

### **Strengths and limitations of this trial**

- 1) This is the first randomized controlled trial that aims to identify the appropriate metformin dose to be added to medroxyprogesterone acetate therapy for fertility-sparing treatment of patients with AEH and EC.
- 2) The trial has been designed to meet high-quality randomized clinical trial criteria by performing central randomization and ensuring multicenter participation.
- 3) Since the association between the trial primary endpoint, 3-year relapse-free survival rate, and medroxyprogesterone acetate plus metformin treatment will be examined, this study can

evaluate the efficacy of the addition of metformin to medroxyprogesterone in fertility-sparing treatment of AEH and EC patients.

- 4) To reduce the bias associated with the open-label design, and to maintain objectivity, we used blinded investigators to evaluate the endpoint, and judgment was based on standardized criteria for central pathological diagnosis.
- 5) A limitation of this trial is that it is not confirmatory in the evaluation of the primary endpoint.

**Keywords:** metformin, medroxyprogesterone acetate, fertility sparing treatment, atypical endometrial hyperplasia, endometrial cancer

## INTRODUCTION

Progestin therapy is the only fertility sparing treatment option for patients with atypical endometrial hyperplasia (AEH) and endometrial cancer (EC). The guidelines of the National Comprehensive Cancer Network and the European Society of Gynecological Oncology Task Force regarding fertility-sparing treatment recommend progestin therapy for patients with AEH and EC who wish to conceive.[1, 2] However, the results of three meta-analyses revealed a high remission rate, as well as an association with a high rate of relapse.[3-5]

EC is often associated with obesity and/or diabetes mellitus, indicating that insulin resistance is a risk factor for EC.[6-8] We previously reported the incidence of obesity, insulin resistance, and abnormal glucose metabolism among young EC patients as 84%, 83%, and 78%, respectively.[9] Hyperinsulinemia due to insulin resistance plays an important role in carcinogenesis.[10] Epidemiological and basic research studies support this notion; thus, insulin resistance may be a promising target for the treatment and prevention of EC.[10, 11] Metformin is a biguanide that is widely used for the treatment of type 2 diabetes mellitus. Several recent epidemiological studies have revealed that metformin reduces the incidence of cancer and cancer-related mortality in diabetes patients.[12, 13]

Moreover, metformin inhibited the growth of breast, ovarian, endometrial, and prostate cancer cells, probably through the suppression of MAPK, cyclin D1, and mammalian

1  
2  
3  
4  
5  
6  
7  
8  
9  
10  
11  
12  
13  
14  
15  
16  
17  
18  
19  
20  
21  
22  
23  
24  
25  
26  
27  
28  
29  
30  
31  
32  
33  
34  
35  
36  
37  
38  
39  
40  
41  
42  
43  
44  
45  
46  
47  
48  
49  
50  
51  
52  
53  
54  
55  
56  
57  
58  
59  
60

target of rapamycin activity.[14, 15] Furthermore, metformin enhanced ovulation in patients with polycystic ovary syndrome and improved pregnancy rates.[16, 17]

Based on this information, we previously conducted a phase II study of medroxyprogesterone acetate (MPA) plus metformin as a fertility-sparing treatment for AEH and EC patients and reported that metformin had inhibited disease relapse after remission. Additionally, metformin prevented weight gain caused by MPA and had improved insulin sensitivity among the registered patients.[18]

Therefore, we conducted a dose response randomized phase II study of MPA plus metformin for fertility-sparing treatment of AEH and EC. The trial protocol was approved by the Pharmaceuticals and Medical Devices Agency, Japan in June 2019 and the trial was initiated in July 2019. Approval was obtained from the institutional review board prior to patient recruitment at each institution. This trial was registered at the Japan Registry of Clinical Trials under trial no. jRCT2031190065 (<https://jrct.niph.go.jp>).

**METHODS AND ANALYSIS**

**Objectives**

The purpose of this trial is to verify the appropriate dose of metformin in a new fertility-sparing treatment involving a combination of metformin and MPA among patients

with AEH and EC. Further, this trial aims to investigate the long-term efficacy and safety of this combination therapy.

### **Design of the trial**

This trial is a prospective, randomized, open, blinded-endpoint design, dose-response trial.

Original Japanese protocol and informed consent form are provided in the online supplementary appendix 1,2, and this protocol meets the criteria of the Standard Protocol Items: Recommendations for Interventional Trials (SPIRIT) 2013 statement. The trial is being conducted in 15 institutions across Japan. A list of recruiting sites is provided in online supplementary appendix 3. A local principal investigator (PI), supported by at least two other staff members (such as a research nurse or clinical research coordinator), conducts the study at each participating site.

### **Endpoints**

The primary endpoint of the trial is the three-year relapse-free survival (RFS) rate, which indicates the achievement of remission without recurrence 3 years from the date of trial entry for all subjects.

The secondary endpoints are RFS rate, the overall response rate to MPA therapy, conception rate following treatment, the outcome of pregnancy, results of toxicity assessment, and

1  
2  
3  
4  
5  
6  
7  
8  
9  
10  
11  
12  
13  
14  
15  
16  
17  
18  
19  
20  
21  
22  
23  
24  
25  
26  
27  
28  
29  
30  
31  
32  
33  
34  
35  
36  
37  
38  
39  
40  
41  
42  
43  
44  
45  
46  
47  
48  
49  
50  
51  
52  
53  
54  
55  
56  
57  
58  
59  
60

changes in insulin resistance and body mass index (BMI). The RFS period was defined as the period from the date of trial entry to the time of recurrence after remission or to the time of exclusion from the trial due to non-remission. Cases of non-remission are defined as those that experience disease progression before 32 weeks and those that do not achieve remission by 32 weeks. The conception rate was defined as the rate of successful pregnancies among patients who were in remission and tried to have a child.

**Eligibility criteria**

All patients underwent a 75 g oral glucose tolerance test before registration for the evaluation of glucose intolerance and insulin resistance

**Inclusion criteria**

1. Histologically confirmed AEH or well-differentiated endometrioid adenocarcinoma, presumed to be International Federation of Gynecology and Obstetrics stage IA, and in which the EC was limited to the endometrium. Endometrial tissue sampling for diagnosis was performed by dilatation and curettage.
2. No prior treatment with a high dose of progestin, the levonorgestrel-releasing intrauterine system, or chemotherapy for an endometrial lesion (the uses of low or medium doses of a progestin for menstrual cycle regulation were permitted).

3. Over 20 years of age and under 42 years of age
4. Eastern Cooperative Oncology Group Performance Status 0
5. Fulfillment of each of the following parameters
  - 5.1. Leucocyte count  $\geq 3,000/\text{mm}^3$
  - 5.2. Platelet count  $\geq 10 \times 10^4/\text{mm}^3$
  - 5.3. Aspartate aminotransferase (glutamic-oxaloacetic transaminase) level less than twice the maximum institutional standard
  - 5.4. Alanine aminotransferase (glutamic-pyruvic transaminase) level less than twice the maximum institutional standard
  - 5.5. Serum creatinine concentration  $\leq 1.0 \text{ mg/dl}$
  - 5.6. Creatinine clearance  $\leq 60 \text{ L/min}$
  - 5.7. Total bilirubin level  $\leq 1.5 \text{ mg/dl}$
  - 5.8. D-dimer level  $< 1.5 \mu\text{g/ml}$
6. No prior medical history of chemical sensitivity to any of the chemicals being used in the trial (MPA and metformin)
7. No clinical problem on electrocardiography
8. The patient provided written informed consent

### Exclusion criteria

1. Contraindication to the drugs used in this trial (MPA and metformin)
  - 1.1. Susceptible to lactic acidosis
    - 1.1.1. A history of lactic acidosis
    - 1.1.2. Moderate to severe kidney damage or dialysis
    - 1.1.3. Severe liver damage
    - 1.1.4. Shock, cardiac arrest, cardiac infarction, thrombosis of the lung, or severe cardiovascular and/or lung damage
    - 1.1.5. Ingestion of excessive amounts of alcohol
    - 1.1.6. Gastrointestinal damage such as dehydration or diarrhea and/or vomiting that could cause dehydration
  - 1.2. Serious ketosis, diabetic coma or pre-coma, or type I diabetes
  - 1.3. Serious infections and/or injuries, a medical history including recent surgery, or the expectation that the patient will soon undergo surgery
  - 1.4. Malnourishment or starvation, hyposthenia, or pituitary and/or adrenal gland disorders
  - 1.5. Pregnancy or the expectation that the woman could be pregnant
  - 1.6. Prior medical history of chemical sensitivity to biguanides or the compounds present in the drugs being tested
  - 1.7. High risk of thrombosis

- 1.7.1. Surgery within the past week
- 1.7.2. Cerebral and/or cardiac infarction, thrombophlebitis, or a prior history thereof
- 1.7.3. Valvular heart disease, atrial fibrillation, endocarditis, or other serious cardiac conditions
- 1.7.4. The current administration of hormone treatments
- 1.8. Undiagnosed breast lesions or vaginal and/or urinary bleeding
- 1.9. Serious liver damage
- 1.10. Hypocalcemia
2. Psychosis or mental symptoms that could make it difficult for patients to participate in the trial
3. Uncontrolled diabetes mellitus
4. Diabetic patients who already take biguanides, including metformin (patients who manage their diabetes via diet and exercise therapy, or those who take medicines apart from metformin are eligible).
5. Concomitant malignancies
6. Systemic administration of steroids
7. Determined to be ineligible by the physician in charge for any other reason

## Randomization

1  
2  
3  
4  
5  
6  
7  
8  
9  
10  
11  
12  
13  
14  
15  
16  
17  
18  
19  
20  
21  
22  
23  
24  
25  
26  
27  
28  
29  
30  
31  
32  
33  
34  
35  
36  
37  
38  
39  
40  
41  
42  
43  
44  
45  
46  
47  
48  
49  
50  
51  
52  
53  
54  
55  
56  
57  
58  
59  
60

After confirming the fulfillment of the eligibility criteria, patients are randomly assigned to arm A (MPA alone group), arm B (MPA + metformin 750 mg / day group), and arm C (MPA + metformin 1500 mg / day group) in a 1:1:1 allocation via a dynamic and centralized randomization procedure implemented with the DATATRAK Electronic Data Capture system (DATATRAK ONE V.14.1.0; <https://secure.datatrak.net>). Minimization imbalance Method with a probability of 0.9 is used for randomization[19]. The stratification factors to be balanced across treatment arms are BMI, histology, and marital status.

**Treatment methods**

The patients are randomized into 3 treatment arms (Fig. 1).

Arm A (control) MPA alone group: Patients receive a daily oral dose of 600 mg of MPA for 32 weeks.

Arm B (experimental) MPA + metformin 750 mg/day group: Patients receive a daily oral dose of 600 mg of MPA for 32 weeks.

Patients simultaneously receive a daily dose of metformin (initial dose, 500 mg/day; increased monthly up to 750 mg/day if no adverse effects have developed) in combination with MPA from the initial point of treatment.

After MPA administration, metformin therapy is continued until conception or disease recurrence.

Arm C (experimental): MPA + metformin 1500 mg/day group:

Patients receive a daily oral dose of 600 mg of MPA for 32 weeks.

Patients simultaneously receive a daily dose of metformin (initial dose, 500 mg/day; increased monthly up to 1500 mg/day if no adverse effects have developed) in combination with MPA from the initial point of treatment.

After MPA administration, metformin therapy is continued until conception or disease recurrence.

Endometrial curettage under anesthesia will be performed to evaluate pathological response every 8 weeks. (Fig 2)

The protocol treatment was halted if MPA therapy did not result in remission, according to the following criteria: the absence of any hormonal effect by 16 weeks; disease progression at 8, 16, and 24 weeks; or no remission at 32 weeks. A combination of 100 mg of aspirin was permissible if patients received MPA.

### **Maintenance period**

1  
2  
3  
4  
5  
6  
7  
8  
9  
10  
11  
12  
13  
14  
15  
16  
17  
18  
19  
20  
21  
22  
23  
24  
25  
26  
27  
28  
29  
30  
31  
32  
33  
34  
35  
36  
37  
38  
39  
40  
41  
42  
43  
44  
45  
46  
47  
48  
49  
50  
51  
52  
53  
54  
55  
56  
57  
58  
59  
60

After completing the MPA treatment, only patients who achieved remission will enter the maintenance period. Follow up will be performed by conducting endometrial sampling with a pipelle or with any other appropriate equipment.. Patients are examined every three months until three years after the initial treatment (at the time of evaluation for the primary endpoint). After that, patients are examined every six months. If a patient desires to conceive in the immediate future, they are allowed to become pregnant immediately after achieving remission. Fertility treatment is recommended. A low dose of estrogen-progestin or medium doses of progestin is recommended for patients who do not desire to conceive, to control the menstrual cycle until they wish to conceive.

**Criteria for discontinuation of trial treatment**

The defined criteria for the discontinuation of trial medication are as follows:

1. The protocol treatment was halted if MPA therapy did not result in remission, according to the following criteria: the absence of any hormonal effect by 16 weeks; disease progression at 8, 16, and 24 weeks; or no remission at 32 weeks.
2. If the patients relapse after remission
3. Severe adverse effects (progressive or persistent) which in the opinion of the PI may be related to the study medication
4. Other situations, judged by the PI, in which MPA or metformin cannot be continued

### **Data management, monitoring, safety and auditing**

Monitors will ensure that the investigational team is complying with the study protocol and GCP standards, that the data and AEs are accurately and appropriately recorded in the eCRFs, that severe AEs (SAEs) are reported to the trial coordinator and the investigational drug provider, and that those meeting the SAE reporting criteria are reported to the institutional review board (IRB). AEs will be classified in accordance with the Medical Dictionary for Regulatory Activities, Japanese translation MedDRA/J V.22.0 (MedDRA Japanese Maintenance Organization, Tokyo, Japan). All participants with AEs are to be followed up during the course of the AE until their resolution, or for 4 weeks after the end of the trial. All SAEs will be reported to all investigators, discussed through a web-based AE reporting system, and will be reported to the PMDA, if necessary.

### **Data monitoring committee**

The data monitoring committee comprises three clinical trial specialists, including a biostatistician, are were not associated with the current study. The committee will meet at least twice a year and all the data obtained from the current trial will be checked by the committee.

1  
2  
3  
4  
5  
6  
7  
8  
9  
10  
11  
12  
13  
14  
15  
16  
17  
18  
19  
20  
21  
22  
23  
24  
25  
26  
27  
28  
29  
30  
31  
32  
33  
34  
35  
36  
37  
38  
39  
40  
41  
42  
43  
44  
45  
46  
47  
48  
49  
50  
51  
52  
53  
54  
55  
56  
57  
58  
59  
60

**Statistical analysis**

**Primary endpoints**

An analysis of the effectiveness of primary endpoints will be conducted on the full analysis set. The following closed testing procedure will be used to assess the three groups:

MPA-alone group as the control group, the group with MPA plus metformin (750 mg), and the group with MPA plus metformin (1500 mg).

1. The MPA-alone, MPA plus metformin (750 mg), and MPA plus metformin (1500 mg) groups will be pooled and analyzed via a log-rank test. If the difference is significant, move to the next step; if not, terminate the procedure.

2. For the MPA-alone and the MPA plus metformin (1500 mg) groups, a log-rank test will be performed. If the difference is significant, move to the next step; if not, terminate the procedure.

3. For the MPA-alone and MPA plus metformin (750 mg) groups, a log-rank test will be performed. If the difference is significant, move to the next step; if not, terminate the procedure.

4. For the MPA plus metformin (750 mg) and MPA plus metformin (1500 mg) groups, a log-rank test will be performed.

**Secondary endpoints**

The same analysis performed on primary endpoints will be applied to the per protocol set. In addition, an analysis based on the Cox proportional hazards model will be carried out by adjusting for necessary allocation factors and layers.

Other items to be evaluated are the complete response rate for the MPA treatment period; the rate of trial continuation for the MPA-alone and MPA plus metformin groups; the recurrence-free survival time and recurrence-free rate in each year for the maintenance period; BMI values and homeostatic model assessment of insulin resistance results of all response cases that expressed the desire to become pregnant; the proportion of patients that became pregnant at least once during the trial period; outcomes of pregnant patients (miscarriage, stillbirth, live birth, weeks of gestation), and of all response cases that expressed the desire to become pregnant; and the proportion of patients that gave birth to a child.

### **Safety endpoints**

In the analysis of secondary safety endpoints, the number and rate of adverse events in an adverse event rate safety analysis set will be evaluated. Particularly, we will evaluate items in which a grade 3 or greater adverse event will occur (grade 2 or greater in the case of neurotoxicity).

1  
2  
3  
4  
5  
6  
7  
8  
9  
10  
11  
12  
13  
14  
15  
16  
17  
18  
19  
20  
21  
22  
23  
24  
25  
26  
27  
28  
29  
30  
31  
32  
33  
34  
35  
36  
37  
38  
39  
40  
41  
42  
43  
44  
45  
46  
47  
48  
49  
50  
51  
52  
53  
54  
55  
56  
57  
58  
59  
60

**Target number of cases and the grounds for setting it**

Based on previous studies, the non-recurrence rate for the MPA-alone group was assumed to be 60% and the non-recurrence rate for the MPA plus metformin group 85%. The same setting was applied for both groups for the following items: the response rate during the MPA treatment period was 80%, the probability of withdrawal during the maintenance period was 5%, the probability of pregnancy was 10%, patients for whom the trial was terminate during pregnancy were treated as non-recurrence-in-trial cases, the two-tailed significance level was 5%, and the power was 80%.

Based on these configurations, the number of cases was calculated through simulation. As a result, the necessary number of cases per group is 40, and 120 in total.

**Interim analysis and monitoring**

No interim analysis is planned.

**Patient and public involvement**

Patients and the public were not involved in the design of this trial.

**Ethics and dissemination**

The trial will be conducted in accordance with the Ordinance on the Standards for the Implementation of Clinical Trials (GCP Ordinance) and the principles of the World Medical Association (WMA) Declaration of Helsinki. All participants will receive adequate information about the nature, purpose, possible risk and benefits of the trial, and about alternative therapeutic choices, using an informed consent form approved by the IRB at Chiba University Hospital and boards at 14 other institutions (The names of Ethics Committee: online supplementary appendix 4). The informed consent form, signed by the participant, is required for enrolment in the trial. We intend to publish results of the FELICA trial in a major journal.

## DISCUSSION

This trial was planned to determine the appropriate dose of metformin in a new fertility-sparing treatment involving a combination of metformin and MPA among patients with AEH and EC. To confirm the appropriate dose of metformin, the RFS rate was set as the primary endpoint.

In Japan, pharmaceutical approval for the dose of metformin was for a maximum of 2250 mg per day and only for patients with diabetes mellitus. The recommended maintenance dose of metformin was 750 to 1500 mg per day. In a previous phase 2 trial, metformin (initial dose, 750 mg/day; increased weekly in increments of 750 mg/day up to 2,250 mg/day if no adverse

1  
2  
3  
4  
5  
6  
7  
8  
9  
10  
11  
12  
13  
14  
15  
16  
17  
18  
19  
20  
21  
22  
23  
24  
25  
26  
27  
28  
29  
30  
31  
32  
33  
34  
35  
36  
37  
38  
39  
40  
41  
42  
43  
44  
45  
46  
47  
48  
49  
50  
51  
52  
53  
54  
55  
56  
57  
58  
59  
60

effects occurred) was administered concurrently with MPA since initiation of treatment.[18]

Although the dose was reduced to under 1500 mg per day in some patients, no difference was found in treatment efficacy between the 1500 mg and 2250 mg groups (unpublished data). To consider long term feasibility, we set the maximum dose of this trial as 1500 mg per day.

This protocol was agreed upon with regulatory strategy consultation of the Pharmaceuticals and Medical Devices Agency.

Most studies of fertility sparing treatments, including our previous phase 2 trial, have only evaluated relapse rates in remission patients.[3,4] An evaluation of the efficacy of metformin depends on both the response rate and recurrence rate; however, even if remission rates are low, if response rates are also low it may not necessarily mean that metformin is effective.

Therefore, we defined the three-year RFS rate as the primary endpoint of this trial. This means the achievement of remission without recurrence 3 years from the date of trial enrolment.

This trial has some strengths. First, we are able to evaluate the long-term efficacy of metformin because the primary endpoint of this trial is the 3-year RFS rate. Following the first phase 2 trial of metformin combined with progestin for fertility-sparing treatment of AEH and EC started in 2009 and reported on in 2016, there are five trials currently examining the effect of metformin in fertility-sparing treatment for AEH and EC (NCT02035787, NCT03538704, NCT01968317, NCT02990728, NCT01686126). In these

1  
2  
3  
4 studies, the primary endpoint is set as the pathological response rate. However, only one  
5  
6  
7 phase 2 trial has reported on relapse rate as a secondary endpoint. Second, further evidence of  
8  
9  
10 the long-term efficacy of metformin will be based on continued metformin therapy following  
11  
12  
13 the conclusion of MPA administration, until conception or disease recurrence. Based on our  
14  
15  
16 previous phase 2 trial results, we hypothesized that metformin might prevent recurrence after  
17  
18  
19 remission. Metformin had indirect effects that were caused by the lowering of glucose and  
20  
21  
22 insulin levels, as described above. However, in ongoing trials, metformin is administered  
23  
24  
25 combined with progestin and is discontinued following remission. In these trials, only an  
26  
27  
28 anticancer effect of metformin was expected as an outcome. Finally, this trial will evaluate  
29  
30  
31 metabolic status. Most of the candidate patients for this trial were obese, consistent with  
32  
33  
34 insulin resistance and abnormal glucose metabolism. Based on our previous phase 2 trial, we  
35  
36  
37 will evaluate improvements in the metabolic profiles of these patients that are anticipated  
38  
39  
40 with the addition of metformin.  
41

42  
43 A limitation of this trial is that design is not that of a confirmatory trial. In addition, this  
44  
45  
46 trial will not use a placebo control group. However, evaluation of the remission and relapse  
47  
48  
49 rates, which are associated with the primary endpoint, will be performed by a pathological  
50  
51  
52 review board. The evaluation will occur under blind and independent conditions. Therefore,  
53  
54  
55 we believe that it will be possible to maintain objectivity and to reduce potential bias.  
56  
57  
58  
59  
60

1  
2  
3  
4  
5  
6  
7  
8  
9  
10  
11  
12  
13  
14  
15  
16  
17  
18  
19  
20  
21  
22  
23  
24  
25  
26  
27  
28  
29  
30  
31  
32  
33  
34  
35  
36  
37  
38  
39  
40  
41  
42  
43  
44  
45  
46  
47  
48  
49  
50  
51  
52  
53  
54  
55  
56  
57  
58  
59  
60

This trial is expected to clarify the clinical advantages of the combination of metformin with progestin. If this trial reveals the appropriate dose of metformin and shows long-term efficacy, clinical use of metformin for fertility sparing treatment of EC will be advanced.

**Acknowledgements:** We would like to thank all the staff and patients involved with the study at the 15 research sites, and the Trial Steering Committee and Central Pathology Committee and Data Monitoring Committee for their ongoing support throughout the trial. We would like to acknowledge the role of the Clinical Research Centre, Chiba University Hospital in supporting the ongoing delivery of the trial at the sites.

**Contributors:** All authors (AM, MH, TF, HH MS) made a significant contribution to the conception and design of the trial protocol. AM made major contributions to the design of this trial, development of the original trial protocol, and drafting of the initial manuscript. YK developed the statistical analysis plan. All authors (AM, MH, TF, HH MS) read and approved the final protocol.

**Funding:** This research is supported by the Japan Agency for Medical Research and Development under grant number JP19lk0201099.

**Competing interests:** HH has received personal fees from Torii Yakuhin, outside the submitted work. All remaining authors have declared no conflicts of interest.

**Patients consent:** Obtained

**Ethics approval:** The Institutional Review Board of each institution have approved the trial.

## REFERENCES

1. National Comprehensive Cancer Network [Internet]. Uterine Neoplasms: NCCN Clinical Practice Guidelines in Oncology (NCCN Guidelines®) [cited 2019 Feb 11].  
[https://www.nccn.org/professionals/physician\\_gls/pdf/uterine.pdf](https://www.nccn.org/professionals/physician_gls/pdf/uterine.pdf).
2. Rodolakis A, Biliatis I, Morice P, et al. European Society of Gynecological Oncology Task Force for Fertility Preservation: Clinical Recommendations for Fertility-Sparing Management in Young Endometrial Cancer Patients. *Int J Gynecol Cancer* 2015;25:1258–65.
3. Gunderson CC, Fader AN, Carson KA, Bristow RE. Oncologic and reproductive outcomes with progestin therapy in women with endometrial hyperplasia and grade 1 adenocarcinoma: a systematic review. *Gynecol Oncol* 2012;125:477–82.
4. Gallos ID, Yap J, Rajkhowa M, Luesley DM, Coomarasamy A, Gupta JK. Regression, relapse, and live birth rates with fertility-sparing therapy for endometrial cancer and atypical

- 1  
2  
3  
4 complex endometrial hyperplasia: a systematic review and meta-analysis. *Am J Obstet*  
5  
6  
7 *Gynecol* 2012;207:266.e1–12.  
8  
9
- 10 5. Wei J, Zhang W, Feng L, Gao W. Comparison of fertility-sparing treatments in patients with  
11  
12 early endometrial cancer and atypical complex hyperplasia: A meta-analysis and systematic  
13  
14 review. *Medicine (Baltimore)* 2017;96:e8034.  
15  
16  
17
- 18 6. Calle EE, Kaaks R. Overweight, obesity and cancer: epidemiological evidence and proposed  
19  
20 mechanisms. *Nat Rev Cancer* 2004;4:579–91.  
21  
22  
23
- 24 7. Renehan AG, Tyson M, Egger M, Heller RF, Zwahlen M. Body-mass index and incidence of  
25  
26 cancer: a systematic review and meta-analysis of prospective observational studies. *Lancet*  
27  
28 2008;371:569–78.  
29  
30  
31
- 32 8. Bianchini F, Kaaks R, Vainio H. Overweight, obesity, and cancer risk. *Lancet Oncol*  
33  
34 2002;3:565–74.  
35  
36  
37
- 38 9. Mitsuhashi A, Uehara T, Hanawa S, Shozu M. Prospective evaluation of abnormal glucose  
39  
40 metabolism and insulin resistance in patients with atypical endometrial hyperplasia and  
41  
42 endometrial cancer. *Support Care Cancer* 2017;25:1495–501.  
43  
44  
45
- 46 10. Pollak M. The insulin and insulin-like growth factor receptor family in neoplasia: an update.  
47  
48  
49  
50  
51  
52  
53  
54  
55  
56  
57  
58  
59  
60

11. Hernandez AV, Pasupuleti V, Benites-Zapata VA, Thota P, Deshpande A, Perez-Lopez FR. Insulin resistance and endometrial cancer risk: A systemic review and meta-analysis. *Eur J Cancer* 2015;51:2747–58.
12. Evans JM, Donnelly LA, Emslie-Smith AM, Alessi DR, Morris AD. Metformin and reduced risk of cancer in diabetic patients. *BMJ* 2005;330:1304–5.
13. Heckman-Stoddard BM, DeCensi A, Sahasrabuddhe VV, Ford LG. Repurposing metformin for the prevention of cancer and cancer recurrence. *Diabetologia* 2017;60:1639–49.
14. Quinn BJ, Kitagawa H, Memmott RM, Gills JJ, Dennis PA. Repositioning metformin for cancer prevention and treatment. *Trends Endocrinol Metab* 2013;24:469–80.
15. Pernicova I, Korbonits M. Metformin--mode of action and clinical implications for diabetes and cancer. *Nat Rev Endocrinol* 2014;10:143–56.
16. Nestler JE. Metformin for the treatment of the polycystic ovary syndrome. *N Engl J Med* 2008;358:47–54.
17. Practice Committee of the American Society for Reproductive Medicine. Role of metformin for ovulation induction in infertile patients with polycystic ovary syndrome (PCOS): a guideline. *Fertil Steril* 2017;108:426–41.
18. Mitsuhashi A, Sato Y, Kiyokawa T, Koshizaka M, Hanaoka H, Shozu M. Phase II study of medroxyprogesterone acetate plus metformin as a fertility-sparing treatment for atypical endometrial hyperplasia and endometrial cancer. *Ann Oncol* 2016;27:262–6.

1  
2  
3  
4  
5  
6  
7  
8  
9  
10  
11  
12  
13  
14  
15  
16  
17  
18  
19  
20  
21  
22  
23  
24  
25  
26  
27  
28  
29  
30  
31  
32  
33  
34  
35  
36  
37  
38  
39  
40  
41  
42  
43  
44  
45  
46  
47  
48  
49  
50  
51  
52  
53  
54  
55  
56  
57  
58  
59  
60

19. SJ Pocock, R Simon, Sequential treatment assignment with balancing for prognostic factors in the controlled clinical trial, Biometrics, 31 (1975), pp. 103-115.

**Figure legend**

Figure 1. Trial design. MPA, medroxyprogesterone acetate; pCR, pathological complete response

Figure 2. Judgement of remission flow chat during treatment period

- \*1, The protocol treatment is halted;
- \*2, Fertility treatment or menstrual control;

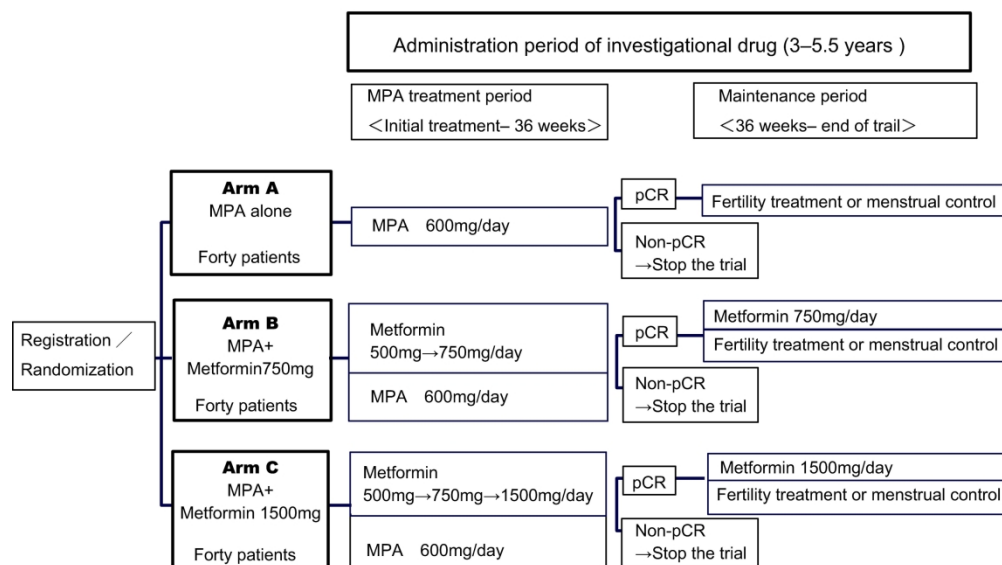

FIGURE 1

249x187mm (300 x 300 DPI)

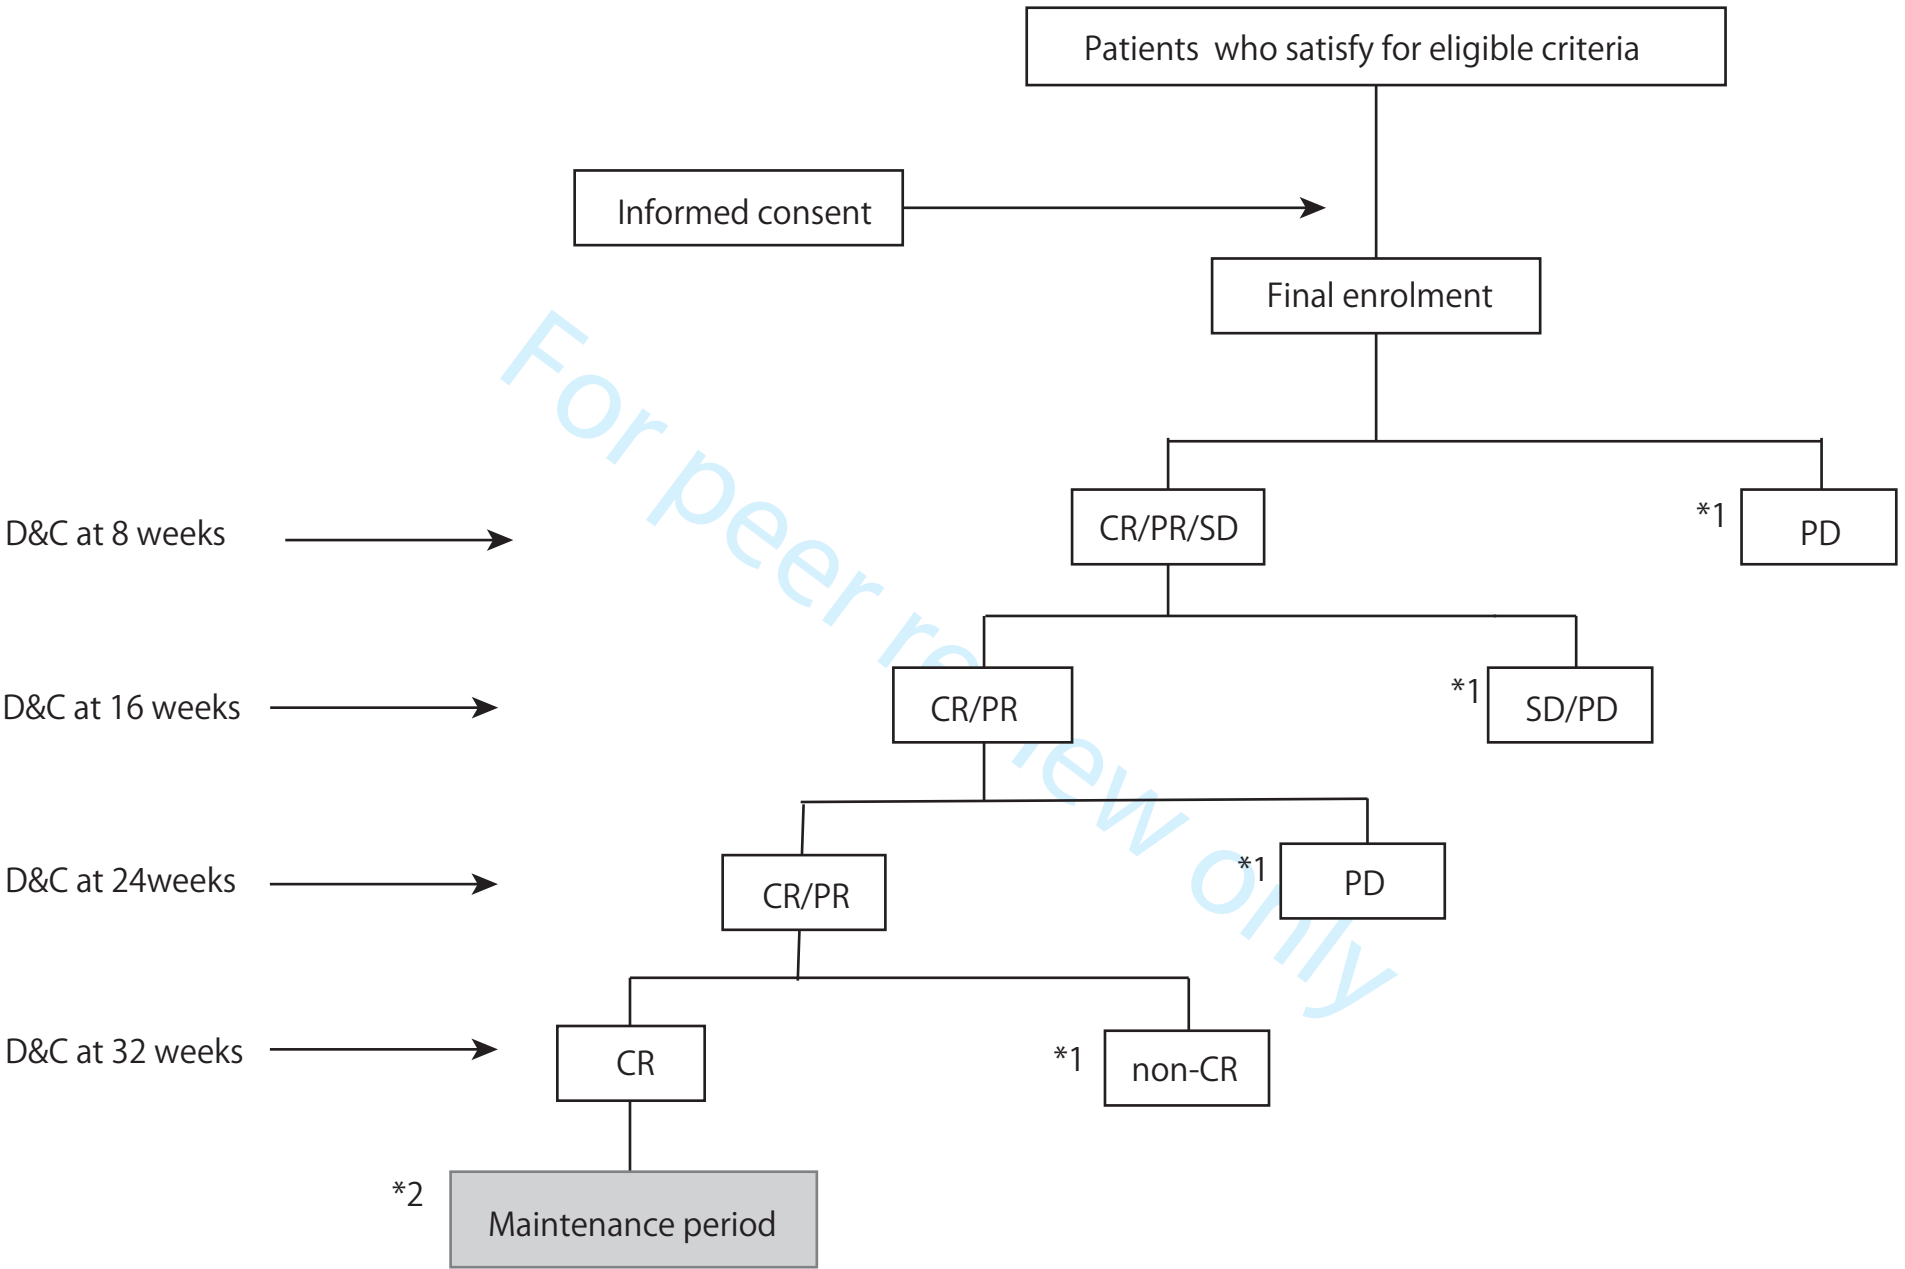

## 治験実施計画書

### 子宮内膜異型増殖症・子宮体癌に対するメドロキシプロゲステロンと メトホルミンの併用妊孕性温存療法の用量反応性試験

Medroxyprogesterone acetate plus metformin for fertility-sparing treatment of atypical endometrial hyperplasia and endometrial carcinoma: a prospective, randomized, open, blinded-endpoint design, dose response trial (FELICIA Trial)

治験実施計画書番号 : Chiba-Met003

版数 : 第 2.0 版

作成日 : 2019 年 11 月 15 日

#### 改訂履歴

| 作成日              | 版数      |
|------------------|---------|
| 2019 年 5 月 24 日  | 第 1.0 版 |
| 2019 年 6 月 12 日  | 第 1.1 版 |
| 2019 年 8 月 21 日  | 第 1.2 版 |
| 2019 年 11 月 15 日 | 第 2.0 版 |

#### 機密情報に関する注意

本治験実施計画書は機密情報であり、本治験に参加する治験責任医師、治験分担医師、治験協力者、治験実施医療機関、治験審査委員会（または治験審査委員会に該当する組織）、データモニタリング委員会に対して提供されるものです。よって、被験者に説明する場合を除き、治験責任医師及びメトホルミン提供者である日本新薬株式会社の文書による同意なしに、第三者へ開示すること、及び本治験の目的以外に利用することはできません。また、本治験の結果の一部または全部を学会、雑誌等外部に発表する場合には、治験責任医師及び日本新薬株式会社の承諾が必要となりますので、予め治験調整医師までご連絡頂けますようお願いいたします。

| 略号・略記        | 英語表記                                                              | 日本語表記                                          |
|--------------|-------------------------------------------------------------------|------------------------------------------------|
| PCOS         | Polycystic ovary syndrome                                         | 多嚢胞性卵巣症候群                                      |
| MPA          | Medroxyprogesterone acetate                                       | メドロキシプロゲステロン酢酸エステル                             |
| BMI          | Body Mass Index                                                   | ボディマス指数                                        |
| IGFBP-1      | Insulin-like growth factor-binding protein                        | インスリン様増殖因子結合タンパク                               |
| PI3K         | Phosphatidylinositol-3 kinase                                     | ホスファチジルイノシトール 3-キナーゼ                           |
| MAPK         | Mitogen-activated protein kinase                                  | マイトジェン活性化プロテインキナーゼ                             |
| IGF-1        | Insulin-like growth factor 1                                      | インスリン様増殖因子 1                                   |
| GLUT4        | Glucose transporter 4                                             | グルコーストランスポーター4                                 |
| mTOR         | Mammalian target of rapamycin                                     | 哺乳類ラパマイシン標的タンパク質                               |
| cyclinD1     | cyclinD                                                           | サイクリン D1                                       |
| AST<br>(GOT) | Aspartate aminotransferase<br>(Glutamic oxaloacetic transaminase) | アスパラギン酸アミノトランスフェラーゼ<br>(グルタミン酸オキサロ酢酸トランスアミナーゼ) |
| ALT<br>(GPT) | Alanine aminotransferase<br>(Glutamic pyruvic transaminase)       | アラニンアミノトランスフェラーゼ<br>(グルタミン酸ピルビン酸トランスアミナーゼ)     |
| PS<br>(ECOG) | Performance Status<br>(Eastern Cooperative Oncology Group)        | 一般状態 (ECOG)                                    |
| OGTT         | Oral glucose tolerance test                                       | 経口ブドウ糖負荷試験                                     |
| ALP          | Alkali phosphatase                                                | アルカリホスファターゼ                                    |
| UA           | Uric acid                                                         | 尿酸                                             |
| Cr           | Creatinine                                                        | クレアチニン                                         |
| LDL          | Low density lipoprotein                                           | 低比重リポタンパク                                      |
| TG           | Triacylglycerol                                                   | 中性脂肪                                           |
| HOMA-R       | Homeostasis model assessment ratio                                | インスリン抵抗性指数 <sup>ホーマーアール</sup> HOMA- R          |
| HbA1c        | Hemoglobin A1c                                                    | <sup>エーワンシー</sup> ヘモグロビン A 1 c                 |
| LH           | Luteinizing hormone                                               | 黄体形成ホルモン                                       |
| FSH          | Follicle stimulating hormone                                      | 卵胞刺激ホルモン                                       |
| PRL          | Prolactin                                                         | プロラクチン                                         |
| E2           | Estradiol                                                         | エストラジオール                                       |
| CR           | Complete response                                                 | 完全奏効                                           |
| PR           | Partial response                                                  | 部分奏効                                           |
| SD           | Stable disease                                                    | 不変                                             |
| DFS          | Disease free survival                                             | 無病生存率あるいは期間                                    |
| MRI          | Magnetic resonance imaging                                        | 磁気共鳴映像                                         |
| CT           | Computed tomography scanning                                      | コンピュータ断層撮影                                     |
| CTCAE        | Common Terminology Criteria for Adverse Events                    | 有害事象 共通用語規準                                    |

## 目次

|        |                                     |    |
|--------|-------------------------------------|----|
| 0.     | 治験の概要                               | 7  |
| 1.     | 治験の背景                               | 14 |
| 1.1.   | 対象疾患                                | 14 |
| 1.2.   | 妊孕性温存療法における標準治療                     | 15 |
| 1.3.   | 治験薬について                             | 16 |
| 1.4.   | 治験薬の対象疾患に対する治療効果・試験成績               | 17 |
| 2.     | 治験の目的と必要性                           | 18 |
| 2.1.   | 治験の目的と意義                            | 18 |
| 2.2.   | 本治験参加により予想される利益                     | 19 |
| 2.3.   | 本治験参加により予想される不利益                    | 19 |
| 3.     | 本治験で用いる基準・定義                        | 20 |
| 3.1.   | 病期分類                                | 20 |
| 3.2.   | 効果判定                                | 20 |
| 3.3.   | 有害事象評価                              | 20 |
| 3.4.   | PERFORMANCE STATUS (PS)             | 20 |
| 3.5.   | 子宮内膜精密検査                            | 21 |
| 4.     | 対象患者                                | 21 |
| 4.1.   | 選択基準                                | 21 |
| 4.2.   | 除外基準                                | 22 |
| 5.     | 被験者の同意                              | 23 |
| 5.1.   | 同意文書及びその他の説明文書の作成並びに改訂              | 23 |
| 5.2.   | 同意取得の時期と方法                          | 23 |
| 5.3.   | 被験者に対する説明事項                         | 24 |
| 6.     | 治験の方法                               | 25 |
| 6.1.   | 治験のデザイン                             | 25 |
| 6.2.   | 治験のアウトライン                           | 26 |
| 6.3.   | 目標被験者数と治験実施期間                       | 26 |
| 6.4.   | 施設登録及び症例登録・割付方法                     | 27 |
| 6.4.1. | 施設登録                                | 27 |
| 6.4.2. | 症例登録・割付                             | 27 |
| 6.4.3. | 割付調整因子                              | 28 |
| 6.4.4. | 登録例の中央病理診断                          | 28 |
| 6.5.   | 登録されなかった被験者の取り扱い                    | 29 |
| 6.6.   | 投与スケジュール及び投与量・投与方法                  | 29 |
| 6.7.   | 治験薬及び併用薬の減量・休薬基準                    | 33 |
| 6.7.1. | 第Ⅰ期におけるMPA及びメトホルミンの減量・休薬・再開・中止基準    | 33 |
| 6.7.2. | 第Ⅱ期におけるメトホルミンの減量・休薬・再開・中止基準 (B,C 群) | 35 |
| 6.7.3. | メトホルミンの増量基準                         | 37 |

|          |                                       |    |
|----------|---------------------------------------|----|
| 6.8.     | 妊娠の可能性・妊娠が判明した場合の取扱い                  | 37 |
| 6.9.     | 個々の症例の完了・中止基準                         | 38 |
| 6.9.1.   | 完了基準                                  | 38 |
| 6.9.2.   | 中止基準                                  | 38 |
| 6.10.    | 服薬状況調査の報告                             | 39 |
| 6.11.    | 併用薬・併用療法                              | 40 |
| 6.11.1.  | 情報収集する併用薬・併用療法                        | 40 |
| 6.11.2.  | 有害事象・合併症の対症療法                         | 40 |
| 6.12.    | 併用禁止薬・併用禁止療法                          | 41 |
| 6.13.    | 治験終了後の後治療                             | 41 |
| 7.       | 治験薬                                   | 41 |
| 7.1.     | 治験薬の概要                                | 41 |
| 7.2.     | 治験薬の包装・表示                             | 44 |
| 7.3.     | 治験薬の管理方法                              | 44 |
| 7.4.     | 併用薬                                   | 45 |
| 8.       | 観察・検査・評価項目、方法及び実施時期                   | 47 |
| 8.1.     | 実施スケジュールと手順                           | 47 |
| 8.1.1.   | スクリーニング検査                             | 50 |
| 8.1.2.   | 第Ⅰ期の観察・検査・評価項目                        | 51 |
| 8.1.2.1. | 0週(0か月)                               | 51 |
| 8.1.2.2. | 4週(1か月)、12週(3か月)、20週(5か月)、28週(7か月)    | 51 |
| 8.1.2.3. | 8週(2か月)、16週(4か月)、24週(6か月)             | 51 |
| 8.1.2.4. | 32週(8か月)                              | 52 |
| 8.1.2.5. | 寛解判定(36週,9か月)                         | 53 |
| 8.1.2.6. | 第Ⅰ期における中止時                            | 53 |
| 8.1.3.   | 第Ⅱ期の観察・検査・評価項目                        | 53 |
| 8.1.3.1. | 12週(3か月)毎(12、24、36、48、60、…、240、252週)  | 53 |
| 8.1.3.2. | 24週(6か月)毎(24、48、72、96、120、…、216、240週) | 54 |
| 8.1.3.3. | 第Ⅱ期における中止時                            | 54 |
| 8.1.4.   | 必要に応じて実施する安全性評価項目                     | 55 |
| 8.1.5.   | 完了時                                   | 55 |
| 8.1.6.   | 妊娠時                                   | 56 |
| 9.       | 有害事象発生時の取扱い                           | 56 |
| 9.1.     | 有害事象の定義                               | 56 |
| 9.2.     | 有害事象発生時の被験者への対応                       | 56 |
| 9.3.     | 報告の対象となる有害事象                          | 57 |
| 9.4.     | 有害事象の評価に必要な記載内容                       | 57 |
| 9.4.1.   | 有害事象の回復性と治験薬との因果関係                    | 57 |
| 9.5.     | 重篤な有害事象発生時の取り扱い                       | 58 |
| 9.5.1.   | 重篤な有害事象の定義                            | 58 |
| 9.5.2.   | 重篤な有害事象の報告手順                          | 58 |
| 9.6.     | 重要な有害事象の報告                            | 59 |

|           |                                               |    |
|-----------|-----------------------------------------------|----|
| 9.7.      | 予測される副作用.....                                 | 60 |
| 9.8.      | 重篤な有害事象の報告入手後の治験調整医師/調整事務局の対応手順.....          | 60 |
| 9.8.1.    | 独立データモニタリング委員会への報告.....                       | 60 |
| 9.8.2.    | 試験参加施設及び関連機関への連絡.....                         | 61 |
| 9.9.      | 緊急時の連絡先.....                                  | 61 |
| 10.       | 評価項目.....                                     | 61 |
| 10.1.     | 効果判定とエンドポイントの定義.....                          | 61 |
| 10.1.1.   | 用語の定義.....                                    | 61 |
| 10.1.2.   | MPA 治療の寛解.....                                | 62 |
| 10.1.3.   | 寛解・再発時の中央病理診断.....                            | 62 |
| 10.1.3.1. | 寛解判定.....                                     | 62 |
| 10.1.3.2. | 再発判定.....                                     | 63 |
| 10.1.4.   | エンドポイントの定義.....                               | 63 |
| 10.1.4.1. | 3 年無再発生存割合.....                               | 63 |
| 10.1.5.   | 寛解・寛解日.....                                   | 64 |
| 10.1.6.   | 再発(Relapse).....                              | 64 |
| 10.1.7.   | 完全奏効割合.....                                   | 64 |
| 10.1.8.   | 無再発生存期間.....                                  | 64 |
| 10.2.     | 主要評価項目.....                                   | 65 |
| 10.3.     | 副次評価項目.....                                   | 65 |
| 11.       | 統計学的事項.....                                   | 65 |
| 11.1.     | 解析対象集団.....                                   | 66 |
| 11.1.1.   | 全登録例.....                                     | 66 |
| 11.1.2.   | 最大の解析対象集団 (full analysis set: FAS).....       | 66 |
| 11.1.3.   | 治験実施計画書に適合した対象集団 (per protocol set: PPS)..... | 66 |
| 11.1.4.   | 安全性解析対象集団.....                                | 66 |
| 11.2.     | 目標症例数と設定根拠.....                               | 66 |
| 11.3.     | 症例の取り扱い.....                                  | 68 |
| 11.4.     | データの取り扱い.....                                 | 68 |
| 11.5.     | 統計解析項目及び解析計画.....                             | 68 |
| 11.5.1.   | 有効性の解析.....                                   | 68 |
| 11.5.1.1. | 主要評価項目.....                                   | 68 |
| 11.5.1.2. | 副次評価項目.....                                   | 69 |
| 11.5.2.   | 安全性の評価.....                                   | 70 |
| 11.5.3.   | 中間解析と治験の早期中止.....                             | 71 |
| 11.6.     | 独立データモニタリング委員会.....                           | 71 |
| 11.7.     | 最終解析.....                                     | 71 |
| 12.       | 治験実施計画書の遵守及び逸脱.....                           | 71 |
| 13.       | 治験実施計画書、症例報告書又は解析計画に関する変更.....                | 72 |
| 13.1.     | 治験実施計画書及び症例報告書の改訂.....                        | 72 |
| 13.2.     | 統計解析計画の変更.....                                | 72 |
| 14.       | 治験の中止、中断または終了.....                            | 72 |

1  
2  
3  
4  
5  
6  
7  
8  
9  
10  
11  
12  
13  
14  
15  
16  
17  
18  
19  
20  
21  
22  
23  
24  
25  
26  
27  
28  
29  
30  
31  
32  
33  
34  
35  
36  
37  
38  
39  
40  
41  
42  
43  
44  
45  
46  
47  
48  
49  
50  
51  
52  
53  
54  
55  
56  
57  
58  
59  
60

14.1. 治験全体での中止または中断の基準 ..... 72

14.2. 治験全体での中止又は中断する場合の手続き ..... 73

14.3. 個々の実施医療機関での治験を中止または中断する場合の手続き ..... 73

14.4. 治験の終了 ..... 73

15. データマネジメント ..... 74

15.1. データマネジメントの手順 ..... 74

15.2. データの収集 ..... 74

15.3. 症例報告書に直接記載され、かつ原資料(原データ)と解すべき資料の特定 ..... 74

16. 原資料及びその他の記録の取扱い ..... 75

16.1. 治験実施医療機関による記録の保存 ..... 75

16.2. 治験責任医師による記録の保存 ..... 75

16.3. 病理標本の取扱い ..... 75

17. 原資料の直接閲覧 ..... 76

18. 治験の品質管理及び品質保証 ..... 76

18.1. 品質管理 ..... 76

18.2. 品質保証 ..... 77

19. 倫理及び GCP ..... 77

20. 治験審査委員会 ..... 77

21. 健康被害補償及び保険 ..... 78

21.1. 健康被害の補償 ..... 78

21.2. 賠償保険への加入 ..... 78

22. 金銭の支払い ..... 78

23. 研究結果の発表 ..... 78

23.1. 論文発表の AUTHORSHIP 等に関する取り決め ..... 78

23.2. データ公開について ..... 79

24. 資金及び利益の衝突 ..... 79

25. 治験実施体制 ..... 79

26. 参考資料・文献リスト ..... 80

## 0. 治験の概要

|            |                                                                                                                                                                                                                                                                                                                                                                                                                                                                                                                                                                                                                                                                                                                                                                                                                  |        |                          |        |                                        |            |                |            |                |            |             |
|------------|------------------------------------------------------------------------------------------------------------------------------------------------------------------------------------------------------------------------------------------------------------------------------------------------------------------------------------------------------------------------------------------------------------------------------------------------------------------------------------------------------------------------------------------------------------------------------------------------------------------------------------------------------------------------------------------------------------------------------------------------------------------------------------------------------------------|--------|--------------------------|--------|----------------------------------------|------------|----------------|------------|----------------|------------|-------------|
| 治験課題名      | 子宮内膜異型増殖症・子宮体癌に対するメドロキシプロゲステロンとメトホルミンの併用妊孕性温存療法の用量反応性試験                                                                                                                                                                                                                                                                                                                                                                                                                                                                                                                                                                                                                                                                                                                                                          |        |                          |        |                                        |            |                |            |                |            |             |
| 治験の目的      | 子宮内膜異型増殖症及び子宮体癌患者に対する妊孕性温存療法としてメドロキシプロゲステロン（MPA）とメトホルミンを併用する新規治療法において、メトホルミンの適切な用量を検討することである。副次的に、メトホルミン併用療法の長期有効性・安全性を検討する。                                                                                                                                                                                                                                                                                                                                                                                                                                                                                                                                                                                                                                                                                     |        |                          |        |                                        |            |                |            |                |            |             |
| 治験デザイン     | 多施設共同、3用量群、オープン、ランダム化比較試験                                                                                                                                                                                                                                                                                                                                                                                                                                                                                                                                                                                                                                                                                                                                                                                        |        |                          |        |                                        |            |                |            |                |            |             |
| フェーズ       | 第 IIb 相試験＋長期有効性・安全性試験                                                                                                                                                                                                                                                                                                                                                                                                                                                                                                                                                                                                                                                                                                                                                                                            |        |                          |        |                                        |            |                |            |                |            |             |
| 被験薬        | 一般名：メトホルミン塩酸塩<br>剤型：錠剤（TAB）<br>保存条件：室温                                                                                                                                                                                                                                                                                                                                                                                                                                                                                                                                                                                                                                                                                                                                                                           |        |                          |        |                                        |            |                |            |                |            |             |
| 選択基準       | <p>以下のすべての条件に該当する患者を対象とする。</p> <p>(1) 文書同意取得前 24 週（168 日）から登録前までに行った子宮内膜検査において、組織学的に子宮内膜異型増殖症もしくは高分化型類内膜癌の確定診断が得られている患者で、麻酔下の子宮内膜全面搔爬術により他の組織型癌が否定されている患者。子宮体癌症例においては、文書同意取得前 8 週（56 日）から登録前までに行った CT・MRI・超音波検査で筋層浸潤・リンパ節転移・遠隔転移を認めない患者。</p> <p>(2) 子宮内膜異型増殖症もしくは高分化型類内膜癌に対する前治療歴（高用量黄体ホルモン療法、ミレーナ、化学療法）のない患者。月経調整目的のホルモン剤、低用量ピルの使用歴は可。</p> <p>(3) 同意取得時の年齢が、20 歳以上、42 歳以下である患者。</p> <p>(4) ECOG Performance status（PS）が 0 である患者。</p> <p>(5) 文書同意取得後、登録前 28 日以内の臨床検査値が、以下のすべてを満たす患者。</p> <table border="0"> <tr> <td>① 白血球数</td><td>3,000/mm<sup>3</sup> 以上</td></tr> <tr> <td>② 血小板数</td><td>10×10<sup>4</sup>/mm<sup>3</sup> 以上</td></tr> <tr> <td>③ AST（GOT）</td><td>施設基準値上限の 2 倍以下</td></tr> <tr> <td>④ ALT（GPT）</td><td>施設基準値上限の 2 倍以下</td></tr> <tr> <td>⑤ 血清クレアチニン</td><td>1.0mg/dl 以下</td></tr> </table> | ① 白血球数 | 3,000/mm <sup>3</sup> 以上 | ② 血小板数 | 10×10 <sup>4</sup> /mm <sup>3</sup> 以上 | ③ AST（GOT） | 施設基準値上限の 2 倍以下 | ④ ALT（GPT） | 施設基準値上限の 2 倍以下 | ⑤ 血清クレアチニン | 1.0mg/dl 以下 |
| ① 白血球数     | 3,000/mm <sup>3</sup> 以上                                                                                                                                                                                                                                                                                                                                                                                                                                                                                                                                                                                                                                                                                                                                                                                         |        |                          |        |                                        |            |                |            |                |            |             |
| ② 血小板数     | 10×10 <sup>4</sup> /mm <sup>3</sup> 以上                                                                                                                                                                                                                                                                                                                                                                                                                                                                                                                                                                                                                                                                                                                                                                           |        |                          |        |                                        |            |                |            |                |            |             |
| ③ AST（GOT） | 施設基準値上限の 2 倍以下                                                                                                                                                                                                                                                                                                                                                                                                                                                                                                                                                                                                                                                                                                                                                                                                   |        |                          |        |                                        |            |                |            |                |            |             |
| ④ ALT（GPT） | 施設基準値上限の 2 倍以下                                                                                                                                                                                                                                                                                                                                                                                                                                                                                                                                                                                                                                                                                                                                                                                                   |        |                          |        |                                        |            |                |            |                |            |             |
| ⑤ 血清クレアチニン | 1.0mg/dl 以下                                                                                                                                                                                                                                                                                                                                                                                                                                                                                                                                                                                                                                                                                                                                                                                                      |        |                          |        |                                        |            |                |            |                |            |             |

|      |                                                                                                                                                                                                                                                                                                                                                                                                                                                                                                                                                                                                                                                                                                        |
|------|--------------------------------------------------------------------------------------------------------------------------------------------------------------------------------------------------------------------------------------------------------------------------------------------------------------------------------------------------------------------------------------------------------------------------------------------------------------------------------------------------------------------------------------------------------------------------------------------------------------------------------------------------------------------------------------------------------|
|      | <p>⑥ クレアチニンクリアランス 60mL/min 以上<br/>(eGFR)</p> <p>⑦ 総ビリルビン 1.5mg/dl 以下</p> <p>⑧ D-ダイマー 1.5µg/ml 未満</p> <p>(6) 本治験使用薬剤（MPA、メトホルミン）に対し過敏症の既往歴のない患者。</p> <p>(7) 文書同意取得後、登録前 28 日以内に行った心電図検査において臨床<br/>上問題となる異常所見が認められない患者。</p> <p>(8) 本治験参加について十分な説明を受けた後、十分な理解の上、患者<br/>本人から文書で同意が得られた患者。</p>                                                                                                                                                                                                                                                                                                                                                                                                              |
| 除外基準 | <p>以下のいずれかの条件に該当する者は対象としない。</p> <p>(1) 本治験使用薬剤（MPA、メトホルミン）に対し禁忌の患者。</p> <p>① 乳酸アシドーシスを起こしやすい患者。<br/>（乳酸アシドーシスの既往がある/中等度以上の腎機能障害/透<br/>析患者/重度の肝機能障害/ショック、心不全、心筋梗塞、肺塞<br/>栓等心血管系、肺機能に高度の障害のある患者及びその他の<br/>低酸素血症を伴いやすい状態/過度のアルコール摂取者/脱水<br/>者、脱水状態が懸念される下痢、嘔吐等の胃腸障害のある患<br/>者。）</p> <p>② 重症ケトーシス、糖尿病性昏睡または前昏睡、Ⅰ型糖尿病患<br/>者。</p> <p>③ 重症感染症、手術前後、重篤な外傷のある患者。</p> <p>④ 栄養不良状態、飢餓状態、衰弱状態、脳下垂体機能不全また<br/>は副腎機能不全の患者。</p> <p>⑤ 妊婦または妊娠している可能性のある婦人。</p> <p>⑥ 治験薬（メトホルミン）の成分又はビグアナイド系薬剤に対<br/>し過敏症の既往歴のある患者。</p> <p>⑦ 血栓症を起こすおそれの高い患者。<br/>（手術後 1 週間以内の患者/脳梗塞、心筋梗塞、血栓静脈炎等<br/>の血栓性疾患又はその既往歴のある患者/動脈硬化症の患者/心<br/>臓弁膜症、心房細動、心内膜炎、重篤な心不全の心疾患のあ<br/>る患者/他のホルモン剤を投与されている患者）。</p> <p>⑧ 診断未確定の性器出血、尿路出血、乳房病変のある患者。</p> |

|      |                                                                                                                                                                                                                                                                                                                                                                                                                                      |
|------|--------------------------------------------------------------------------------------------------------------------------------------------------------------------------------------------------------------------------------------------------------------------------------------------------------------------------------------------------------------------------------------------------------------------------------------|
|      | <p>⑨ 重篤な肝障害のある患者。</p> <p>⑩ 高カルシウム血症の患者。</p> <p>(2) 精神病または精神症状を合併しており、治験への参加が困難と判断される患者。</p> <p>(3) コントロール不良の糖尿病患者。</p> <p>(4) メトホルミンを含むビグアナイド系糖尿病治療薬を服用している糖尿病患者（食事・運動療法、ビグアナイド系以外の内服治療症例は可。）。</p> <p>(5) 活動性の重複癌を有する患者。</p> <p>(6) ステロイド剤の継続的な全身投与（内服または静脈内）を受けている患者。</p> <p>(7) その他、主治医が不適格と判断した患者。</p>                                                                                                                            |
| 評価項目 | <p><b>主要評価項目</b></p> <p>3 年時無再発生存割合</p> <p><b>副次評価項目</b></p> <p>【有効性の副次評価項目】</p> <p>完全奏功割合、無再発生存期間、インスリン抵抗性・BMI 改善割合、妊娠率、妊娠・周産期予後</p> <p>【安全性の副次評価項目】</p> <p>有害事象発生割合</p>                                                                                                                                                                                                                                                            |
| 試験方法 | <p><b>【MPA 単独群：A 群】</b></p> <p>■ 第Ⅰ期</p> <ul style="list-style-type: none"> <li>併用薬（MPA）は初回処方日（0 週 Day-1）の翌日から服用開始する。初回処方日の翌日を治療期の開始日（Day1）と定義する。0 週 Day-1 の来院は、原則として登録後 14 日以内とする。</li> <li>MPA の服用量 1 日 600mg とし、36 週来院時（寛解判定日）まで服用する。</li> <li>MPA 服用中は血栓予防を目的として低用量アスピリンの併用を許容する。</li> </ul> <p><b>経過観察と効果判定</b></p> <ul style="list-style-type: none"> <li>第Ⅰ期は 4 週毎に外来経過観察を行う。8 週毎に麻酔下全面掻爬術による子宮内膜組織診を施行し、効果判定を行なう。</li> </ul> |

|    |  |
|----|--|
| 1  |  |
| 2  |  |
| 3  |  |
| 4  |  |
| 5  |  |
| 6  |  |
| 7  |  |
| 8  |  |
| 9  |  |
| 10 |  |
| 11 |  |
| 12 |  |
| 13 |  |
| 14 |  |
| 15 |  |
| 16 |  |
| 17 |  |
| 18 |  |
| 19 |  |
| 20 |  |
| 21 |  |
| 22 |  |
| 23 |  |
| 24 |  |
| 25 |  |
| 26 |  |
| 27 |  |
| 28 |  |
| 29 |  |
| 30 |  |
| 31 |  |
| 32 |  |
| 33 |  |
| 34 |  |
| 35 |  |
| 36 |  |
| 37 |  |
| 38 |  |
| 39 |  |
| 40 |  |
| 41 |  |
| 42 |  |
| 43 |  |
| 44 |  |
| 45 |  |
| 46 |  |
| 47 |  |
| 48 |  |
| 49 |  |
| 50 |  |
| 51 |  |
| 52 |  |
| 53 |  |
| 54 |  |
| 55 |  |
| 56 |  |
| 57 |  |
| 58 |  |
| 59 |  |
| 60 |  |

|                                                                                                                                                                                                                                                                                                                                                                                                                                                                                                                                                                                                                                                                                                                                                                                                                                                                                                                                                                                                                                                                                                                                                                                                                                                   |
|---------------------------------------------------------------------------------------------------------------------------------------------------------------------------------------------------------------------------------------------------------------------------------------------------------------------------------------------------------------------------------------------------------------------------------------------------------------------------------------------------------------------------------------------------------------------------------------------------------------------------------------------------------------------------------------------------------------------------------------------------------------------------------------------------------------------------------------------------------------------------------------------------------------------------------------------------------------------------------------------------------------------------------------------------------------------------------------------------------------------------------------------------------------------------------------------------------------------------------------------------|
| <ul style="list-style-type: none"> <li>効果判定は掻爬術施行後初回の外来までに行なうことを原則とし、判定結果が出るまで MPA 投与を継続する。効果判定は掻爬術施行から5週まで（+1週）を許容するが、32週時点の効果判定〔寛解判定〕は4週以内に行うこととする。</li> <li>32週時に CR が得られた症例を寛解とし、第Ⅱ期の治療に移行する。</li> <li>32週時に CR が得られない症例は非寛解として治験中止とする。</li> </ul> <p>■ 第Ⅱ期</p> <ul style="list-style-type: none"> <li>妊娠を希望しない症例は、原則治験完了まで月経コントロールを施行する（6.11 併用薬・併用療法 参照）。</li> <li>挙児希望症例に対しては直ちに妊娠を許可する。ただし一定期間月経コントロールを行うかどうかは施設ごとの判断で行う。</li> <li>挙児希望症例はなるべく不妊治療を行い、短期間での妊娠をめざす。</li> </ul> <p>【メトホルミン 750mg 群：B 群】</p> <p>■ 第Ⅰ期</p> <ul style="list-style-type: none"> <li>MPA は、1 日 600mg を 36 週来院時（寛解判定日）まで投与する。</li> <li>MPA は治験薬（メトホルミン）と同時に服用開始する。</li> <li>MPA 服用中は血栓予防を目的として低用量アスピリンの併用を許容する。</li> </ul> <p><u>治験薬の投与</u></p> <ul style="list-style-type: none"> <li>治験薬（メトホルミン）は初回処方日（0 週 Day-1）の翌日から服用開始する。初回処方日の翌日を治療期の開始日（Day1）と定義する。0 週 Day-1 の来院は、原則として登録後 14 日以内とする。</li> <li>メトホルミンの初回投与は 500mg（250mg×2、分 2）とする。</li> <li>メトホルミン開始 4 週間の経過観察後に、6.7.3 増量基準に従い、750mg（250mg×3、分 3）に増量する。</li> <li>以後、6.7 減量・休薬基準に従い、適切に減量、休薬を行なう。ただし、最大投与量を 750mg とする。</li> <li>全面掻爬術施行時は、当日のメトホルミン服用は中断する。</li> </ul> <p><u>経過観察と効果判定</u></p> <ul style="list-style-type: none"> <li>第Ⅰ期は 4 週毎に外来経過観察を行う。8 週毎に麻酔下全面掻爬術による子宮内膜組織診を施行し、効果判定を行なう。</li> </ul> |
|---------------------------------------------------------------------------------------------------------------------------------------------------------------------------------------------------------------------------------------------------------------------------------------------------------------------------------------------------------------------------------------------------------------------------------------------------------------------------------------------------------------------------------------------------------------------------------------------------------------------------------------------------------------------------------------------------------------------------------------------------------------------------------------------------------------------------------------------------------------------------------------------------------------------------------------------------------------------------------------------------------------------------------------------------------------------------------------------------------------------------------------------------------------------------------------------------------------------------------------------------|

|  |                                                                                                                                                                                                                                                                                                                                                                                                                                                                                                                                                                                                                                                                                                                                                                                                                                                                                                                                                                                                                                                                                                                                                                                                                                                                                            |
|--|--------------------------------------------------------------------------------------------------------------------------------------------------------------------------------------------------------------------------------------------------------------------------------------------------------------------------------------------------------------------------------------------------------------------------------------------------------------------------------------------------------------------------------------------------------------------------------------------------------------------------------------------------------------------------------------------------------------------------------------------------------------------------------------------------------------------------------------------------------------------------------------------------------------------------------------------------------------------------------------------------------------------------------------------------------------------------------------------------------------------------------------------------------------------------------------------------------------------------------------------------------------------------------------------|
|  | <ul style="list-style-type: none"> <li>効果判定は掻爬術施行後初回の外来までに行なうことを原則とし、判定結果が出るまで MPA およびメトホルミンの投与を継続する。</li> <li>効果判定は掻爬術施行から 5 週まで（+1 週）を許容するが、32 週時点の効果判定〔寛解判定〕は 4 週以内に行うこととする。</li> <li>32 週時に CR が得られた症例を寛解とし、第Ⅱ期の治療に移行する。</li> <li>32 週時に CR が得られない症例は非寛解として治験中止とする。</li> </ul> <p>■ 第Ⅱ期</p> <ul style="list-style-type: none"> <li>第Ⅰ期 36 週来院時に寛解判定が得られた症例では、MPA の投与を終了し、メトホルミンのみ投与を継続する。</li> <li>最大投与量を 750mg とし、<b>6.7 減量・休薬基準</b>に従い適切に減量、休薬を行なう。</li> <li>妊娠を希望しない症例は、原則治験完了まで月経コントロールを施行する（<b>6.11 併用薬・併用療法</b> 参照）。</li> <li>挙児希望症例に対しては直ちに妊娠を許可する。ただし一定期間月経コントロールを行うかどうかは施設ごとの判断で行う。</li> <li>挙児希望症例はなるべく不妊治療を行い、短期間での妊娠をめざす。</li> </ul> <p>【メトホルミン 1500mg 群：C 群】</p> <p>■ 第Ⅰ期</p> <ul style="list-style-type: none"> <li>MPA は、1 日 600mg を 36 週来院時（寛解判定日）まで投与する。</li> <li>MPA は治験薬（メトホルミン）と同時に服用開始する。</li> <li>MPA 服用中は血栓予防を目的として低用量アスピリンの併用を許容する。</li> </ul> <p><u>治験薬の投与</u></p> <ul style="list-style-type: none"> <li>治験薬（メトホルミン）は初回処方日（0 週 Day-1）の翌日から服用開始する。初回処方日の翌日を治療期の開始日（Day1）と定義する。0 週 Day-1 の来院は、原則として登録後 14 日以内とする。</li> <li>メトホルミンの初回投与は 500mg（250mg×2、分 2）とする。</li> <li>メトホルミン開始 4 週後に、<b>6.7.3 増量基準</b>に従い、4 週毎に 1500mg まで漸増する。増量は 500mg（250mg×2、分 2）→750mg（250mg×3、分 3）→1500mg（250mg×6、分 3）とする。</li> <li>以後、<b>6.7 減量・休薬基準</b>に従い、適切に減量、休薬を行なう。ただ</li> </ul> |
|--|--------------------------------------------------------------------------------------------------------------------------------------------------------------------------------------------------------------------------------------------------------------------------------------------------------------------------------------------------------------------------------------------------------------------------------------------------------------------------------------------------------------------------------------------------------------------------------------------------------------------------------------------------------------------------------------------------------------------------------------------------------------------------------------------------------------------------------------------------------------------------------------------------------------------------------------------------------------------------------------------------------------------------------------------------------------------------------------------------------------------------------------------------------------------------------------------------------------------------------------------------------------------------------------------|

1  
2  
3  
4  
5  
6  
7  
8  
9  
10  
11  
12  
13  
14  
15  
16  
17  
18  
19  
20  
21  
22  
23  
24  
25  
26  
27  
28  
29  
30  
31  
32  
33  
34  
35  
36  
37  
38  
39  
40  
41  
42  
43  
44  
45  
46  
47  
48  
49  
50  
51  
52  
53  
54  
55  
56  
57  
58  
59  
60

|            |                                                                                                                                                                                                                                                                                                                                                                                                                                                                                                                                                                                                                                                                                                                                                                                                                                                     |
|------------|-----------------------------------------------------------------------------------------------------------------------------------------------------------------------------------------------------------------------------------------------------------------------------------------------------------------------------------------------------------------------------------------------------------------------------------------------------------------------------------------------------------------------------------------------------------------------------------------------------------------------------------------------------------------------------------------------------------------------------------------------------------------------------------------------------------------------------------------------------|
|            | <p>し、最大投与量を 1500mg とする。</p> <ul style="list-style-type: none"><li>全面搔爬術施行時は、当日のメトホルミン服用は中断する。</li></ul> <p><u>経過観察と効果判定</u></p> <ul style="list-style-type: none"><li>第Ⅰ期は 4 週毎に外来経過観察を行う。</li><li>8 週毎に麻酔下全面搔爬術による子宮内膜組織診を施行し、効果判定を行なう。</li><li>効果判定は搔爬術施行後初回の外来までに行なうことを原則とし、判定結果が出るまで MPA 及びメトホルミンの投与を継続する。</li><li>効果判定は搔爬術施行から 5 週まで（+1 週）を許容するが、32 週時点の効果判定（寛解判定）は 4 週以内に行うこととする。</li><li>32 週時に CR が得られた症例を寛解とし、第Ⅱ期の治療に移行する。</li><li>32 週時に CR が得られない症例は非寛解として治験中止とする。</li></ul> <p>■ 第Ⅱ期</p> <ul style="list-style-type: none"><li>第Ⅰ期 36 週来院時に寛解判定が得られた症例では、MPA の投与を終了し、メトホルミンのみ投与を継続する。</li><li>最大投与量を 1500mg とし、<b>6.7 減量・休薬基準</b>に従い適切に減量、休薬を行なう。</li><li>妊娠を希望しない症例は、原則治験完了まで月経コントロールを施行する（<b>6.11 併用薬・併用療法</b> 参照）。</li><li>挙児希望症例に対しては直ちに妊娠を許可する。ただし一定期間月経コントロールを行うかどうかは施設ごとの判断で行う。</li><li>挙児希望症例はなるべく不妊治療を行い、短期間で妊娠をめざす。</li></ul> |
| 追加治療       | プロトコル治療不応例は中止基準に従い治験中止とする。中止後の治療は規定しない。                                                                                                                                                                                                                                                                                                                                                                                                                                                                                                                                                                                                                                                                                                                                                                                                             |
| 目標被験者数     | 120 例 （各群 40 例）                                                                                                                                                                                                                                                                                                                                                                                                                                                                                                                                                                                                                                                                                                                                                                                                                                     |
| 治験実施期間     | 治験実施期間： 5.5 年 （2019 年 7 月 1 日～2024 年 12 月 31 日）<br>症例登録期間： 2.5 年 （2019 年 7 月 1 日～2021 年 12 月 31 日）                                                                                                                                                                                                                                                                                                                                                                                                                                                                                                                                                                                                                                                                                                                                                  |
| 治験施設数      | 15 施設                                                                                                                                                                                                                                                                                                                                                                                                                                                                                                                                                                                                                                                                                                                                                                                                                                               |
| 倫理指針及び GCP | 本治験の実施に際しては省令 GCP、「ヘルシンキ宣言」（2013 年改訂）に基づく倫理的原則、及びその他の関連する規制要件に従う。                                                                                                                                                                                                                                                                                                                                                                                                                                                                                                                                                                                                                                                                                                                                                                                   |

|                |                                                                                                                                                                                                                   |
|----------------|-------------------------------------------------------------------------------------------------------------------------------------------------------------------------------------------------------------------|
| <b>治験審査委員会</b> | 本治験の実施に先立ち、実施医療機関の治験審査委員会は、本治験の倫理的、科学的及び医学的妥当性を審査する。本治験は、治験審査委員会の承認を得た後に実施する。治験審査委員会の審議結果が「修正の上で承認する」であった場合には、審議結果に基づいて実施計画書又は症例報告書、同意説明文書等を修正した後、本治験を実施する。また、治験審査委員会は少なくとも1年に1回以上の頻度で本治験が適切に実施されているか否かを継続的に審査する。 |
|----------------|-------------------------------------------------------------------------------------------------------------------------------------------------------------------------------------------------------------------|

## 1. 治験の背景

### 1.1. 対象疾患

脂肪の過剰摂取など食事の欧米化・晩婚化・出産回数の低下などライフスタイルの変化に伴い、わが国における子宮体癌発生頻度は年々増加している。日本産科婦人科腫瘍委員会の子宮体癌 I-IV 期の登録数は、1994 年の 2,115 例から 2015 年には 10,119 例に急増している。40 歳未満の患者数も、それぞれ 109 例から 471 例と上昇しており、妊孕性温存が必要な年齢での子宮体癌数が増加傾向にある<sup>1</sup>。

Body Mass Index (BMI) の上昇に伴って様々な種類のがんが増加する。Renehan らのメタ解析によれば、子宮体癌は、これらのがんのうちでも最も肥満 (BMI の上昇) と関連した固形癌とされる<sup>2</sup>。BMI が 25 以上の女性は、25 未満の女性と比較して子宮体癌のリスクが 2-4 倍高い<sup>3</sup>。また、糖尿病患者は、非糖尿病女性にくらべ発癌リスクが高く、子宮体癌の発症リスクも 2 倍高いとされている<sup>4</sup>。さらに、ケースコントロール研究では、インスリン高値・C ペプチド高値・Insulin-like Growth Factor Binding Protein-1 (IGFBP-1) の低下が子宮体癌発症リスクであることが示されている<sup>5,6</sup>。インスリンは、糖代謝 (肝臓でのグリコーゲン合成・骨格筋でのグルコース取り込み促進など) を調節しているが、高値の場合にはインスリンレセプターや Insulin-like growth factors-1 (IGF-1) レセプターを介して、1) Phosphoinositide 3-kinase/Akt (PI3K/PI3K/AKT) 経路・Mitogen-Activated Protein kinase (MAPK) 経路を活性化、2) IGFBP-1 の発現を抑制して free IGF-1 を増加することにより細胞増殖を刺激する<sup>7</sup>。さらに、インスリン抵抗性の増大にともなって増加する IGF-1・レプチンはさらに細胞増殖を刺激する<sup>8</sup>。これらの知見から、肥満・インスリン抵抗性・糖尿病は子宮体癌のリスク因子と考えられている。

子宮体癌のなかでも、妊孕性温存治療の対象となる 40 歳以下の若年性子宮体癌・子宮内膜異型増殖症の症例は、多嚢胞卵巣症候群 (Polycystic ovary syndrome : PCOS) ・肥満・インスリン抵抗性・糖尿病や耐糖能異常を有する頻度が高いことが報告されている<sup>9,10</sup>。また、子宮体癌患者の予後は、癌による死亡より、心筋梗塞や糖尿病など合併症による死亡のほうが高頻度とされる。このような背景から、糖尿病やインスリン抵抗性・高インスリン血症の治療が、予後改善に直結すると考えられている。

子宮内膜異型増殖症は、類内膜癌の前癌状態と考えられている組織所見で、両者は混在することが多い。試験的な生検で子宮内膜異型増殖症と診断され子宮摘出した症例では、40%以上の症例で子宮体癌が存在したと報告されている<sup>11</sup>。子宮内膜異型増殖症は前癌病変の性格を有するこ

とや高分化型類内膜癌の合併が多く、浸潤のない高分化型類内膜癌と同じような治療が行われている。

## 1.2. 妊孕性温存療法における標準治療

子宮体癌の標準治療は手術療法であるが、妊孕性温存を目的として行うプロゲスチン療法は、日本婦人科腫瘍学会の子宮体癌治療ガイドラインでは、推奨グレードCで考慮されている。ただし、温存治療の適応は、子宮内膜異型増殖症、及び子宮体癌のうち高分化型類内膜癌で超音波検査やMRI検査などで筋層浸潤の疑いがないと診断され、CTでリンパ節転移や遠隔転移の疑いのないIA期相当に限定されている<sup>12</sup>。

プロゲスチン投与による温存療法は、メタ解析によると奏効率は子宮体癌76%・子宮内膜異型増殖症86%で比較的高い(表1)<sup>13,14</sup>。プロゲスチン療法は、妊孕性温存希望例に対する標準治療と考えられるようになってきたが、一旦奏効した後の再発率が高いことが問題となっている。メタ解析によると、プロゲスチン療法で病変消失した症例のうち子宮内膜異型増殖症の26%、子宮体癌の41%に再発を認める。再発は1-3年で認め、再発までの中央値は24か月(4-72か月)と報告され、長期寛解を維持できる症例はおおよそ45%にすぎない<sup>13,14</sup>。わが国で行われた多施設共同第2相試験の報告では、子宮体癌の57%、子宮内膜異型増殖症の38%が再発し、再発までの期間中央値が34.6ヶ月とされ、約3年の経過観察で最終的に16例(73%)が子宮摘除をうけている<sup>15</sup>。

若年者に対する子宮温存治療は、少数例の報告が多く、プロゲスチンの投与方法や投与量は確立していない。温存治療に対し、わが国で選択できる薬剤は、MPA(ヒスロンH®)のみである。MPAの投与量は、報告により200-600mg/日と幅があるが(表2)、わが国では、多施設共同前向き試験の結果から600mg/日が一般的となっている。効果判定は、投与後6か月で行うことが多いが、9-12か月の長期投与で奏効する例も多く、6か月で完全消失(CR)に至らない場合でも、細胞効果を認める場合には、投与期間の延長が考慮される。

表 1 プロゲステロンを用いた妊孕性温存療法（レビュー及び多数例の報告）

|                                        |                   | 総症例数 | 奏効例(%)     | 再発例(%)    | 妊娠例(%)    |
|----------------------------------------|-------------------|------|------------|-----------|-----------|
| 子宮体癌                                   |                   |      |            |           |           |
| Gallos, et al. (2012) <sup>13</sup>    | Meta-analysis     | 408  | 301 (76.2) | 89 (40.6) | 75 (28)   |
| Gunderson, et al. (2012) <sup>14</sup> | Systematic review | 281  | 209 (74.6) | 74 (35.4) | 89 (34.8) |
| Ushijima, et al. (2012) <sup>15</sup>  | Phase 2           | 22   | 14 (63.6)  | 8 (57.1)  |           |
| 子宮内膜異型増殖症                              |                   |      |            |           |           |
| Gallos, et al. (2012) <sup>13</sup>    | Meta-analysis     | 151  | 127 (85.6) | 27 (26)   | 31 (26.3) |
| Gunderson, et al. (2012) <sup>14</sup> | Systematic review | 111  | 95 (86)    | 22 (23.1) | 28 (41)   |
| Ushijima, et al. (2007) <sup>15</sup>  | Phase 2           | 17   | 16 (94.1)  | 6 (37.5)  |           |

表 2 わが国における子宮体癌に対する MPA 療法

|                                       | 症例数 | 投与量<br>(mg/day) | 投与期間  | 奏効率(%)  | 再発数(%) |
|---------------------------------------|-----|-----------------|-------|---------|--------|
| Kaku, et al (2001) <sup>16</sup>      | 12  | 200-600         | 2-14M | 9(75)   | 2(22)  |
| Ota, et al (2005) <sup>17</sup>       | 12  | 600             | 3-12M | 5(42)   | 2(40)  |
| Niwa, et al (2005) <sup>18</sup>      | 12  | 400-600         | 6-10M | 12(100) | 8(67)  |
| Yahata, et al (2006) <sup>19</sup>    | 8   | 600             | 3-14M | 7(88)   | 7(100) |
| Minaguchi, et al (2007) <sup>20</sup> | 19  | 400-600         | 2-8M  | 15(79)  | 5(33)  |
| Ushijima, et al (2007) <sup>15</sup>  | 22  | 600             | 26W   | 14(64)  | 8(57)  |
| Yamazawa, et al (2007) <sup>21</sup>  | 9   | 400             | 6M    | 7(78)   | 2(25)  |
| Fujiwara, et al (2012) <sup>22</sup>  | 59  | 400-600         | 4-6M  | 42(71)  | 22(52) |

1.3. 治験薬について

メトホルミンは、肝臓・筋でインスリン抵抗性改善により、血糖・インスリン値下降作用を有する糖尿病治療薬で、糖尿病の予防効果も認めている<sup>23</sup>。作用機序はミトコンドリア呼吸鎖の抑制<sup>23</sup>、インスリン受容体チロシンキナーゼ活性の増強<sup>24</sup>、Glucose transporter type 4（GLUT4 トランスポーター）の細胞膜への移動の刺激<sup>25</sup>、細胞内成分を除去した卵母細胞におけるグリコーゲン合成酵素の刺激<sup>26</sup>、AMP 活性化プロテインキナーゼ(AMPK)の活性化<sup>27</sup>と考えられている。糖尿病患者への服用後の筋生検で、AMPK の活性化が報告され、in vivo でも効果が確認されている。

2005 年に Evans らが、メトホルミン服用中の糖尿病患者は、非服用者に比較し癌の発生が少なくいと報告して以来<sup>28</sup>、現在まで多数のコホート研究、ケースコントロール研究でメトホルミンの発癌予防効果が報告された。

メトホルミンは、乳癌・大腸癌・前立腺癌・卵巣癌・子宮体癌などの培養細胞株を用いた *in vitro* の実験でも、AMPK の活性化を介した Mammalian Target of Rapamycin (mTOR) の抑制や、MAPK の抑制を介した cyclin D1 の発現低下・p27 発現増加・pRB 抑制を認め、G1 停止から細胞増殖を抑制すると報告された<sup>29,30</sup>。臨床的には、糖尿病患者でメトホルミン服用者は、非服用者と比較し、乳癌の術前化学療法の奏効率が高いとの報告があり、抗がん剤との併用効果も期待されている<sup>31</sup>。また、メトホルミン服用により大腸ポリープの発生が抑制されたとの報告もある。

また、子宮体癌患者の術前に、糖尿病治療量のメトホルミンを投与したところ、術前後で癌組織中の Ki67 の発現の低下や MAPK、mTOR の抑制が認められ、*in vivo* での効果が確認された<sup>32</sup>。メトホルミン服用中の糖尿病患者は、非服用者に比較し子宮体癌の発生も少なく、予後も良好との疫学報告もされ<sup>33</sup>、子宮体癌の発癌、再発予防に効果が期待される。

また、わが国では保険適応はないが、海外では PCOS 症例の排卵誘発の第一選択となっている薬剤である<sup>34</sup>。PCOS は、肥満・インスリン抵抗性を有し、不妊以外に糖尿病・子宮体癌のリスクとなる病態である。メトホルミンによるインスリン抵抗性改善が、排卵率の上昇と同時に糖尿病や子宮体癌の予防になる可能性が考えられる。本治験の対象者は PCOS 症例も多く、メトホルミンに排卵誘発効果や妊娠率の改善効果も期待される。

メトホルミン（メトグルコ錠 250mg，グリコラン錠 250mg）の保険適応は糖尿病のみで、メトグルコ錠 250mg は最大 2250mg/日まで承認されている。一方、本治験で使用するグリコラン錠 250mg は、750mg/日まで承認されている。また、メトホルミンは保険適応外だが排卵誘発剤として臨床使用されている。

#### 1.4. 治験薬の対象疾患に対する治療効果・試験成績

治験調整医師らは、MPA にビグアナイド系糖尿病治療薬であるメトホルミンを併用・継続した前向き試験（第 II 相試験）を 2008 年 7 月～2014 年 12 月に実施した（UMIN 000002210）<sup>35</sup>。子宮内膜異型増殖症 17 例、子宮体癌 19 例に対し、MPA を 400mg/日を 6-9 か月投与した。病理学的完全奏効（pathological Complete Response: pCR）を病変消失（寛解）と定義し、pCR を確認したうえで MPA 治療期を終了した。メトホルミン併用は 750mg/日から開始し、750mg（1 ヶ月間）→1500mg（1 ヶ月間）→2250mg まで増量し継続維持。メトホルミンは妊娠が確認されるまで MPA 治療期終了後も継続投与した（維持療法期）。

寛解後 6 か月間は低用量ピルもしくは低用量黄体ホルモンで月経コントロールを行い、再発が無いことを確認し妊娠を許可した。妊娠希望の無い場合は月経コントロールを継続した。子宮内膜異型増殖症 17 例、子宮体癌 19 例が登録され、治療を終了した 36 例中 29 例（81%）が寛解した。寛解した 29 例のうち再発は 3 例（10%）に認めた（観察期間の中央値 38 か月（9 -66 か月））。組織型別にみると、子宮内膜異型増殖症は 17 例中 16 例寛解し再発は認めず、子宮体癌は 19 例中 13 例寛解、3 例再発している。千葉大学医学部附属病院で施行した MPA 単独療法をヒストリカルコントロールとして比較し、有意に再発率が低下していた。メトホルミン併用・継続により、治療開始時と比較してインスリン抵抗性を有意に改善した。登録例 36 例中 grade1-2 の下痢を 4 例 11%、grade 1-2 の悪心を 6 例 17%、grade 1 の肝機能異常を 3 例（8%）に認めた。grade 3 以上の有害事象や血栓症は 1 例も認めなかった。MPA 服用中に体重増加を認めることが多いが、メトホルミン併用により、grade 1 以上の体重増加は認めなかった。

若年性子宮体癌患者は肥満・インスリン抵抗性を有し、PCOS を背景にすることも多いため、メトホルミンは利にかなった薬剤と考えられる。

## 2. 治験の目的と必要性

### 2.1. 治験の目的と意義

本治験は、妊孕性温存を希望する子宮内膜異型増殖症及び IA 期子宮体癌に対し、MPA にメトホルミンを併用する新規治療法でのメトホルミンの適切な用量を検討することを主目的とする。MPA にメトホルミンを併用する治療法の有効性を、3 年無再発生存割合により評価する。有効性に加え、メトホルミン併用の安全性を有害事象発生割合で評価し、子宮体癌に対する最も適切な用量を決定する。

本治験によりメトホルミンの適切な用量が明らかになり、長期使用時の臨床的有用性が示されれば、より有効な標準治療が確立される。妊孕性温存療法の治療成績の改善は、妊娠を望む子宮体癌患者にとってのベネフィットは非常に大きい。子宮体癌に対するメトホルミンの治験は海外を含めこれまでに実施例がなく、本治験が世界に示す学術的なインパクトも大きい。さらに、少子高齢化が加速するわが国において、妊孕性温存療法の新たな治療法を確立することは、社会的な意義があると考えられる。

**【目的の設定根拠】**

治験調整医師が実施した第Ⅱ相臨床試験では、メトホルミン併用療法は標準的な治療法であるプロゲステロン療法と比較し十分に優れた結果を得た。メトホルミンの用量は最大 2250mg まで許容されたが、有害事象により減量した症例も存在したため、1500mg 以下での使用が適切と示唆された。しかし、750mg と 1500mg で有効性に差異があるかは明らかでなく、適切な用量は不明である。

以上より、本治験では、対照集団に対するメトホルミンの適切な用量を決定することが臨床上最も意義のある目的と判断した。

**2.2. 本治験参加により予想される利益**

メトホルミンは、肥満・インスリン抵抗性・耐糖能異常を有し糖尿病のリスクが高い症例に対し、糖尿病の予防効果が証明されている。また、メトホルミンは、PCOS における排卵誘発効果が証明されており、妊娠率改善効果が期待できる。また、メトホルミン併用により MPA 投与時の体重増加が抑制できる可能性がある。

治験参加者の治験期間中メトホルミンは無償で提供されるが、メトホルミンを除く薬剤費を含む診療費は、すべて患者の保険及び自費により負担される。患者が本治験に参加することで得られる特別な費用上の利益は、治験参加による負担軽減費以外にはない。

**2.3. 本治験参加により予想される不利益**

メトホルミンは、副作用が少ない薬剤だが、下痢・悪心などの消化器症状のほか、まれに乳酸アシドーシスなど重大な副作用の報告がある。メトホルミン服用による有害事象の発生が、治験に参加して生じるリスク・不利益である。

### 3. 本治験で用いる基準・定義

#### 3.1. 病期分類

病期分類は FIGO 国際進行期分類（2008 年）を用いる。

#### 3.2. 効果判定

「10.1. 効果判定とエンドポイントの定義」と同様とする。

- (1) CR：病理学的に子宮内膜異型増殖症・子宮体癌の消失を認めた場合。（病変が消失し、子宮内膜全面搔爬で組織が採取できず、細胞診異常も認めない場合は臨床的に CR と判断する。）
- (2) PR：子宮内膜異型増殖症・子宮体癌は残存しているが、治療に伴う腫瘍腺管の変性がうかがわれ、間質の脱落膜化変化などホルモン効果がある場合。判定困難な異型腺管の残存も PR と判断する。異型のない子宮内膜増殖症の存在は PR と判断する。
- (3) SD：間質の脱落膜化変化などホルモン効果を認めず、治療に伴う腫瘍腺管の変性もうかがわれないもの。
- (4) PD：脱分化など、悪性度の上昇が認められた場合。筋層浸潤・転移を疑う場合。なお、登録時の組織が子宮内膜異型増殖症で、経過中に高分化型類内膜癌と判断されても悪性度の上昇とは判断しない。

#### 3.3. 有害事象評価

有害事象評価には、NCI-CTCAE（Common Terminology Criteria for Adverse Events）v4.0 日本語訳 JCOG/JSCO 版を用いる。

#### 3.4. Performance Status (PS)

PS は ECOG の基準を用いる。

0：全く問題なく活動できる。発病前と同じ日常生活が制限なく行える。

1：肉体的に激しい活動は制限されるが、歩行可能で、軽作業や座っての作業は行うことができる。例：軽い家事、事務作業

2：歩行可能で自分の身の回りのことはすべて可能だが作業はできない。日中の 50%以上はベッド外で過ごす。

3：限られた自分の身の回りのことしかできない。日中の 50%以上をベッドか椅子で過ごす。

4：全く動けない。自分の身の回りのことは全くできない。完全にベッドか椅子で過ごす。

### 3.5. 子宮内膜精密検査

第Ⅱ期の規定来院時に実施する子宮内膜検査（試験掻爬術、吸引組織検査、セルブロックを用いた簡易組織診、細胞診）において、組織診で異常または細胞診で疑陽性以上の場合、4 週以内に実施する検査。例として、麻酔下の全面掻爬術や子宮鏡を用いた内膜検査が挙げられる。

## 4. 対象患者

### 4.1. 選択基準

- (1) 文書同意取得前 24 週（168 日）から登録前までに行った子宮内膜検査において、組織学的に子宮内膜異型増殖症もしくは高分化型類内膜癌の確定診断が得られている患者で、麻酔下の子宮内膜全面掻爬術により他の組織型癌が否定されている患者とする。子宮体癌症例は、文書同意取得前 8 週（56 日）から登録前までに行った CT・MRI・超音波検査で筋層浸潤・リンパ節転移・遠隔転移を認めない患者。
- (2) 子宮内膜異型増殖症もしくは高分化型類内膜癌に対する前治療歴（高用量黄体ホルモン療法、ミレーナ、化学療法）のない患者。月経調整目的のホルモン剤、低用量ピルの使用歴は可。
- (3) 同意取得時の年齢が、20 歳以上、42 歳以下である患者。
- (4) Performance status（PS）は ECOG の基準で 0 である患者。
- (5) 文書同意取得後、登録前 28 日以内の臨床検査値が、以下のすべてを満たす患者。
  - ① 白血球数 3,000/mm<sup>3</sup> 以上
  - ② 血小板数 10 X 10<sup>4</sup>/mm<sup>3</sup> 以上
  - ③ AST（GOT）施設基準値上限の 2 倍以下
  - ④ ALT（GPT）施設基準値上限の 2 倍以下
  - ⑤ 血清クレアチニン 1.0mg/dl 以下
  - ⑥ クレアチニンクリアランス（eGFR 可） 60mL/min 以上

- ⑦ 総ビリルビン 1.5mg/dl 以下
- ⑧ D-ダイマー 1.5µg/ml 以下
- (6) 本治験使用薬剤（MPA、メトホルミン）に対し過敏症の既往歴のない患者。
- (7) 文書同意取得後、登録前 28 日以内の心電図検査において臨床上問題となる異常所見が認められない患者。
- (8) 本治験参加について十分な説明を受けた後、十分な理解の上、患者本人から文書で同意が得られた患者。

**【設定根拠】**

- (1)～(3)：本治験の評価対象を適切に選択するため、妊孕性温存療法が適応となる対象とした。
- (4)～(7)：被験者の安全性を考慮して設定した。
- (8)：ヘルシンキ宣言の倫理的原則及び医薬品の臨床試験の実施基準（GCP）を遵守して治験を実施するため設定した。

**4.2. 除外基準**

- (1) 本治験使用薬剤（メトホルミン，MPA）に対し禁忌の患者。
  - ① 乳酸アシドーシスを起こしやすい患者。  
(乳酸アシドーシスの既往がある/中等度以上の腎機能障害/透析患者/重度の肝機能障害/ショック、心不全、心筋梗塞、肺塞栓等心血管系、肺機能に高度の障害のある患者及びその他の低酸素血症を伴いやすい状態/過度のアルコール摂取者/脱水者、脱水状態が懸念される下痢、嘔吐等の胃腸障害のある患者)
  - ② 重症ケトーシス、糖尿病性昏睡または前昏睡、I型糖尿病患者。
  - ③ 重症感染症、手術前後、重篤な外傷のある患者。
  - ④ 栄養不良状態、飢餓状態、衰弱状態、脳下垂体機能不全または副腎機能不全の患者。
  - ⑤ 妊婦または妊娠している可能性のある婦人。
  - ⑥ 治験薬（メトホルミン）の成分又はビグアナイド系薬剤に対し過敏症の既往歴のある患者。
  - ⑦ 血栓症を起こすおそれの高い患者。  
(手術後 1 週間以内の患者/脳梗塞、心筋梗塞、血栓静脈炎等の血栓性疾患又はその

既往歴のある患者/動脈硬化症の患者/心臓弁膜症、心房細動、心内膜炎、重篤な心不全の心疾患のある患者/ホルモン剤を投与されている患者)

- ⑧ 診断未確定の性器出血、尿路出血、乳房病変のある患者。
  - ⑨ 重篤な肝障害のある患者。
  - ⑩ 高カルシウム血症の患者。
- (2) 精神病または精神症状を合併しており、治験への参加が困難と判断される患者。
- (3) コントロール不良の糖尿病患者。
- (4) メトホルミンを含むビグアナイド系糖尿病治療薬を服用している糖尿病患者（食事・運動療法、ビグアナイド系以外の内服治療症例は可。）。
- (5) 活動性の重複癌を有する患者。
- (6) ステロイド剤の継続的な全身投与（内服または静脈内）をうけている患者。
- (7) その他、主治医が不適格と判断した患者。

#### 【設定根拠】

- (1)：薬剤の添付文書を参考に被験者の安全性を確保するために設定した。
- (2)～(7)：治験の評価に影響を与えられとされるため設定した。

## 5. 被験者の同意

### 5.1. 同意文書及びその他の説明文書の作成並びに改訂

治験責任医師は、被験者から治験参加の同意を得るために用いる同意文書及びその他の説明文書を可能な限り平易な表現で作成する。また、同意文書及びその他の説明文書を改訂する必要があると認めた場合は、これらを改訂する。

治験責任医師は、作成又は改訂された同意文書及びその他の説明文書を治験審査委員会に提出し、その承認を得る。

### 5.2. 同意取得の時期と方法

#### 1) 同意の取得

治験責任医師又は治験分担医師は、同意文書及びその他の説明文書を被験者に手渡し、

**5.3. 被験者に対する説明事項** に示す内容について十分な説明を行う。また、必要な場合には、治験協力者も被験者に補足的な説明を行う。被験者が治験の内容を良く理解したことを確認した上で、治験開始前（スクリーニング）検査を実施するまでに、自由意思に基づいた文書による同意を取得する。

## 2) 同意書への記入方法及び説明文書の交付

被験者の同意に際しては、説明を行った治験責任医師又は治験分担医師が記名捺印又は署名し、説明した日付を記入する。被験者は同意書に署名し、同意した日付を記入する。なお、治験協力者が補足的な説明を行った場合は、当該治験協力者も記名捺印又は署名し、説明した日付を記入する。同意を得た後、説明文書及び同意書の写しを被験者に交付する。

### 説明文書改訂時

治験責任医師又は治験分担医師は、被験者の同意に関連し得る新たな情報を得た場合、当該情報を速やかに被験者に伝え、治験に継続して参加するか否かについての意思を確認し、記録する。同意文書及びその他の説明文書を改訂した場合、被験者に対して改訂された同意文書及びその他の説明文書を用いて改めて説明し、治験への参加継続について文書で同意を取得する。

## 5.3. 被験者に対する説明事項

治験責任医師が作成する説明文書には、以下の事項を記載する。

- 1) 当該治験が研究を伴うこと
- 2) 治験の目的
- 3) 治験責任医師又は治験分担医師の氏名、職名及び連絡先
- 4) 治験の方法（治験の治験的側面、被験者の選択基準及び各投与群に割付けられる確率を含む）
- 5) 予期される臨床上的利益及び危険性又は不便
- 6) 被験者に対する他の治療方法の有無及びその治療方法に関して予測される重要な利益及び危険性
- 7) 被験者の治験への参加予定期間
- 8) 治験への参加は被験者の自由意思によるものであり、被験者は治験への参加を随時拒否又は撤回することができること。また、拒否・撤回によって被験者が不利な扱いを受けること、

- 治験に参加しない場合にうけるべき利益を失うことはないこと
- 9) モニター、監査担当者、治験審査委員会及び規制当局が医療に係る原資料を閲覧できること。  
その際、被験者の秘密は保全されること。また、同意文書に被験者が署名することによって  
閲覧を認めたことになること
- 10) 治験の結果が公表される場合であっても、被験者の秘密は保全されること
- 11) 被験者が治験及び被験者の権利に関してさらに情報がほしい場合又は臨床に関連する健康被害が生じた場合に照会すべき又は連絡をとるべき医療機関の相談窓口
- 12) 治験に関連する健康被害が発生した場合に被験者が受けることのできる補償及び治療
- 13) 治験に参加する予定の被験者数
- 14) 治験への参加の継続について被験者の意思に影響を与える可能性のある情報が得られた場合には速やかに被験者に伝えること
- 15) 治験への参加を中止させる場合の条件又は理由
- 16) 被験者が費用負担する必要がある場合にはその内容
- 17) 被験者に金銭等が支払われる場合にはその内容（支払額算定の取り決め等）
- 18) 被験者が守るべき事項
- 19) 当該治験の適否等について調査審議を行う治験審査委員会の種類、各治験審査委員会において調査審議を行う事項その他当該治験に係る治験審査委員会に関する事項

## 6. 治験の方法

### 6.1. 治験のデザイン

本治験は多施設共同、3用量群、オープン、ランダム化比較試験である。

#### 【治験デザインの設定根拠】

本治験のデザインは、メトホルミンを3用量群で比較するオープン試験とした。オープン試験とした理由は、治験薬投与により生じ得る有害事象に対し適切な措置を講じることができるようにするためである。

本治験の対象となる妊孕性温存療法適応の患者の発生頻度は年間約500例程度であることから、効率的に症例をリクルートするため、全国から経験豊富な施設を選定し、多施設共同試験として実施することとした。

対象患者に対する唯一の標準治療薬として、MPA が承認されている。MPA の投与期間は施設ごとに判断されるが、ガイドライン上 6 ヶ月の投与が一般的で、その後 1 年までの延長は許容されている。そのため、本治験における MPA 投与期間は 32 週（約 8 か月）とした。

メトホルミンの用量は、750mg（低用量）及び 1,500mg（高用量）と設定した。設定根拠は、次の通りである。本治験に先立って実施した単施設第 II 相臨床研究において、メトホルミン投与量を 2,250mg まで漸増したところ有害事象により減量を余儀なくされた症例が存在したことから、安全性を考慮して本治験における最大用量を 1,500mg とした。また、750mg 長期投与時の有効性に関するデータはなく、本治験において検討するため 750mg 投与群を設定した。

6.2. 治験のアウトライン

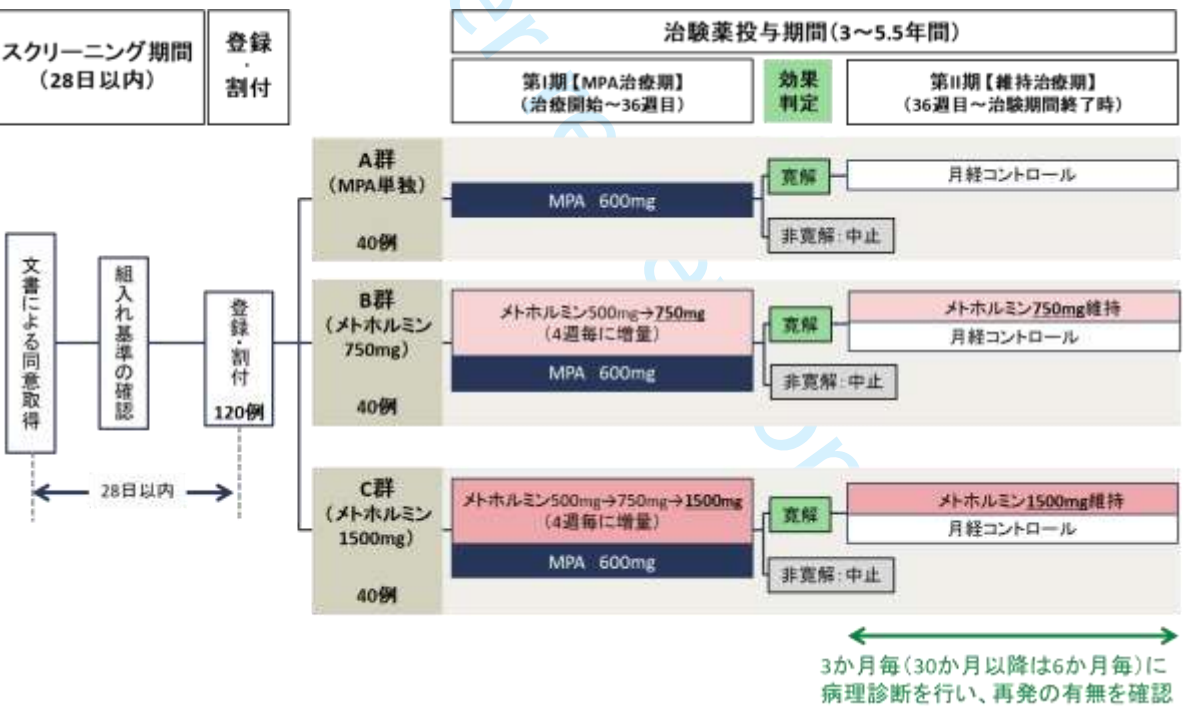

6.3. 目標被験者数と治験実施期間

目標被験者数：120 例（各群 40 例）

治験実施期間： 5.5 年（2019 年 7 月 1 日 - 2024 年 12 月 31 日）

症例登録期間： 2.5 年（2019 年 7 月 1 日 - 2021 年 12 月 31 日）

目標症例数は、「11.2. 目標症例数と設定根拠」を参照。

## 6.4. 施設登録及び症例登録・割付方法

施設登録及び症例登録は、千葉大学医学部附属病院 臨床試験部 データマネジメント室における中央登録制とする。施設登録が完了した施設から症例登録が可能となる。施設登録は FAX、症例登録は Web により、以下の手順で行う。

### 6.4.1. 施設登録

- 1) 各参加施設の治験責任医師は、当該施設の治験審査委員会等での承認が得られた後、治験審査委員会等の承認通知書の写し及び施設登録依頼書を施設登録センターに FAX により送付する。
- 2) 施設登録センターは施設登録を行い、施設登録完了通知書を治験責任医師に送付する。

FELICIA Trial 施設登録センター（千葉大学医学部附属病院 臨床試験部 DM 室）

受付 FAX 番号：043-222-1207

問合せ電話番号：043-222-1206

※受付時間は月～金の 9:00～17:00（土日、祝日、年末年始を除く。）

受付時間外に FAX を受信した場合は、翌稼働日の受付とする。

### 6.4.2. 症例登録・割付

- 1) 文書同意取得：治験責任医師または治験分担医師は、妊孕性温存療法を希望する子宮内膜異型増殖症・子宮体癌患者に対し、本治験の対象として該当する可能性がある場合に文書による同意を取得する。
- 2) 適格性の確認：治験責任医師または治験分担医師は、患者から同意を取得した後、登録前のスクリーニング検査を施行する。選択基準に合致していること及び除外基準に抵触しないか確認する。
- 3) 登録・割付：治験責任医師または治験分担医師は対象患者が選択基準をすべて満たし、除外基準のいずれにも該当しないことを確認した後、治験責任医師または治験分担医師、治験協力者は下記の Web サイトにアクセスし、症例登録のページに必要な情報を入力し、

症例登録を行う。詳細は別途作成する被験者症例登録入力マニュアルを参照する。なお、症例登録は同意取得後 28 日以内に行う。症例登録に必要な情報を入力後、割付を行う。割付結果は、症例登録 Web 画面に表示される。治験責任医師または治験分担医師は、割付結果に従いプロトコル治療を開始する。

一度登録された患者は登録取り消し（データベースから抹消）はなされない。重複登録の場合は、いかなる場合も初回の登録情報（登録番号）・割付群を採用する。治験責任医師または治験分担医師は誤登録・重複登録が判明した際には速やかに症例登録センターに連絡する。

※ 治験責任医師又は治験分担医師は、被験者の登録・割付がなされるまで治験薬を処方・投与してはならない。

FELICIA Trial 症例登録 Web サイト（DATATRAK ONE）

URL : <https://secure.datatrak.net>

問合せ電話番号 : 043-222-1206

※ 土日祝を含む 365 日、24 時間受付可能（保守点検等によるシステム停止時間を除く。）

6.4.3. 割付調整因子

割付調整因子は、組織型（子宮内膜異型増殖症、子宮体癌）、BMI（25 以上、25 未満）、婚姻状態（既婚、未婚）とする。組織型は各施設で判断する。

なお、治験薬への割付は、動的割付とする。

6.4.4. 登録例の中央病理診断

中央病理診断は、別途作成する手順書に従い施行する。中央病理診断の対象となる標本は、MPA 治療期（第 I 期の登録時、8 週、16 週、24 週、32 週）、再発が疑われた際に実施された病理検査の標本、及び第 II 期の 120 週（3 年無再発生存確認時）に採取した標本（細胞診標本もしくは組織標本）である。第 I 期（登録時、8 週、16 週、24 週、32 週）の標本は寛解判定後にまとめて治験調整事務局へ送付する。

中央判定委員会は盲検化された 3 名の独立した委員により構成され、各委員がバーチャルスライドにより標本をレビューして中央病理診断とする。

実施医療機関の判定と中央病理診断が不一致の場合、下記のように対応する。

- (1) 中央病理診断で、子宮内膜異型増殖症および高分化型類内膜癌以外の組織型の場合は解析から除外する。
- (2) 組織型は、中央判定結果に従い解析する。

## 6.5. 登録されなかった被験者の取り扱い

同意取得後、不適格などの何らかの理由で登録が行われなかった場合は、登録されなかった被験者となり、治験の症例には含めない。ただし、スクリーニング期間内であれば再検査を許容する。治験責任医師又は治験分担医師は、当該被験者に本治験への登録が不可である旨を説明する。

## 6.6. 投与スケジュール及び投与量・投与方法

【メトホルミン非投与群：A 群（MPA のみ）】

### ➤ 第Ⅰ期

#### 第Ⅰ期の治療法

- 併用薬（MPA）は初回処方日（0 週 Day-1）の翌日から服用開始する。初回処方日の翌日を治療期の開始日（Day1）と定義する。0 週 Day-1 の来院は、原則として登録後 14 日以内とする。
- MPA の服用量は 1 日 600mg とし、36 週来院時（寛解判定日）まで服用する。
- MPA 服用中は血栓予防を目的として低用量アスピリンの併用を許容する。

#### 経過観察と効果判定

- 第Ⅰ期は 4 週毎に外来経過観察を行う。8 週毎に麻酔下全面搔爬術による子宮内膜組織診を施行し、効果判定を行なう。
- 効果判定は搔爬術施行後初回の外来までに行なうこととし、規定来院の許容範囲を超えない事とする。判定結果が出るまで MPA の投与を継続する。32 週時点の効果判定〔寛解判定〕は 4 週以内に行うこととする。
- 32 週時に CR が得られた症例を寛解とし、第Ⅱ期の治療に移行する。
- 32 週時に CR が得られない症例は非寛解として治験中止とする。

➤ 第Ⅱ期

第Ⅱ期の治療法

- 妊娠を希望しない症例は、原則治験完了まで月経コントロールを施行する（**6.11. 併用薬・併用療法** 参照）。
- 挙児希望症例に対しては直ちに妊娠を許可する。ただし一定期間月経コントロールを行うかどうかは施設ごとの判断で行う。
- 挙児希望症例はなるべく不妊治療を行い、短期間での妊娠をめざす。

【メトホルミン 750mg 群：B 群（MPA＋メトホルミン 750mg/day）】

➤ 第Ⅰ期

第Ⅰ期の治療法

- MPA は、1 日 600mg を 36 週来院時（寛解判定日）まで投与する。
- MPA は治験薬（メトホルミン）と同時に服用開始する。
- MPA 服用中は血栓予防を目的として低用量アスピリンの併用を許容する。

治験薬の投与

- 治験薬（メトホルミン）は初回処方日（0 週 Day-1）の翌日から服用開始する。初回処方日の翌日を治療期の開始日（Day1）と定義する。0 週 Day-1 の来院は、原則として登録後 14 日以内とする。
- メトホルミンの初回投与は 500mg（250mg×2、分 2）とする。
- メトホルミン開始 4 週間の経過観察後に、**6.7.3. 増量基準**に従い、750mg（250mg×3、分 3）に増量する。
- 以後、**6.7. 減量・休薬基準**に従い、適切に減量、休薬を行なう。ただし、最大投与量を 750mg とする。
- 全面掻爬術施行時は、当日のメトホルミン服用は中断する。

| 用量調整段階 | 1 日服用量 | 1 回服用量 | 1 日の服用回数 |
|--------|--------|--------|----------|
| 1 段階   | 500mg  | 250mg  | 2 回      |
| 2 段階   | 750mg  | 250mg  | 3 回      |

## 経過観察と効果判定

- 第Ⅰ期は4週毎に外来経過観察を行う。8週毎に麻酔下全面掻爬術による子宮内膜組織診を施行し、効果判定を行なう。
- 効果判定は掻爬術施行後初回の外来までに行なうこととし、規定来院の許容範囲を超えない事とする。判定結果が出るまでMPAとメトホルミンの投与を継続する。32週時点の効果判定〔寛解判定〕は4週以内に行うこととする。
- 32週時にCRが得られた症例を寛解とし、第Ⅱ期の治療に移行する。
- 32週時にCRが得られない症例は非寛解として治験中止とする。

### ➤ 第Ⅱ期

#### 第Ⅱ期の治療法

- 第Ⅰ期36週来院時に寛解判定が得られた症例では、MPAの投与を終了し、メトホルミンのみ投与を継続する。
- 最大投与量を750mgとし、**6.7. 減量・休薬基準**に従い適切に減量、休薬を行なう。
- 妊娠を希望しない症例は、原則治験完了まで月経コントロールを施行する（**6.11. 併用薬・併用療法** 参照）。
- 挙児希望症例に対しては直ちに妊娠を許可する。ただし一定期間月経コントロールを行うかどうかは施設ごとの判断で行う。
- 挙児希望症例はなるべく不妊治療を行い、短期間での妊娠をめざす。

#### 【メトホルミン 1500mg 群：C 群（MPA+メトホルミン 1500mg/day）】

### ➤ 第Ⅰ期

#### 第Ⅰ期の治療法

- MPAは、1日600mgを36週来院時（寛解判定日）まで投与する。
- MPAは治験薬（メトホルミン）と同時に服用開始する。
- MPA服用中は血栓予防を目的として低用量アスピリンの併用を許容する。

#### 治験薬の投与

- 治験薬（メトホルミン）は初回処方日（0週 Day-1）の翌日から服用開始する。初回処

1  
2  
3  
4  
5  
6  
7  
8  
9  
10  
11  
12  
13  
14  
15  
16  
17  
18  
19  
20  
21  
22  
23  
24  
25  
26  
27  
28  
29  
30  
31  
32  
33  
34  
35  
36  
37  
38  
39  
40  
41  
42  
43  
44  
45  
46  
47  
48  
49  
50  
51  
52  
53  
54  
55  
56  
57  
58  
59  
60

方日の翌日を治療期の開始日（Day1）と定義する。0 週 Day-1 の来院は、原則として登録後 14 日以内とする。

- メトホルミンの初回投与は 500mg（250mg×2、分 2）とする。
- メトホルミン開始 4 週後に、**6.7.3. 増量基準**に従い、4 週毎に 1500mg まで漸増する。増量は 500mg（250mg×2、分 2）→750mg（250mg×3、分 3）→1500mg（250mg×6、分 3）とする。
- 以後、**6.7. 減量・休薬基準**に従い、適切に減量、休薬を行なう。ただし、最大投与量を 1500mg とする。
- 全面掻爬術施行時は、当日のメトホルミン服用は中断する。

| 用量調整段階 | 1 日服用量 | 1 回服用量 | 1 日の服用回数 |
|--------|--------|--------|----------|
| 1 段階   | 500mg  | 250mg  | 2 回      |
| 2 段階   | 750mg  | 250mg  | 3 回      |
| 3 段階   | 1500mg | 500mg  | 3 回      |

経過観察と効果判定

- 第Ⅰ期は 4 週毎に外来経過観察を行う。8 週毎に麻酔下全面掻爬術による子宮内膜組織診を施行し、効果判定を行なう。
- 効果判定は掻爬術施行後初回の外来までに行なうこととし、規定来院の許容範囲を超えない事とする。判定結果が出るまで MPA とメトホルミンの投与を継続する。32 週時点の効果判定〔寛解判定〕は 4 週以内に行うこととする。
- 32 週時に CR が得られた症例を寛解とし、第Ⅱ期の治療に移行する。
- 32 週時に CR が得られない症例は非寛解として治験治療を中止する。

➤ 第Ⅱ期

第Ⅱ期の治療法

- 第Ⅰ期 36 週来院時に寛解判定が得られた症例では、MPA の投与を終了し、メトホルミンのみ投与を継続する。
- 最大投与量を 1500mg とし、**6.7. 減量・休薬基準**に従い適切に減量、休薬を行なう。
- 妊娠を希望しない症例は、原則治験完了まで月経コントロールを施行する（**6.11. 併用**

薬・併用療法 参照)。

- 挙児希望症例に対しては直ちに妊娠を許可する。ただし一定期間月経コントロールを行うかどうかは施設ごとの判断で行う。
- 挙児希望症例はなるべく不妊治療を行い、短期間での妊娠をめざす。

## 6.7. 治験薬及び併用薬の減量・休薬基準

治験責任医師又は治験分担医師は有害事象の発現時や検査実施時に減量・休薬の必要性を判断し、適宜減量・休薬を行うことができるものとする。本治験で特に定める減量・休薬基準は以下の通りとし、表に従う。

### 6.7.1. 第Ⅰ期における MPA 及びメトホルミンの減量・休薬・再開・中止基準

第Ⅰ期において、下記に示す有害事象、臨床検査値異常等が発生した場合、治験責任医師及び治験分担医師は下表に従い減量・休薬し、改善が認められた場合は治験薬投与を再開する。

- 下表に示す有害事象が出現した場合は、記載に従い休薬し、症状や検査値の改善を認めた後に再開する。
- MPA の休薬期間は、連続最長 4 週間とする。
- メトホルミンの休薬期間は、MPA と同時に休薬する場合もあり、第Ⅰ期では連続最長 8 週間までとする。
- 有害事象の改善確認は、被験者の状態に応じて適宜実施する。MPA・メトホルミンそれぞれ決められた連続休薬期間を超える場合は治験中止とする。
- メトホルミンによる悪心・嘔吐・下痢は高頻度だが、休薬により直ちに改善するが多い。投与中の一過性の症状の場合、被験者の判断で休薬、再開は可能とするが、症状が持続する場合は休薬とする（1 日基準を超えても、被験者の判断で 1 日休薬するのみで改善していれば継続可能）。一時的な休薬の場合、服薬コンプライアンスが低下しないように注意する。
- メトホルミン投与開始直後や増量直後は、消化器症状（下痢、悪心、腹部膨満、食欲不振など）が起こることが多く、服用続けるうちに軽減することが多いことを、被験者に説明しておく。症状が持続する場合は適切に有害事象・合併症の対症療法を行う（6.11.2 参照）。

| 判断基準                                                                                                                                                                                           | A 群(MPA)                                                                                                                                                                                | B,C 群(MPA・メトホルミン)                                                                                                                                                                                                                                                                                                 |
|------------------------------------------------------------------------------------------------------------------------------------------------------------------------------------------------|-----------------------------------------------------------------------------------------------------------------------------------------------------------------------------------------|-------------------------------------------------------------------------------------------------------------------------------------------------------------------------------------------------------------------------------------------------------------------------------------------------------------------|
| <p>(1) 臨床検査値異常</p> <ul style="list-style-type: none"> <li>AST(GOT)及び ALT(GPT) 施設基準値上限の 2.5 倍以上</li> <li>総ビリルビン 2.0mg/dl 以上</li> <li>血清クレアチニン 1.2 mg/dl 以上</li> <li>eGFR 60mL/min 未満</li> </ul> | <p><b>MPA を休薬する。</b><br/>検査結果が左記中止基準以下に改善したことを確認したのち、<b>400mg に減量して再開する。</b><br/>再開後、再度左記中止基準となった場合は<b>治験中止</b>とする。<br/>なお、再開後、600mg への増量はしない。</p>                                      | <p><b>MPA 及びメトホルミンを休薬する。</b><br/>検査結果が左記休薬基準以下に改善したことを確認したのち、まず <b>MPA を 400mg に減量して再開する。</b>再開後に左記基準を超える場合は、<b>治験中止</b>とする。<br/>なお、再開後、MPA は 600mg へ増量しない。</p> <p>MPA を 400mg で再開後、左記基準を超えない場合は<b>メトホルミンを一段階減量して再開する</b>(メトホルミンの再開・中止基準は 6.7.2 表(1)参照)。<br/>500 mg 投与時に休薬した場合は、500 mg で再開する。また、一段階減量後は増量しない。</p> |
| <p>(2) grade 1 以上の嘔吐が持続<br/>grade 2 以上の悪心・下痢が持続</p>                                                                                                                                            | <p><b>MPA を休薬する。</b><br/>休薬後、対症療法を施行し、grade1 以下に改善後 MPA を再開する。再開できると判断された場合、MPA を <b>400mg に減量して再開</b>する。減量再開後も事象が継続し、MPA 服用困難と医師が判断した場合は<b>治験中止</b>とする。<br/>なお、再開後、600mg への増量はしない。</p> | <p><b>メトホルミンのみ休薬する。</b><br/>メトホルミンによる有害事象の場合が多いため、まずメトホルミンの再開・中止基準に従う。(6.7.2 表(2)参照)</p> <p>メトホルミンを休薬しても改善しない場合は、MPA の有害事象と考え、左記基準で MPA の休薬、再開、中止を判断する。<br/>MPA が投与可能な場合、<b>メトホルミンを元の投与量で再開する。</b>再開後の対応は 6.7.2.表(2)に従う。</p>                                                                                      |
| <p>(3)胃腸症状、倦怠感、筋肉痛、過呼吸等の症状が急激に発現し乳酸アシドーシスを強く疑う場合</p>                                                                                                                                           |                                                                                                                                                                                         | <p><b>メトホルミンを休薬する。</b><br/>休薬後、直ちに血液ガス分析を施行し、確定診断を行う。<br/>乳酸アシドーシスが否定されれば、症状改善後メトホルミンを同量で<b>再開する。</b>(メトホルミンの再開・中止基準は 6.7.2 表(3)参照)。</p>                                                                                                                                                                          |
| <p>(4) D-ダイマー 1.5µg/ml を超える</p>                                                                                                                                                                | <p><b>血栓スクリーニング</b>を施行する。<br/>スクリーニングにより血栓を認めた場合は<b>治験中止</b>とする。血栓を認めない場合は継続し、脳梗塞、心筋梗塞、肺塞栓症、腸間膜血栓症、網膜血栓症、血栓性静脈炎等の症状やこれらの初期症状が現れたらただちに<b>治験中止</b>とする。</p>                                |                                                                                                                                                                                                                                                                                                                   |

| 判断基準                                                                                                                                                                  | A群(MPA) | B,C群(MPA・メトホルミン)                                                                                                                     |
|-----------------------------------------------------------------------------------------------------------------------------------------------------------------------|---------|--------------------------------------------------------------------------------------------------------------------------------------|
| (5) 7.4.に記載のMPAによる重大な副作用の出現                                                                                                                                           | 治験中止    |                                                                                                                                      |
| (6) 7.1.に記載のメトホルミンによる重大な副作用の出現                                                                                                                                        |         | 治験中止                                                                                                                                 |
| (7)メトホルミン禁忌・慎重投与および基本的注意事項に該当する以下の場合。<br>・発熱・下痢・嘔吐・食事摂取不良等で脱感染症や発熱を認め、脱水が懸念される場合<br>・重症感染症・手術前後・重篤な外傷（禁忌）<br>・激しい筋肉運動をした場合<br>・過度のアルコール摂取（禁忌）<br>・ヨード造影剤を用いた検査時（慎重投与） |         | <b>メトホルミンを休薬する。</b><br>休薬後、左記臨床症状の改善を確認したのち <b>同量で再開する。</b><br>※ヨード造影剤を用いた検査時は、緊急の場合を除き、ヨード造影剤の投与前から <b>投与後 48 時間まで、メトホルミンを休薬する。</b> |

#### 6.7.2. 第Ⅱ期におけるメトホルミンの減量・休薬・再開・中止基準 (B,C 群)

第Ⅱ期において、下記に示す有害事象、臨床検査値異常等が発生した場合、治験責任医師及び治験分担医師は下表に従い速やかに減量あるいは休薬（最大連続4週間）し、改善が認められた場合は治験薬投与を再開する。

- 改善確認は被験者の状態に応じて適宜実施し、MPA、メトホルミンそれぞれに決められた連続休薬期間を超える場合は、治験中止とする。
- メトホルミンによる悪心・嘔吐・下痢は高頻度だが、休薬により直ちに改善する場合が多い。投与中の一過性の症状の場合、被験者の判断で休薬、再開は可能とするが、症状持続する場合は休薬とする。一時的な休薬の場合、服薬コンプライアンスが低下しないように注意する。
- 第Ⅱ期に新たに上記有害事象が生じた場合は、第Ⅱ期に服用開始した併用薬による有害事象の可能性が考えられる（月経コントロール目的の低用量・中用量卵胞ホルモン・黄体ホルモン配合剤など）。まず、新たに併用した薬剤の中止を検討し事象が継続する場合は基準に従い対応する。

| 判断基準                                                                                                                                                                        | 500mg 投与時                                                                                                                  | 750mg 投与時                                                                                     | 1500mg 投与時                                                     |
|-----------------------------------------------------------------------------------------------------------------------------------------------------------------------------|----------------------------------------------------------------------------------------------------------------------------|-----------------------------------------------------------------------------------------------|----------------------------------------------------------------|
| (1) 臨床検査値異常<br>• AST(GOT)及び ALT(GPT)<br>施設基準値上限の 2.5 倍以上<br>• 総ビリルビン 2.0mg/dl 以上<br>• 血清クレアチニン 1.2 mg/dl 以上<br>• eGFR 60mL/min 未満                                           | 治験中止                                                                                                                       | メトホルミンを休薬する。<br>休薬後、臨床検査異常の改善を確認したのち、500mg で再開する。<br>500mg まで減量しても異常が継続する場合は治験中止とする。          | メトホルミンを休薬する。<br>休薬後、臨床検査異常の改善を確認したのち、750mg で再開する。              |
| (2) grade1 以上の嘔吐が持続<br>grade 2 以上の悪心・下痢が持続                                                                                                                                  | 治験中止                                                                                                                       | メトホルミンを休薬する。<br>休薬後、対症療法を施行し、grade1 以下に改善を確認した場合は 500mg で再開する。500mg まで減量しても症状が継続する場合は治験中止とする。 | メトホルミンを休薬する。<br>休薬後、対症療法を施行し、grade1 以下に改善を確認した場合は 750mg で再開する。 |
| (3) 胃腸症状、倦怠感、筋肉痛、過呼吸等の症状が急激に発現し乳酸アシドーシスを強く疑う場合                                                                                                                              | メトホルミンを休薬する。<br>休薬後、直ちに血液ガス分析を施行し確定診断を行う。<br>乳酸アシドーシスを認めた場合は治験中止とする。乳酸アシドーシスが否定されれば症状改善後に同量で再開する。再開後も左記症状が出現した場合は、治験中止とする。 |                                                                                               |                                                                |
| (4) 7.1.に記載のメトホルミンによる重大な副作用の出現                                                                                                                                              | 治験中止                                                                                                                       |                                                                                               |                                                                |
| (5) メトホルミン禁忌・慎重投与および基本的注意事項に該当する以下の場合。<br>• 発熱・下痢・嘔吐・食事摂取不良等で脱感染症や発熱を認め、脱水が懸念される場合<br>• 重症感染症・手術前後・重篤な外傷（禁忌）<br>• 激しい筋肉運動をした場合<br>• 過度のアルコール摂取（禁忌）<br>• ヨード造影剤を用いた検査時（慎重投与） | メトホルミンを休薬する。<br>休薬後、左記臨床症状の改善を確認したのち同量で再開する。<br>※ヨード造影剤を用いた検査時は、緊急の場合を除き、ヨード造影剤の投与前から投与後 48 時間まで、メトホルミンを休薬する。              |                                                                                               |                                                                |
| (6) 妊娠の可能性がある場合                                                                                                                                                             | メトホルミンを休薬する。                                                                                                               |                                                                                               |                                                                |

|  |                                                                                                                                                                                        |
|--|----------------------------------------------------------------------------------------------------------------------------------------------------------------------------------------|
|  | <p>妊娠の可能性がある場合は直ちにメトホルミンを休薬し治験責任医師又は治験分担医師へ連絡。直ちに妊娠の有無を確認。</p> <p>妊娠していなかった場合は服用再開、妊娠が判明した場合は休薬を続ける。</p> <p>流産あるいは死産を認めた場合、8週以内にメトホルミンの服用を再開する。再開時は初回投与量から増量基準に従い増量し、休薬前の投与量で維持する。</p> |
|--|----------------------------------------------------------------------------------------------------------------------------------------------------------------------------------------|

### 6.7.3. メトホルミンの増量基準

第Ⅰ期のメトホルミン漸増の際、下記に該当する場合にメトホルミンを増量する。また、有害事象によるメトホルミン減量後は増量せず、減量後の用量を維持する。

- 6.7.1.に記載の減量休薬基準が出現しない場合
- Grade1 の倦怠感・悪心・下痢は対症療法施行し増量可。ただし、担当医の判断で増量は困難と判断した場合は同用量で継続する。

### 有害事象 grade の判断基準

有害事象が発生した際の grade について、下表を参照する。

|     | grade1                                               | grade2                                                |
|-----|------------------------------------------------------|-------------------------------------------------------|
| 悪心  | 摂食習慣に影響のない食欲低下                                       | 顕著な体重減少、脱水または栄養失調を伴わない経口摂取量の減少                        |
| 嘔吐  | 24 時間に 1-2 エピソードの嘔吐 (5 分以上間隔が開いたものを、それぞれ 1 エピソードとする) | 24 時間に 3-5 エピソードの嘔吐 (5 分以上間隔が開いたものを、それぞれ 1 エピソードとする)  |
| 下痢  | ベースラインと比べて <4 回/日の排便回数増加：ベースラインと比べて人工肛門からの排泄量が軽度増加   | ベースラインと比べて 4-6 回/日の排便回数増加：ベースラインと比べて人工肛門からの排泄量が中等度に増加 |
| 倦怠感 | だるさ、または元気がない                                         | だるさ、または元気がない；身の回り以外の日常生活動作の制限                         |

### 6.8. 妊娠の可能性・妊娠が判明した場合の取扱い

本治験では、第Ⅱ期に移行した被験者について妊娠を許容する。妊娠の可能性がある場合は、当該被験者は直ちに治験責任医師又は治験分担医師へ連絡することとしメトホルミンを休薬する。妊娠が確定したら休薬を継続するが、妊娠が否定された場合は直ちにメトホルミンを再開する。妊娠の判定は治験実施医療機関以外の医療機関で行ってもよい。

なお、流産、死産並びに子の先天異常等を認めた場合は、有害事象として扱い、**9.5.2. 重篤な有害事象の報告手順**に従い報告を行うものとする。

- 1) 妊娠確認後、妊娠 22 週以降の生児を獲得した場合は、妊孕性温存療法の真の目的を達成したと判断し、分娩後の 8 週以内に完了時検査を施行し治験を終了する。
- 2) 本治験対象者は、妊娠成立後も一定頻度流産・死産を認めると想定される。流産・死産となった場合は、流産・死産の処置後経過順調なことを確認し、8 週以内にメトホルミンの服用を再開する。不妊治療を継続しない場合は、原則として月経コントロールを併用する。
- 3) 流産・死産後に再開する場合、経過観察は寛解後の最も近い経過観察スケジュールに従う。

## 6.9. 個々の症例の完了・中止基準

### 6.9.1. 完了基準

個々の被験者の完了は、最終被験者における治験薬投与開始日（第 I 期 Day1）を起点として、156 週後（第 II 期の 120 週時に相当）に最も近い規定検査時とする。治験完了時検査は原則として、最終被験者の 156 週後を超えないこととする。ただし、最終被験者の 156 週後の時点で第 II 期 120 週時を超えていない場合はこの限りではなく、当該被験者の第 II 期 120 週時検査を治験完了時検査とみなす。また、最終被験者がその後治験中止に至った場合でも、各被験者の完了時期は変更しない。

妊娠し 22 週以降の生児を獲得した場合は、分娩後 8 週以内に完了時の検査を施行し治験を終了する。治験終了時に妊娠中の被験者は、最後に経過観察を行った日のデータを完了時検査とし、治験完了とする。

### 6.9.2. 中止基準

以下の基準に該当した場合、治験責任医師又は治験分担医師は治験を中止し、規定の中止時検査を行う。

- 1) I 期において、以下に該当し MPA 療法が奏効しない場合。
  - 悪性度の上昇など、PD が疑われた場合
  - 16 週時の病理検査で癌が残存しホルモン効果が認められない(SD)の場合
  - 32 週時の病理検査で CR が得られない場合

- 2) 一旦寛解（32 週時効果判定）後、子宮内膜異型増殖症・子宮内膜癌の再発を認めた場合。
- 3) 治験薬を最終段階まで減量しても有害事象が発現し、かつ治験責任医師又は治験分担医師が中止を必要と認めた場合。
- 4) 有害事象、臨床検査値異常が 4 週間休薬後も投与基準まで改善しない場合。
- 5) ステロイドの長期投与により全身に影響があると医師が判断した場合。
- 6) MPA 及びメトホルミンの投与継続が困難な有害事象が発現し、かつ治験責任医師又は治験分担医師が中止を必要と認めた場合。
- 7) 合併症などにより、治験責任医師又は治験分担医師が中止を必要と認めた場合。
- 8) 被験者からの中止の申し出があった場合。
- 9) その他、治験責任医師又は治験分担医師が被験者の治験継続が不可能と判断した場合。
- 10) 治験調整医師または治験調整委員会が中止の決定を判断した場合。

なお、治験が中止された場合の「中止日」は、中止の理由となる事象が発現した日ではなく、治験責任医師又は治験分担医師が中止と判断した日とする。

ただし、1) 及び 2) について、施設判断で寛解・非再発としたが中央判定で非寛解・再発と判断された場合は、中央判定結果を速やかに担当医師に連絡し、担当医師が中止と判断した日を中止日とする。

## 6.10. 服薬状況調査の報告

担当医師は全ての被験者について来院ごとに MPA 及びメトホルミンの服薬状況（服薬コンプライアンス）を調査し、EDC に入力する。処方投与量、服薬コンプライアンス、服用中止の場合は中止日を確認する。

服薬コンプライアンスは以下の通り確認する。

MPA は 1 日 2 錠（400mg）以上服用していれば、服用ありと判断する。

メトホルミンは、500mg 処方された場合は 500mg、750mg 処方された場合は 500mg 以上、1500mg 処方された場合は 750mg 以上服用していれば服用ありと判断する。

来院ごとに、前来院日から来院前日までの服用すべき日数\*を 100%とし、服用ありの日数の割合（%）を記録する。

\* 医師の判断を伴う休薬の場合（妊娠期間を含む）は、服用あり・なしの判断の計算に含めない。

## 6.11. 併用薬・併用療法

### 6.11.1. 情報収集する併用薬・併用療法

以下の併用療法に関してデータを収集する。

- (1) 血栓予防のために使用した低用量アスピリン
- (2) 第Ⅱ期に月経コントロールに使用した薬剤

月経コントロールは Holmstrom 療法と規定する。Holmstrom 療法は、MPA 10-15mg/日（1 日 2~3 回に分割）を 14 日服用、14 日休薬の周期投与で行う。（新たな有害事象の懸念があるため、第Ⅰ期に使用した MPA による月経コントロールを行う）

ただし、第 2 度無月経のため、黄体ホルモン単独で消退出血を認めない場合は、低・中用量ピルによる月経コントロールも許容する。

- (3) 糖尿病・高脂血症の治療に使用した薬剤
- (4) 有害事象に対する処置及び使用した薬剤
- (5) 有害事象の原因となった薬剤
- (6) 併用禁止薬

### 6.11.2. 有害事象・合併症の対症療法

- (1) 下痢の対症療法

下痢を認める場合は、プロバイオティクス（ミヤ BM, ビオフェルミン等）を併用する。塩酸ロペラミド(ロペミンカプセル 1mg)も服用可とする。

- (2) 悪心・嘔吐・上部消化器症状の対症療法

悪心・嘔吐の軽減を目的とした制吐剤の予防的・治療的投与は可能である。また、胃潰瘍、慢性胃炎などに対して H2 ブロッカー、プロトンポンプ阻害剤の服用可とする。

- (3) 高脂血症・軽度肝機能障害時

肥満例では、高脂血症や脂肪肝で肝機能異常を認める場合があるが、高脂血症薬の投与は許容する。脂肪肝と診断され、治療開始時に投与基準内の軽度肝機能異常、高脂血症を認める場合は、高脂血症薬、肝保護剤の服用を検討する。

## 6.12. 併用禁止薬・併用禁止療法

本治験に参加中は、評価に影響を及ぼすと考えられる抗腫瘍効果を期待した治療の併用は認めない。

- 他の抗悪性腫瘍薬
- 他のホルモン療法
- 免疫療法
- 放射線療法
- 手術療法（子宮摘出をした場合は、治験中止）
- 治験薬以外のビグアナイド系糖尿病治療薬
- 長期投与により全身に影響があると判断されるステロイド剤

## 6.13. 治験終了後の後治療

病理学的再発を認めた後の治療や、治験終了・中止後の後治療は特に規定しない。

# 7. 治験薬

## 7.1. 治験薬の概要

治験薬の詳細及び取り扱いに関しては、治験薬概要書を参照する。本治験で使用する治験薬は以下のとおりである。

|       |                 |                 |
|-------|-----------------|-----------------|
| 一般名   | メトホルミン塩酸塩       |                 |
| 成分・含量 | 有効成分            | メトホルミン塩酸塩 250mg |
| 剤型    | 白色円形フィルムコーティング錠 |                 |

|       |                                                                                                                                                                                                                                                                                                                                                                                                                                                                                                                                                                                              |                                                                                     |
|-------|----------------------------------------------------------------------------------------------------------------------------------------------------------------------------------------------------------------------------------------------------------------------------------------------------------------------------------------------------------------------------------------------------------------------------------------------------------------------------------------------------------------------------------------------------------------------------------------------|-------------------------------------------------------------------------------------|
|       | 添加物                                                                                                                                                                                                                                                                                                                                                                                                                                                                                                                                                                                          | D-マンニトール<br>トウモロコシデンプン<br>ヒプロメロース<br>ステアリン酸マグネシウム<br>プロピレングリコール<br>酸化チタン<br>カルナウバロウ |
| 保存条件  | 気密容器、室温保存                                                                                                                                                                                                                                                                                                                                                                                                                                                                                                                                                                                    |                                                                                     |
| 効能・効果 | 2 型糖尿病<br>ただし、下記のいずれかの治療で十分な効果が得られない場合に限る。<br>(1) 食事療法・運動療法のみ<br>(2) 食事療法・運動療法に加えてスルホニルウレア剤を使用                                                                                                                                                                                                                                                                                                                                                                                                                                                                                               |                                                                                     |
| 用法・用量 | 通常、成人にはメトホルミン塩酸塩として 1 日量 500mg より開始し、1 日 2 ～3 回食後に分割経口投与する。維持量は効果を観察しながら決めるが、1 日最高投与量は 750mg とする。                                                                                                                                                                                                                                                                                                                                                                                                                                                                                            |                                                                                     |
| 禁忌    | <ol style="list-style-type: none"> <li>1. 乳酸アシドーシスを起こしやすい状態の患者 <ol style="list-style-type: none"> <li>(1) 乳酸アシドーシスの既往</li> <li>(2) 腎機能障害（軽度障害も含む）</li> <li>(3) 透析患者（腹膜透析も含む）</li> <li>(4) 肝機能障害</li> <li>(5) ショック、心不全、心筋梗塞、肺塞栓など心血管系、肺機能に高度の障害のある患者及びその他の低酸素血症を伴いやすい状態</li> <li>(6) 過度のアルコール摂取者</li> <li>(7) 脱水症、脱水状態が懸念される下痢、嘔吐等の胃腸障害のある患者</li> <li>(8) 高齢者</li> </ol> </li> <li>2. 重症ケトosis、糖尿病性昏睡又は前昏睡、1 型糖尿病の患者</li> <li>3. 重症感染症、手術前後、重篤な外傷のある患者</li> <li>4. 栄養不良状態、飢餓状態、衰弱状態、脳下垂体機能不全又は副腎機能不全の患者</li> <li>5. 妊婦又は妊娠している可能性のある婦人</li> <li>6. 本剤の成分又はビグアナイド系薬剤に対し過敏症の既往歴のある患者</li> </ol> |                                                                                     |
| 副作用   | <p>総症例 2455 例中、副作用の報告されたものは 525 例（21.38%）であり、その主なものは下痢 170 例（6.92%）、食欲不振 80 例（3.26%）、腹痛 52 例（2.12%）、悪心 41 例（1.67%）等の消化器症状であった。</p> <ol style="list-style-type: none"> <li>1. 重大な副作用 <ol style="list-style-type: none"> <li>(1) 乳酸アシドーシス（頻度不明）<br/>乳酸アシドーシス（血中乳酸値の上昇、乳酸/ピルビン酸比の上昇、血液 pH の低下等を示す）は予後不良のことが多い。一般的に発現する臨床症</li> </ol> </li> </ol>                                                                                                                                                                                                                                                |                                                                                     |

状は様々であるが、胃腸症状、倦怠感、筋肉痛、過呼吸等の症状がみられることが多く、これらの症状があらわれた場合には直ちに投与を中止し、必要な検査を行うこと。なお、乳酸アシドーシスの疑いが大きい場合には、乳酸の測定結果等を待つことなく適切な処置を行うこと。

(2) 低血糖（頻度不明）

低血糖症状があらわれることがあるので、患者の状態を十分観察しながら投与する。低血糖症状（初期症状：脱力感、高度の空腹感、発汗等）が認められた場合には通常はショ糖を投与し、 $\alpha$ -グルコシダーゼ阻害剤（アカルボース、ボグリボース、ミグリトール）との併用により低血糖症状が認められた場合にはブドウ糖を投与すること。

(3) 肝機能障害、黄疸（頻度不明）

AST（GOT）、ALT（GPT）、ALP、 $\gamma$ -GTP、ビリルビンの著しい上昇等を伴う肝機能障害、黄疸があらわれることがあるので、観察を十分に行之、異常が認められた場合には投与を中止し、適切な処置を行うこと。

(4) 横紋筋融解症

筋肉痛、脱力感、CK（CPK）上昇、血中及び尿中ミオグロビン上昇を特徴とする横紋筋融解症があらわれることがあるので、このような場合には投与を中止し、適切な処置を行うこと。

2. その他の副作用

|      | 5%以上 | 0.1～5%未満               | 0.1%未満 | 頻度不明                                                       |
|------|------|------------------------|--------|------------------------------------------------------------|
| 消化器  | 下痢   | 食欲不振、腹痛、悪心、嘔吐、腹部膨満感、便秘 | 消化不良等  | 胃炎、胃腸障害、放屁増加                                               |
| 血液   |      |                        |        | 貧血、白血球減少、血小板減少、白血球増加、好酸球増加                                 |
| 過敏症  |      | 発疹等                    |        | そう痒                                                        |
| 肝臓   |      |                        |        | 肝機能異常                                                      |
| 腎臓   |      |                        |        | BUN 上昇、クレアチニン上昇                                            |
| 代謝異常 |      |                        |        | CK（CPK）上昇、ケトosis、乳酸上昇、血中カリウム上昇、血中尿酸増加                      |
| その他  |      | 全身倦怠感、頭痛、頭重            | 眠気     | 筋肉痛、めまい、ふらつき、味覚異常、浮腫、動悸、発汗、脱力感、空腹感、ビタミン B <sub>12</sub> 減少 |

7.2. 治験薬の包装・表示

ラベルには、治験用である旨、治験調整医師（代表）の氏名及び職名並びに住所、治験薬コード名、治験薬の製造番号、貯蔵方法、使用期限を記載する。ラベルは PTP シートの包装箱に表示する。

|            |                                            |
|------------|--------------------------------------------|
| 治験用        | CCRC-001-M                                 |
|            | 本治験以外の目的で使用しないこと                           |
| 一般名        | メトホルミン塩酸塩                                  |
| 化学名        | 1,1-Dimethylbiguanide monohydrochloride    |
| 製造番号       | XXXX                                       |
| 環境条件       | 気密容器、室温保存                                  |
| 使用期限       | YY 年 MM 月                                  |
| 治験調整医師(代表) | 千葉大学医学部附属病院 婦人科 准教授 三橋 暁<br>千葉市中央区亥鼻 1-8-1 |

7.3. 治験薬の管理方法

- 1) 治験調整医師は治験開始後速やかに治験薬を実施医療機関の治験責任医師へ交付する。交付にあたっては、手順書に従う。
- 2) 治験実施医療機関の「治験薬の管理に関する手順書」に従い、治験薬を適切に管理する。
- 3) 治験責任医師は、治験薬の供給される保存条件、使用期限等取扱い方法を説明した文書（前述の手順書中に記載しているため、当該手順書が該当する）を治験実施医療機関の長、治験分担医師、治験協力者、治験薬管理者等に交付する。
- 4) 治験薬管理者は、「治験薬の管理に関する手順書」に従い治験薬を適切に保管し、管理及び使用状況を記録する。なお、本治験薬は本治験のみに使用し、他の目的に使用してはならない。
- 5) 治験責任医師及び治験薬管理者は、「治験薬管理表」の記載内容と治験薬使用数量の整合性について確認する。治験終了後は各実施医療機関にて「治験薬の管理に関する手順書」に従い、治験薬を廃棄する。

## 7.4. 併用薬

MPA を本治験の併用薬とする。MPA は、治験スケジュールに従い第 I 期に投与する。

|       |                                                                                                                                                                                                                                                                                                                                                                                                                                                                                                                                                                                                                                                                                                                                                                                                                                                                    |                                                                |
|-------|--------------------------------------------------------------------------------------------------------------------------------------------------------------------------------------------------------------------------------------------------------------------------------------------------------------------------------------------------------------------------------------------------------------------------------------------------------------------------------------------------------------------------------------------------------------------------------------------------------------------------------------------------------------------------------------------------------------------------------------------------------------------------------------------------------------------------------------------------------------------|----------------------------------------------------------------|
| 一般名   | メドロキシプロゲステロン酢酸エステル錠                                                                                                                                                                                                                                                                                                                                                                                                                                                                                                                                                                                                                                                                                                                                                                                                                                                |                                                                |
| 成分・含量 | 有効成分                                                                                                                                                                                                                                                                                                                                                                                                                                                                                                                                                                                                                                                                                                                                                                                                                                                               | メドロキシプロゲステロン酢酸エステル 200mg                                       |
| 剤型    | 白色・割線入り素錠                                                                                                                                                                                                                                                                                                                                                                                                                                                                                                                                                                                                                                                                                                                                                                                                                                                          |                                                                |
|       | 添加物                                                                                                                                                                                                                                                                                                                                                                                                                                                                                                                                                                                                                                                                                                                                                                                                                                                                | 日局カルメロースカルシウム<br>日局ステアリン酸マグネシウム<br>日局乳糖水和物<br>日局ヒドロキシプロピルセルロース |
| 保存条件  | 室温保存                                                                                                                                                                                                                                                                                                                                                                                                                                                                                                                                                                                                                                                                                                                                                                                                                                                               |                                                                |
| 効能・効果 | 乳癌<br>子宮体癌（内膜癌）                                                                                                                                                                                                                                                                                                                                                                                                                                                                                                                                                                                                                                                                                                                                                                                                                                                    |                                                                |
| 用法・用量 | 乳癌には、メドロキシプロゲステロン酢酸エステルとして通常成人 1 日 600 ～ 1200mg を 3 回に分けて経口投与する。<br>子宮体癌（内膜癌）には、メドロキシプロゲステロン酢酸エステルとして通常成人 1 日 400～600mg を 2～3 回に分けて経口投与する。<br>なお、症状により適宜増減する。                                                                                                                                                                                                                                                                                                                                                                                                                                                                                                                                                                                                                                                                                                      |                                                                |
| 併用禁忌  | ホルモン剤（黄体ホルモン、卵胞ホルモン、副腎皮質ホルモン等）との併用は血栓症を起こす恐れが高くなるため、併用禁忌である。                                                                                                                                                                                                                                                                                                                                                                                                                                                                                                                                                                                                                                                                                                                                                                                                       |                                                                |
| 副作用   | <p>調査症例数 4,104 例中、副作用発現症例は 1,166 例（28.4%）であり、副作用発現件数は延べ 1,749 件であった。その主なものは、体重増加 532 件（13.0%）、満月様顔貌 254 件（6.19%）、子宮出血 227 件（5.53%）、浮腫 63 件（1.54%）、血栓症 56 件（1.37%）、月経異常 44 件（1.07%）等であった。<br/>           （承認時までの調査及び市販後の使用成績調査の集計）</p> <ol style="list-style-type: none"> <li>1. 重大な副作用               <ol style="list-style-type: none"> <li>(1) 血栓症（1.37%）<br/>                   脳梗塞、心筋梗塞、肺塞栓症、腸間膜血栓症、網膜血栓症、血栓性静脈炎等があらわれることがあるので観察を十分に行い、このような症状又はこれらの初期症状があらわれた場合には、投与を中止し適切な処置を行うこと。</li> <li>(2) うっ血性心不全（0.02%）<br/>                   うっ血性心不全があらわれることがあるので観察を十分に行い、このような症状があらわれた場合には減量又は休薬等適切な処置を行うこと。</li> <li>(3) アナフィラキシー（頻度不明）<br/>                   アナフィラキシー様症状等があらわれたとの報告があるので、このような症状があらわれた場合には投与を中止すること。</li> <li>(4) 乳頭水腫（頻度不明）<br/>                   視力消失、眼球突出、複視、片頭痛が急にあらわれた場合には、投与を一時中断し、眼科的検査を実施すること。その結果、乳頭水腫であると診断された</li> </ol> </li> </ol> |                                                                |

|  |                         |                           |                       |
|--|-------------------------|---------------------------|-----------------------|
|  | 場合には、投与を中止し、適切な処置を行うこと。 |                           |                       |
|  | 2. その他の副作用              |                           |                       |
|  |                         | 0.1～15%未満                 | 0.1%未満                |
|  | 内分泌                     | 満月様顔貌、子宮出血、月経異常、帯下の変化、無月経 | 多毛、乳房痛、乳汁漏出           |
|  | 血液                      |                           | 頻度不明                  |
|  | 糖代謝                     | 糖尿、耐糖能異常、糖尿病悪化            | 白血球数増加、血小板数増加         |
|  | 精神神経系                   | しびれ、頭痛、振戦、めまい             | 糖尿病性白内障増悪             |
|  | 全身症状                    | 体重増加、食欲亢進、発熱、倦怠感          | 筋痙攣、意識低下、抑うつ、多幸症、集中困難 |
|  | 電解質代謝                   | 浮腫                        | 眠気、不眠、神経過敏、無関心、錯乱様、興奮 |
|  | 眼                       | 視覚障害                      | 疲労感                   |
|  | 肝臓                      | LDH、AST、ALT上昇             | 高カルシウム血症              |
|  | 循環器                     | 胆汁うっ滞性黄疸                  |                       |
|  | 消化器                     | 腹痛、悪心・嘔吐、食欲不振、口渇、便秘、下痢    | 頻脈                    |
|  | 皮膚・粘膜                   | 発疹、発汗、座瘡、そう痒感             |                       |
|  | その他                     | 潮紅、息切れ、嘔声、熱感              |                       |

8. 観察・検査・評価項目、方法及び実施時期

8.1. 実施スケジュールと手順

治験責任医師又は治験分担医師は、以下の観察・検査・評価の実施スケジュールに従い観察・検査等を実施する。

第Ⅰ期：MPA 投与期のスケジュール

| 観察時期                  | スクリーニング<br>登録前*1 | 第Ⅰ期：MPA 治療期    |               |               |                |                |                |                |                |                |                       | 第Ⅰ期の<br>中止時*7 |
|-----------------------|------------------|----------------|---------------|---------------|----------------|----------------|----------------|----------------|----------------|----------------|-----------------------|---------------|
|                       |                  | 0 週<br>(Day-1) | 4 週<br>(1 か月) | 8 週<br>(2 か月) | 12 週<br>(3 か月) | 16 週<br>(4 か月) | 20 週<br>(5 か月) | 24 週<br>(6 か月) | 28 週<br>(7 か月) | 32 週<br>(8 か月) | 36 週 (9 か月)<br>(寛解判定) |               |
| 許容範囲 (日)              | -28 日            | +14 日          | -7~+14 日      | -7~+14 日      | -7~+14 日       | -7~+14 日       | -7~+14 日       | -7~+14 日       | -7~+14 日       | -7~+14 日       | - 21 日                | +14 日         |
| 文書による同意取得             | ●                |                |               |               |                |                |                |                |                |                |                       |               |
| 登録・割付                 |                  | ●              |               |               |                |                |                |                |                |                |                       |               |
| 治験薬および併用薬の処方*2        |                  | ●*3            | ●             | ●             | ●              | ●              | ●              | ●              | ●              | ●              |                       |               |
| 患者背景調査                | ●                |                |               |               |                |                |                |                |                |                |                       |               |
| 身体所見 (身長*4・体重・BMI・PS) | ●                |                |               | ●             |                | ●              |                | ●              |                | ●              |                       | ●             |
| 服薬状況確認                |                  |                | ●             | ●             | ●              | ●              | ●              | ●              | ●              | ●              | ●                     | ●             |
| 子宮内膜組織診 (麻酔下全面搔爬術) *5 | ●                |                |               | ●             |                | ●              |                | ●              |                | ●              |                       |               |
| 効果判定 (寛解の判定) *6       |                  |                |               | ●             |                | ●              |                | ●              |                | ●              | ●                     |               |
| 血液学的検査                | ●                |                | ●             | ●             | ●              | ●              | ●              | ●              | ●              | ●              | ●                     | ●             |
| 生化学検査                 | ●*8              |                | ●             | ●*8           | ●              | ●*8            | ●              | ●*8            | ●              | ●*8            |                       | ●             |
| 血糖検査                  | ●*8              |                |               | ●*8           |                | ●*8            |                | ●*8            |                | ●*8            |                       |               |
| ホルモン検査                | ●                |                |               |               |                |                |                |                |                |                |                       |               |
| HbA1c                 | ●                |                |               | ▲*9           |                | ▲*9            |                | ▲*9            |                | ▲*9            |                       |               |
| D-ダイマー                | ●                |                | ▲*10          | ▲*10          | ▲*10           | ▲*10           | ▲*10           | ▲*10           | ▲*10           | ▲*10           |                       | ▲*10          |
| 心電図                   | ●                |                |               |               |                |                |                |                |                |                |                       | ▲*11          |
| 骨盤・胸部 CT              | ▲*12             |                |               |               |                |                |                |                |                | ▲*12           |                       | ▲*11          |
| 骨盤 MRI                | ▲*12             |                |               |               |                |                |                |                |                |                |                       | ▲*11          |
| 経膈超音波検査               | ●*13             |                |               | ●             |                | ●              |                | ●              |                | ●              |                       |               |
| 75g OGTT              | ●*14             |                |               |               |                |                |                |                |                |                |                       |               |
| 有害事象の観察               |                  | ←              |               |               |                |                |                |                |                |                |                       | →             |
| 併用薬の確認                | ←                |                |               |               |                |                |                |                |                |                |                       | →             |

- ※ 治験薬投与開始日 (Day1) は治験薬初回処方日 (Day-1) の翌日とする。  
※ 36 週来院時に寛解判定を行い、第Ⅱ期に移行できると医師が判断した場合は治験薬及び併用薬を処方する。  
※ 36 週来院時 (第Ⅱ期の治験薬処方日) の翌日を第Ⅱ期の起点 (Day1) とする。  
※ Ⅰ期、Ⅱ期ともに、4 週 (Day28) を 1 か月と考え、それぞれの期の起点から週数を計算する。

- \*1: スクリーニング検査は同意後、登録前 4 週 (28 日) 以内に実施する。ただし、病理検査データ並びに CT 及び MRI 検査データは、通常診療下で実施したデータを使用できるものとする。確定診断に至る病理検査は同意取得前 24 週 (168 日) 以内、CT・MRI は同意取得前 8 週 (56 日) 以内であれば使用可とする (他院で施行したものも使用可)。  
\*2: 治験薬の処方は B 群及び C 群に対して行う。A 群は併用薬のみ処方する。  
\*3: 初回処方日の翌日から治験薬服用開始する。初回処方日の翌日を治療期の開始日 (Day 1) と定義する。0 週 Day-1 の来院は原則として登録後 14 日以内とする。  
\*4: 身長は初回のみ測定する。  
\*5: MPA 投与中の内膜搔爬術による検査は、8 週毎に行う。前 7 日～後 14 日を許容範囲とする。同日空腹時採血を行う。  
\*6: 効果判定は内膜搔爬術施行後初回の外来受診日で実施する。36 週時の効果判定 (寛解判定) 来院日まで治験薬及び併用薬の服用は継続する。

- \*7: 有害事象で中止後、因果関係の否定できない有害事象が発現している場合は、可能な限り回復するまで観察を継続する。  
\*8: 空腹時採血を実施する。  
\*9: 登録前の HbA1c (NGSP) が 6.5 以上の場合経過測定を行う。  
\*10: 血栓が疑われる場合に実施する。  
\*11: 増悪時や有害事象発生時、必要に応じて施行する。  
\*12: 子宮体癌症例では必須とし、子宮内膜異型増殖症例は必須としない。  
\*13: スクリーニング検査では PCO の有無を確認する。  
\*14: 糖尿病やスクリーニング検査で糖尿病の基準に達する場合 (HbA1c 6.5 以上かつ空腹時血糖  $\geq 126$  mg/dL) は、実施しない。

第 II 期：維持治療期のスケジュール

| 観察時期                        | 第 I 期<br>36 週<br>(寛解判定) | 第 II 期：維持治療期   |                |                |                 |                 |                 |                 |                 |                  |                  |                  |                  |
|-----------------------------|-------------------------|----------------|----------------|----------------|-----------------|-----------------|-----------------|-----------------|-----------------|------------------|------------------|------------------|------------------|
|                             |                         | 12 週<br>(3 か月) | 24 週<br>(6 か月) | 36 週<br>(9 か月) | 48 週<br>(12 か月) | 60 週<br>(15 か月) | 72 週<br>(18 か月) | 84 週<br>(21 か月) | 96 週<br>(24 か月) | 108 週<br>(27 か月) | 120 週<br>(30 か月) | 132 週<br>(33 か月) | 144 週<br>(36 か月) |
| 許容範囲 (日)                    | - 21 日                  | ±28 日          | ±28 日          | ±28 日          | ±28 日           | ±28 日           | ±28 日           | ±28 日           | ±28 日           | ±28 日            | ±28 日            | ±28 日            | ±28 日            |
| 治験薬および維持治療薬 (月経コントロール薬) の処方 | ●                       | ●              | ●              | ●              | ●               | ●               | ●               | ●               | ●               | ●                | ●                | ●                | ●                |
| 不妊治療状況・挙児希望の有無*1            |                         |                | ●              |                | ●               |                 | ●               |                 | ●               |                  | ●                |                  | ●                |
| 服薬状況確認*2                    | ●                       | ●              | ●              | ●              | ●               | ●               | ●               | ●               | ●               | ●                | ●                | ●                | ●                |
| 身体所見 (体重、BMI、PS)            |                         |                | ●              |                | ●               |                 | ●               |                 | ●               |                  | ●                |                  | ●                |
| 子宮内膜検査*3                    |                         | ●              | ●              | ●              | ●               | ●               | ●               | ●               | ●               | ●                | ●                |                  | ●                |
| 効果判定 (寛解の判定)                | ●                       |                |                |                |                 |                 |                 |                 |                 |                  |                  |                  |                  |
| 血液学的検査                      |                         |                | ●              |                | ●               |                 | ●               |                 | ●               |                  | ●                |                  | ●                |
| 生化学検査                       |                         |                | ●*4            |                | ●*4             |                 | ●*4             |                 | ●*4             |                  | ●*4              |                  | ●*4              |
| 空腹時血糖及びインスリン                |                         |                | ●*4            |                | ●*4             |                 | ●*4             |                 | ●*4             |                  | ●*4              |                  | ●*4              |
| HbA1c                       |                         |                | ▲*5            |                | ▲*5             |                 | ▲*5             |                 | ▲*5             |                  | ▲*5              |                  | ▲*5              |
| 心電図                         |                         |                |                |                |                 |                 |                 |                 |                 |                  |                  |                  |                  |
| 骨盤・胸部 CT                    |                         |                |                |                |                 |                 |                 |                 |                 |                  | ▲*6              |                  |                  |
| 骨盤 MRI                      |                         |                |                |                |                 |                 |                 |                 |                 |                  |                  |                  |                  |
| 有害事象の観察                     | ←                       |                |                |                |                 |                 |                 |                 |                 |                  |                  |                  | →                |
| 併用薬の確認                      | ←                       |                |                |                |                 |                 |                 |                 |                 |                  |                  |                  | →                |
| 転帰の判定                       |                         |                |                |                |                 |                 |                 |                 |                 |                  | ●                |                  |                  |

※ 第 II 期の Day1 は、36 週来院時 (第 I 期終了時) の翌日とする。

\*1：不妊治療状況、妊娠・挙児希望の有無などを確認する。  
\*2：妊娠期間・その他メトホルミンの中断期間を確認する。  
\*3：寛解後の経過観察は吸引組織診・簡易組織診・細胞診などで行う。外来での組織診で異常が指摘された場合や、内膜細胞診で疑陽性以上の場合は麻酔下の全面掻爬術で組織検査を行う。再発が確定しない場合は、再検査施行まで経過観察を行う。

\*4：検査日採血は空腹で実施する。  
\*5：登録前の HbA1c(NGSP) が 6.5 以上の場合経過測定を行う。  
\*6：子宮体癌症例では必須とし、子宮内膜異型増殖症症例では必要に応じて実施する。

Ver. 2.0

| 観察時期                         | 第Ⅱ期：維持治療期      |                 |                |                 |                |                 |                |                 |                | 完了時             | 第Ⅱ期の中止時 <sup>*6</sup> |
|------------------------------|----------------|-----------------|----------------|-----------------|----------------|-----------------|----------------|-----------------|----------------|-----------------|-----------------------|
|                              | 156週<br>(39か月) | 168週<br>(42か月)  | 180週<br>(45か月) | 192週<br>(48か月)  | 204週<br>(51か月) | 216週<br>(54か月)  | 228週<br>(57か月) | 240週<br>(60か月)  | 252週<br>(63か月) |                 |                       |
| 許容範囲（日）                      | ±28 日          | ±28 日           | ±28 日          | -84 日           |                       |
| 治験薬および維持治療薬（月経コントロール薬）の処方    | ●              | ●               | ●              | ●               | ●              | ●               | ●              | ●               | ●              |                 |                       |
| 不妊治療状況・育児希望の有無 <sup>*1</sup> |                | ●               |                | ●               |                | ●               |                | ●               |                | ●               |                       |
| 服薬状況確認 <sup>*2</sup>         | ●              | ●               | ●              | ●               | ●              | ●               | ●              | ●               | ●              | ●               | ●                     |
| 身体所見（体重、BMI、PS）              |                | ●               |                | ●               |                | ●               |                | ●               |                | ●               |                       |
| 子宮内膜検査 <sup>*3</sup>         |                | ●               |                | ●               |                | ●               |                | ●               |                | ●               | ● <sup>*7</sup>       |
| 血液学的検査                       |                | ●               |                | ●               |                | ●               |                | ●               |                | ●               | ●                     |
| 生化学検査                        |                | ● <sup>*4</sup> | ●                     |
| 空腹時血糖及びインスリン                 |                | ● <sup>*4</sup> |                       |
| HbA1c                        |                | ▲ <sup>*5</sup> |                       |
| 心電図                          |                |                 |                |                 |                |                 |                |                 |                |                 | ▲ <sup>*8</sup>       |
| 骨盤・胸部 CT                     |                |                 |                |                 |                |                 |                |                 |                |                 | ▲ <sup>*8</sup>       |
| 骨盤 MRI                       |                |                 |                |                 |                |                 |                |                 |                |                 | ▲ <sup>*8</sup>       |
| 有害事象の観察                      | ←              |                 |                |                 |                |                 |                |                 |                |                 | →                     |
| 併用薬の確認                       | ←              |                 |                |                 |                |                 |                |                 |                |                 | →                     |
| 転帰の判定                        |                |                 |                |                 |                |                 |                |                 |                | ●               | ●                     |

※ 第Ⅱ期の Day1 は、36 週来院時（第Ⅰ期終了時）の翌日とする。

\*1：不妊治療状況、妊娠・育児希望の有無などを確認する。

\*2：妊娠期間・その他メトホルミンの中断期間を確認する。

\*3：寛解後の経過観察は吸引組織診・簡易組織診・細胞診などで行う。外来での組織診で異常が指摘された場合や、内膜細胞診で疑陽性以上の場合は麻酔下の全面掻爬術で組織検査を行う。

\*4：検査日採血は空腹で実施する。

\*5：登録前の HbA1c(NGSP) が 6.5 以上の場合経過測定を行う。

\*6：-84 日以内の最終受診日のデータで可とし、不足する検査のみ実施する。

\*7：再発で中止の場合、再発と確定した時点での検査結果を報告。有害事象で中止の場合は必要なし。

\*8：再発時や有害事象発生時に必要に応じて施行する。

### 8.1.1. スクリーニング検査

文書による同意取得後、スクリーニング検査を開始する。治験責任医師又は治験分担医師は以下のスクリーニング検査を行い、選択基準を満たし、除外基準に抵触しない患者を症例登録する。検査項目は以下に記載の通りとする。

- (1) 患者背景（被験者識別コード、生年月日、同意取得年月日、病理検査実施日、組織診断名、婚姻状態、不妊治療歴・期間、月経不順の有無、妊娠・出産歴、既往歴、合併症、前治療（月経コントロールの方法及び薬剤）の有無、PCOSの有無、家族歴（Lynch 症候群））
- (2) 身体所見（ECOG PS、身長、体重、BMI 値）
- (3) 子宮内膜全面搔爬術による組織診  
※確定診断を行う病理検査は子宮内膜全面搔爬術に限らず、他院を含む同意取得前 24 週（168 日）以内の子宮内膜検査の結果を採用できる。  
※子宮内膜全面搔爬術以外の方法で確定診断を行った場合、他院を含む同意取得前 24 週（168 日）から登録前までの子宮内膜全面搔爬術にて他の組織型癌が否定できることを確認する。
- (4) 血液学的検査（WBC、Hb、Plt）
- (5) 生化学検査（AST、ALT、Cr、eGFR、T-Bil、Ca、空腹時 TG・LDL・HDL）
- (6) 血糖検査（空腹時 Glucose・insulin）、HOMA-R  
空腹時血糖値及びインスリン値を測定し、HOMA-R を算出する。（HOMA-R=空腹時血糖値×空腹時インスリン値÷405）
- (7) ホルモン検査（LH、FSH、PRL、E2、testosterone）
- (8) HbA1c
- (9) D-ダイマー
- (10) 心電図
- (11) 経膈超音波検査（内膜厚、多嚢胞性卵巣の有無）
- (12) 骨盤・胸部 CT、骨盤 MRI（筋層浸潤、遠隔転移、リンパ節腫大の有無）  
※子宮体癌症例は必須とする。子宮内膜異型増殖症症例では必須とせず、必要に応じて実施する。  
※CT は原則として造影 CT とする。
- (13) 耐糖能検査（75gOGTT）  
※既に糖尿病と診断されている場合やスクリーニング検査で糖尿病の基準に達する場合（HbA1c 6.5 以上かつ空腹時血糖 $\geq$ 126mg/dL）は検査を行わない。

糖負荷前、負荷後 30 分、60 分、120 分の血糖値及びインスリン値を測定する。

(14) 併用薬の確認

(1)、(2)、(4)～(11)、(13)の検査値は、同意取得後、登録日前 4 週（28 日）以内に収集する。

(3)のデータは、通常診療下で行われた同意取得前 24 週（168 日）から登録前までのデータであれば使用可とする。

(12)のデータは、同意取得前 8 週（56 日）から登録前までのデータであれば使用可とする。

### 8.1.2. 第 I 期の観察・検査・評価項目

MPA 投与中は 1 か月毎に以下の項目を経過観察する。以下の項目についてデータを収集し EDC に入力する。

#### 8.1.2.1. 0 週（0 か月）

- (1) 登録、割付
- (2) 治験薬および併用薬の処方

#### 8.1.2.2. 4 週（1 か月）、12 週（3 か月）、20 週（5 か月）、28 週（7 か月）

- (1) 治験薬および併用薬の処方
- (2) 服薬状況確認
- (3) 血液学的検査（WBC、Hb、Plt）
- (4) 生化学検査（AST、ALT、Cr、eGFR、T-Bil、Ca）
- (5) D-ダイマー ※血栓が疑われる場合に実施する。
- (6) 有害事象の観察（悪心、嘔吐、食欲不振、下痢、その他の異常所見の有無について観察を行う）
- (7) 併用薬の確認（参照：6.11.併用薬・併用療法）

#### 8.1.2.3. 8 週（2 か月）、16 週（4 か月）、24 週（6 か月）

- (1) 治験薬および併用薬の処方
- (2) 身体所見（体重、BMI 値、ECOG PS）
- (3) 服薬状況確認（参照：6.10.服薬状況の報告）

- (4) 子宮内膜組織診（麻酔下の全面搔爬術を行い、組織診断により病変の有無を確認する）。
- (5) 効果判定（内膜検査の結果を次の受診日までに判定する）
- (6) 血液学的検査（WBC、Hb、Plt）
- (7) 生化学検査（AST、ALT、Cr、eGFR、T-Bil、Ca、空腹時 TG・LDL・HDL）
- (8) 血糖検査（空腹時 Glucose・insulin）、HOMA-R を計算
- (9) HbA1c ※登録前の値が 6.5（NGSP）以上の場合のみ測定する。
- (10) D-ダイマー ※血栓が疑われる場合に実施する。
- (11) 超音波検査（内膜厚）
- (12) 有害事象の観察（悪心、嘔吐、食欲不振、下痢、その他の異常所見の有無について観察を行う）
- (13) 併用薬の確認（参照：6.11.併用薬・併用療法）

#### 8.1.2.4. 32 週（8 か月）

- (1) 治験薬および併用薬の処方
- (2) 身体所見（体重、BMI 値、ECOG PS）
- (3) 服薬状況確認
- (4) 子宮内膜組織診（麻酔下の全面搔爬術を行い、組織診断により病変の有無を確認する。）
- (5) 血液学的検査（WBC、Hb、Plt）
- (6) 生化学検査（AST、ALT、Cr、eGFR、T-Bil、Ca、空腹時 TG・LDL・HDL）
- (7) 血糖検査（空腹時 Glucose・insulin）HOMA-R を計算
- (8) HbA1c ※登録前の値が 6.5（NGSP）以上の場合のみ測定する。
- (9) D-ダイマー ※血栓が疑われる場合に実施する。
- (10) 超音波検査（内膜厚）
- (11) 有害事象の観察（悪心、嘔吐、食欲不振、下痢、その他の異常所見の有無について観察を行う）。
- (12) 併用薬の確認（参照：6.11.併用薬・併用療法）
- (13) 骨盤・胸部 CT

※子宮体癌症例は必須とする。子宮内膜異型増殖症症例では必須とせず、必要に応じて実施する。

※CT は原則として造影 CT とする。

#### 8.1.2.5. 寛解判定（36 週,9 か月）

寛解を認めた症例は、来院時に MPA 服用終了を指示する。来院日の翌日より維持治療薬（月経コントロール薬）へ切り替える。非寛解例は治験中止とする。32 週の検査施行後 1-4 週で寛解判定を行う（36 週までには判定を行う）。

- (1) 治験薬および維持治療薬（月経コントロール薬）の処方
- (2) 服薬状況の確認
- (3) 寛解の判定（32 週時に行った内膜検査の結果を判定する。**10.1.3.1.寛解判定** 参照）
- (4) 有害事象の観察（悪心、嘔吐、食欲不振、下痢、その他の異常所見の有無について観察を行う）。
- (5) 併用薬の確認（参照：**6.11.併用薬・併用療法**）

#### 8.1.2.6. 第Ⅰ期における中止時

治験責任医師または分担医師は、中止と判断した場合は下記の検査を行う。

- (1) 身体所見（体重、BMI 値、ECOG PS）
- (2) 服薬状況確認
- (3) 血液学的検査（WBC、Hb、Plt）
- (4) 生化学検査（AST、ALT、Cr、eGFR、T-Bil、Ca）
- (5) D-ダイマー ※血栓が疑われる場合に実施する。
- (6) 心電図 ※増悪時、有害事象発生時に必要に応じて実施する。
- (7) 骨盤・胸部 CT、骨盤 MRI ※増悪時、有害事象発生時に必要に応じて実施する。
- (8) 有害事象の観察（悪心、嘔吐、食欲不振、下痢、その他の異常所見の有無について観察を行う。）
- (9) 併用薬の確認（参照：**6.11.併用薬・併用療法**）

#### 8.1.3. 第Ⅱ期の観察・検査・評価項目

第Ⅰ期の 32 週（8 か月）来院時に施行した病理検査の結果、36 週来院時の寛解判定において寛解が確認された症例は第Ⅱ期に移行し、治験を継続する。

寛解判定日を第Ⅱ期の Day-1 とし、翌日を Day1 として Day1 より第Ⅱ期の治療を行う。

##### 8.1.3.1. 12 週（3 か月）毎（12、24、36、48、60、・・・、240、252 週）

- (1) 治験薬（B 群、C 群）および維持治療薬（月経コントロール薬）の処方

(2) 服薬状況の確認 (B 群、C 群)

(3) 子宮内膜の検査 (再発の有無を確認する。) ※ただし 120 週以降は 24 週ごとに行う。

試験掻爬術、吸引組織検査、セルブロックを用いた簡易組織診や細胞診を行う。組織診で異常指摘もしくは、細胞診疑陽性以上の場合は、4 週以内に子宮内膜精密検査を行い再発の有無を確認する。その場合再発イベント発生時は再発と医師が判断した日とする。

(外来経過観察中の内膜組織検査の方法は各施設で判断する)。

再発を疑い全面掻爬術を行っても再発・非再発と断定できない場合は、経過観察後に再検査を施行する。再発と判断されるまでは、治験は継続する。

(4) 有害事象の観察 (悪心、嘔吐、食欲不振、下痢、その他の異常所見の有無について観察を行う。)

(5) 併用薬の確認 (参照：6.11.併用薬・併用療法)

(6) 骨盤・胸部 CT ※120 週 (30 か月) のみ。

※子宮体癌症例は必須とする。子宮内膜異型増殖症症例では必須とせず、必要に応じて実施する。

※CT は原則として造影 CT とする。

(7) 転帰の判定 ※120 週 (30 か月) のみ

### 8.1.3.2. 24 週 (6 か月) 毎 (24、48、72、96、120、…、216、240 週)

8.1.3.1.の項目に加え、下記の評価を実施する。

(1) 不妊治療状況・挙児希望の有無の確認

(2) 身体所見 (体重、BMI 値、ECOG PS)

(3) 血液学的検査 (WBC、Hb、Plt)

(4) 生化学検査 (AST、ALT、Cr、eGFR、T-Bil、空腹時 TG・LDL・HDL)

(5) 血糖検査 (空腹時 Glucose、insulin) HOMA-R を計算

(6) HbA1c ※登録前の値が 6.5 以上の場合、測定する。

### 8.1.3.3. 第 II 期における中止時

下記の検査を実施する。(1) は再発を疑った時点のデータで可とする。

有害事象により治験を中止した場合、(1)は実施しない。

(1) 子宮内膜検査 (再発の有無を確認する。)

8.1.3.2.に記載のように、通常 visit 時に施行した試験掻爬術、吸引組織検査、セルブロックを用

いた簡易組織診や細胞診で再発を疑う場合は、4 週以内に子宮内膜精密検査を行う。

再発と確定した病理組織検査結果を記録する。

- (2) 服薬状況の確認
- (3) 血液学的検査（WBC、Hb、Plt）
- (4) 生化学検査（AST、ALT、Cr、eGFR、T-Bil）
- (5) 心電図 ※再発時、有害事象発生時に必要に応じて実施する。
- (6) 骨盤・胸部 CT、骨盤 MRI ※再発時、有害事象発生時に必要に応じて実施する。
- (7) 有害事象の観察（悪心、嘔吐、食欲不振、下痢、その他の異常所見の有無について観察を行う。）
- (8) 併用薬の確認（参照：6.11.併用薬・併用療法）
- (9) 転帰の判定

#### 8.1.4. 必要に応じて実施する安全性評価項目

全身倦怠感、筋肉痛、過呼吸などの乳酸アシドーシスを否定できない症状を認めた場合は、血液ガス分析を実施する。

#### 8.1.5. 完了時

治験の完了時には、下記の検査結果を確認する。なお、完了時検査が 8.1.3.1 12 週毎に示す項目のみの Visit であった場合、完了時検査の 12 週前に実施した規定 Visit（8.1.3.2 24 週毎を含む）より結果を補填できる。もし規定通り観察・検査・評価を実施していない場合には、完了時に再度検査を実施し、治験完了とする。

- (1) 不妊治療状況・挙児希望の有無の確認
- (2) 服薬状況確認
- (3) 身体所見（体重、BMI、ECOG PS）
- (4) 子宮内膜検査（再発の有無を確認する。）

試験掻爬術、吸引組織検査、セルブロックを用いた簡易組織診や細胞診を行う。組織診で異常指摘もしくは細胞診疑陽性以上の場合は、精密検査を行う（外来経過観察中の内膜組織検査の方法は各施設で判断）。

- (5) 血液学的検査（WBC、Hb、Plt）
- (6) 生化学検査（AST、ALT、Cr、eGFR、T-Bil、空腹時 TG・LDL・HDL）

- (7) 血糖検査（空腹時 GLU、insulin）（HOMA-R を計算）
- (8) HbA1c ※登録前の値が 6.5 以上の場合、測定する。
- (9) 有害事象の観察（悪心、嘔吐、食欲不振、下痢、その他の異常所見の有無について観察を行う。）
- (10) 併用薬の確認（参照：6.11.併用薬・併用療法）
- (11) 転帰の判定

8.1.6. 妊娠時

被験者の妊娠を認めた場合は、治験責任医師または分担医師は以下の情報を収集する。

- 1) 妊娠確認日
- 2) 妊娠方法（自然妊娠、不妊治療）
- 3) 妊娠転帰（流産・死産・生産、転帰週数）
- 4) 生児獲得日（分娩日）

また、妊娠中は可能な限りスケジュールに沿って来院し、経過観察を行う。里帰り出産などのため来院が難しい場合は、電話連絡などで状況を確認することも可とする。

9. 有害事象発生時の取扱い

9.1. 有害事象の定義

有害事象とは同意取得後、Day1 以降に発生した全ての好ましくない、あるいは意図しない徴候（臨床検査値の異常変動を含む）、症状または疾病のことであり、治験薬との因果関係を問わない。本治験では、治験薬投与時から治験終了後 30 日までに発現したあらゆる好ましくない医療上のできごとを有害事象として取り扱う。

9.2. 有害事象発生時の被験者への対応

治験責任医師または治験分担医師は、有害事象を認めたときは、直ちに適切な処置を行うとともに、治験薬の投与を中止した場合や、有害事象に対する治療が必要となった場合には、被験者にその旨を伝える。

### 9.3. 報告の対象となる有害事象

同意取得後、Day1以降に発生した有害事象は、治験薬との因果関係の有無に関わらず、全て記録に残す。治験薬服用中に治験終了もしくは中止となった場合は、治験終了後 30 日までに発生した有害事象について、治験薬との因果関係によらず記録に残す。治験薬との因果関係が否定できない有害事象が、治験期間終了までに未回復の場合は、原則として回復するまで追跡する。ただし、治験責任医師又は治験分担医師が、治験薬の影響は消失しており被験者の安全性は十分確保され、それ以上の追跡は必要ないと判断した場合、原疾患の悪化や合併症の悪化等による症状が慢性化している場合、もしくは転院や後治療の開始等で観察が困難な場合は、この限りではない。治験薬との因果関係が否定できる有害事象については、追跡期間は治験終了後 30 日までとする。

### 9.4. 有害事象の評価に必要な記載内容

- 1) 有害事象の名称
- 2) 発現日
- 3) 消失日
- 4) 転帰：回復、軽快、回復したが後遺症あり、未回復、死亡、不明
- 5) 処置（治験薬の投与）：変更なし、中止、休薬、減量、該当せず
- 6) その他の処置：なし、薬物治療、その他
- 7) 重篤度：非重篤、重篤
- 8) 重症度：Grade1～5（CTCAE, version 4.0 分類に従う）
- 9) 治験薬との因果関係：関連あり、関連なし

#### 9.4.1. 有害事象の回復性と治験薬との因果関係

有害事象における治験薬との因果関係の判定に際しては、少なくとも合理的な可能性があり、否定できない有害事象を副作用と定義する。因果関係判定を行う際には、投与中止後の消失、投与再開後の再発、既に当該治験薬又は類薬において因果関係が確立、交絡するリスク因子がない、暴露量・暴露期間との整合性がある、正確な既往等の裏付けにより治験薬の関与がほぼ間違いなく説明可能、併

1  
2  
3  
4  
5  
6  
7  
8  
9  
10  
11  
12  
13  
14  
15  
16  
17  
18  
19  
20  
21  
22  
23  
24  
25  
26  
27  
28  
29  
30  
31  
32  
33  
34  
35  
36  
37  
38  
39  
40  
41  
42  
43  
44  
45  
46  
47  
48  
49  
50  
51  
52  
53  
54  
55  
56  
57  
58  
59  
60

用治療が原因である合理的な可能性が見られない等を参考にし、治験薬との因果関係が否定できないとされた根拠を記録に残す。

**9.5. 重篤な有害事象発生時の取り扱い**

**9.5.1. 重篤な有害事象の定義**

重篤な有害事象とは、次のいずれかに該当するものとする。

- (1) 死亡に至るもの
- (2) 生命を脅かすもの
- (3) 入院／入院期間の延長
- (4) 永続的または顕著な障害／機能不全
- (5) 先天性異常をきたすもの
- (6) その他、上記に準じて重篤なもの

なお、(3)の「入院」には、再検査、追跡調査のための入院又は入院期間の延長、及び治験前より予定していた療法又は検査を治験中に実施することのみを目的とした入院（予定手術や検査等）は含まれない。（ただし、その入院中に新たに発生したものは有害事象として取扱う。）

**9.5.2. 重篤な有害事象の報告手順**

治験実施中に重篤な有害事象が発生した場合は、治験責任医師又は治験分担医師は、被験者に対して直ちに適切な処置を行う。その上で、次の手順に従い当該有害事象情報を取り扱う。

なお、安全性情報の取り扱い手順については、別途作成する「安全性情報の管理に関する手順書」に従うものとする。

- (1) 自ら治験を実施する者から実施医療機関の長、治験調整委員会及び治験薬提供者への報告

自ら治験を実施する者は、因果関係に関わらず、当該有害事象情報を可能な限り速やかに実施医療機関の長に報告するとともに、治験調整委員会及び治験薬提供者に報告する。報告には「重篤な有害事象に関する報告書」（統一書式 12 及び（医）詳細記載用書式）を用いる。

予測可能性は、次のように判断する。

- 1) 既知
  - 治験薬概要書に記載のある事象

- 本治験で既に発生し、治験責任医師へ報告した事象

2) 未知

- 治験薬概要書に記載のない事象
- 本治験で既に発生し、治験責任医師へ報告した事象であっても、性質、症状の程度又は発現傾向が一致しないもの

(2) 治験調整委員会による各実施医療機関の実施責任医師への通知

治験調整委員会は、自ら治験を実施する者から入手した報告内容を確認し、他の各実施医療機関の自ら治験を実施する者に当該有害事象を通知する。

(3) 自ら治験を実施する者と治験調整委員会との協議

各実施医療機関の自ら治験を実施する者は、治験調整委員会から入手した報告内容を確認し、必要に応じ治験調整委員会と協議し、自ら治験を実施する者としての意見（厚生労働大臣への報告の必要性を含む）を治験調整委員会に報告する。

(4) 厚生労働大臣への報告

自ら治験を実施する者が厚生労働大臣への報告が必要と判断した場合には「様式第 7 及び 8」及び「整理票」を作成し、独立行政法人医薬品医療機器総合機構（以下、「総合機構」という）に報告する。報告の期間については、薬機法施行規則第 273 条に従い、重篤性及び未知・既知等の分類に従い、7 日又は 15 日以内とする。

(5) 実施医療機関の長への報告

自ら治験を実施する者は、他の実施医療機関において発生した重篤な有害事象について、厚生労働大臣への報告がなされた場合には、治験調整委員会より入手した「様式第 7 及び 8」の内容を、可能な限り速やかに実施医療機関の長に報告する。

(6) 追加情報の入手時の対応

当該有害事象が発生した実施医療機関の自ら治験を実施する者は、当該事象に関する追加情報が得られた場合には、可能な限り速やかに実施医療機関の長に追加報告を行うとともに、治験調整委員会及び治験薬提供者に報告する。当該追加情報の取扱いは、上記(1)～(5)の手順に準ずることとし必要に応じ総合機構への報告等を行う。

## 9.6. 重要な有害事象の報告

重篤な有害事象の基準を満たさないが重要な有害事象として、以下を定義する。

乳酸アシドーシス

治験責任医師又は治験分担医師は、重要な有害事象が発現した場合、治験薬との因果関係を問わず適切な処置を行い、治験調整委員会へ速やかに報告する。報告の様式は別紙2（Appendix）を用いる。なお、**9.5.1. 重篤な有害事象の定義**に該当する場合は、**9.5.2. 重篤な有害事象発生時の報告手順**に従い、報告を行う。

9.7. 予測される副作用

副作用とは、有害事象のうち治験薬との因果関係のある事象である。本治験薬メトホルミンは古くから使用される糖尿病治療薬であり、安全性は十分担保されている。しかし、以下のような副作用が考えられる。

グリコラン®錠 250mg の添付文書（第17版）によると、本剤投与症例 2,455 例中、副作用の報告されたものは 525 例（21.38%）であり、その主なものは下痢 170 例（6.92%）、食欲不振 80 例（3.26%）、腹痛 52 例（2.12%）、悪心 41 例（1.67%）等の消化器症状である。また、再評価結果時に報告された重大な副作用は、乳酸アシドーシス、低血糖、肝機能障害、黄疸、横紋筋融解症（いずれも頻度不明）である。

9.8. 重篤な有害事象の報告入手後の治験調整医師/調整事務局の対応手順

9.8.1. 独立データモニタリング委員会への報告

本治験中に治験責任医師より重篤な有害事象の報告を受けた場合、治験調整医師/治験調整事務局は治験の継続の適否または治験実施計画書の変更について独立データモニタリング委員会に審議を依頼することができる。独立データモニタリング委員会は審議した結果を治験調整医師に文書で勧告する。

なお、治験調整医師(治験調整事務局)が報告の内容の重要性、影響性などを判断し、先んじて緊急な対応が必要と判断した場合には、登録の一時停止や参加施設のへの周知事項の緊急連絡などの対策を講ずる。

### 9.8.2. 試験参加施設及び関連機関への連絡

報告された有害事象に対し、独立データモニタリング委員会の審査・勧告内容を試験参加全施設の治験責任医師及び関連機関に文書（電子メール可）にて通知する。参加施設及び関連機関への連絡においては緊急度に応じて電話連絡も可であるが、追って速やかに文書（FAX・郵送・電子メール）による連絡を行う。もし、独立データモニタリング委員会が中止を勧告した場合、治験調整医師は速やかに試験の中止及びその理由を医療機関の長及び各施設の責任医師に報告する。

### 9.9. 緊急時の連絡先

治験調整医師（代表） 三橋 暁

千葉大学医学部附属病院（〒260-8677 千葉県千葉市中央区亥鼻 1-8-1）

TEL：043-222-7171（内線 5314）

FAX：043-226-2122

E-mail：antira@faculty.chiba-u.jp

治験調整事務局

千葉大学医学部附属病院臨床試験部

TEL：043-226-2737（内線 6959）

FAX：043-226-2735

## 10. 評価項目

### 10.1. 効果判定とエンドポイントの定義

#### 10.1.1. 用語の定義

- (1) CR：病理学的に子宮内膜異型増殖症・子宮体癌の消失を認めた場合。（病変が消失し、子宮内膜全面搔爬で組織が採取できず、細胞診異常も認めない場合は臨床的に CR と判断する。）
- (2) PR：子宮内膜異型増殖症・子宮体癌は残存しているが、治療に伴う腫瘍腺管の変性がうかがわれ、間質の脱落膜化変化などホルモン効果がある場合。判定困難な異型腺管の残存も PR と判断する。  
異型のない子宮内膜増殖症の存在は PR と判断する。
- (3) SD：間質の脱落膜化変化などホルモン効果を認めず、治療に伴う腫瘍腺管の変性もうかがわれないもの。
- (4) PD：脱分化など、悪性度の上昇が認められた場合。筋層浸潤・転移を疑う場合。なお、登録時の組

組織が子宮内膜異型増殖症で、経過中に高分化型類内膜癌と判断されても悪性度の上昇とは判断しない。

### 10.1.2. MPA 治療の寛解

治療開始後 32 週時点で行った内膜検査の結果 CR の場合、寛解（病理学的な病変の消失）と判定する。第 I 期の効果判定（寛解判定）は、内膜掻爬（32 週時）後の初回外来受診日に行われる。効果判定日まで MPA の服用を継続する。効果判定は内膜掻爬日（32 週来院）から 4 週（28 日）以内に行うこととする（33-36 週時までに判定）。

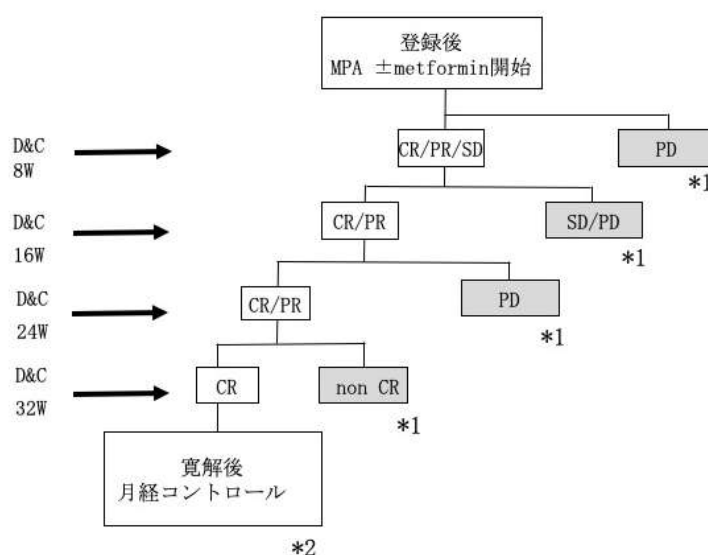

\*1 治験中止

\*2 月経コントロール継続。寛解例は直ちに妊娠許可。  
妊娠希望例は積極的に生殖補助医療をすすめる。

### 10.1.3. 寛解・再発時の中央病理診断

#### 10.1.3.1. 寛解判定

寛解・非寛解の効果判定は施設ごとに行いその後の治療継続を判断する。16.3.病理標本の取扱い で提出された標本で中央病理診断を施行し最終判定をおこなう。「非寛解例」は、PD 等により治験中止となった日もしくは 32 週時の病理検査施行日をイベント発生日と定義する。

- 施設診断において寛解、中央病理診断において非寛解の場合  
非寛解とした病理検査日をもってイベント発生とし、治験中止とする。
- 施設診断において非寛解、中央病理診断において寛解の場合

治験中止とするが、イベント発生とは判定しない。

### 10.1.3.2. 再発判定

「再発」は病理学的に子宮内膜異型増殖症、癌が確認されることとする。経過観察中は施設ごとに再発の判定を行い、臨床的な取り扱いは施設診断で行う。施設診断で再発と判断した場合は治験を中止してよいが、施設診断で判定に迷う場合は、中央病理診断で判断を行う。再発の最終判断は中央病理診断で行う。中央病理診断の結果、施設診断と異なる結果の場合は中央病理診断の結果を優先する。

実施医療機関の判定と中央病理診断が不一致の場合、下記のように対応する。

- (1) 実施医療機関で「再発なし」、中央病理診断で「再発あり」と判断された場合。

中央病理診断の判定結果が実施医療機関に伝達された時点で、当該被験者は治験中止とする。なお、中央病理診断の判定に従い、再発症例として解析される。

- (2) 実施医療機関で「再発あり」、中央病理診断で「再発なし」と判断された場合。

中央病理診断の判定に従い、無再発症例として解析される。施設診断で再発と判断しすでに治験中止となっている場合は、中止日まで無再発期間として解析する。

### 10.1.4. エンドポイントの定義

#### 10.1.4.1. 3年無再発生存割合

全被験者のうち、治験薬・併用薬投与開始日を起点として3年経過時に寛解を得ており、再発を認めない症例の割合として定義する。

治療開始後3年時に妊娠中であり内膜検査ができない場合

- 1) 完了時検査（分娩後8週以内）で再発を認めない場合には、3年時無再発と判断する。
- 2) 完了時検査（分娩後8週以内）で再発だった場合は、最後に内膜検査を施行した日を最終無再発生存確認日とする。ただし、最終無再発生存確認日が開始後144週（約33か月）以降であれば、3年時無再発と判断する。
- 3) 妊娠中で、治療開始後3年経過時に内膜検査ができず、妊娠中に治験期間が終了した場合：最後に内膜検査を施行した日を最終無再発生存確認日とする。最終無再発生存確認日が開始後144週以降

(約 33 か月)であれば、3 年時無再発と判断する。また、治療開始後 3 年時に妊娠 22 週以降であれば、3 年時無再発と判断する。

#### 10.1.5. 寛解・寛解日

32 週時点の内膜検査で、病変の消失が得られれば寛解と判断し MPA 投与を終了する。32 週時点で病変の消失が得られない場合 (CR 以外) はプロトコル治療中止とし、治験を中止する。寛解日は、寛解と判定した最終病理標本の組織を採取した日とする。

#### 10.1.6. 再発 (Relapse)

外来受診日の検査で再発が強く疑われる場合、子宮内膜精密検査を行い確認する。子宮内膜精密検査で、子宮内膜異型増殖症以上の病変が出現した場合に再発と判断する。ただし、外来受診日に組織検査が行われ、再発と確定できる場合は再発と判断してもよい。

施設の判断で再発と判断した場合は、医師が再発と判断した組織を採取した日を再発日とする。施設と中央病理診断の判断が異なる場合でも、その標本を採取した日を再発日とする。

異型のない子宮内膜増殖症は再発とせず、周期的ホルモン治療を施行し経過観察を行う。

#### 10.1.7. 完全奏効割合

プロトコル治療が行われた症例のうち、MPA 寛解例の割合として定義する。

#### 10.1.8. 無再発生存期間

治験薬投与開始日を起点とし、非寛解もしくは再発までの期間として定義する。

「非寛解例」は、PD 等により治験中止となった日もしくは 32 週時の病理検査施行日をイベント発生日と定義する。「再発」は病理学的に子宮内膜異型増殖症、癌が確認されることとする。

再発と判断されていない被験者では、臨床的に再発が無いことを確認した最終日 (最終無再発生存確認日) をもって治験終了とする。なお、治験完了時は画像検査による無増悪の確認は必須としない。

治験終了時に妊娠中の場合は、便宜上無再発と判断し、治験終了時まで無再発生存期間とする。

## 10.2. 主要評価項目

3 年無再発生存割合

### 【主要評価項目の設定根拠】

MPA 療法により寛解を得た患者においては、再発を認めると子宮温存は不可能であり摘出せざるを得ない。よって患者の QOL 確保という観点から考えると、再発を防止し寛解を維持することが最も重要である。

本治験の対象疾患において MPA 療法による寛解から再発までの中央値は 24 か月（4-22 か月）と報告されており、寛解後 1-3 年で再発するケースが殆どである。ヒストリカルコントロールでは 12 か月経過時点での無再発生存割合が 93%、24 か月では 80%、36 か月で 46.8%であり、再発例の 89%は 36 か月までに再発している。このことから、本治験においては治療開始から 3 年経過時点で再発の有無を判断することが、メトホルミンの有効性を評価する上で最も効果的であると考えた。

## 10.3. 副次評価項目

### 【有効性の副次評価項目】

完全奏功割合、無再発生存期間、インスリン抵抗性・BMI 改善割合、妊娠率、妊娠・周産期予後

### 【安全性の副次評価項目】

有害事象の発生頻度

有害事象の評価には「有害事象共通用語規準 v4.0 日本語訳 JCOG 版（NCI-Common Terminology Criteria for Adverse Events v4.0（CTCAE v4.0）の日本語訳）」を用いる。

## 11. 統計学的事項

本治験の統計解析計画の概要を以下にまとめた。なお、統計解析計画の詳細は、統計解析計画書に記載する。統計解析計画書において本治験実施計画書の概要を修正することがあるが、主要評価項目の定義や解析方法が変更される場合には、本治験実施計画書を改訂する。

1  
2  
3  
4  
5  
6  
7  
8  
9  
10  
11  
12  
13  
14  
15  
16  
17  
18  
19  
20  
21  
22  
23  
24  
25  
26  
27  
28  
29  
30  
31  
32  
33  
34  
35  
36  
37  
38  
39  
40  
41  
42  
43  
44  
45  
46  
47  
48  
49  
50  
51  
52  
53  
54  
55  
56  
57  
58  
59  
60

**11.1. 解析対象集団**

**11.1.1. 全登録例**

全登録例を、「6.4. 施設登録及び症例登録・割付方法」に従い登録された患者のうち重複登録や誤登録を除いた集団と定義する。

**11.1.2. 最大の解析対象集団 (full analysis set : FAS)**

本治験に登録され無作為割付された患者で、割付後のデータを有し、主要評価項目について、登録前とそれ以後の測定値を有する患者とする。重大な治験実施計画書違反の患者については除外する。本集団を本治験の主たる解析対象集団とし、本集団に対しては全ての有効性の解析を実施する。

**11.1.3. 治験実施計画書に適合した対象集団 (per protocol set : PPS)**

FAS から、治験方法や併用療法など治験実施計画書の規定に対し以下の重大な違反があった症例を除きプロトコル遵守した被験者を、PPS と定義する。

- 選択基準違反
- 除外基準違反
- 併用禁止薬違反
- 併用禁止療法違反
- コンプライアンス不遵守：  
来院ごとに規定量の薬剤を服用した日数を確認し、服用日数が 80% 以上の場合に服用ありと判断する。服用ありと確認した回数が全体の 75% 以上の場合にコンプライアンス遵守とする。
- 登録時標本の中央病理診断の結果、選択基準（1）を満たさないと判明した症例

**11.1.4. 安全性解析対象集団**

ランダム化割付され、割付後のデータを有する患者とする。本集団に対して全ての安全性の解析を実施する。

**11.2. 目標症例数と設定根拠**

解析対象例数:120 名 (A 群:40 例、B 群:40 例、C 群:40 例)

## 【設定根拠】

本研究の主たる目的は、子宮内膜異型増殖症及び IA 期子宮体癌患者を対象に、MPA 単独群をコントロールとして、MPA+メトホルミン（750mg）群、MPA+メトホルミン（1500mg）群における無再発生存期間を比較することで、有効性の検証とメトホルミンの適切な用量を決定することである。

### 1. 第I期治療の寛解率についての検討

MPA 単独療法の妊孕性温存療法の寛解率は、子宮体癌症例で 76% (Gallos)、78% (Gunderson)、64% (Ushijima)、子宮内膜症異型増殖症例では、86% (Gallos)、86% (Gunderson)、96%(ushijima) となっており、子宮体癌と子宮内膜症異型増殖の療法が混在する場合、平均すると 80.5%となる。一方で、MPA+メトホルミン併用療法では、当院の Phase 2 試験の報告より 9 か月の奏功率は 81%となっている。これらの事から第 I 期の治療の寛解率を 80%と見積もった。

### 2. 第II期治療の寛解から再発についての検討

プロゲスチン療法で病変消失した症例のうち子宮内膜異型増殖症の 38% (Ushijima), 26% (Gallos)、子宮体癌の 57% (Ushijima), 41% (Gallos)に再発を認める。

MPA 単独療法では、寛解から再発までの中央値（50%）は 24 か月と報告されている。また当院のヒストリカルコントロールでは、無再発生存割合の中央値（50%）は 30 か月である。MPA+メトホルミン併用療法では、寛解した 29 例のうち（観察期間の中央値 38 か月）で 3 例（10%）が再発した。

### 3. 症例数の算出

先行研究から、MPA 単独群の無再発率を 60%、MPA+メトホルミン併用群の無再発率を 85%と仮定し、両群共通の設定として、第 1 期での寛解率 80%、第 2 期での途中脱落の確率 5%、妊娠の確率 10%、妊娠期間中に試験終了した場合は試験中無再発例として取扱い、両側有意水準 5%で、検出力 80%とした。以上の設定でシミュレーションによる症例数算出を行った結果、1 群あたり必要な症例数は 40 例、総症例 120 例となった。

1  
2  
3  
4  
5  
6  
7  
8  
9  
10  
11  
12  
13  
14  
15  
16  
17  
18  
19  
20  
21  
22  
23  
24  
25  
26  
27  
28  
29  
30  
31  
32  
33  
34  
35  
36  
37  
38  
39  
40  
41  
42  
43  
44  
45  
46  
47  
48  
49  
50  
51  
52  
53  
54  
55  
56  
57  
58  
59  
60

**11.3. 症例の取り扱い**

原則として登録された症例については、治験調整医師及び統計専門家が協議の上、症例の取り扱いを決定する。新たな問題が起こった場合の症例の取り扱いについても、治験調整医師及び統計専門家が協議の上決定する。

**11.4. データの取り扱い**

欠測値の補完は統計解析計画書にて規定する。疑義が生じた場合は、統計専門家と治験調整医師が協議の上決定する。

**11.5. 統計解析項目及び解析計画**

全ての症例において治験薬の投与が終了し、データが固定された後に解析を行う。全ての有効性評価において、最大の解析対象集団（FAS）における解析を主解析とし、副次的評価として治験実施計画書に合致した解析対象集団（PPS）における解析を行う。安全性の解析は、安全性解析対象集団における解析を実施する。

統計解析の詳細はデータ固定前に別途作成する統計解析計画書に規定する。

**11.5.1. 有効性の解析**

**11.5.1.1. 主要評価項目**

目的

3年時無再発生存期間について、MPA 単独群をコントロールとして、MPA+メトホルミン（750mg）、MPA+メトホルミン（1500mg）を比較し有効性の検証をする。

(1) 解析対象

主たる統計解析の対象群は FAS とする、PPS は FAS の裏づけ資料とするため、解析の項で示したような閉手順はとらず、それぞれの群で比較する。

(2) 解析方法

生存時間の推定：

各群それぞれの無再発生存曲線を Kaplan-Meier 法により推定し、3 年時無再発生存割合とその 95% 信頼区間を Greenwood の公式で求める。

比較検証：

MPA 単独群をコントロール、MPA+メトホルミン（750mg）、MPA+メトホルミン（1500mg）の 3 群について、次の閉手順で検定し検証していく。

閉手順：

- ① MPA 単独群と MPA+メトホルミン（750mg）及び MPA+メトホルミン（1500mg）をプールして Log-rank 検定を実施する。検証する仮説は、単独群に対しメトホルミンの薬効を示すことである。ここで有意ならば次の手順に行き、有意差がなければ終了する。
- ② MPA 単独群と MPA+メトホルミン（1500mg）について、Log-rank 検定を実施する。検証する仮説は、MPA 単独群に対し MPA+メトホルミン（1500mg）の有効性を示すことである。ここで有意ならば、次の手順に行き、有意差がなければ終了する。
- ③ MPA 単独群と MPA+メトホルミン（750mg）について、log-rank 検定を実施する。検証する仮説は、MPA 単独群に対し MPA+メトホルミン（750mg）の有効性を示すことである。ここで有意ならば、次の手順に行き、有意差がなければ終了する。
- ④ MPA+メトホルミン（750mg）と MPA+メトホルミン（1500mg）について、log-rank 検定を実施する。検証する仮説は、MPA+メトホルミン（750mg）に対し MPA+メトホルミン（1500mg）の有効性を示すことである。

#### 11.5.1.2. 副次評価項目

有効性の主要評価項目と同様に重要な有効性の評価項目として、MPA 単独群をコントロール、MPA+メトホルミン（750mg）、MPA+メトホルミン（1500mg）の 3 群の比較検討を行い、メルホトミンの有用性を確認する。

##### (1) 解析対象

主たる解析は FAS とし、PPS は FAS の裏づけ資料とする。

##### (2) 評価項目

第 1 期【MPA 治療：36 週間】治療期の完全寛解

第 2 期【維持治療期：36 週以降、治験終了まで】治療期での無再発生存期間と割合

インスリン抵抗性・BMI、妊娠率、妊娠・周産期予後

### (3) 解析方法

#### ① 第I期【MPA 治療期】治療期の完全寛解の奏功率

MPA 単独群をコントロール、MPA+メトホルミン（750mg）、MPA+メトホルミン（1500mg）の3群の第I期【MPA 治療期】での完全寛解までの期間、完全寛解率を Kaplan-Meier 法で推定し、3群それぞれの比較は Log-rank 検定で実施する。また MPA 単独群とメトホルミン併用群の治験継続の割合とその 95%信頼区間を求める。

#### ② 第II期【維持治療期：寛解判定から治験終了】での無再発生存期間と割合については Kaplan-Meier 法で推定し、3群それぞれの比較は Log-rank 検定で実施する。また年次ごとに無再発の割合のその 95%信頼区間を Greenwood の公式で求める。

#### ③ インスリン抵抗性・BMI

BMI は MPA 投与終了時、及び寛解後 120 週（30 か月）の評価・治験終了時の値を、治療前の値と比較し 3 群間で Paired T-test で比較する。HOMA-R は MPA 投与終了後 48 週（12 か月）後、120 週（30 か月）後、治験終了時の値を、治療前の値を混合効果モデルで使い、LS-mean で各群を比較する。BMI、HOMA-R とも、MPA 投与終了後 48 週（12 か月）後、120 週（30 か月）後、治験終了時に妊娠中は検査値が変動するため欠損値として扱う。

#### ④ 妊娠率

寛解例のうち、妊娠を希望した症例のうち、治験期間中に一度でも妊娠した症例の割合を求める。寛解から初回の妊娠成立までの期間を求める。

なお、本治験で妊娠率を計算する場合の妊娠の定義は、子宮内に胎嚢の確認できたものを妊娠と判断する。妊娠陽性反応のみ認める場合や、異所性妊娠は妊娠率の計算には入れない。

#### ⑤ 妊娠・周産期予後

妊娠例の転帰（流産・死産・生産、転帰週数）を確認。寛解例のうち妊娠を希望した症例のうち、生児を得た症例の割合を求める。寛解から生児獲得までの期間を求める。

また、必要があれば無再発生存期間については、割付因子の調整、層の調整など比例ハザード回帰を含む統計手法を使用して結果を示す。詳細は統計解析計画書に記載をする。

### 11.5.2. 安全性の評価

副次評価項目（Secondary endpoint）として、有害事象の発生割合を評価する。

## 有害事象発生割合

安全性解析集団を対象に、有害事象の発現例数、発現率及びその 95%信頼区間（正確）を算出する。

Grade3 以上の有害事象が発生した項目（神経毒性の場合は Grade2 以上）については発現例数、発現率及びその 95%信頼区間（正確）を算出する。有害事象の Grade 判定は、NCI-CTCAE v4.0 に従う。

### 11.5.3. 中間解析と治験の早期中止

本治験において中間解析は行わない。新たに得られた情報により安全性の観点から治験の継続に問題がある場合もしくは治験薬の有効性が期待できないことが明らかになった場合は、治験の早期中止を検討する。

### 11.6. 独立データモニタリング委員会

本治験では独立データモニタリング委員会を設置する。独立データモニタリング委員会は自ら治験を実施する者と独立した機関として設立され、本治験とは独立した立場である 3 人以上の専門家による委員で構成される。独立データモニタリング委員会は、患者の安全性を確保することを目的に、別途定める独立データモニタリング委員会運営手順に従い治験における安全性モニタリングを行い、その結果を踏まえて下記の点について自ら治験を実施する者に勧告する。

安全性の懸念による、治験デザインの変更または治験薬投与の中止詳細は独立データモニタリング委員会運営手順書にて定める。

### 11.7. 最終解析

追跡期間終了後、データが得られ症例が固定された後に解析を行う。統計解析責任者が「解析報告書」をまとめ、治験調整医師及び治験責任医師に提出する。

## 12. 治験実施計画書の遵守及び逸脱

- (1) 治験責任医師又は治験分担医師は、治験実施計画書から逸脱した行為を理由のいかんによらず全て記録する。
- (2) 被験者の緊急の危機を回避するためその他医療上やむを得ない理由により実施計画書から逸脱した場合、治験責任医師は、逸脱の内容及びその理由を記載した文書を実施医療機関の長に直ちに提

出するとともに、当該文書の内容を実施医療機関の長を経由して治験審査委員会に速やかに報告する。

## 13. 治験実施計画書、症例報告書又は解析計画に関する変更

### 13.1. 治験実施計画書及び症例報告書の改訂

治験実施計画書及び症例報告書を改訂する場合には、以下の手順により行う。

- (1) 治験調整医師及び治験調整委員会は、改訂が必要と認めた場合には、治験責任医師に治験実施計画書改訂案、症例報告書改訂案及び、最新の添付文書、その他必要な資料・情報を提供する。
- (2) 治験調整医師及び治験調整委員会は、治験責任医師が前項により提供された治験実施計画書改訂案等の資料・情報を十分検討し、治験調整医師及び治験調整委員会と協議するのに必要な時間を治験責任医師に与える。
- (3) 治験調整医師及び治験調整委員会と協議した後、治験責任医師は治験実施計画書改訂版及び症例報告書用紙改訂を速やかに実施医療機関の長に提出し、実施医療機関の長を経由して速やかに治験審査委員会の承認を得る。
- (4) 治験審査委員会の意見に基づく実施医療機関の長の指示が治験調整医師及び治験調整委員会の許容できる範囲内で、治験実施計画書及び症例報告書用紙を修正する場合も同様の手順とする。

### 13.2. 統計解析計画の変更

統計解析責任者は、統計解析計画書の内容を変更した場合、変更内容をすべて本治験の統計解析報告書に記載する。なお、統計解析計画書の変更は、その経緯を記録に残す。

## 14. 治験の中止、中断または終了

### 14.1. 治験全体での中止または中断の基準

治験調整医師及び治験調整委員会は、以下の情報が得られ、治験全体の続行が困難であると考えられる時には、治験責任医師と治験全体の中止又は中断について協議のうえ、決定する。

- (1) 予期できない重篤な副作用の発生

- (2) 予期できる重篤な副作用の発生件数、発生頻度、発生条件等の発生傾向がインタビューフォーム・添付文書から予測できないことを示す情報
- (3) 重篤な有害事象のうち因果関係がないと判断されていたが、その後発生数、発生頻度、発生条件等の発生傾向から因果関係が否定できないと判断される情報
- (4) 副作用の発生数、発生頻度、発生条件等の発生傾向が著しく変化したことを示す研究報告
- (5) がんその他の重大な疾病、障害もしくは死亡が発生するおそれがあることを示す研究報告
- (6) 当該治験で有効性が認められないことを示唆する情報
- (7) 治験の対象となる疾患に対して効能もしくは効果を有していないことを示す情報
- (8) 治験薬と同一成分を含む市販医薬品について、製造、輸入又は販売の中止、回収、廃棄その他の保健衛生上の危害の発生又は拡大を防止するための措置の実施の情報

## 14.2. 治験全体での中止又は中断する場合の手続き

治験調整医師または治験調整委員会は、他の治験責任医師と協議のうえ治験全体を中止又は中断する場合には、実施医療機関の長にその旨とその理由を詳細に速やかに文書で通知する。また、投与中の被験者に対して速やかにその旨を伝え、適切な治療への変更等の適切な処理を行うものとする。

## 14.3. 個々の実施医療機関での治験を中止または中断する場合の手続き

治験責任医師は、治験を中止又は中断した場合には、実施医療機関の長に速やかにその旨を文書で通知するとともに、中止又は中断について文書で詳細に説明する。

治験調整医師は、治験責任医師が治験を中止又は中断した旨を通知してきた場合には、中止又は中断について詳細に説明された文書により当該治験に関与するすべての治験責任医師に速やかに文書で通知する。

## 14.4. 治験の終了

治験責任医師は、治験終了後、実施医療機関の長に治験が終了した旨を文書で通知し、治験結果の概要を文書で報告する。

15. データマネジメント

15.1. データマネジメントの手順

データマネジメントに関する詳細な手順については、データマネジメント計画書に記載する。

15.2. データの収集

治験責任医師又は治験分担医師は、21 CFR Part 11、省令 GCP 及び ER/ES 指針の要件に対応した DATATRAK ONE を用い、症例報告書を作成する。治験責任医師又は治験分担医師は、症例報告書の記載内容の変更、修正又は追記に当たっては、DATATRAK ONE 上で行い、全て電子情報として記録する。なお、治験責任医師は、治験分担医師が症例報告書を作成した場合並びに治験協力者が原資料（原データ）から症例報告書に転記した場合には、当該症例報告書が提出される前にその内容について点検し、問題がないことを確認する。自ら治験を実施する者は、最終的に電子症例報告書（写）を電子媒体（CD-R 等）にて医療機関へ提供する。自ら治験を実施する者は、電子症例報告書（写）の見読性、保存性を担保する。

15.3. 症例報告書に直接記載され、かつ原資料（原データ）と解すべき資料の特定

本治験においては、以下の文書などを原資料（原データ）とする。

- (1) 被験者の同意及び被験者への情報提供に関する記録  
診療録、看護記録、臨床検査データ及び画像検査フィルム等症例報告書作成の基となった記録。なお、電子カルテに格納されたデータも原資料とみなす。
- (2) 治験薬投与に関する記録
- (3) 本治験に関連する指針上必要な治験に係る文書又は記録

症例報告書に記載されたデータのうち、以下に示す項目は症例報告書の記載をもって原資料（原データ）とする。ただし、診療録等に記載のある場合は、当該診療録等を原資料（原データ）とみなす。

- (1) 併用薬・併用療法の目的
- (2) 有害事象の程度、転帰（追跡調査時の結果を含む）、重篤度、本治験薬との因果関係の有無
- (3) 被験者の治験中止理由

(4) 治験責任医師又は治験分担医師のコメント

## 16. 原資料及びその他の記録の取扱い

### 16.1. 治験実施医療機関による記録の保存

GCP に規定される治験実施医療機関において保存すべき治験に係る文書又は記録は、病院長が次の日のうちいずれかの遅い日までの期間保存する。

- 1) 当該被験薬の当該効能・効果に係る製造販売承認日（開発が中止された場合には、開発中止が決定されてから 3 年が経過した日）
- 2) 治験の中止又は終了後 3 年が経過した日

治験責任医師は、治験実施医療機関又は治験審査委員会が保存すべき記録について保存が不要となった場合、治験実施医療機関に通知する。

### 16.2. 治験責任医師による記録の保存

GCP に規定される治験責任医師が保存すべき治験に係る文書又は記録は、適切と判断される保管場所において、次のうちいずれか遅い日までの期間保存する。

- 1) 当該被験薬の当該効能・効果に係る製造販売承認日から 5 年が経過した日（開発が中止された場合には開発中止が決定された日から 3 年が経過した日）。ただし、薬事法の規定により承認後の再審査を受けなければならない医薬品で、かつ再審査が終了するまでの期間が 5 年を超えるものについては、再審査が終了する日。
- 2) 治験の中止又は終了後 3 年が経過した日。

### 16.3. 病理標本の取扱い

中央病理診断を行うため、治験調整事務局に病理標本を送付する。中央病理診断は手順書に従い行う。検討が必要な検体については中央病理判定委員会を年 1 回開催、標本をレビューして中央病理診断とする。実施医療機関と中央病理判定委員会の診断結果が異なる場合の取り扱いについては 6.4.4. 及び 10.1.3. に記載のとおりとする。

施設からの標本提供にあたっては、提出元となる各施設が定める院内規程・手続きに従うことを原則とする。提出する標本は、可能であれば複製したものを送付する。標本は登録番号と採取時期（登録

時、8 週、16 週、24 週、32 週、3 年、再発時等）のみ記載し診療録番号、氏名等は記載しない。標本は治験終了まで治験調整事務局で保管する。標本提供の手順は、別途作成する手順書に従う。

当該標本が、登録施設以外の医療施設等からの借用標本で複製不能であり、施設における組織再採取が適応でないために借用標本の「又貸し」を要する場合も、これを行うか否かについて当該施設の院内規程がまず優先されるべきであることは同様である。院内規程が明確でない場合、病理中央診断が終了（診断固定完了）後に返却することを前提として、治験責任医師の責任において借用標本の提出を受けることを妨げるものではない。院外へ標本の貸出ができない場合や、借用標本が不十分であると施設で判断された場合は、施設にて組織を再採取し標本作製を行う。

標本は①MPA 投与終了後（登録時、MPA 投与 8 週、MPA 投与 16 週、MPA 投与 24 週、MPA 投与 32 週の標本をまとめて送付）、②第Ⅱ期 120 週時（登録後 3 年時）、③再発疑い及び再発時に送付する。

詳細な手順については、別途手順書に記載する。

## 17. 原資料の直接閲覧

治験実施医療機関の長及び治験責任医師は、モニタリング、監査及び治験審査委員会又は規制当局による調査の際に、原資料等すべての記録を閲覧できることを保証する。治験が適切に実施されていること及びデータの信頼性が十分に確保されていることを確認する。直接閲覧の方法、実施時期についてはモニタリング手順書に別途定める。

## 18. 治験の品質管理及び品質保証

### 18.1. 品質管理

モニターがモニタリングを行い、治験実施医療機関において治験が治験実施計画書及びGCPを遵守して適切に行われていることを確認する。また、原資料（原データ）等の治験関連記録を直接閲覧し、症例報告書その他の報告書の記載内容が正確であることを確認する。モニター、データマネジメント担当者及び統計解析担当者が、データ取扱いの各段階をそれぞれ点検・確認する。

## 18.2. 品質保証

治験の実施並びにデータ作成、記録及び報告が治験実施計画書及び GCP を遵守して適切に行われていること保証するために、モニタリングを担当する部門を含む治験に関わる部門から独立した監査担当者が、治験実施医療機関及び治験の実施に係わるその他の施設において監査を行い、品質管理が適切に行われていることを確認する。

## 19. 倫理及び GCP

### (1) 遵守すべき規制要件

本治験の実施に際しては「ヘルシンキ宣言」に基づく倫理的原則、「医薬品の臨床試験の実施の基準に関する省令」(GCP)、及びその他の関連する規制要件を遵守するものとする。

### (2) 人権への配慮 (個人情報の保護)

治験実施に係る生データ類および同意書等を取り扱う際には、被験者の秘密保護に十分配慮する。治験結果を公表する場合には、被験者を特定できる情報を含めないようにする。本治験の目的以外に、治験で得られた被験者のデータを使用しない。

あらかじめ被験者の同意を得ないで、同意説明文書で特定された利用目的の達成に必要な範囲を超えて、個人情報を取り扱わない。

### (3) 安全性・不利益への配慮

有害事象発生時は、速やかに適切な診察及び処置を行う。夜間休日でも迅速に対応できる体制を取る。有徳な有害事象が発生した場合は、集中治療室で対応する。

## 20. 治験審査委員会

本治験の実施に先立ち、実施医療機関の治験審査委員会は、本治験の倫理的、科学的及び医学的妥当性を審査する。本治験は、治験審査委員会の承認を得た後に実施する。治験審査委員会の審議結果が「修正の上で承認する」であった場合には、審議結果に基づいて実施計画書又は症例報告書、同意説明文書等を修正し承認した後、本治験を実施する。また、治験審査委員会は少なくとも 1 年に 1 回以上の頻度で本治験が適切に実施されているか否かを継続的に審査する。

21. 健康被害補償及び保険

21.1. 健康被害の補償

本治験に参加した結果として被験者に健康被害が生じた場合、実施医療機関はその治療に関する医療体制の提供など必要かつ適切な処置を行う。本治験に起因する健康被害により生じた賠償責任、補償責任への対応として、健康被害の補償のための手順書に従い、医師主導治験保険に加入する。

補償の範囲、条件等は契約する保険の内容に準ずるものとする。なお、健康被害が被験者の故意または過失によるものと判明した場合、補償の対象外となることがある。

21.2. 賠償保険への加入

賠償責任に備え、治験責任医師及び治験分担医師は医師賠償責任保険に加入する。さらに、実施医療機関においても病院賠償責任保険等に加入する。

22. 金銭の支払い

被験者に対して、負担軽減費等の費用を支払う場合は、各治験実施医療機関が別途定める規則に従い、被験者に支払うものとする。

23. 研究結果の発表

主たる論文、学会発表は、最終解析終了後に独立データモニタリング委員会の承認を経て、専門誌（英文）に投稿、あるいは専門学会に発表する。

23.1. 論文発表の authorship 等に関する取り決め

原則として論文発表に関する authorship は以下のとおりとする。

治験結果の公表論文の筆頭著者は治験調整医師（当該プロトコルの発案者）、以下症例登録数が最も多かった施設の実務担当者もしくは代表者（該当施設内の筆頭者の選択は、その施設の判断による。ただし、研究に最も貢献した者を原則とする）、統計解析責任者、中央病理事務局責任者とする。それ以下は、論文の投稿規定による制限に従い、登録数の多い順に選び共著者とする。また最終著者は治験調整事務局とする。

すべての共著者は、投稿前に review し、発表内容に合意した者のみとする。内容に関して議論しても合意が得られない場合、治験調整医師はその研究者を共著者に含めないことができる。

学会発表は複数回に及ぶ可能性があり、1.治験調整医師、2.症例登録数が最も多かった施設の代表者、3.登録数が多い順の施設代表者の優先順位で発表する権利を与える。

## 23.2. データ公開について

ヘルシンキ宣言に従い、本治験に関するデータの公開を行うものとする。なお、公開の範囲は、以下の通りとする。

jRCT に、治験の概要を公開する。治験実施計画書、同意説明文書、統計解析計画書等も公開する。治験の結果および総括報告書については、試験終了後に公開する。

## 24. 資金及び利益の衝突

本治験は AMED との契約に基づいて実施され、治験調整医師及び治験責任医師により公正に行われる。また、治験薬は日本新薬株式会社より有償にて提供される。本治験の計画・実施・報告において治験の結果及び結果の解釈に影響を及ぼすような「起こりえる利益の衝突」は存在しないこと、また治験の実施が被験者の権利・利益を損ねることがないことを確認する。

## 25. 治験実施体制

別紙 1 を参照。

## 26. 参考資料・文献リスト

1. 日本産科婦人科学会婦人科腫瘍委員会報告：2014 年度子宮体癌患者年報. 日産婦誌 2016; 68:1117-1160.
2. Bianchini F, Kaaks R, Vainio H: Overweight, obesity, and cancer risk. *Lancet Oncol* 2002; 3:565–74.
3. Renehan AG, Tyson M, Egger M, et al: Body-mass index and incidence of cancer: a systematic review and meta-analysis of prospective observational studies. *Lancet* 2008; 371:569–78.
4. Liao C, Zhang D, Mungo C, Tompkins DA, Zeidan AM (2014) Is diabetes mellitus associated with increased incidence and disease-specific mortality in endometrial cancer? A systematic review and meta-analysis of cohort studies. *Gynecol Oncol* 135:163-171
5. Lukanova A, Zeleniuch-Jacquotte A, Lundin E, et al: Prediagnostic levels of C-peptide, IGF-I, IGFBP -1, -2 and -3 and risk of endometrial cancer. *Int J Cancer* 2004; 108:262-8.
6. Cust AE, Allen NE, Rinaldi S, et al: Serum levels of C-peptide, IGFBP-1 and IGFBP-2 and endometrial cancer risk; results from the European prospective investigation into cancer and nutrition. *Int J Cancer* 2007; 120:2656-64.
7. Calle EE, Kaaks R: Overweight, obesity and cancer: epidemiological evidence and proposed mechanisms. *Nat Rev Cancer* 2004; 4:579-91.
8. Sharma D, Saxena NK, Vertino PM, et al: Leptin promotes the proliferative response and invasiveness in human endometrial cancer cells by activating multiple signal-transduction pathways. *Endocr Relat Cancer* 2006; 13:629-40.
9. Nevadunsky NS, Van Arsdale A, Strickler H D et al. Obesity and age at diagnosis of endometrial cancer. *Obstet Gynecol*; 124:300-6.
10. Mitsuhashi A, Uehara T, Hanawa S, Shozu M. Prospective evaluation of abnormal glucose metabolism and insulin resistance in patients with atypical endometrial hyperplasia and endometrial cancer. *Support Care Cancer*. 2017 ;25 (5) :1495-1501.
11. Trimble CL, Kauderer J, Zaino R, et al: Concurrent endometrial carcinoma in women with a biopsy diagnosis of atypical endometrial hyperplasia. *Cancer* 2006; 106:812-9.
12. 日本婦人科腫瘍学会編: 子宮体がん治療ガイドライン 2018 年版. 金原出版, 2018

13. Gallos ID, Yap J, Rajkhowa M, et al: Regression, relapse, and live birth rates with fertility-sparing therapy for endometrial cancer and atypical complex endometrial hyperplasia: a systematic review and metaanalysis. *Am J Obstet Gynecol* 2012; 207:266 e1-266 e12.
14. Gunderson CC, Fader AN, Carson KA, Bristow RE. Oncologic and reproductive outcomes with progestin therapy in women with endometrial hyperplasia and grade 1 adenocarcinoma: a systematic review. *Gynecol Oncol* 2012; **125**: 477-82.
15. Ushijima K, Yahata H, Yoshikawa H, et al: Multicenter phase II study of fertility-sparing treatment with medroxyprogesterone acetate for endometrial carcinoma and atypical hyperplasia in young women. *J Clin Oncol* 2007; 25:2798-803.
16. Kaku T, Yoshikawa H, Tsuda H, et al: Conservative therapy for adenocarcinoma and atypical endometrial hyperplasia of the endometrium in young women: central pathologic review and treatment outcome. *Cancer Lett* 2001; 167:39-48.
17. Ota T, Yoshida M, Kimura M, et al: Clinicopathologic study of uterine endometrial carcinoma in young women aged 40 years and younger. *Int J Gynecol Cancer* 2005; 15:657-62.
18. Niwa K, Tagami K, Lian Z, et al: Outcome of fertility-preserving treatment in young women with endometrial carcinomas. *BJOG* 2005; 112:317-20.
19. Yahata T, Fujita K, Aoki Y, et al: Long-term conservative therapy for endometrial adenocarcinoma in young women. *Hum Reprod* 2006; 21:1070-5.
20. Minaguchi T, Nakagawa S, Takazawa Y, et al: Combined phospho-Akt and PTEN expressions associated with post-treatment hysterectomy after conservative progestin therapy in complex atypical hyperplasia and stage Ia, G1 adenocarcinoma of the endometrium. *Cancer Letters* 2007; 248:112-22.
21. Yamazawa K, Hirai M, Fujito A, et al: Fertility-preserving treatment with progestin, and pathological criteria to predict responses, in young women with endometrial cancer. *Human Reprod* 2007; 22:1953-8.
22. Fujiwara H, Jobo T, Takei Y, et al: Fertility-sparing treatment using medroxyprogesterone acetate for endometrial carcinoma. *Oncol Lett* 2012; 3:1002-6.
23. Salpeter SR, Buckley NS, Kahn JA, et al: Meta-analysis: metformin treatment in persons at risk for diabetes mellitus. *Am J Med* 2008; 121:149-57 e2.
24. Owen MR, Doran E, Halestrap AP: Evidence that metformin exerts its anti-diabetic effects through inhibition of complex 1 of the mitochondrial respiratory chain. *Biochem J* 2000; 348 Pt 3:607-14.

1  
2  
3  
4  
5  
6  
7  
8  
9  
10  
11  
12  
13  
14  
15  
16  
17  
18  
19  
20  
21  
22  
23  
24  
25  
26  
27  
28  
29  
30  
31  
32  
33  
34  
35  
36  
37  
38  
39  
40  
41  
42  
43  
44  
45  
46  
47  
48  
49  
50  
51  
52  
53  
54  
55  
56  
57  
58  
59  
60

25. Giannarelli R, Aragona M, Coppelli A, et al: Reducing insulin resistance with metformin: the evidence today. *Diabetes Metab* 2003; 29:6S28-35.

26. Matthaei S, Reibold JP, Hamann A, et al: In vivo metformin treatment ameliorates insulin resistance: evidence for potentiation of insulin-induced translocation and increased functional activity of glucose transporters in obese (fa/fa) Zucker rat adipocytes. *Endocrinology* 1993; 133:304-11.

27. Musi N, Hirshman MF, Nygren J, et al: Metformin increases AMP-activated protein kinase activity in skeletal muscle of subjects with type 2 diabetes. *Diabetes* 2002; 51:2074-81.

28. Evans JMM, Donnelly LA, Emslie-Smith AM, et al: Metformin and reduced risk of cancer in diabetic patients. *BMJ* 2005; 330:1304-5

29. Quinn BJ, Kitagawa H, Memmott RM, Gills JJ, Dennis PA. Repositioning metformin for cancer prevention and treatment. *Trends Endocrinol Metab.* 2013;24: 469–80.

30. Pernicova I, Korbonits M. Metformin--mode of action and clinical implications for diabetes and cancer. *Nat Rev Endocrinol* 2014; 10:143-56.

31. Jiralerspong S, Palla SL, Giordano SH, et al: Metformin and pathologic complete responses to neoadjuvant chemotherapy in diabetic patients with breast cancer. *J Clin Oncol* 2009; 27:3297-302.

32. Mitsuhashi A, Kiyokawa T, Sato Y, Shozu M. Effects of metformin on endometrial cancer cell growth in vivo: a preoperative prospective trial. *Cancer* 2014; 120: 2986-95.

33. Ko EM, Walter P, Jackson A, et al. Metformin is associated with improved survival in endometrial cancer. *Gynecol Oncol.* 2014; 132:438–42.

34. Nestler JE: Metformin for the Treatment of the Polycystic Ovary Syndrome. *N Engl J Med* 2008; 358:47-54.

35. Mitsuhashi A, et al. A phase II study of medroxyprogesterone acetate plus metformin as fertility-sparing treatment for atypical endometrial hyperplasia and endometrial cancer. *Ann Oncol* 2016; 27:262-266.

【千葉大学医学部附属病院】治験実施計画書番号：Chiba-Met003 1.0 版（2019 年 5 月 24 日）  
説明文書・同意書 1.0 版（2019 年 5 月 24 日）

よくお読みください

被験者用

患者さんへ

子宮内膜異型増殖症・子宮体癌に対する  
メドロキシプロゲステロンとメトホルミンの  
併用妊孕性温存療法の用量反応性試験  
FELICIA Trial

～説明および同意文書～

この冊子には、「メトホルミン」という薬の、効果や安全性を確かめるための臨床試験（<sup>ちけん</sup>治験）についての詳しい説明が書かれています。

この冊子をよくお読みになり、この治験の目的や方法、お薬について十分に理解されたうえで、治験に参加されるか否かを決めてください。担当医師の説明やこの説明文書の中で、わからないことや心配なことなどがありましたら、どんなことでも遠慮なくお尋ねください。

目次

1. <sup>ちけん</sup>治験とは？ ..... 3

2. 子宮内膜異型増殖症・子宮体癌とメトホルミン(グリコラン<sup>®</sup>錠)について .... 4

3. 治験の目的 ..... 6

4. 対象となる患者さん・対象とならない患者さん ..... 6

5. この治験の進め方 ..... 7

6. 治験に参加する予定人数 ..... 15

7. 治験の利益・不利益 ..... 15

8. この治験に参加しない場合の、他の治療法 ..... 16

9. 治験への参加を中止する場合について ..... 16

10. 新たに重要な情報が得られた場合について ..... 17

11. 治験に関連した健康被害の治療について ..... 17

12. 治験に参加された場合の費用について ..... 18

13. カルテなどの医療記録の閲覧と秘密の保全について ..... 19

14. 治験に参加いただくことは自由です ..... 20

15. 患者さんに守っていただきたいことについて ..... 20

16. 知的財産権と利益相反について ..... 21

17. 治験を審査する委員会 ..... 21

18. 治験に関する相談窓口 ..... 22

【千葉大学医学部附属病院】治験実施計画書番号：Chiba-Met003 1.0 版（2019 年 5 月 24 日）  
説明文書・同意書 1.0 版（2019 年 5 月 24 日）

## 1. 治験<sup>ちけん</sup>とは？

新しい医薬品が世の中に出て、多くの患者さんに使われるためには、国から承認を得ることが必要とされています。そのため、その効果と安全性を何段階にもわたって慎重に調べます。まずは試験管での実験や動物実験によって医薬品の候補の効果と安全性が確認されます。その後、健康な方や患者さんに使っていただき、効果や安全性を詳しく調べます。

このように、開発の最終段階において、人を対象に効果や安全性を確かめ、厚生労働省に「医薬品」として認めてもらうため、申請の資料を集めることを目的とした試験を「治験」、その治験で使われるお薬を「治験薬<sup>ちけんやく</sup>」と呼んでいます。

治験は、一般の治療と異なり、研究的な側面があります。そのため、治験は参加された方の安全や人権を守るために、「医薬品、医療機器等の品質、有効性及び安全性の確保等に関する法律（略称：薬機法）」という法律と、厚生労働省が定めた「医薬品の臨床試験の実施の基準に関する省令（GCP）」に基づいて行われます。また、当院の治験審査委員会（治験について審査する委員会）で、この治験の内容に問題がないか、患者さんの人権が十分に守られているか事前に審議されたいうで、治験の実施が認められています。

## 2. 子宮内膜異型増殖症・子宮体癌とメトホルミン(グリコラン<sup>®</sup>錠)について

### ＜子宮内膜異型増殖症・子宮体癌について＞

子宮内膜異型増殖症とは、子宮内膜という組織が厚く増殖し、子宮内膜の細胞に異型が認められる疾患です。子宮体癌の前がん状態と考えられており、子宮内膜異型増殖症の 4 割程度は、すでに子宮体癌を合併しているといわれています。

子宮体癌は、子宮体部に発生したがんで、そのほとんどはホルモンの作用を受けて月経を起こす子宮内膜から発生するため、子宮内膜癌とも呼ばれます。

### ＜標準的な治療方法＞

子宮内膜異型増殖症は、子宮温存療法を希望される場合はメドロキシプロゲステロン（MPA）を使った治療が行われますが、子宮温存療法を希望しない場合は、手術が標準治療となっています。

子宮体癌の治療の主体は、手術療法です。しかし、子宮温存療法を希望され、高分化型の類内膜癌でがん細胞が子宮内膜にとどまっている場合に限って、MPA を使った子宮温存療法が許容されています。

## ＜標準治療の問題点＞

MPA 療法は、子宮の温存を希望する患者さんに対し、現時点で一般的に行われる治療法ですが、一旦がんがなくなった後に再発したり、再発を抑える期間が十分でないという報告もあります。また、わが国で行われた臨床試験の結果から 22 人の患者さんが参加されて MPA 療法を受けられましたが、治療開始から 3 年後には 3 分の 2 の患者さんが再発し手術を受けられたという報告があります。多数の温存療法の成績をまとめた論文によると、ホルモン治療で子宮内膜異型増殖症では 85%ほど一旦病変がなくなりますが、そのうち 30%近く再発します。子宮体癌では 60-80%ほど病変がなくなりますが、そのうち 40%ほど再発すると報告されています。このように、子宮温存療法は現在の治療方法だけでは十分とはいえない現状があります。

## ＜治験薬について＞

この治験で使用する薬（治験薬）は「メトホルミン（商品名：グリコラン<sup>®</sup>錠）」といいます。メトホルミンは世界で 50 年以上前から糖尿病治療薬の第一選択薬として一般に広く使用されています。食事や運動療法後、最初に使われる薬剤で、海外では糖尿病の予防にも使われています。

近年、メトホルミンを服用している糖尿病患者さんは、服用していない人に比較してがんの発生が少ないことが報告されています。また、メトホルミンは、がん細胞を使った実験で、がんの増殖を抑える作用が報告されました。また、メトホルミンは<sup>たのうほう</sup>多嚢胞卵巣症候群（PCOS）の患者さんの不妊治療のさい、排卵誘発剤としても使用されており、排卵誘発や妊娠率の改善も期待されています。

子宮体癌の子宮温存療法では、従来の MPA 療法にメトホルミンを同時に使用したところ、一旦がんが消えたあとの再発が少なくなったという報告があります。ただ、この効果はまだ十分に証明されていません。

### 3. 治験の目的

この治験の目的は、子宮温存を希望する子宮内膜異型増殖症・子宮体癌の患者さんに対し MPA とメトホルミンを併用する新しい治療法において、メトホルミンの適切な用量を調べ、有効性及び安全性を確認することです。

### 4. 対象となる患者さん・対象とならない患者さん

今回の治験では、次の全ての事項に該当する患者さんにご参加をお願いしています。

- ① 子宮体癌または子宮内膜異型増殖症で、子宮温存療法の適応となる方
- ② 同意取得時の年齢が 20 歳以上 42 歳以下の方
- ③ 全身状態が良好な方
- ④ 高用量黄体ホルモンによる治療など、子宮体癌または子宮内膜異型増殖症の治療を受けたことがない方
- ⑤ 登録前の検査値が基準値範囲である方
- ⑥ 治験で使用する薬剤（MPA、メトホルミン）に対してアレルギー反応がない方
- ⑦ 治験参加について、ご本人より文書で同意が得られている方

一方、次のいずれかの事項に該当する患者さんはご参加いただけません。

- ① 治験で使用する薬剤（MPA、メトホルミン）が使用できない方
  - ・乳酸アシドーシスを起こしやすい方
  - ・重症ケトーシス、糖尿病性昏睡または前昏睡、Ⅰ型糖尿病の方
  - ・重症感染症、手術前後、重篤な外傷のある方
  - ・栄養不良状態、飢餓状態、衰弱状態、脳下垂体機能不全または副腎機能不全の方
  - ・妊婦または妊娠している可能性のある女性
  - ・本治療薬剤に過敏症の経験がある方
  - ・これまで血栓ができたことがある方

【千葉大学医学部附属病院】治験実施計画書番号：Chiba-Met003 1.0 版（2019 年 5 月 24 日）  
説明文書・同意書 1.0 版（2019 年 5 月 24 日）

- 診断未確定の性器出血、尿路出血、乳房病変のある方
  - 重篤な肝障害のある方
  - 高カルシウム血症と診断されている方
- ② 精神病または精神症状を有する方
  - ③ コントロール不良の糖尿病の方
  - ④ メトホルミンを服用している糖尿病の方（食事・運動療法、メトホルミン以外の内服薬の服用は可）
  - ⑤ 活動性の重複癌を有する方
  - ⑥ ステロイド剤の継続的な全身投与（内服または静脈内）をうけている方
  - ⑦ その他、主治医が不適格と判断した方

治験の参加に同意をいただいた後、詳しい検査を行い、治験にご参加いただけるかを判断させていただきます。

そのため、同意をいただいた後でも治験に参加していただけなくなる場合や、治験が始まった後でも医師の判断により治験を中止させていただく場合がありますので、ご了承ください。

## 5. この治験の進め方

この治験は、MPA とメトホルミンを併用するⅠ期と、メトホルミンのみを服用するⅡ期に分けられます。

治験に登録された 120 名の患者さんを以下の 3 つの群にランダムに割り当て、治験を開始します。どの群になるかは、事前には分かりません。

- A 群：MPA 単独群（40 名） ※この群では、メトホルミンを服用しません。
- B 群：MPA＋メトホルミン 750mg 投与群（40 名）
- C 群：MPA＋メトホルミン 1500mg 投与群（40 名）

【千葉大学医学部附属病院】治験実施計画書番号：Chiba-Met003 1.0 版（2019 年 5 月 24 日）  
説明文書・同意書 1.0 版（2019 年 5 月 24 日）

第Ⅰ期では、4 週間ごとに来院していただき、定められた検査・診察を受けていただきます。8 週間ごとに子宮内膜組織診を行い、病変の消失を観察します。32 週目に行う検査で病変が消失した場合は、寛解と判断され、第Ⅱ期に移行します。（36 週の来院時に検査結果をお伝えします。）この検査で寛解していないと判断された場合は、治験を中止していただきます。

第Ⅱ期は、36 週目から始まります。第Ⅰ期と同じように、処方された薬を持ち帰り、忘れないように服用を続けてください。第Ⅱ期では、第Ⅰ期で処方されていた MPA は服薬しませんが、必要に応じて月経コントロール薬を服用していただきます。妊娠を希望する場合は月経コントロールを行いませんので、担当医にお伝えください。妊娠された場合は出産するまで、妊娠を希望しない場合や流産などの場合は本治験の終了（最長 5.5 年）まで、あなたが治験への参加を取りやめない限り治験を継続します。

この治験の流れを以下に示します。

## 各群の進め方

### 【A群：MPA単独群（メトホルミン非投与群）】

#### ➤ 第Ⅰ期 治療開始から36週まで

A群に割り当てられた方は、MPAを、処方された翌日の朝から服用していただきます。

MPAの用量は1日に200mg×3回、合計600mgです。

4週ごとに来院していただきますが、来院時に処方される薬を持ち帰り、忘れないように服用を続けてください。もし飲み忘れてしまった場合は、お渡しする「服薬日誌」に記載してください。

32週目の検査で、病変が消失したかどうかを確認します。36週来院時に結果をお伝えします。この時点で消失が認められれば「寛解」と判定し、寛解した患者さんは第Ⅱ期の治療に移行していただきます。

#### ➤ 第Ⅱ期 36週以降、最長5.5年まで

妊娠を希望されない場合は、必要に応じ、無排卵・月経不順を改善するためにピルなどのホルモン剤を服用し月経コントロールを行います。妊娠を希望される患者さんは月経コントロールを行いませんので、担当医にお伝えください。

### 【B群：MPA＋メトホルミン750mg群】

#### ➤ 第Ⅰ期 治療開始から36週まで

MPAとメトホルミンを、処方された翌日の朝から服用していただきます。

MPAを1日に200mg×3回、合計600mgを服用します。

メトホルミン（グリコラン錠250mg）を、下記の表1に従い、有害事象がないか確認し、1ヶ月後に増量します。有害事象が発生した場合はお薬の服用をお休みしたり、用量段階を下げて減量して服用していただく場合がありますので、担当医の指示に従って服用してください。

4週ごとに来院していただきますが、来院時に処方される薬を持ち帰り、忘れないように服用を続けてください。もし飲み忘れてしまった場合は、お渡しする「服薬日誌」に記載してください。

32週目の検査で、病変が消失したかどうかを確認します。36週来院時に検査の結果をお伝えします。この時点で消失が認められれば「寛解」と判定し、寛解した患者さんは第Ⅱ期の治療に移行していただきます。

表1 B群のメトホルミン服用調節

| 用量調節段階 | メトホルミン投与量 | 1回服用量×回数   |
|--------|-----------|------------|
| 1段階    | 500mg     | 250mg×1日2回 |
| 2段階    | 750mg     | 250mg×1日3回 |

- 第Ⅱ期 36週以降、最長5.5年まで
- 妊娠を希望されない場合は、必要に応じ、無排卵・月経不順を改善するためにピルなどのホルモン剤を服用し月経コントロールを行います。妊娠を希望される患者さんは月経コントロールを行いませんので、担当医にお伝えください。
- メトホルミンの服用は、第Ⅰ期と同じ用量で続けていただきます。B群の患者さんは最大投与量を750mgとして、治験終了あるいは、再発などで試験中止となるまで服用を継続します。妊娠を希望される場合、メトホルミンは妊娠が分かった時点で服用を中断します。妊娠の可能性があると分かったら、担当医までお知らせください。

【C群：MPA＋メトホルミン1500mg群】

- 第Ⅰ期 治療開始から36週まで
- MPAとメトホルミンを、処方された翌日の朝から服用していただきます。MPAを1日に200mg×3回、合計600mgを服用します。
- メトホルミン（グリコラン錠250mg）を、下記の表2に従い、有害事象がないか確認しながら1ヶ月ごとに増量します。有害事象が発生した場合はお薬の服用をお休みしたり、用量段階を下げて減量して服用していただく場合があるので、担当医の指示に従って服用してください。

【千葉大学医学部附属病院】治験実施計画書番号：Chiba-Met003 1.0 版（2019 年 5 月 24 日）  
 説明文書・同意書 1.0 版（2019 年 5 月 24 日）

表2 C群のメトホルミン服用調節

| 用量調節段階 | メトホルミン投与量 | 1回服用量×回数   |
|--------|-----------|------------|
| 1段階    | 500mg     | 250mg×1日2回 |
| 2段階    | 750mg     | 250mg×1日3回 |
| 3段階    | 1500mg    | 500mg×1日3回 |

➤ 第Ⅱ期 32週以降、最長5.5年まで

妊娠を希望されない場合は、必要に応じ、無排卵・月経不順を改善するためにピルなどのホルモン剤を服用し月経コントロールを行います。妊娠を希望される患者さんは月経コントロールを行いませんので、担当医にお伝えください。

メトホルミンを第Ⅰ期と同じ用量で続けていただきます。C群の患者さんは最大投与量を1500mgとして、治験終了あるいは、再発などで試験中止となるまで服用を継続します。妊娠を希望される場合、メトホルミンは妊娠が分かった時点で服用を中断します。妊娠の可能性があると分かったら、担当医までお知らせください。

## メトホルミンを中断する場合や併用注意のお薬について

B群もしくはC群に割り当てられて、メトホルミンを服用する患者さんは次に該当する場合は一旦服用を中断して、担当医に報告してください。症状が改善したら再開していただきます。

- ① 食事を抜いたとき、食事が不規則または食事が十分に摂れていないとき
- ② 発熱を認める場合
- ③ 重症の感染症や外傷の場合
- ④ 下痢・嘔吐などの胃腸障害で脱水の危険がある場合
- ⑤ 過度のアルコール摂取をした場合
- ⑥ 激しい筋肉運動をした場合
- ⑦ コード造影剤を用いた検査が予定されている場合
- ⑧ 体調不良を認める場合

1  
2  
3  
4  
5  
6  
7  
8  
9  
10  
11  
12  
13  
14  
15  
16  
17  
18  
19  
20  
21  
22  
23  
24  
25  
26  
27  
28  
29  
30  
31  
32  
33  
34  
35  
36  
37  
38  
39  
40  
41  
42  
43  
44  
45  
46  
47  
48  
49  
50  
51  
52  
53  
54  
55  
56  
57  
58  
59  
60

他の診療科や医療機関などから他のお薬を処方された場合、併用に注意する  
場合があるので、治験に参加していることを伝え、医師に確認してください。プリ  
モボラン等のタンパク同化ステロイド、アスピリン等のサリチル酸剤、インデラ  
ル等のプロプラノロールβ遮断剤などは血糖下降作用を増強させることがあり注  
意が必要とされます。腎臓に影響する薬剤などを服用する場合も一旦メトホルミ  
ンの服用は中断していただきます。

本試験では MPA 服用中の血栓予防にアスピリンを少量併用することがありま  
す。メトホルミンとの併用に注意するお薬ですが、少量であり問題ないと考えま  
す。

peer review only

【千葉大学医学部附属病院】治験実施計画書番号：Chiba-Met003 1.0 版（2019 年 5 月 24 日）  
 説明文書・同意書 1.0 版（2019 年 5 月 24 日）

## 検査スケジュール

検査等のスケジュールを表 3、表 4 に示します。

表 3 治験スケジュール（第Ⅰ期：MPA 治療期）

| 観察時期                  | スクリーニング<br>登録前  | MPA治療期（0～36週）   |                 |                 |     | 中止<br>時 |
|-----------------------|-----------------|-----------------|-----------------|-----------------|-----|---------|
|                       |                 | 0週              | 4、12、<br>20、28週 | 8、16、<br>24、32週 | 36週 |         |
| 許容範囲（日）               | -28             | +14             | -7～+14          | -7～+14          | -21 | +14     |
| 文書による同意               | ●               |                 |                 |                 |     |         |
| 登録・割付                 |                 | ●               |                 |                 |     |         |
| 治験薬・併用薬の処方            |                 | ● <sup>*1</sup> | ●               | ●               |     |         |
| 患者背景                  | ●               |                 |                 |                 |     |         |
| 身体所見                  | ●               |                 |                 | ●               |     | ●       |
| 服薬状況確認                |                 |                 | ●               | ●               | ●   | ●       |
| 子宮内膜組織診<br>（麻酔下全面搔爬術） | ●               |                 |                 | ●               |     |         |
| 効果判定 <sup>*2</sup>    |                 |                 |                 | ●               |     |         |
| 血液検査（血算、生化学）          | ● <sup>*3</sup> |                 | ●               | ● <sup>*3</sup> |     | ●       |
| 血糖検査 <sup>*3</sup>    | ●               |                 |                 | ●               |     |         |
| ホルモン検査 <sup>*3</sup>  | ●               |                 |                 |                 |     |         |
| HbA1c                 | ●               |                 |                 | ▲ <sup>*4</sup> |     |         |
| D-ダイマー                | ●               |                 | ●               | ●               |     | ●       |
| CA-125                | ●               |                 |                 |                 |     |         |
| 心電図、胸部レントゲン           | ●               |                 |                 |                 |     | ▲       |
| 骨盤・胸部 CT              | ●               |                 |                 |                 |     | ▲       |
| 骨盤 MRI                | ●               |                 |                 |                 |     | ▲       |
| 超音波検査                 | ●               |                 |                 | ●               |     |         |
| 75gOGTT <sup>*5</sup> | ●               |                 |                 |                 |     |         |
| 有害事象の観察               |                 | ←               |                 |                 |     | →       |
| 併用薬の確認                |                 | ←               |                 |                 |     | →       |

●：必須の検査項目 ▲：必要に応じて実施する検査項目

\*1：最初に処方された日の翌日朝から、服用を開始します。

\*2：効果判定（検査結果のご説明）は、検査を行った日の次の来院時に行います。32 週の検査結果は原則として 36 週にお伝えし、第Ⅱ期に移行できるかを判断します。

\*3：スクリーニング、8、16、24、32 週時は、空腹時に採血します。

\*4：スクリーニング時の HbA1c が 6.5 以上の場合、経過測定を行います。

\*5：すでに糖尿病と診断されている場合や、スクリーニングで糖尿病の基準に達する（HbA1c が 6.5 以上かつ空腹時血糖が 120 mg/dL 以上）の場合はこの検査を行いません。

表 4 治験スケジュール（第Ⅱ期：維持治療期）

| 観察時期                     | 第Ⅰ期<br>36 週<br>(寛解判定) | 維持治療期                  |                        |       |                           |                         | 完了時 | 中止時 |
|--------------------------|-----------------------|------------------------|------------------------|-------|---------------------------|-------------------------|-----|-----|
|                          |                       | 120 週まで                |                        | 120 週 | 120 週～治験終了まで              |                         |     |     |
|                          |                       | 12 週、36 週、<br>60 週、・・・ | 24 週、48 週、<br>72 週、・・・ |       | 132 週、156 週、<br>180 週、・・・ | 144、168 週、<br>192 週、・・・ |     |     |
| 許容範囲（日）                  | -21                   | ±28                    | ±28                    | ±28   | ±28                       | ±28                     | -84 |     |
| 治験薬・併用薬・月経コン<br>トロール薬の処方 | ●                     | ●                      | ●                      | ●     | ●                         | ●                       |     |     |
| 不妊治療状況・育児希望<br>の有無       |                       |                        | ●                      | ●     |                           | ●                       | ●   |     |
| 服薬状況確認                   | ●                     | ●                      | ●                      | ●     | ●                         | ●                       | ●   |     |
| 身体所見                     |                       |                        | ●                      | ●     |                           | ●                       | ●   |     |
| 子宮内膜検査*1・効果判定            |                       | ●                      | ●                      | ●     |                           | ●                       | ●   | ●   |
| 血液検査（血算、生化学）             |                       |                        | ●*2                    | ●*2   |                           | ●*2                     | ●*2 | ●   |
| 空腹時血糖、インスリン*2            |                       |                        | ●                      | ●     |                           | ●                       | ●   |     |
| HbA1c*3                  |                       |                        | ▲                      | ▲     |                           | ▲                       | ▲   |     |
| 心電図・胸部レントゲン*4            |                       |                        |                        |       |                           |                         |     | ▲   |
| 骨盤・胸部 CT                 |                       |                        |                        | ●     |                           |                         |     | ▲*4 |
| 骨盤 MRI*4                 |                       |                        |                        |       |                           |                         |     | ▲   |
| 有害事象の観察                  | ←                     |                        |                        |       |                           |                         |     | →   |
| 併用薬の確認                   | ←                     |                        |                        |       |                           |                         |     | →   |
| 転帰の判定*5                  |                       |                        |                        | ●     |                           |                         | ●   | ●   |

●：必須の検査項目 ▲：必要に応じて実施する検査項目

\*1：第Ⅱ期では、外来にて簡易的な検査を行います（吸引組織診、簡易組織診、細胞診など）。外来の検査で再発が疑われる場合は、組織検査を行います。

\*2：中止時以外の来院時は、空腹時に採血します。

\*3：スクリーニング時の HbA1c が 6.5 以上の場合、経過測定を行います。

\*4：再発時や有害事象発生時に、必要に応じて実施します。

\*5：再発の有無を収集します。

＜妊娠が判明した際の対応について＞

妊娠が判明した場合は、可能な限りスケジュールに沿って来院していただき、経過観察を行います。出産された場合などは、担当の治験コーディネーターにご連絡ください。

この治験では、妊娠・出産に関連して下記の情報を収集します。

- ・妊娠を確認した日付
- ・妊娠方法（自然妊娠、不妊治療）
- ・妊娠転帰（生産、流産、死産）および転帰週数
- ・生児獲得日（分娩日）

## 5. この治験の参加予定期間

この治験に同意されてから、患者さんの参加期間は登録された日によって、3 年～5.5年になります。

## 6. 治験に参加する予定人数

この治験には、日本全国から 120 人の患者さんに参加していただく予定です。MPA のみを服用する A 群、MPA に加えてメトホルミン 750mg を服用する B 群、MPA に加えてメトホルミン 1500mg を服用する C 群に、それぞれ 40 人ずつ割り当てられます。

## 7. 治験の利益・不利益

### 【利益】

この治験で行うMPA療法は、現在あなたの病気に対する標準療法のひとつです。今回MPAにメトホルミンというお薬を併用した治療が病気の再発を抑える効果があると期待して試験が計画されました。しかし、現時点であなたの治療のお役に立てるかどうかは証明されていません。この治験の結果から、メトホルミンの子宮体癌あるいは子宮内膜異型増殖症に対する効果が確認できれば、新たな治療法として今後使用される可能性があります。

### 【不利益】

#### ・ 副作用

メトホルミンの内服による副作用としては、吐き気、嘔吐、下痢などが比較的多く見られるほか、以下に示す重篤な副作用もまれに起こります。また、他の糖尿病治療薬とメトホルミンを併用した場合に低血糖が起こる可能性があります（よく効くようになるためと考えられます）。

この試験に参加される患者さんの副作用には細心の注意を払って対応いたしますが、もしいつもと異なる症状が現れた時には速やかに報告してください。症状と程度を適切に判断して、副作用を軽減できるよう最善の処置を行います。

### ① 重大な副作用として報告されているもの

- ・乳酸アシドーシス（頻度不明）：吐き気、嘔吐などの胃腸症状、深く大きい呼吸、意識が薄れるなどが現れることがあります。
- ・低血糖（頻度不明）：脱力感、強い空腹感、冷や汗、動悸、手足のふるえ、意識が薄れるなどが現れることがあります。
- ・肝機能障害、黄疸（頻度不明）：皮膚が黄色くなる、嘔吐、白目が黄色くなる、尿の色が濃くなる、吐き気、食欲不振、かゆみ、からだがだるい症状が現れることがあります。
- ・横紋筋融解症（頻度不明）：脱力感、手のしびれ、手足のこわばり、足のしびれ、筋肉の痛み、尿が赤褐色の症状が現れることがあります。

### ② その他の副作用

- 頻度 5%以上：下痢
- 0.1～5%未満：食欲不振、腹痛、悪心、嘔吐、腹部膨満感、便秘、発疹等、全身倦怠感、頭痛、頭重
- 0.1%未満：消化不良等、眠気
- 頻度不明：胃炎、胃腸障害、放屁増加、貧血、白血球減少、血小板減少、白血球増加、好酸球増加、そう痒、肝機能異常、BUN上昇、クレアチニン上昇、CK上昇、ケトーシス、乳酸上昇、血中カリウム上昇、血中尿酸増加、筋肉痛、めまい・ふらつき、味覚異常、浮腫、動悸、発汗、脱力感、空腹感、ビタミンB12減少

## 8. この治験に参加しない場合の、他の治療法

もしあなたがこの治験に参加されない場合でも、MPA 療法を通常の診療で受けることができます。子宮温存可能な治療法は MPA 療法しかなく、他の選択肢となる治療法としては、子宮を摘出する手術療法があります。担当医師から詳しい説明を受けてください。

## 9. 治験への参加を中止する場合について

あなたがこの治験への参加への取り止めを希望された場合だけでなく、以下に示した項目に該当した場合は、この治験の途中で参加を中止していただく場合がありますのでご了承ください。その場合はすぐに中止の理由を説明いたします。

- ① MPA 療法の効果が見られず、病態の進行が認められた場合
- ② I 期の 32 週目の検査で、病変が消失していなかった場合
- ③ 病変が消失した後に、子宮内膜異型増殖症、子宮内膜癌が再発した場合
- ④ 有害事象により計画書の治療が継続できない場合
- ⑤ 服用できない期間が計画書で定める休薬期間を超えてしまった場合
- ⑥ ステロイドの長期投与により、全身に影響があると医師が判断した場合
- ⑦ 合併症の悪化により病態が急激に悪くなった場合
- ⑧ 患者さん本人または家族から試験中止の申し出があった場合
- ⑨ 試験参加中に守っていただきたいことを守っていただけない場合
- ⑩ その他、試験担当医師が本試験の継続を不可能と判断した場合

中止時には安全性の確認のために検査を行います。また、副作用により試験を中止した場合もその副作用がなくなるまで身体状態を検査することがありますので、ご協力をお願いいたします。

なお、途中で試験を中止した場合でもそれまでの記録は今後の研究に役立つ貴重なデータとして使用させていただきます。

## 10. 新たに重要な情報が得られた場合について

この治験についてお聞きになりたいことがあれば、担当医師に遠慮なくおたずねください。この治験に関する新しい重大な情報（治験の危険性・安全性など）が得られた場合には、速やかにその内容をあなたに伝えます。その場合、このまま治験への参加を続けるかどうか、もう一度あなたの自由な意思で決めていただきます。

### 11. 治験に関連した健康被害の治療について

この治験は、科学的に計画され慎重に行われます。もし、この治験に参加した後何か変わった症状にお気づきの場合は、すぐに担当医師または治験コーディネーターにお知らせください。その時点で最善と思われる処置を行い、適切に対処した上で補償が受けられます。ただし、治験を担当する医師の指示に従わず、その損害があなた自身の過失や故意によるものである場合には、補償が受けられないこともあります。補償について詳しく説明を受けたい場合は、治験を担当する医師あるいは

は治験の相談窓口にお問い合わせ下さい。補償について詳しい内容をご希望の方は資料をお渡しします。

## 1 2. 治験に参加された場合の費用について

### 1) 治験期間中の医療費について

この治験で行う MPA 療法は、通常の診療として承認されている治療法ですので、それに係る薬剤費や、診療費や検査費用などの治療費はあなたご自身が加入されている健康保険に基づいて賄われ、あなたには通常の診療どおり自己負担分をお支払いいただきます。あなたが B 群（メトホルミン 750mg 群）もしくは C 群（メトホルミン 1500mg 群）に割り当てられた場合、メトホルミンのお薬代は研究費により支払われます。

### 2) 治験中の費用の負担軽減について

治験に参加していただけることになった場合、治験のための診察や検査のために、来院する回数が通常の診療より増え、それに伴い交通費などの負担が増えることがあります。この負担を軽くするため、この治験の検査スケジュールで決められた日の来院 1 回につき 7,000 円をお支払いします。治験のための検査、診察を受けるために来院される回数に、7,000 円を乗じた金額を月ごとにまとめて、あなたの口座に振り込みます。また、治験のために入院される場合は、入退院を合わせて 1 回と数え、1 回あたり 7,000 円をお支払いします。お支払いは、病院からあなたの指定する銀行または信用金庫の口座に振り込ませていただきます。

また、かかりつけの病院や他の医療機関で治療を受けた場合に、他院の担当医師へ電話や手紙で連絡をとり、医療情報の提供を求める場合があります。その際に他院からあなたの情報を提供していただくにあたって、情報提供料としてあなたの費用負担が増える場合があります。その際は、あなたに給付される負担軽減費の中からお支払いいただくようお願い致します。

### 13. カルテなどの医療記録の閲覧と秘密の保全について

治験にご協力いただいた個人が特定されるような情報は厳重に保護され、外部に漏れることはありません。患者さんから得られたデータがコード番号などで匿名化され、報告書等でその患者さんのものであると特定されることがないような取扱いをいたします。

この治験の結果は、国（厚生労働省）からメトホルミンを子宮内膜異型増殖症/子宮体癌の治療薬として認めてもらうために、厚生労働省に提出されます。また、この治験薬の効果や安全性についてより詳細に検討するために、治験のデータとして使用された検査・調査等の治験薬の評価に必要なデータを国内外の機関へ提出することがあります。さらに、この治験から得られた情報は、各地の病院から集められた記録をまとめて、学会や医学雑誌等に公表されることもあります。しかし、いずれの場合も、あなたのお名前などが用いられることはなく、あなたの個人情報（氏名、住所、電話番号等）は秘密事項として保護され、外部に漏れることはありません。

また、治験がきちんと行われているかどうかを調べるために、治験薬の開発支援機関の担当者、この病院の治験審査委員会および厚生労働省など規制当局の職員が、カルテなどのあなたの医療に関する記録を閲覧することがあります（他科の診療記録や治験参加以前の期間も含みます）。このような場合でもこれらの関係者には秘密を守る義務が課せられており、患者さんのプライバシーは守られます。

さらに、他の医療機関で治療を受けた場合も、他院の担当医師へ電話や手紙で連絡を取り、医療情報の提供を求める場合があります。あなたがこの説明文書の最後にある同意文書に署名することにより、記録を閲覧することおよび他の医療機関からの情報収集に関しても承諾していただいたことになります。

あなたは、診療情報の利用についていつでも承諾を取り消すことができますが、その後はこの治験に参加いただけなくなりますのでご了承ください。承諾を取り消したい場合は担当医師又は病院の治験コーディネーターにお伝えください。なお、

承諾を取り消すまでに収集された治験データは、上記と同様に利用されますが、承諾を取り消された後は、この治験が正しく行われたかどうかを確認するような場合を除いて、あなたの診療情報が利用されることはありません。

## 1 4. 治験に参加いただくことは自由です

この治験に参加するか否かの決定は、あなた自身の意思に<sup>ゆだ</sup>委ねられます。ご家族の方と相談してから決めて頂くことも出来ます。また、治験に参加している途中で、いつでも自由にやめることができます。もし参加していただかなくても、あなたが今後の治療を受ける上で不利な扱いを受けることは決してありません。

## 1 5. 患者さんに守っていただきたいことについて

この治験への参加に同意していただいた場合は、次の事項をお守りください。

- 1) 治験参加期間中は、治験のスケジュールに従ってください。
- 2) 現在、他の診療科や病院で治療を受けていたり、くすりを飲まれていたりする場合は、担当医師または治験コーディネーターにその状況を詳しくお話下さい。その治療を行っている医師に、あなたがこの治験に参加されていることをお伝えさせていただきます。  
また、市販のくすりを飲む場合も、前もって担当医師または治験コーディネーターにご相談ください。
- 3) 治験中に行われる検査は、あなたの症状の変化や副作用を知るうえで大変重要なものになりますので、担当医師及び治験コーディネーターの指示に従って受けてください。
- 4) 治験薬を使用している間に、体調の変化など何か変わったことがあった場合は、担当医師あるいは治験コーディネーターにお知らせください。
- 5) その他にも、治験を担当する医師からの注意事項や指示にしたがってください。

## 16. 知的財産権と利益相反について

本治験の結果が特許権等の知的財産を生み出す可能性があります、その場合の知的財産権は研究機関に帰属します。

また、本治験の実施に関して、利益相反\*（起こりうる利害の衝突）は存在しないことが利益相反審査委員会で確認されています。

\*利益相反とは：たとえば製薬会社から資金提供その他を受けている場合に自己や製薬会社の利益を図り、患者さんの安全を損なったりデータの解釈をゆがめてしまう行為のことです。

## 17. 治験を審査する委員会

この治験は、以下の治験審査委員会で、科学的および医学的な面だけでなく、患者さんの安全や人権も含めた倫理的面からも審査されています。治験審査委員会は、医療を専門としない委員や、当院と利害関係のない委員も含まれています。

- 1) 名称：千葉大学医学部附属病院 治験審査委員会
- 2) 設置者：千葉大学医学部附属病院 病院長
- 3) 所在地：〒260-8677 千葉県千葉市中央区亥鼻 1-8-1

治験を開始した後も、上記の内容が変更された場合、重篤な副作用の発現といった安全性情報が得られた場合など、この治験を継続して良いかを、当院の病院長からの依頼に応じて審査します。

審査の結果は当院の病院長に報告され、院長はその報告内容を基に当院での治験の開始、継続を決定します。

なお、治験審査委員会の手順書（審査の進め方を示した文書）、議事概要（話し合いの記録）や委員のリストなどの情報について知りたい場合は、治験事務局までお問い合わせください。これらの情報についてはホームページ上でも掲載しております。（URL：<https://www.ho.chiba-u.ac.jp/>）

18. 治験に関する相談窓口

この治験ならびに治療の内容について、わからない言葉や、疑問、質問、もう一度聞きたいことがあるときや、更に詳しい情報を知りたい場合は、遠慮せずにいつでもお尋ねください。治験が始まった後でも、わからないことがあれば、なんでもお答えいたします。また、この治験薬を使うことになにか心配がありましたら、いつでも遠慮なく担当医師または治験コーディネーターにご連絡ください。

以上、この治験の内容について十分ご理解いただいた上で、この治験への参加に同意していただける場合は、この説明文書の最後にある同意文書に同意年月日の記載と署名をお願いいたします。

この説明文書と同意文書（患者さん用）は大切に保管してください。

病院名： 千葉大学医学部附属病院  
治験責任医師：三橋 暁 （職名：医師）  
あなたの担当医師：

相談窓口  
【平日(8:30-17:00)】

- 婦人科外来  
代表：043-222-7171（内線 6891）
- 臨床試験部 治験コーディネーター室  
代表：043-222-7171（内線 6462）  
直通：043-226-2630

【夜間および休日】  
代表：043-222-7171

※婦人科で治験に参加している旨を必ずお伝えください。

【千葉大学医学部附属病院】治験実施計画書番号：Chiba-Met003 1.0 版（2019 年 5 月 24 日）  
説明文書・同意書 1.0 版（2019 年 5 月 24 日）

医師用

## 同意文書

私は、「子宮内膜異型増殖症・子宮体癌に対するメドロキシプロゲステロンとメトホルミンの併用妊孕性温存療法の用量反応性試験」に参加するにあたり、以下の内容について説明を受け、十分に理解した上で、自らの自由意思により本治験に参加することに同意します。

同意日：20 年 月 日

患者さんの名前（署名）：

☆ 治験に関する負担軽減費の支払いを受けることに

☐ 同意します ☐ 同意しません（負担軽減費はいただきません）

（どちらかの□にチェックしてください）

治験責任医師（治験分担医師）

署名： 説明日：20 年 月 日

補足説明者

署名： 説明日：20 年 月 日

病院用

同 意 文 書

私は、「子宮内膜異型増殖症・子宮体癌に対するメドロキシプロゲステロンとメトホルミ  
ンの併用妊孕性温存療法の用量反応性試験」に参加するにあたり、以下の内容について説  
明を受け、十分に理解した上で、自らの自由意思により本治験に参加することに同意しま  
す。

同意日：20 年 月 日

患者さんの名前（署名）：

☆ 治験に関する負担軽減費の支払いを受けることに  
□同意します □同意しません（負担軽減費はいただきません）  
（どちらかの□にチェックしてください）

治験責任医師（治験分担医師）

署名： 説明日：20 年 月 日

補足説明者

署名： 説明日：20 年 月 日

【千葉大学医学部附属病院】治験実施計画書番号：Chiba-Met003 1.0 版（2019 年 5 月 24 日）  
説明文書・同意書 1.0 版（2019 年 5 月 24 日）

患者さん用

## 同 意 文 書

私は、「子宮内膜異型増殖症・子宮体癌に対するメドロキシプロゲステロンとメトホルミ  
ンの併用妊孕性温存療法の用量反応性試験」に参加するにあたり、以下の内容について説  
明を受け、十分に理解した上で、自らの自由意思により本治験に参加することに同意しま  
す。

同意日：20 年 月 日

患者さんの名前（署名）：

☆ 治験に関する負担軽減費の支払いを受けることに

☐ 同意します ☐ 同意しません（負担軽減費はいただきません）

（どちらかの□にチェックしてください）

治験責任医師（治験分担医師）

署名： 説明日：20 年 月 日

補足説明者

署名： 説明日：20 年 月 日

**A list of recruiting sites (from north to south)**

- Hokkaido University Hospital
- Tohoku University Hospital
- University of Tsukuba Hospital
- Jichi Medical University Hospital
- The Jikei University Hospital
- Chiba University Hospital
- Keio University Hospital
- Tokai University Hospital
- Kitasato University Hospital
- Niigata University Medical & Dental Hospital
- Shinshu University Hospital
- Osaka Medical College Hospital
- Gifu University Hospital
- Kurume University Hospital
- Kumamoto University Hospital

**The names of Ethics Committee/s (from north to south)**

Institutional review board, Hokkaido University Hospital

Institutional review board, Tohoku University Hospital

Institutional review board, University of Tsukuba Hospital

Institutional review board, Jichi Medical University Hospital

Institutional review board, The Jikei University Hospital

Institutional review board, Chiba University Hospital

Institutional review board, Keio University Hospital

Institutional review board, Tokai University Hospital

Institutional review board, Kitasato University Hospital

Institutional review board, Niigata University Medical & Dental Hospital

Institutional review board, Shinshu University Hospital

Institutional review board, Osaka Medical College Hospital

Institutional review board, Gifu University Hospital

Institutional review board, Kurume University Hospital

Institutional review board, Kumamoto University Hospital

# Reporting checklist for protocol of a clinical trial.

Based on the SPIRIT guidelines.

## Instructions to authors

Complete this checklist by entering the page numbers from your manuscript where readers will find each of the items listed below.

Your article may not currently address all the items on the checklist. Please modify your text to include the missing information. If you are certain that an item does not apply, please write "n/a" and provide a short explanation.

Upload your completed checklist as an extra file when you submit to a journal.

In your methods section, say that you used the SPIRIT reporting guidelines, and cite them as:

Chan A-W, Tetzlaff JM, Altman DG, Laupacis A, Gøtzsche PC, Krleža-Jerić K, Hróbjartsson A, Mann H, Dickersin K, Berlin J, Doré C, Parulekar W, Summerskill W, Groves T, Schulz K, Sox H, Rockhold FW, Rennie D, Moher D. SPIRIT 2013 Statement: Defining standard protocol items for clinical trials. Ann Intern Med. 2013;158(3):200-207

| Reporting Item                    |                     |                                                                                                              | Page Number      |
|-----------------------------------|---------------------|--------------------------------------------------------------------------------------------------------------|------------------|
| <b>Administrative information</b> |                     |                                                                                                              |                  |
| Title                             | <a href="#">#1</a>  | Descriptive title identifying the study design, population, interventions, and, if applicable, trial acronym | 1                |
| Trial registration                | <a href="#">#2a</a> | Trial identifier and registry name. If not yet registered, name of intended registry                         | 4                |
| Trial registration: data set      | <a href="#">#2b</a> | All items from the World Health Organization Trial Registration Data Set                                     | register to jRCT |
| Protocol version                  | <a href="#">#3</a>  | Date and version identifier                                                                                  | n/a              |
| Funding                           | <a href="#">#4</a>  | Sources and types of financial, material, and other support                                                  | 20               |

|                                                                                        |                                                            |                     |                                                                                                                                                                                                                                                                                          |       |
|----------------------------------------------------------------------------------------|------------------------------------------------------------|---------------------|------------------------------------------------------------------------------------------------------------------------------------------------------------------------------------------------------------------------------------------------------------------------------------------|-------|
| 1<br>2<br>3<br>4<br>5<br>6<br>7<br>8<br>9<br>10<br>11<br>12                            | Roles and responsibilities:<br>contributorship             | <a href="#">#5a</a> | Names, affiliations, and roles of protocol contributors                                                                                                                                                                                                                                  | 1, 20 |
| 13<br>14<br>15<br>16<br>17<br>18<br>19<br>20<br>21<br>22<br>23                         | Roles and responsibilities:<br>sponsor contact information | <a href="#">#5b</a> | Name and contact information for the trial sponsor                                                                                                                                                                                                                                       | 20    |
| 24<br>25<br>26<br>27<br>28<br>29<br>30<br>31<br>32<br>33                               | Roles and responsibilities:<br>sponsor and funder          | <a href="#">#5c</a> | Role of study sponsor and funders, if any, in study design; collection, management, analysis, and interpretation of data; writing of the report; and the decision to submit the report for publication, including whether they will have ultimate authority over any of these activities | 20    |
| 34<br>35<br>36<br>37<br>38<br>39<br>40<br>41<br>42<br>43<br>44<br>45<br>46<br>47<br>48 | Roles and responsibilities:<br>committees                  | <a href="#">#5d</a> | Composition, roles, and responsibilities of the coordinating centre, steering committee, endpoint adjudication committee, data management team, and other individuals or groups overseeing the trial, if applicable (see Item 21a for data monitoring committee)                         | 14    |
| 34                                                                                     | <b>Introduction</b>                                        |                     |                                                                                                                                                                                                                                                                                          |       |
| 36<br>37<br>38<br>39<br>40<br>41<br>42<br>43<br>44<br>45<br>46<br>47<br>48             | Background and rationale                                   | <a href="#">#6a</a> | Description of research question and justification for undertaking the trial, including summary of relevant studies (published and unpublished) examining benefits and harms for each intervention                                                                                       | 4-5   |
| 49<br>50<br>51<br>52<br>53<br>54<br>55<br>56<br>57<br>58<br>59<br>60                   | Background and rationale: choice of comparators            | <a href="#">#6b</a> | Explanation for choice of comparators                                                                                                                                                                                                                                                    | 4-5   |
|                                                                                        | Objectives                                                 | <a href="#">#7</a>  | Specific objectives or hypotheses                                                                                                                                                                                                                                                        | 5     |
|                                                                                        | Trial design                                               | <a href="#">#8</a>  | Description of trial design including type of trial (eg, parallel group, crossover, factorial, single group), allocation ratio, and framework (eg, superiority, equivalence, non-inferiority, exploratory)                                                                               | 4-5   |

|    |                                 |                      |                                                                                                                                                                                                  |                                 |
|----|---------------------------------|----------------------|--------------------------------------------------------------------------------------------------------------------------------------------------------------------------------------------------|---------------------------------|
| 1  | <b>Methods:</b>                 |                      |                                                                                                                                                                                                  |                                 |
| 2  | <b>Participants,</b>            |                      |                                                                                                                                                                                                  |                                 |
| 3  | <b>interventions, and</b>       |                      |                                                                                                                                                                                                  |                                 |
| 4  | <b>outcomes</b>                 |                      |                                                                                                                                                                                                  |                                 |
| 5  |                                 |                      |                                                                                                                                                                                                  |                                 |
| 6  |                                 |                      |                                                                                                                                                                                                  |                                 |
| 7  |                                 |                      |                                                                                                                                                                                                  |                                 |
| 8  | Study setting                   | <a href="#">#9</a>   | Description of study settings (eg, community clinic, academic hospital) and list of countries where data will be collected. Reference to where list of study sites can be obtained               | 6                               |
| 9  |                                 |                      |                                                                                                                                                                                                  |                                 |
| 10 |                                 |                      |                                                                                                                                                                                                  |                                 |
| 11 |                                 |                      |                                                                                                                                                                                                  |                                 |
| 12 |                                 |                      |                                                                                                                                                                                                  |                                 |
| 13 |                                 |                      |                                                                                                                                                                                                  |                                 |
| 14 |                                 |                      |                                                                                                                                                                                                  |                                 |
| 15 | Eligibility criteria            | <a href="#">#10</a>  | Inclusion and exclusion criteria for participants. If applicable, eligibility criteria for study centres and individuals who will perform the interventions (eg, surgeons, psychotherapists)     | 7-10                            |
| 16 |                                 |                      |                                                                                                                                                                                                  |                                 |
| 17 |                                 |                      |                                                                                                                                                                                                  |                                 |
| 18 |                                 |                      |                                                                                                                                                                                                  |                                 |
| 19 |                                 |                      |                                                                                                                                                                                                  |                                 |
| 20 |                                 |                      |                                                                                                                                                                                                  |                                 |
| 21 |                                 |                      |                                                                                                                                                                                                  |                                 |
| 22 | Interventions: description      | <a href="#">#11a</a> | Interventions for each group with sufficient detail to allow replication, including how and when they will be administered                                                                       | 11-12                           |
| 23 |                                 |                      |                                                                                                                                                                                                  |                                 |
| 24 |                                 |                      |                                                                                                                                                                                                  |                                 |
| 25 |                                 |                      |                                                                                                                                                                                                  |                                 |
| 26 |                                 |                      |                                                                                                                                                                                                  |                                 |
| 27 |                                 |                      |                                                                                                                                                                                                  |                                 |
| 28 | Interventions: modifications    | <a href="#">#11b</a> | Criteria for discontinuing or modifying allocated interventions for a given trial participant (eg, drug dose change in response to harms, participant request, or improving / worsening disease) | 12-13                           |
| 29 |                                 |                      |                                                                                                                                                                                                  |                                 |
| 30 |                                 |                      |                                                                                                                                                                                                  |                                 |
| 31 |                                 |                      |                                                                                                                                                                                                  |                                 |
| 32 |                                 |                      |                                                                                                                                                                                                  |                                 |
| 33 |                                 |                      |                                                                                                                                                                                                  |                                 |
| 34 |                                 |                      |                                                                                                                                                                                                  |                                 |
| 35 | Interventions: adherence        | <a href="#">#11c</a> | Strategies to improve adherence to intervention protocols, and any procedures for monitoring adherence (eg, drug tablet return; laboratory tests)                                                | n/a                             |
| 36 |                                 |                      |                                                                                                                                                                                                  |                                 |
| 37 |                                 |                      |                                                                                                                                                                                                  | describe in original protocol.  |
| 38 |                                 |                      |                                                                                                                                                                                                  |                                 |
| 39 |                                 |                      |                                                                                                                                                                                                  |                                 |
| 40 |                                 |                      |                                                                                                                                                                                                  |                                 |
| 41 |                                 |                      |                                                                                                                                                                                                  |                                 |
| 42 |                                 |                      |                                                                                                                                                                                                  |                                 |
| 43 |                                 |                      |                                                                                                                                                                                                  | Available on supplementary file |
| 44 |                                 |                      |                                                                                                                                                                                                  |                                 |
| 45 |                                 |                      |                                                                                                                                                                                                  |                                 |
| 46 |                                 |                      |                                                                                                                                                                                                  |                                 |
| 47 |                                 |                      |                                                                                                                                                                                                  |                                 |
| 48 | Interventions: concomitant care | <a href="#">#11d</a> | Relevant concomitant care and interventions that are permitted or prohibited during the trial                                                                                                    | n/a                             |
| 49 |                                 |                      |                                                                                                                                                                                                  |                                 |
| 50 |                                 |                      |                                                                                                                                                                                                  |                                 |
| 51 |                                 |                      |                                                                                                                                                                                                  | describe in original protocol.  |
| 52 |                                 |                      |                                                                                                                                                                                                  |                                 |
| 53 |                                 |                      |                                                                                                                                                                                                  |                                 |
| 54 |                                 |                      |                                                                                                                                                                                                  |                                 |
| 55 |                                 |                      |                                                                                                                                                                                                  |                                 |
| 56 |                                 |                      |                                                                                                                                                                                                  | Available on supplementary file |
| 57 |                                 |                      |                                                                                                                                                                                                  |                                 |
| 58 |                                 |                      |                                                                                                                                                                                                  |                                 |
| 59 |                                 |                      |                                                                                                                                                                                                  |                                 |
| 60 |                                 |                      |                                                                                                                                                                                                  |                                 |

|    |                                 |                      |                                                                                                                                                                                                                                                                                                                                                                                |       |
|----|---------------------------------|----------------------|--------------------------------------------------------------------------------------------------------------------------------------------------------------------------------------------------------------------------------------------------------------------------------------------------------------------------------------------------------------------------------|-------|
| 1  | Outcomes                        | <a href="#">#12</a>  | Primary, secondary, and other outcomes, including the specific measurement variable (eg, systolic blood pressure), analysis metric (eg, change from baseline, final value, time to event), method of aggregation (eg, median, proportion), and time point for each outcome. Explanation of the clinical relevance of chosen efficacy and harm outcomes is strongly recommended | 14-16 |
| 2  |                                 |                      |                                                                                                                                                                                                                                                                                                                                                                                |       |
| 3  |                                 |                      |                                                                                                                                                                                                                                                                                                                                                                                |       |
| 4  |                                 |                      |                                                                                                                                                                                                                                                                                                                                                                                |       |
| 5  |                                 |                      |                                                                                                                                                                                                                                                                                                                                                                                |       |
| 6  |                                 |                      |                                                                                                                                                                                                                                                                                                                                                                                |       |
| 7  |                                 |                      |                                                                                                                                                                                                                                                                                                                                                                                |       |
| 8  |                                 |                      |                                                                                                                                                                                                                                                                                                                                                                                |       |
| 9  |                                 |                      |                                                                                                                                                                                                                                                                                                                                                                                |       |
| 10 |                                 |                      |                                                                                                                                                                                                                                                                                                                                                                                |       |
| 11 |                                 |                      |                                                                                                                                                                                                                                                                                                                                                                                |       |
| 12 |                                 |                      |                                                                                                                                                                                                                                                                                                                                                                                |       |
| 13 |                                 |                      |                                                                                                                                                                                                                                                                                                                                                                                |       |
| 14 | Participant timeline            | <a href="#">#13</a>  | Time schedule of enrolment, interventions (including any run-ins and washouts), assessments, and visits for participants. A schematic diagram is highly recommended (see Figure)                                                                                                                                                                                               | 11-12 |
| 15 |                                 |                      |                                                                                                                                                                                                                                                                                                                                                                                |       |
| 16 |                                 |                      |                                                                                                                                                                                                                                                                                                                                                                                |       |
| 17 |                                 |                      |                                                                                                                                                                                                                                                                                                                                                                                |       |
| 18 |                                 |                      |                                                                                                                                                                                                                                                                                                                                                                                |       |
| 19 |                                 |                      |                                                                                                                                                                                                                                                                                                                                                                                |       |
| 20 |                                 |                      |                                                                                                                                                                                                                                                                                                                                                                                |       |
| 21 |                                 |                      |                                                                                                                                                                                                                                                                                                                                                                                |       |
| 22 |                                 |                      |                                                                                                                                                                                                                                                                                                                                                                                |       |
| 23 | Sample size                     | <a href="#">#14</a>  | Estimated number of participants needed to achieve study objectives and how it was determined, including clinical and statistical assumptions supporting any sample size calculations                                                                                                                                                                                          | 16    |
| 24 |                                 |                      |                                                                                                                                                                                                                                                                                                                                                                                |       |
| 25 |                                 |                      |                                                                                                                                                                                                                                                                                                                                                                                |       |
| 26 |                                 |                      |                                                                                                                                                                                                                                                                                                                                                                                |       |
| 27 |                                 |                      |                                                                                                                                                                                                                                                                                                                                                                                |       |
| 28 |                                 |                      |                                                                                                                                                                                                                                                                                                                                                                                |       |
| 29 |                                 |                      |                                                                                                                                                                                                                                                                                                                                                                                |       |
| 30 |                                 |                      |                                                                                                                                                                                                                                                                                                                                                                                |       |
| 31 | Recruitment                     | <a href="#">#15</a>  | Strategies for achieving adequate participant enrolment to reach target sample size                                                                                                                                                                                                                                                                                            | 16    |
| 32 |                                 |                      |                                                                                                                                                                                                                                                                                                                                                                                |       |
| 33 |                                 |                      |                                                                                                                                                                                                                                                                                                                                                                                |       |
| 34 |                                 |                      |                                                                                                                                                                                                                                                                                                                                                                                |       |
| 35 | <b>Methods:</b>                 |                      |                                                                                                                                                                                                                                                                                                                                                                                |       |
| 36 | <b>Assignment of</b>            |                      |                                                                                                                                                                                                                                                                                                                                                                                |       |
| 37 | <b>interventions (for</b>       |                      |                                                                                                                                                                                                                                                                                                                                                                                |       |
| 38 | <b>controlled trials)</b>       |                      |                                                                                                                                                                                                                                                                                                                                                                                |       |
| 39 |                                 |                      |                                                                                                                                                                                                                                                                                                                                                                                |       |
| 40 |                                 |                      |                                                                                                                                                                                                                                                                                                                                                                                |       |
| 41 |                                 |                      |                                                                                                                                                                                                                                                                                                                                                                                |       |
| 42 | Allocation: sequence generation | <a href="#">#16a</a> | Method of generating the allocation sequence (eg, computer-generated random numbers), and list of any factors for stratification. To reduce predictability of a random sequence, details of any planned restriction (eg, blocking) should be provided in a separate document that is unavailable to those who enrol participants or assign interventions                       | 10    |
| 43 |                                 |                      |                                                                                                                                                                                                                                                                                                                                                                                |       |
| 44 |                                 |                      |                                                                                                                                                                                                                                                                                                                                                                                |       |
| 45 |                                 |                      |                                                                                                                                                                                                                                                                                                                                                                                |       |
| 46 |                                 |                      |                                                                                                                                                                                                                                                                                                                                                                                |       |
| 47 |                                 |                      |                                                                                                                                                                                                                                                                                                                                                                                |       |
| 48 |                                 |                      |                                                                                                                                                                                                                                                                                                                                                                                |       |
| 49 |                                 |                      |                                                                                                                                                                                                                                                                                                                                                                                |       |
| 50 |                                 |                      |                                                                                                                                                                                                                                                                                                                                                                                |       |
| 51 |                                 |                      |                                                                                                                                                                                                                                                                                                                                                                                |       |
| 52 |                                 |                      |                                                                                                                                                                                                                                                                                                                                                                                |       |
| 53 |                                 |                      |                                                                                                                                                                                                                                                                                                                                                                                |       |
| 54 |                                 |                      |                                                                                                                                                                                                                                                                                                                                                                                |       |
| 55 |                                 |                      |                                                                                                                                                                                                                                                                                                                                                                                |       |
| 56 |                                 |                      |                                                                                                                                                                                                                                                                                                                                                                                |       |
| 57 |                                 |                      |                                                                                                                                                                                                                                                                                                                                                                                |       |
| 58 |                                 |                      |                                                                                                                                                                                                                                                                                                                                                                                |       |
| 59 |                                 |                      |                                                                                                                                                                                                                                                                                                                                                                                |       |
| 60 |                                 |                      |                                                                                                                                                                                                                                                                                                                                                                                |       |

|    |                        |                      |                                                        |               |
|----|------------------------|----------------------|--------------------------------------------------------|---------------|
| 1  | Allocation             | <a href="#">#16b</a> | Mechanism of implementing the allocation               | 10            |
| 2  | concealment            |                      | sequence (eg, central telephone; sequentially          |               |
| 3  | mechanism              |                      | numbered, opaque, sealed envelopes), describing        |               |
| 4  |                        |                      | any steps to conceal the sequence until                |               |
| 5  |                        |                      | interventions are assigned                             |               |
| 6  |                        |                      |                                                        |               |
| 7  |                        |                      |                                                        |               |
| 8  |                        |                      |                                                        |               |
| 9  | Allocation:            | <a href="#">#16c</a> | Who will generate the allocation sequence, who         | n/a           |
| 10 | implementation         |                      | will enrol participants, and who will assign           |               |
| 11 |                        |                      | participants to interventions                          | describe in   |
| 12 |                        |                      |                                                        | original      |
| 13 |                        |                      |                                                        | protocol.     |
| 14 |                        |                      |                                                        |               |
| 15 |                        |                      |                                                        | Available on  |
| 16 |                        |                      |                                                        | supplementary |
| 17 |                        |                      |                                                        | file          |
| 18 |                        |                      |                                                        |               |
| 19 | Blinding (masking)     | <a href="#">#17a</a> | Who will be blinded after assignment to                | n/a           |
| 20 |                        |                      | interventions (eg, trial participants, care providers, |               |
| 21 |                        |                      | outcome assessors, data analysts), and how             | describe in   |
| 22 |                        |                      |                                                        | original      |
| 23 |                        |                      |                                                        | protocol.     |
| 24 |                        |                      |                                                        |               |
| 25 |                        |                      |                                                        | Available on  |
| 26 |                        |                      |                                                        | supplementary |
| 27 |                        |                      |                                                        | file.         |
| 28 |                        |                      |                                                        |               |
| 29 | Blinding (masking):    | <a href="#">#17b</a> | If blinded, circumstances under which unblinding is    | 10            |
| 30 | emergency              |                      | permissible, and procedure for revealing a             |               |
| 31 | unblinding             |                      | participant's allocated intervention during the trial  |               |
| 32 |                        |                      |                                                        |               |
| 33 |                        |                      |                                                        |               |
| 34 |                        |                      |                                                        |               |
| 35 | <b>Methods: Data</b>   |                      |                                                        |               |
| 36 | <b>collection,</b>     |                      |                                                        |               |
| 37 | <b>management, and</b> |                      |                                                        |               |
| 38 | <b>analysis</b>        |                      |                                                        |               |
| 39 |                        |                      |                                                        |               |
| 40 |                        |                      |                                                        |               |
| 41 | Data collection plan   | <a href="#">#18a</a> | Plans for assessment and collection of outcome,        | 14-16         |
| 42 |                        |                      | baseline, and other trial data, including any related  |               |
| 43 |                        |                      | processes to promote data quality (eg, duplicate       |               |
| 44 |                        |                      | measurements, training of assessors) and a             |               |
| 45 |                        |                      | description of study instruments (eg,                  |               |
| 46 |                        |                      | questionnaires, laboratory tests) along with their     |               |
| 47 |                        |                      | reliability and validity, if known. Reference to where |               |
| 48 |                        |                      |                                                        |               |
| 49 |                        |                      |                                                        |               |
| 50 |                        |                      |                                                        |               |
| 51 |                        |                      |                                                        |               |
| 52 |                        |                      |                                                        |               |
| 53 |                        |                      |                                                        |               |
| 54 |                        |                      |                                                        |               |
| 55 |                        |                      |                                                        |               |
| 56 |                        |                      |                                                        |               |
| 57 |                        |                      |                                                        |               |
| 58 |                        |                      |                                                        |               |
| 59 |                        |                      |                                                        |               |
| 60 |                        |                      |                                                        |               |

data collection forms can be found, if not in the protocol

|                                                  |                      |                                                                                                                                                                                                                                                                                                                                       |                                                                                 |
|--------------------------------------------------|----------------------|---------------------------------------------------------------------------------------------------------------------------------------------------------------------------------------------------------------------------------------------------------------------------------------------------------------------------------------|---------------------------------------------------------------------------------|
| Data collection plan: retention                  | <a href="#">#18b</a> | Plans to promote participant retention and complete follow-up, including list of any outcome data to be collected for participants who discontinue or deviate from intervention protocols                                                                                                                                             | n/a<br><br>describe in original protocol<br><br>Available on supplementary file |
| Data management                                  | <a href="#">#19</a>  | Plans for data entry, coding, security, and storage, including any related processes to promote data quality (eg, double data entry; range checks for data values). Reference to where details of data management procedures can be found, if not in the protocol                                                                     | 10, 13                                                                          |
| Statistics: outcomes                             | <a href="#">#20a</a> | Statistical methods for analysing primary and secondary outcomes. Reference to where other details of the statistical analysis plan can be found, if not in the protocol                                                                                                                                                              | 14-16                                                                           |
| Statistics: additional analyses                  | <a href="#">#20b</a> | Methods for any additional analyses (eg, subgroup and adjusted analyses)                                                                                                                                                                                                                                                              | n/a                                                                             |
| Statistics: analysis population and missing data | <a href="#">#20c</a> | Definition of analysis population relating to protocol non-adherence (eg, as randomised analysis), and any statistical methods to handle missing data (eg, multiple imputation)                                                                                                                                                       | 14-16                                                                           |
| <b>Methods:</b>                                  |                      |                                                                                                                                                                                                                                                                                                                                       |                                                                                 |
| <b>Monitoring</b>                                |                      |                                                                                                                                                                                                                                                                                                                                       |                                                                                 |
| Data monitoring: formal committee                | <a href="#">#21a</a> | Composition of data monitoring committee (DMC); summary of its role and reporting structure; statement of whether it is independent from the sponsor and competing interests; and reference to where further details about its charter can be found, if not in the protocol. Alternatively, an explanation of why a DMC is not needed | 14                                                                              |

|    |                      |                      |                                                        |         |
|----|----------------------|----------------------|--------------------------------------------------------|---------|
| 1  | Data monitoring:     | <a href="#">#21b</a> | Description of any interim analyses and stopping       | 16-17   |
| 2  | interim analysis     |                      | guidelines, including who will have access to these    |         |
| 3  |                      |                      | interim results and make the final decision to         |         |
| 4  |                      |                      | terminate the trial                                    |         |
| 5  |                      |                      |                                                        |         |
| 6  |                      |                      |                                                        |         |
| 7  |                      |                      |                                                        |         |
| 8  | Harms                | <a href="#">#22</a>  | Plans for collecting, assessing, reporting, and        | 13, 16  |
| 9  |                      |                      | managing solicited and spontaneously reported          |         |
| 10 |                      |                      | adverse events and other unintended effects of trial   |         |
| 11 |                      |                      | interventions or trial conduct                         |         |
| 12 |                      |                      |                                                        |         |
| 13 |                      |                      |                                                        |         |
| 14 |                      |                      |                                                        |         |
| 15 | Auditing             | <a href="#">#23</a>  | Frequency and procedures for auditing trial            | 13, 14, |
| 16 |                      |                      | conduct, if any, and whether the process will be       |         |
| 17 |                      |                      | independent from investigators and the sponsor         |         |
| 18 |                      |                      |                                                        |         |
| 19 |                      |                      |                                                        |         |
| 20 |                      |                      |                                                        |         |
| 21 | <b>Ethics and</b>    |                      |                                                        |         |
| 22 | <b>dissemination</b> |                      |                                                        |         |
| 23 |                      |                      |                                                        |         |
| 24 | Research ethics      | <a href="#">#24</a>  | Plans for seeking research ethics committee /          | 17, 20  |
| 25 | approval             |                      | institutional review board (REC / IRB) approval        |         |
| 26 |                      |                      |                                                        |         |
| 27 |                      |                      |                                                        |         |
| 28 | Protocol             | <a href="#">#25</a>  | Plans for communicating important protocol             | 17      |
| 29 | amendments           |                      | modifications (eg, changes to eligibility criteria,    |         |
| 30 |                      |                      | outcomes, analyses) to relevant parties (eg,           |         |
| 31 |                      |                      | investigators, REC / IRBs, trial participants, trial   |         |
| 32 |                      |                      | registries, journals, regulators)                      |         |
| 33 |                      |                      |                                                        |         |
| 34 |                      |                      |                                                        |         |
| 35 |                      |                      |                                                        |         |
| 36 |                      |                      |                                                        |         |
| 37 | Consent or assent    | <a href="#">#26a</a> | Who will obtain informed consent or assent from        | 17      |
| 38 |                      |                      | potential trial participants or authorised surrogates, |         |
| 39 |                      |                      | and how (see Item 32)                                  |         |
| 40 |                      |                      |                                                        |         |
| 41 |                      |                      |                                                        |         |
| 42 |                      |                      |                                                        |         |
| 43 | Consent or assent:   | <a href="#">#26b</a> | Additional consent provisions for collection and use   | 17      |
| 44 | ancillary studies    |                      | of participant data and biological specimens in        |         |
| 45 |                      |                      | ancillary studies, if applicable                       |         |
| 46 |                      |                      |                                                        |         |
| 47 |                      |                      |                                                        |         |
| 48 | Confidentiality      | <a href="#">#27</a>  | How personal information about potential and           | 17      |
| 49 |                      |                      | enrolled participants will be collected, shared, and   |         |
| 50 |                      |                      | maintained in order to protect confidentiality before, |         |
| 51 |                      |                      | during, and after the trial                            |         |
| 52 |                      |                      |                                                        |         |
| 53 |                      |                      |                                                        |         |
| 54 |                      |                      |                                                        |         |
| 55 | Declaration of       | <a href="#">#28</a>  | Financial and other competing interests for            | 17      |
| 56 | interests            |                      | principal investigators for the overall trial and each |         |
| 57 |                      |                      | study site                                             |         |
| 58 |                      |                      |                                                        |         |
| 59 |                      |                      |                                                        |         |
| 60 |                      |                      |                                                        |         |

|                                             |                      |                                                                                                                                                                                                                                                                                     |                                 |
|---------------------------------------------|----------------------|-------------------------------------------------------------------------------------------------------------------------------------------------------------------------------------------------------------------------------------------------------------------------------------|---------------------------------|
| Data access                                 | <a href="#">#29</a>  | Statement of who will have access to the final trial dataset, and disclosure of contractual agreements that limit such access for investigators                                                                                                                                     | n/a                             |
| Ancillary and post trial care               | <a href="#">#30</a>  | Provisions, if any, for ancillary and post-trial care, and for compensation to those who suffer harm from trial participation                                                                                                                                                       | n/a                             |
| Dissemination policy: trial results         | <a href="#">#31a</a> | Plans for investigators and sponsor to communicate trial results to participants, healthcare professionals, the public, and other relevant groups (eg, via publication, reporting in results databases, or other data sharing arrangements), including any publication restrictions | 17                              |
| Dissemination policy: authorship            | <a href="#">#31b</a> | Authorship eligibility guidelines and any intended use of professional writers                                                                                                                                                                                                      | n/a                             |
| Dissemination policy: reproducible research | <a href="#">#31c</a> | Plans, if any, for granting public access to the full protocol, participant-level dataset, and statistical code                                                                                                                                                                     | 17                              |
| <b>Appendices</b>                           |                      |                                                                                                                                                                                                                                                                                     |                                 |
| Informed consent materials                  | <a href="#">#32</a>  | Model consent form and other related documentation given to participants and authorised surrogates                                                                                                                                                                                  | Available on supplementary file |
| Biological specimens                        | <a href="#">#33</a>  | Plans for collection, laboratory evaluation, and storage of biological specimens for genetic or molecular analysis in the current trial and for future use in ancillary studies, if applicable                                                                                      | n/a                             |

None The SPIRIT checklist is distributed under the terms of the Creative Commons Attribution License CC-BY-ND 3.0. This checklist can be completed online using <https://www.goodreports.org/>, a tool made by the [EQUATOR Network](#) in collaboration with [Penelope.ai](#)

# BMJ Open

## **Medroxyprogesterone acetate plus metformin for fertility-sparing treatment of atypical endometrial hyperplasia and endometrial carcinoma: trial protocol for a prospective, randomized, open, blinded-endpoint design, dose response trial (FELICIA Trial)**

|                                 |                                                                                                                                                                                                                                                                                                                                                                                                                                                                                                                                        |
|---------------------------------|----------------------------------------------------------------------------------------------------------------------------------------------------------------------------------------------------------------------------------------------------------------------------------------------------------------------------------------------------------------------------------------------------------------------------------------------------------------------------------------------------------------------------------------|
| Journal:                        | <i>BMJ Open</i>                                                                                                                                                                                                                                                                                                                                                                                                                                                                                                                        |
| Manuscript ID                   | bmjopen-2019-035416.R2                                                                                                                                                                                                                                                                                                                                                                                                                                                                                                                 |
| Article Type:                   | Protocol                                                                                                                                                                                                                                                                                                                                                                                                                                                                                                                               |
| Date Submitted by the Author:   | 18-Jan-2020                                                                                                                                                                                                                                                                                                                                                                                                                                                                                                                            |
| Complete List of Authors:       | Mitsuhashi, Akira; Chiba University Graduate School of Medicine School of Medicine, Reproductive Medicine<br>Kawasaki, Yohei; Chiba University Hospital, Biostatistics Section, Clinical Research Center<br>Hori, Makoto; Chiba University Hospital, Clinical Research Center<br>Fujiwara, Tadami; Chiba University Hospital, Clinical Research Center<br>Hanaoka, Hideki; Chiba University Hospital, Clinical Research Center<br>Shozu, Makio; Chiba University Graduate School of Medicine School of Medicine, Reproductive Medicine |
| <b>Primary Subject Heading</b>: | Oncology                                                                                                                                                                                                                                                                                                                                                                                                                                                                                                                               |
| Secondary Subject Heading:      | Obstetrics and gynaecology                                                                                                                                                                                                                                                                                                                                                                                                                                                                                                             |
| Keywords:                       | Gynaecological oncology < GYNAECOLOGY, Adult oncology < ONCOLOGY, Gynaecological oncology < ONCOLOGY                                                                                                                                                                                                                                                                                                                                                                                                                                   |
|                                 |                                                                                                                                                                                                                                                                                                                                                                                                                                                                                                                                        |

SCHOLARONE™  
Manuscripts



I, the Submitting Author has the right to grant and does grant on behalf of all authors of the Work (as defined in the below author licence), an exclusive licence and/or a non-exclusive licence for contributions from authors who are: i) UK Crown employees; ii) where BMJ has agreed a CC-BY licence shall apply, and/or iii) in accordance with the terms applicable for US Federal Government officers or employees acting as part of their official duties; on a worldwide, perpetual, irrevocable, royalty-free basis to BMJ Publishing Group Ltd ("BMJ") its licensees and where the relevant Journal is co-owned by BMJ to the co-owners of the Journal, to publish the Work in this journal and any other BMJ products and to exploit all rights, as set out in our [licence](#).

The Submitting Author accepts and understands that any supply made under these terms is made by BMJ to the Submitting Author unless you are acting as an employee on behalf of your employer or a postgraduate student of an affiliated institution which is paying any applicable article publishing charge ("APC") for Open Access articles. Where the Submitting Author wishes to make the Work available on an Open Access basis (and intends to pay the relevant APC), the terms of reuse of such Open Access shall be governed by a Creative Commons licence – details of these licences and which [Creative Commons](#) licence will apply to this Work are set out in our licence referred to above.

Other than as permitted in any relevant BMJ Author's Self Archiving Policies, I confirm this Work has not been accepted for publication elsewhere, is not being considered for publication elsewhere and does not duplicate material already published. I confirm all authors consent to publication of this Work and authorise the granting of this licence.

## Protocol

# **Medroxyprogesterone acetate plus metformin for fertility-sparing treatment of atypical endometrial hyperplasia and endometrial carcinoma: trial protocol for a prospective, randomized, open, blinded-endpoint design, dose response trial (FELICIA Trial)**

Running head: Dose response trial for metformin + MPA

Authors: Akira Mitsuhashi<sup>1)</sup>, Yohei Kawasaki<sup>2)</sup>, Makoto Hori<sup>3)</sup>, Tadami Fujiwara<sup>3)</sup>, Hideki Hanaoka<sup>3)</sup>, Makio Shozu<sup>1)</sup>.

Institutional affiliations:

1) Department of Reproductive Medicine, Graduate School of Medicine, Chiba University,

1-8-1 Inohana, Chuo-ku, Chiba 260-8670, Japan

2) Biostatistics Section, Clinical Research Center, Chiba University Hospital, 1-8-1 Inohana,

Chuo-ku, Chiba 260-8677, Japan

3) Clinical Research Center, Chiba University Hospital, 1-8-1 Inohana, Chuo-ku, Chiba

260-8677, Japan

1  
2  
3  
4  
5  
6  
7  
8  
9  
10  
11  
12  
13  
14  
15  
16  
17  
18  
19  
20  
21  
22  
23  
24  
25  
26  
27  
28  
29  
30  
31  
32  
33  
34  
35  
36  
37  
38  
39  
40  
41  
42  
43  
44  
45  
46  
47  
48  
49  
50  
51  
52  
53  
54  
55  
56  
57  
58  
59  
60

Corresponding author: Akira Mitsuhashi. Department of Reproductive Medicine, Graduate School of Medicine, Chiba University, 1-8-1 Inohana Chuo-ku, Chiba 260-8670, Japan  
Tel: +81-43-226-2121; Fax: +81-43-226-2122; E-mail: antira@faculty.chiba-u.jp

**Word count 3628**

**Abstract**

**Introduction:** Progestin therapy is the only fertility sparing treatment option for patients with atypical endometrial hyperplasia (AEH) and endometrial cancer (EC). However, the results of three meta-analyses revealed a high remission rate, as well as an association with a high rate of relapse. We previously conducted a phase II of medroxyprogesterone acetate (MPA) plus metformin as a fertility-sparing treatment for AEH and EC patients, and reported that metformin inhibited disease relapse after remission.

**Methods and analysis:** A randomized open blinded-endpoint design phase IIb dose response trial was planned to commence in July 2019. The trial aims to identify the appropriate dose of metformin to be combined with medroxyprogesterone acetate therapy for fertility-sparing treatment of patients with AEH and EC. The primary endpoint of the trial is the three-year relapse-free survival (RFS) rate. The secondary endpoints are RFS rate, the overall rate of response to medroxyprogesterone acetate therapy, the conception rate after treatment, the outcome of pregnancy, toxicity evaluation, and changes in insulin resistance and body mass

index. A total of 120 patients will be enrolled from 15 Japanese institutions within a 2.5-year period and followed up for at least 3 years.

**Ethics and dissemination:** The protocol was approved by the institutional Review Board at Chiba University Hospital and boards at 14 other institutions. The trial will be conducted according to the principles of the World Medical Association Declaration of Helsinki and in accordance with GCP standards. The trial findings will be published in a peer-reviewed journal.

**Trial registration number:** jRCT2031190065

### **Strengths and limitations of this trial**

- 1) This is the first randomized controlled trial that aims to identify the appropriate metformin dose to be added to medroxyprogesterone acetate therapy for fertility-sparing treatment of patients with AEH and EC.
- 2) The trial has been designed to meet high-quality randomized clinical trial criteria by performing central randomization and ensuring multicenter participation.
- 3) Since the association between the trial primary endpoint, 3-year relapse-free survival rate, and medroxyprogesterone acetate plus metformin treatment will be examined, this study can

1  
2  
3  
4  
5  
6  
7  
8  
9  
10  
11  
12  
13  
14  
15  
16  
17  
18  
19  
20  
21  
22  
23  
24  
25  
26  
27  
28  
29  
30  
31  
32  
33  
34  
35  
36  
37  
38  
39  
40  
41  
42  
43  
44  
45  
46  
47  
48  
49  
50  
51  
52  
53  
54  
55  
56  
57  
58  
59  
60

evaluate the efficacy of the addition of metformin to medroxyprogesterone in fertility-sparing treatment of AEH and EC patients.

- 4) To reduce the bias associated with the open-label design, and to maintain objectivity, we used blinded investigators to evaluate the endpoint, and judgment was based on standardized criteria for central pathological diagnosis.
- 5) A limitation of this trial is that it is not confirmatory in the evaluation of the primary endpoint.

**Keywords:** metformin, medroxyprogesterone acetate, fertility sparing treatment, atypical endometrial hyperplasia, endometrial cancer

## INTRODUCTION

Progestin therapy is the only fertility sparing treatment option for patients with atypical endometrial hyperplasia (AEH) and endometrial cancer (EC). The guidelines of the National Comprehensive Cancer Network and the European Society of Gynecological Oncology Task Force regarding fertility-sparing treatment recommend progestin therapy for patients with AEH and EC who wish to conceive.[1, 2] However, the results of three meta-analyses revealed a high remission rate, as well as an association with a high rate of relapse.[3-5]

EC is often associated with obesity and/or diabetes mellitus, indicating that insulin resistance is a risk factor for EC.[6-8] We previously reported the incidence of obesity, insulin resistance, and abnormal glucose metabolism among young EC patients as 84%, 83%, and 78%, respectively.[9] Hyperinsulinemia due to insulin resistance plays an important role in carcinogenesis.[10] Epidemiological and basic research studies support this notion; thus, insulin resistance may be a promising target for the treatment and prevention of EC.[10, 11] Metformin is a biguanide that is widely used for the treatment of type 2 diabetes mellitus. Several recent epidemiological studies have revealed that metformin reduces the incidence of cancer and cancer-related mortality in diabetes patients.[12, 13]

Moreover, metformin inhibited the growth of breast, ovarian, endometrial, and prostate cancer cells, probably through the suppression of MAPK, cyclin D1, and mammalian

1  
2  
3  
4  
5  
6  
7  
8  
9  
10  
11  
12  
13  
14  
15  
16  
17  
18  
19  
20  
21  
22  
23  
24  
25  
26  
27  
28  
29  
30  
31  
32  
33  
34  
35  
36  
37  
38  
39  
40  
41  
42  
43  
44  
45  
46  
47  
48  
49  
50  
51  
52  
53  
54  
55  
56  
57  
58  
59  
60

target of rapamycin activity.[14, 15] Furthermore, metformin enhanced ovulation in patients with polycystic ovary syndrome and improved pregnancy rates.[16, 17]

Based on this information, we previously conducted a phase II study of medroxyprogesterone acetate (MPA) plus metformin as a fertility-sparing treatment for AEH and EC patients and reported that metformin had inhibited disease relapse after remission. Additionally, metformin prevented weight gain caused by MPA and had improved insulin sensitivity among the registered patients.[18]

Therefore, we conducted a dose response randomized phase II study of MPA plus metformin for fertility-sparing treatment of AEH and EC. The trial protocol was approved by the Pharmaceuticals and Medical Devices Agency, Japan in June 2019 and the trial was initiated in July 2019. Approval was obtained from the institutional review board prior to patient recruitment at each institution. This trial was registered at the Japan Registry of Clinical Trials under trial no. jRCT2031190065 (<https://jrct.niph.go.jp>).

**METHODS AND ANALYSIS**

**Objectives**

The purpose of this trial is to verify the appropriate dose of metformin in a new fertility-sparing treatment involving a combination of metformin and MPA among patients

with AEH and EC. Further, this trial aims to investigate the long-term efficacy and safety of this combination therapy.

### Design of the trial

This trial is a prospective, randomized, open, blinded-endpoint design (PROBE), dose-response trial. Original Japanese protocol and informed consent form are provided in the online supplementary appendix 1,2, and this protocol meets the criteria of the Standard Protocol Items: Recommendations for Interventional Trials (SPIRIT) 2013 statement. The trial is being conducted in 15 institutions across Japan. A list of recruiting sites is provided in online supplementary appendix 3. A local principal investigator (PI), supported by at least two other staff members (such as a research nurse or clinical research coordinator), conducts the study at each participating site.

### Endpoints

The primary endpoint of the trial is the three-year relapse-free survival (RFS) rate, which indicates the achievement of remission without recurrence 3 years from the date of trial entry for all subjects.

The secondary endpoints are RFS rate, the overall response rate to MPA therapy, conception rate following treatment, the outcome of pregnancy, results of toxicity assessment, and

1  
2  
3  
4  
5  
6  
7  
8  
9  
10  
11  
12  
13  
14  
15  
16  
17  
18  
19  
20  
21  
22  
23  
24  
25  
26  
27  
28  
29  
30  
31  
32  
33  
34  
35  
36  
37  
38  
39  
40  
41  
42  
43  
44  
45  
46  
47  
48  
49  
50  
51  
52  
53  
54  
55  
56  
57  
58  
59  
60

changes in insulin resistance and body mass index (BMI). The RFS period was defined as the period from the date of trial entry to the time of recurrence after remission or to the time of exclusion from the trial due to non-remission. Cases of non-remission are defined as those that experience disease progression before 32 weeks and those that do not achieve remission by 32 weeks. The conception rate was defined as the rate of successful pregnancies among patients who were in remission and tried to have a child.

**Eligibility criteria**

All patients underwent a 75 g oral glucose tolerance test before registration for the evaluation of glucose intolerance and insulin resistance

**Inclusion criteria**

1. Histologically confirmed AEH or well-differentiated endometrioid adenocarcinoma, presumed to be International Federation of Gynecology and Obstetrics stage IA, and in which the EC was limited to the endometrium. Endometrial tissue sampling for diagnosis was performed by dilatation and curettage.
2. No prior treatment with a high dose of progestin, the levonorgestrel-releasing intrauterine system, or chemotherapy for an endometrial lesion (the uses of low or medium doses of a progestin for menstrual cycle regulation were permitted).

3. Over 20 years of age and under 42 years of age
4. Eastern Cooperative Oncology Group Performance Status 0
5. Fulfillment of each of the following parameters
  - 5.1. Leucocyte count  $\geq 3,000/\text{mm}^3$
  - 5.2. Platelet count  $\geq 10 \times 10^4/\text{mm}^3$
  - 5.3. Aspartate aminotransferase (glutamic-oxaloacetic transaminase) level less than twice the maximum institutional standard
  - 5.4. Alanine aminotransferase (glutamic-pyruvic transaminase) level less than twice the maximum institutional standard
  - 5.5. Serum creatinine concentration  $\leq 1.0 \text{ mg/dl}$
  - 5.6. Creatinine clearance  $\leq 60 \text{ L/min}$
  - 5.7. Total bilirubin level  $\leq 1.5 \text{ mg/dl}$
  - 5.8. D-dimer level  $< 1.5 \mu\text{g/ml}$
6. No prior medical history of chemical sensitivity to any of the chemicals being used in the trial (MPA and metformin)
7. No clinical problem on electrocardiography
8. The patient provided written informed consent

### Exclusion criteria

1. Contraindication to the drugs used in this trial (MPA and metformin)
  - 1.1. Susceptible to lactic acidosis
    - 1.1.1. A history of lactic acidosis
    - 1.1.2. Moderate to severe kidney damage or dialysis
    - 1.1.3. Severe liver damage
    - 1.1.4. Shock, cardiac arrest, cardiac infarction, thrombosis of the lung, or severe cardiovascular and/or lung damage
    - 1.1.5. Ingestion of excessive amounts of alcohol
    - 1.1.6. Gastrointestinal damage such as dehydration or diarrhea and/or vomiting that could cause dehydration
  - 1.2. Serious ketosis, diabetic coma or pre-coma, or type I diabetes
  - 1.3. Serious infections and/or injuries, a medical history including recent surgery, or the expectation that the patient will soon undergo surgery
  - 1.4. Malnourishment or starvation, hyposthenia, or pituitary and/or adrenal gland disorders
  - 1.5. Pregnancy or the expectation that the woman could be pregnant
  - 1.6. Prior medical history of chemical sensitivity to biguanides or the compounds present in the drugs being tested
  - 1.7. High risk of thrombosis

- 1.7.1. Surgery within the past week
- 1.7.2. Cerebral and/or cardiac infarction, thrombophlebitis, or a prior history thereof
- 1.7.3. Valvular heart disease, atrial fibrillation, endocarditis, or other serious cardiac conditions
- 1.7.4. The current administration of hormone treatments
- 1.8. Undiagnosed breast lesions or vaginal and/or urinary bleeding
- 1.9. Serious liver damage
- 1.10. Hypocalcemia
2. Psychosis or mental symptoms that could make it difficult for patients to participate in the trial
3. Uncontrolled diabetes mellitus
4. Diabetic patients who already take biguanides, including metformin (patients who manage their diabetes via diet and exercise therapy, or those who take medicines apart from metformin are eligible).
5. Concomitant malignancies
6. Systemic administration of steroids
7. Determined to be ineligible by the physician in charge for any other reason

## Randomization

1  
2  
3  
4  
5  
6  
7  
8  
9  
10  
11  
12  
13  
14  
15  
16  
17  
18  
19  
20  
21  
22  
23  
24  
25  
26  
27  
28  
29  
30  
31  
32  
33  
34  
35  
36  
37  
38  
39  
40  
41  
42  
43  
44  
45  
46  
47  
48  
49  
50  
51  
52  
53  
54  
55  
56  
57  
58  
59  
60

After confirming the fulfillment of the eligibility criteria, patients are randomly assigned to arm A (MPA alone group), arm B (MPA + metformin 750 mg / day group), and arm C (MPA + metformin 1500 mg / day group) in a 1:1:1 allocation via a dynamic and centralized randomization procedure implemented with the DATATRAK Electronic Data Capture system (DATATRAK ONE V.14.1.0; <https://secure.datatrak.net>). Minimization imbalance Method with a probability of 0.9 is used for randomization[19]. The stratification factors to be balanced across treatment arms are BMI, histology, and marital status.

**Treatment methods**

The patients are randomized into 3 treatment arms (Fig. 1).

Arm A (control) MPA alone group: Patients receive a daily oral dose of 600 mg of MPA for 32 weeks.

Arm B (experimental) MPA + metformin 750 mg/day group: Patients receive a daily oral dose of 600 mg of MPA for 32 weeks.

Patients simultaneously receive a daily dose of metformin (initial dose, 500 mg/day; increased monthly up to 750 mg/day if no adverse effects have developed) in combination with MPA from the initial point of treatment.

After MPA administration, metformin therapy is continued until conception or disease recurrence.

Arm C (experimental): MPA + metformin 1500 mg/day group:

Patients receive a daily oral dose of 600 mg of MPA for 32 weeks.

Patients simultaneously receive a daily dose of metformin (initial dose, 500 mg/day; increased monthly up to 1500 mg/day if no adverse effects have developed) in combination with MPA from the initial point of treatment.

After MPA administration, metformin therapy is continued until conception or disease recurrence.

Endometrial curettage under anesthesia will be performed to evaluate pathological response every 8 weeks. (Fig 2)

The protocol treatment was halted if MPA therapy did not result in remission, according to the following criteria: the absence of any hormonal effect by 16 weeks; disease progression at 8, 16, and 24 weeks; or no remission at 32 weeks. A combination of 100 mg of aspirin was permissible if patients received MPA.

### **Maintenance period**

1  
2  
3  
4  
5  
6  
7  
8  
9  
10  
11  
12  
13  
14  
15  
16  
17  
18  
19  
20  
21  
22  
23  
24  
25  
26  
27  
28  
29  
30  
31  
32  
33  
34  
35  
36  
37  
38  
39  
40  
41  
42  
43  
44  
45  
46  
47  
48  
49  
50  
51  
52  
53  
54  
55  
56  
57  
58  
59  
60

After completing the MPA treatment, only patients who achieved remission will enter the maintenance period. Follow up will be performed by conducting endometrial sampling with a pipelle or with any other appropriate equipment.. Patients are examined every three months until three years after the initial treatment (at the time of evaluation for the primary endpoint). After that, patients are examined every six months. If a patient desires to conceive in the immediate future, they are allowed to become pregnant immediately after achieving remission. Fertility treatment is recommended. A low dose of estrogen-progestin or medium doses of progestin is recommended for patients who do not desire to conceive, to control the menstrual cycle until they wish to conceive.

**Criteria for discontinuation of trial treatment**

The defined criteria for the discontinuation of trial medication are as follows:

1. The protocol treatment was halted if MPA therapy did not result in remission, according to the following criteria: the absence of any hormonal effect by 16 weeks; disease progression at 8, 16, and 24 weeks; or no remission at 32 weeks.
2. If the patients relapse after remission
3. Severe adverse effects (progressive or persistent) which in the opinion of the PI may be related to the study medication
4. Other situations, judged by the PI, in which MPA or metformin cannot be continued

### **Data management, monitoring, safety and auditing**

Monitors will ensure that the investigational team is complying with the study protocol and GCP standards, that the data and AEs are accurately and appropriately recorded in the eCRFs, that severe AEs (SAEs) are reported to the trial coordinator and the investigational drug provider, and that those meeting the SAE reporting criteria are reported to the institutional review board (IRB). AEs will be classified in accordance with the Medical Dictionary for Regulatory Activities, Japanese translation MedDRA/J V.22.0 (MedDRA Japanese Maintenance Organization, Tokyo, Japan). All participants with AEs are to be followed up during the course of the AE until their resolution, or for 4 weeks after the end of the trial. All SAEs will be reported to all investigators, discussed through a web-based AE reporting system, and will be reported to the Pharmaceuticals and Medical Devices Agency (PMDA), if necessary.

### **Data monitoring committee**

The data monitoring committee comprises three clinical trial specialists, including a biostatistician, who were not associated with the current study. The committee will meet at least twice a year and all the data obtained from the current trial will be checked by the committee.

1  
2  
3  
4  
5  
6  
7  
8  
9  
10  
11  
12  
13  
14  
15  
16  
17  
18  
19  
20  
21  
22  
23  
24  
25  
26  
27  
28  
29  
30  
31  
32  
33  
34  
35  
36  
37  
38  
39  
40  
41  
42  
43  
44  
45  
46  
47  
48  
49  
50  
51  
52  
53  
54  
55  
56  
57  
58  
59  
60

**Statistical analysis**

Primary endpoints

An analysis of the effectiveness of primary endpoints will be conducted on the full analysis set. The following closed testing procedure will be used to assess the three groups: MPA-alone group as the control group, the group with MPA plus metformin (750 mg), and the group with MPA plus metformin (1500 mg).

1. The MPA-alone, MPA plus metformin (750 mg), and MPA plus metformin (1500 mg) groups will be pooled and analyzed via a log-rank test. If the difference is significant, move to the next step; if not, terminate the procedure.
2. For the MPA-alone and the MPA plus metformin (1500 mg) groups, a log-rank test will be performed. If the difference is significant, move to the next step; if not, terminate the procedure.
3. For the MPA-alone and MPA plus metformin (750 mg) groups, a log-rank test will be performed. If the difference is significant, move to the next step; if not, terminate the procedure.
4. For the MPA plus metformin (750 mg) and MPA plus metformin (1500 mg) groups, a log-rank test will be performed.

## Secondary endpoints

The same analysis performed on primary endpoints will be applied to the per protocol set. In addition, an analysis based on the Cox proportional hazards model will be carried out by adjusting for necessary allocation factors and layers.

Other items to be evaluated are the complete response rate for the MPA treatment period; the rate of trial continuation for the MPA-alone and MPA plus metformin groups; the recurrence-free survival time and recurrence-free rate in each year for the maintenance period; BMI values and homeostatic model assessment of insulin resistance results of all response cases that expressed the desire to become pregnant; the proportion of patients that became pregnant at least once during the trial period; outcomes of pregnant patients (miscarriage, stillbirth, live birth, weeks of gestation), and of all response cases that expressed the desire to become pregnant; and the proportion of patients that gave birth to a child.

## Safety endpoints

In the analysis of secondary safety endpoints, the number and rate of adverse events in an adverse event rate safety analysis set will be evaluated. Particularly, we will evaluate items in which a grade 3 or greater adverse event will occur (grade 2 or greater in the case of neurotoxicity).

1  
2  
3  
4  
5  
6  
7  
8  
9  
10  
11  
12  
13  
14  
15  
16  
17  
18  
19  
20  
21  
22  
23  
24  
25  
26  
27  
28  
29  
30  
31  
32  
33  
34  
35  
36  
37  
38  
39  
40  
41  
42  
43  
44  
45  
46  
47  
48  
49  
50  
51  
52  
53  
54  
55  
56  
57  
58  
59  
60

**Target number of cases and the grounds for setting it**

Based on previous studies, the non-recurrence rate for the MPA-alone group was assumed to be 60% and the non-recurrence rate for the MPA plus metformin group 85%. The same setting was applied for both groups for the following items: the response rate during the MPA treatment period was 80%, the probability of withdrawal during the maintenance period was 5%, the probability of pregnancy was 10%, patients for whom the trial was terminate during pregnancy were treated as non-recurrence-in-trial cases, the two-tailed significance level was 5%, and the power was 80%.

Based on these configurations, the number of cases was calculated through simulation. As a result, the necessary number of cases per group is 40, and 120 in total. The number of patient allocation between AEH and EC has not been decided.

**Interim analysis and monitoring**

No interim analysis is planned.

**Patient and public involvement**

Patients and the public were not involved in the design of this trial.

## Ethics and dissemination

The trial will be conducted in accordance with the Ordinance on the Standards for the Implementation of Clinical Trials (GCP Ordinance) and the principles of the World Medical Association (WMA) Declaration of Helsinki. All participants will receive adequate information about the nature, purpose, possible risk and benefits of the trial, and about alternative therapeutic choices, using an informed consent form approved by the IRB at Chiba University Hospital and boards at 14 other institutions (The names of Ethics Committee: online supplementary appendix 4). The informed consent form, signed by the participant, is required for enrolment in the trial. We intend to publish results of the FELICA trial in a major journal.

## DISCUSSION

This trial was planned to determine the appropriate dose of metformin in a new fertility-sparing treatment involving a combination of metformin and MPA among patients with AEH and EC. To confirm the appropriate dose of metformin, the RFS rate was set as the primary endpoint.

In Japan, pharmaceutical approval for the dose of metformin was for a maximum of 2250 mg per day and only for patients with diabetes mellitus. The recommended maintenance dose of metformin was 750 to 1500 mg per day. In a previous phase 2 trial, metformin (initial dose,

1  
2  
3  
4  
5  
6  
7  
8  
9  
10  
11  
12  
13  
14  
15  
16  
17  
18  
19  
20  
21  
22  
23  
24  
25  
26  
27  
28  
29  
30  
31  
32  
33  
34  
35  
36  
37  
38  
39  
40  
41  
42  
43  
44  
45  
46  
47  
48  
49  
50  
51  
52  
53  
54  
55  
56  
57  
58  
59  
60

750 mg/day; increased weekly in increments of 750 mg/day up to 2,250 mg/day if no adverse effects occurred) was administered concurrently with MPA since initiation of treatment.[18] Although the dose was reduced to under 1500 mg per day in some patients, no difference was found in treatment efficacy between the 1500 mg and 2250 mg groups (unpublished data). To consider long-term feasibility, we set the maximum dose of this trial as 1500 mg per day. This protocol was agreed upon with regulatory strategy consultation of the Pharmaceuticals and Medical Devices Agency.

Most studies of fertility sparing treatments, including our previous phase 2 trial, have only evaluated relapse rates in remission patients.[3,4] An evaluation of the efficacy of metformin depends on both the response rate and recurrence rate; however, even if remission rates are low, if response rates are also low it may not necessarily mean that metformin is effective.

Therefore, we defined the three-year RFS rate as the primary endpoint of this trial. This means the achievement of remission without recurrence 3 years from the date of trial enrolment.

This trial has some strengths. First, we are able to evaluate the long-term efficacy of metformin because the primary endpoint of this trial is the 3-year RFS rate. Following the first phase 2 trial of metformin combined with progestin for fertility-sparing treatment of AEH and EC started in 2009 and reported on in 2016, there are five trials currently examining the effect of metformin in fertility-sparing treatment for AEH and EC

(NCT02035787, NCT03538704, NCT01968317, NCT02990728, NCT01686126). In these studies, the primary endpoint is set as the pathological response rate. However, only one phase 2 trial has reported on relapse rate as a secondary endpoint. Second, further evidence of the long-term efficacy of metformin will be based on continued metformin therapy following the conclusion of MPA administration, until conception or disease recurrence. Based on our previous phase 2 trial results, we hypothesized that metformin might prevent recurrence after remission. Metformin had indirect effects that were caused by the lowering of glucose and insulin levels, as described above. However, in ongoing trials, metformin is administered combined with progestin and is discontinued following remission. In these trials, only an anticancer effect of metformin was expected as an outcome. Finally, this trial will evaluate metabolic status. Most of the candidate patients for this trial were obese, consistent with insulin resistance and abnormal glucose metabolism. Based on our previous phase 2 trial, we will evaluate improvements in the metabolic profiles of these patients that are anticipated with the addition of metformin.

A limitation of this trial is that design is not that of a confirmatory trial. In addition, this trial will not use a placebo control group. However, evaluation of the remission and relapse rates, which are associated with the primary endpoint, will be performed by a pathological review board. The evaluation will occur under blind and independent conditions. Therefore, we believe that it will be possible to maintain objectivity and to reduce potential bias. Finally,

1  
2  
3  
4  
5  
6  
7  
8  
9  
10  
11  
12  
13  
14  
15  
16  
17  
18  
19  
20  
21  
22  
23  
24  
25  
26  
27  
28  
29  
30  
31  
32  
33  
34  
35  
36  
37  
38  
39  
40  
41  
42  
43  
44  
45  
46  
47  
48  
49  
50  
51  
52  
53  
54  
55  
56  
57  
58  
59  
60

the PMDA approved our protocol for conducting this study based on the PROBE design. Another limitation is small amount of participant. Subgroup analyses in AEH vs. EC groups, and analyses based on the BMI or status of insulin resistance are particularly interesting. However, since there are only 40 patients in each group, we speculate that the subgroup analysis may have insufficient power for detecting a significant difference between the groups.

This trial is expected to clarify the clinical advantages of the combination of metformin with progestin. If this trial reveals the appropriate dose of metformin and shows long-term efficacy, clinical use of metformin for fertility sparing treatment of EC will be advanced.

**Acknowledgements:** We would like to thank all the staff and patients involved with the study at the 15 research sites, and the Trial Steering Committee and Central Pathology Committee and Data Monitoring Committee for their ongoing support throughout the trial. We would like to acknowledge the role of the Clinical Research Centre, Chiba University Hospital in supporting the ongoing delivery of the trial at the sites.

**Contributors:** All authors (AM, MH, TF, HH MS) made a significant contribution to the conception and design of the trial protocol. AM made major contributions to the design of

1  
2  
3  
4 this trial, development of the original trial protocol, and drafting of the initial manuscript. YK  
5  
6  
7 developed the statistical analysis plan. All authors (AM, MH, TF, HH MS) read and  
8  
9  
10 approved the final protocol.  
11  
12  
13  
14  
15

16 **Funding:** This research is supported by the Japan Agency for Medical Research and  
17  
18  
19 Development under grant number JP19lk0201099.  
20  
21

22 **Competing interests:** HH has received personal fees from Torii Yakuhin, outside the  
23  
24  
25 submitted work. All remaining authors have declared no conflicts of interest.  
26  
27

28 **Patients consent:** Obtained  
29  
30

31 **Ethics approval:** The Institutional Review Board of each institution has approved the trial.  
32  
33

34 **Data sharing plan:** The data that support the findings of this study are available from the  
35  
36  
37 corresponding author on request. Ultimately, after the completion of this trial, publication of  
38  
39  
40 the study results and other information will be provided in Japan Registry of Clinical Trials.  
41  
42  
43  
44  
45

## 46 REFERENCES

47  
48

- 49 1. National Comprehensive Cancer Network [Internet]. Uterine Neoplasms: NCCN Clinical  
50  
51  
52 Practice Guidelines in Oncology (NCCN Guidelines®) [cited 2019 Feb 11].  
53  
54  
55 [https://www.nccn.org/professionals/physician\\_gls/pdf/uterine.pdf](https://www.nccn.org/professionals/physician_gls/pdf/uterine.pdf).  
56  
57  
58  
59  
60

1  
2  
3  
4  
5  
6  
7  
8  
9  
10  
11  
12  
13  
14  
15  
16  
17  
18  
19  
20  
21  
22  
23  
24  
25  
26  
27  
28  
29  
30  
31  
32  
33  
34  
35  
36  
37  
38  
39  
40  
41  
42  
43  
44  
45  
46  
47  
48  
49  
50  
51  
52  
53  
54  
55  
56  
57  
58  
59  
60

2. Rodolakis A, Biliatis I, Morice P, et al. European Society of Gynecological Oncology Task Force for Fertility Preservation: Clinical Recommendations for Fertility-Sparing Management in Young Endometrial Cancer Patients. *Int J Gynecol Cancer* 2015;25:1258–65.

3. Gunderson CC, Fader AN, Carson KA, Bristow RE. Oncologic and reproductive outcomes with progestin therapy in women with endometrial hyperplasia and grade 1 adenocarcinoma: a systematic review. *Gynecol Oncol* 2012;125:477–82.

4. Gallos ID, Yap J, Rajkhowa M, Luesley DM, Coomarasamy A, Gupta JK. Regression, relapse, and live birth rates with fertility-sparing therapy for endometrial cancer and atypical complex endometrial hyperplasia: a systematic review and meta-analysis. *Am J Obstet Gynecol* 2012;207:266.e1–12.

5. Wei J, Zhang W, Feng L, Gao W. Comparison of fertility-sparing treatments in patients with early endometrial cancer and atypical complex hyperplasia: A meta-analysis and systematic review. *Medicine (Baltimore)* 2017;96:e8034.

6. Calle EE, Kaaks R. Overweight, obesity and cancer: epidemiological evidence and proposed mechanisms. *Nat Rev Cancer* 2004;4:579–91.

7. Renehan AG, Tyson M, Egger M, Heller RF, Zwahlen M. Body-mass index and incidence of cancer: a systematic review and meta-analysis of prospective observational studies. *Lancet* 2008;371:569–78.

8. Bianchini F, Kaaks R, Vainio H. Overweight, obesity, and cancer risk. *Lancet Oncol* 2002;3:565–74.
9. Mitsuhashi A, Uehara T, Hanawa S, Shozu M. Prospective evaluation of abnormal glucose metabolism and insulin resistance in patients with atypical endometrial hyperplasia and endometrial cancer. *Support Care Cancer* 2017;25:1495–501.
10. Pollak M. The insulin and insulin-like growth factor receptor family in neoplasia: an update. *Nat Rev Cancer* 2012;12:159–69.
11. Hernandez AV, Pasupuleti V, Benites-Zapata VA, Thota P, Deshpande A, Perez-Lopez FR. Insulin resistance and endometrial cancer risk: A systemic review and meta-analysis. *Eur J Cancer* 2015;51:2747–58.
12. Evans JM, Donnelly LA, Emslie-Smith AM, Alessi DR, Morris AD. Metformin and reduced risk of cancer in diabetic patients. *BMJ* 2005;330:1304–5.
13. Heckman-Stoddard BM, DeCensi A, Sahasrabuddhe VV, Ford LG. Repurposing metformin for the prevention of cancer and cancer recurrence. *Diabetologia* 2017;60:1639–49.
14. Quinn BJ, Kitagawa H, Memmott RM, Gills JJ, Dennis PA. Repositioning metformin for cancer prevention and treatment. *Trends Endocrinol Metab* 2013;24:469–80.
15. Pernicova I, Korbonits M. Metformin--mode of action and clinical implications for diabetes and cancer. *Nat Rev Endocrinol* 2014;10:143–56.

1  
2  
3  
4  
5  
6  
7  
8  
9  
10  
11  
12  
13  
14  
15  
16  
17  
18  
19  
20  
21  
22  
23  
24  
25  
26  
27  
28  
29  
30  
31  
32  
33  
34  
35  
36  
37  
38  
39  
40  
41  
42  
43  
44  
45  
46  
47  
48  
49  
50  
51  
52  
53  
54  
55  
56  
57  
58  
59  
60

16. Nestler JE. Metformin for the treatment of the polycystic ovary syndrome. *N Engl J Med* 2008;358:47–54.

17. Practice Committee of the American Society for Reproductive Medicine. Role of metformin for ovulation induction in infertile patients with polycystic ovary syndrome (PCOS): a guideline. *Fertil Steril* 2017;108:426–41

18. Mitsuhashi A, Sato Y, Kiyokawa T, Koshizaka M, Hanaoka H, Shozu M. Phase II study of medroxyprogesterone acetate plus metformin as a fertility-sparing treatment for atypical endometrial hyperplasia and endometrial cancer. *Ann Oncol* 2016;27:262–6.

19. SJ Pocock, R Simon, Sequential treatment assignment with balancing for prognostic factors in the controlled clinical trial, *Biometrics*, 31 (1975), pp. 103-115.

**Figure legend**

Figure 1. Trial design. MPA, medroxyprogesterone acetate; pCR, pathological complete response

Figure 2. Judgement of remission flow chart during treatment period

- \*1, The protocol treatment is halted;
- \*2, Fertility treatment or menstrual control;

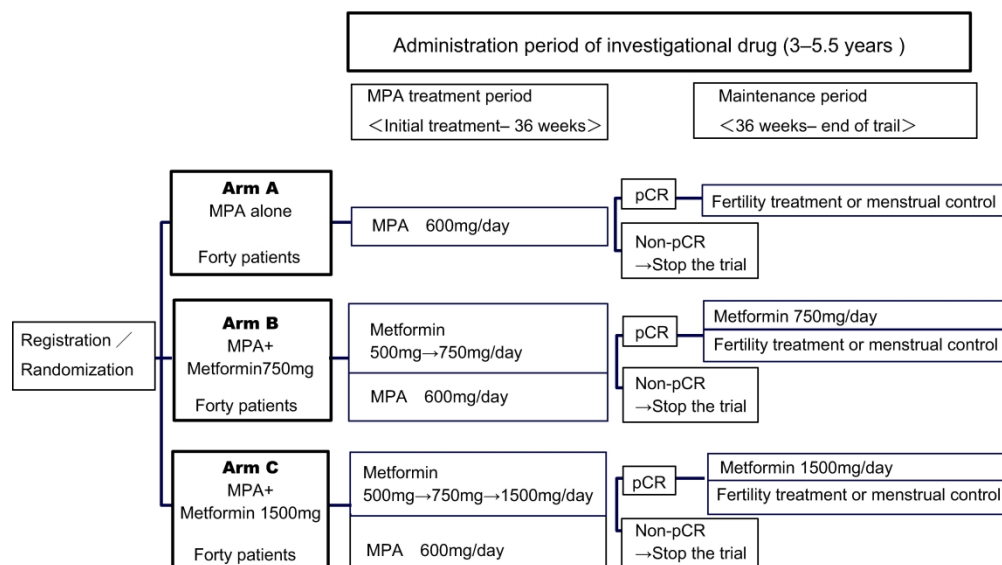

FIGURE 1

249x187mm (600 x 600 DPI)



## 治験実施計画書

### 子宮内膜異型増殖症・子宮体癌に対するメドロキシプロゲステロンと メトホルミンの併用妊孕性温存療法の用量反応性試験

Medroxyprogesterone acetate plus metformin for fertility-sparing treatment of atypical endometrial hyperplasia and endometrial carcinoma: a prospective, randomized, open, blinded-endpoint design, dose response trial (FELICIA Trial)

治験実施計画書番号 : Chiba-Met003

版数 : 第 2.0 版

作成日 : 2019 年 11 月 15 日

#### 改訂履歴

| 作成日              | 版数      |
|------------------|---------|
| 2019 年 5 月 24 日  | 第 1.0 版 |
| 2019 年 6 月 12 日  | 第 1.1 版 |
| 2019 年 8 月 21 日  | 第 1.2 版 |
| 2019 年 11 月 15 日 | 第 2.0 版 |

#### 機密情報に関する注意

本治験実施計画書は機密情報であり、本治験に参加する治験責任医師、治験分担医師、治験協力者、治験実施医療機関、治験審査委員会（または治験審査委員会に該当する組織）、データモニタリング委員会に対して提供されるものです。よって、被験者に説明する場合を除き、治験責任医師及びメトホルミン提供者である日本新薬株式会社の文書による同意なしに、第三者へ開示すること、及び本治験の目的以外に利用することはできません。また、本治験の結果の一部または全部を学会、雑誌等外部に発表する場合には、治験責任医師及び日本新薬株式会社の承諾が必要となりますので、予め治験調整医師までご連絡頂けますようお願いいたします。

| 略号・略記        | 英語表記                                                              | 日本語表記                                          |
|--------------|-------------------------------------------------------------------|------------------------------------------------|
| PCOS         | Polycystic ovary syndrome                                         | 多嚢胞性卵巣症候群                                      |
| MPA          | Medroxyprogesterone acetate                                       | メドロキシプロゲステロン酢酸エステル                             |
| BMI          | Body Mass Index                                                   | ボディマス指数                                        |
| IGFBP-1      | Insulin-like growth factor-binding protein                        | インスリン様増殖因子結合タンパク                               |
| PI3K         | Phosphatidylinositol-3 kinase                                     | ホスファチジルイノシトール 3-キナーゼ                           |
| MAPK         | Mitogen-activated protein kinase                                  | マイトジェン活性化プロテインキナーゼ                             |
| IGF-1        | Insulin-like growth factor 1                                      | インスリン様増殖因子 1                                   |
| GLUT4        | Glucose transporter 4                                             | グルコーストランスポーター4                                 |
| mTOR         | Mammalian target of rapamycin                                     | 哺乳類ラパマイシン標的タンパク質                               |
| cyclinD1     | cyclinD                                                           | サイクリン D1                                       |
| AST<br>(GOT) | Aspartate aminotransferase<br>(Glutamic oxaloacetic transaminase) | アスパラギン酸アミノトランスフェラーゼ<br>(グルタミン酸オキサロ酢酸トランスアミナーゼ) |
| ALT<br>(GPT) | Alanine aminotransferase<br>(Glutamic pyruvic transaminase)       | アラニンアミノトランスフェラーゼ<br>(グルタミン酸ピルビン酸トランスアミナーゼ)     |
| PS<br>(ECOG) | Performance Status<br>(Eastern Cooperative Oncology Group)        | 一般状態 (ECOG)                                    |
| OGTT         | Oral glucose tolerance test                                       | 経口ブドウ糖負荷試験                                     |
| ALP          | Alkali phosphatase                                                | アルカリホスファターゼ                                    |
| UA           | Uric acid                                                         | 尿酸                                             |
| Cr           | Creatinine                                                        | クレアチニン                                         |
| LDL          | Low density lipoprotein                                           | 低比重リポタンパク                                      |
| TG           | Triacylglycerol                                                   | 中性脂肪                                           |
| HOMA-R       | Homeostasis model assessment ratio                                | インスリン抵抗性指数 <sup>ホーマーアール</sup> HOMA- R          |
| HbA1c        | Hemoglobin A1c                                                    | <sup>エーワンシー</sup> ヘモグロビン A 1 c                 |
| LH           | Luteinizing hormone                                               | 黄体形成ホルモン                                       |
| FSH          | Follicle stimulating hormone                                      | 卵胞刺激ホルモン                                       |
| PRL          | Prolactin                                                         | プロラクチン                                         |
| E2           | Estradiol                                                         | エストラジオール                                       |
| CR           | Complete response                                                 | 完全奏効                                           |
| PR           | Partial response                                                  | 部分奏効                                           |
| SD           | Stable disease                                                    | 不変                                             |
| DFS          | Disease free survival                                             | 無病生存率あるいは期間                                    |
| MRI          | Magnetic resonance imaging                                        | 磁気共鳴映像                                         |
| CT           | Computed tomography scanning                                      | コンピュータ断層撮影                                     |
| CTCAE        | Common Terminology Criteria for Adverse Events                    | 有害事象 共通用語規準                                    |

## 目次

|        |                                     |    |
|--------|-------------------------------------|----|
| 0.     | 治験の概要                               | 7  |
| 1.     | 治験の背景                               | 14 |
| 1.1.   | 対象疾患                                | 14 |
| 1.2.   | 妊孕性温存療法における標準治療                     | 15 |
| 1.3.   | 治験薬について                             | 16 |
| 1.4.   | 治験薬の対象疾患に対する治療効果・試験成績               | 17 |
| 2.     | 治験の目的と必要性                           | 18 |
| 2.1.   | 治験の目的と意義                            | 18 |
| 2.2.   | 本治験参加により予想される利益                     | 19 |
| 2.3.   | 本治験参加により予想される不利益                    | 19 |
| 3.     | 本治験で用いる基準・定義                        | 20 |
| 3.1.   | 病期分類                                | 20 |
| 3.2.   | 効果判定                                | 20 |
| 3.3.   | 有害事象評価                              | 20 |
| 3.4.   | PERFORMANCE STATUS (PS)             | 20 |
| 3.5.   | 子宮内膜精密検査                            | 21 |
| 4.     | 対象患者                                | 21 |
| 4.1.   | 選択基準                                | 21 |
| 4.2.   | 除外基準                                | 22 |
| 5.     | 被験者の同意                              | 23 |
| 5.1.   | 同意文書及びその他の説明文書の作成並びに改訂              | 23 |
| 5.2.   | 同意取得の時期と方法                          | 23 |
| 5.3.   | 被験者に対する説明事項                         | 24 |
| 6.     | 治験の方法                               | 25 |
| 6.1.   | 治験のデザイン                             | 25 |
| 6.2.   | 治験のアウトライン                           | 26 |
| 6.3.   | 目標被験者数と治験実施期間                       | 26 |
| 6.4.   | 施設登録及び症例登録・割付方法                     | 27 |
| 6.4.1. | 施設登録                                | 27 |
| 6.4.2. | 症例登録・割付                             | 27 |
| 6.4.3. | 割付調整因子                              | 28 |
| 6.4.4. | 登録例の中央病理診断                          | 28 |
| 6.5.   | 登録されなかった被験者の取り扱い                    | 29 |
| 6.6.   | 投与スケジュール及び投与量・投与方法                  | 29 |
| 6.7.   | 治験薬及び併用薬の減量・休薬基準                    | 33 |
| 6.7.1. | 第Ⅰ期におけるMPA及びメトホルミンの減量・休薬・再開・中止基準    | 33 |
| 6.7.2. | 第Ⅱ期におけるメトホルミンの減量・休薬・再開・中止基準 (B,C 群) | 35 |
| 6.7.3. | メトホルミンの増量基準                         | 37 |

|          |                                       |    |
|----------|---------------------------------------|----|
| 6.8.     | 妊娠の可能性・妊娠が判明した場合の取扱い                  | 37 |
| 6.9.     | 個々の症例の完了・中止基準                         | 38 |
| 6.9.1.   | 完了基準                                  | 38 |
| 6.9.2.   | 中止基準                                  | 38 |
| 6.10.    | 服薬状況調査の報告                             | 39 |
| 6.11.    | 併用薬・併用療法                              | 40 |
| 6.11.1.  | 情報収集する併用薬・併用療法                        | 40 |
| 6.11.2.  | 有害事象・合併症の対症療法                         | 40 |
| 6.12.    | 併用禁止薬・併用禁止療法                          | 41 |
| 6.13.    | 治験終了後の後治療                             | 41 |
| 7.       | 治験薬                                   | 41 |
| 7.1.     | 治験薬の概要                                | 41 |
| 7.2.     | 治験薬の包装・表示                             | 44 |
| 7.3.     | 治験薬の管理方法                              | 44 |
| 7.4.     | 併用薬                                   | 45 |
| 8.       | 観察・検査・評価項目、方法及び実施時期                   | 47 |
| 8.1.     | 実施スケジュールと手順                           | 47 |
| 8.1.1.   | スクリーニング検査                             | 50 |
| 8.1.2.   | 第Ⅰ期の観察・検査・評価項目                        | 51 |
| 8.1.2.1. | 0週(0か月)                               | 51 |
| 8.1.2.2. | 4週(1か月)、12週(3か月)、20週(5か月)、28週(7か月)    | 51 |
| 8.1.2.3. | 8週(2か月)、16週(4か月)、24週(6か月)             | 51 |
| 8.1.2.4. | 32週(8か月)                              | 52 |
| 8.1.2.5. | 寛解判定(36週,9か月)                         | 53 |
| 8.1.2.6. | 第Ⅰ期における中止時                            | 53 |
| 8.1.3.   | 第Ⅱ期の観察・検査・評価項目                        | 53 |
| 8.1.3.1. | 12週(3か月)毎(12、24、36、48、60、…、240、252週)  | 53 |
| 8.1.3.2. | 24週(6か月)毎(24、48、72、96、120、…、216、240週) | 54 |
| 8.1.3.3. | 第Ⅱ期における中止時                            | 54 |
| 8.1.4.   | 必要に応じて実施する安全性評価項目                     | 55 |
| 8.1.5.   | 完了時                                   | 55 |
| 8.1.6.   | 妊娠時                                   | 56 |
| 9.       | 有害事象発生時の取扱い                           | 56 |
| 9.1.     | 有害事象の定義                               | 56 |
| 9.2.     | 有害事象発生時の被験者への対応                       | 56 |
| 9.3.     | 報告の対象となる有害事象                          | 57 |
| 9.4.     | 有害事象の評価に必要な記載内容                       | 57 |
| 9.4.1.   | 有害事象の回復性と治験薬との因果関係                    | 57 |
| 9.5.     | 重篤な有害事象発生時の取り扱い                       | 58 |
| 9.5.1.   | 重篤な有害事象の定義                            | 58 |
| 9.5.2.   | 重篤な有害事象の報告手順                          | 58 |
| 9.6.     | 重要な有害事象の報告                            | 59 |

|           |                                          |    |
|-----------|------------------------------------------|----|
| 9.7.      | 予測される副作用                                 | 60 |
| 9.8.      | 重篤な有害事象の報告入手後の治験調整医師/調整事務局の対応手順          | 60 |
| 9.8.1.    | 独立データモニタリング委員会への報告                       | 60 |
| 9.8.2.    | 試験参加施設及び関連機関への連絡                         | 61 |
| 9.9.      | 緊急時の連絡先                                  | 61 |
| 10.       | 評価項目                                     | 61 |
| 10.1.     | 効果判定とエンドポイントの定義                          | 61 |
| 10.1.1.   | 用語の定義                                    | 61 |
| 10.1.2.   | MPA 治療の寛解                                | 62 |
| 10.1.3.   | 寛解・再発時の中央病理診断                            | 62 |
| 10.1.3.1. | 寛解判定                                     | 62 |
| 10.1.3.2. | 再発判定                                     | 63 |
| 10.1.4.   | エンドポイントの定義                               | 63 |
| 10.1.4.1. | 3 年無再発生存割合                               | 63 |
| 10.1.5.   | 寛解・寛解日                                   | 64 |
| 10.1.6.   | 再発(Relapse)                              | 64 |
| 10.1.7.   | 完全奏効割合                                   | 64 |
| 10.1.8.   | 無再発生存期間                                  | 64 |
| 10.2.     | 主要評価項目                                   | 65 |
| 10.3.     | 副次評価項目                                   | 65 |
| 11.       | 統計学的事項                                   | 65 |
| 11.1.     | 解析対象集団                                   | 66 |
| 11.1.1.   | 全登録例                                     | 66 |
| 11.1.2.   | 最大の解析対象集団 (full analysis set: FAS)       | 66 |
| 11.1.3.   | 治験実施計画書に適合した対象集団 (per protocol set: PPS) | 66 |
| 11.1.4.   | 安全性解析対象集団                                | 66 |
| 11.2.     | 目標症例数と設定根拠                               | 66 |
| 11.3.     | 症例の取り扱い                                  | 68 |
| 11.4.     | データの取り扱い                                 | 68 |
| 11.5.     | 統計解析項目及び解析計画                             | 68 |
| 11.5.1.   | 有効性の解析                                   | 68 |
| 11.5.1.1. | 主要評価項目                                   | 68 |
| 11.5.1.2. | 副次評価項目                                   | 69 |
| 11.5.2.   | 安全性の評価                                   | 70 |
| 11.5.3.   | 中間解析と治験の早期中止                             | 71 |
| 11.6.     | 独立データモニタリング委員会                           | 71 |
| 11.7.     | 最終解析                                     | 71 |
| 12.       | 治験実施計画書の遵守及び逸脱                           | 71 |
| 13.       | 治験実施計画書、症例報告書又は解析計画に関する変更                | 72 |
| 13.1.     | 治験実施計画書及び症例報告書の改訂                        | 72 |
| 13.2.     | 統計解析計画の変更                                | 72 |
| 14.       | 治験の中止、中断または終了                            | 72 |

1  
2  
3  
4  
5  
6  
7  
8  
9  
10  
11  
12  
13  
14  
15  
16  
17  
18  
19  
20  
21  
22  
23  
24  
25  
26  
27  
28  
29  
30  
31  
32  
33  
34  
35  
36  
37  
38  
39  
40  
41  
42  
43  
44  
45  
46  
47  
48  
49  
50  
51  
52  
53  
54  
55  
56  
57  
58  
59  
60

14.1. 治験全体での中止または中断の基準 ..... 72

14.2. 治験全体での中止又は中断する場合の手続き ..... 73

14.3. 個々の実施医療機関での治験を中止または中断する場合の手続き ..... 73

14.4. 治験の終了 ..... 73

15. データマネジメント ..... 74

15.1. データマネジメントの手順 ..... 74

15.2. データの収集 ..... 74

15.3. 症例報告書に直接記載され、かつ原資料(原データ)と解すべき資料の特定 ..... 74

16. 原資料及びその他の記録の取扱い ..... 75

16.1. 治験実施医療機関による記録の保存 ..... 75

16.2. 治験責任医師による記録の保存 ..... 75

16.3. 病理標本の取扱い ..... 75

17. 原資料の直接閲覧 ..... 76

18. 治験の品質管理及び品質保証 ..... 76

18.1. 品質管理 ..... 76

18.2. 品質保証 ..... 77

19. 倫理及び GCP ..... 77

20. 治験審査委員会 ..... 77

21. 健康被害補償及び保険 ..... 78

21.1. 健康被害の補償 ..... 78

21.2. 賠償保険への加入 ..... 78

22. 金銭の支払い ..... 78

23. 研究結果の発表 ..... 78

23.1. 論文発表の AUTHORSHIP 等に関する取り決め ..... 78

23.2. データ公開について ..... 79

24. 資金及び利益の衝突 ..... 79

25. 治験実施体制 ..... 79

26. 参考資料・文献リスト ..... 80

## 0. 治験の概要

|            |                                                                                                                                                                                                                                                                                                                                                                                                                                                                                                                                                                                                                                                                                                                                                                                                                  |        |                          |        |                                        |            |                |            |                |            |             |
|------------|------------------------------------------------------------------------------------------------------------------------------------------------------------------------------------------------------------------------------------------------------------------------------------------------------------------------------------------------------------------------------------------------------------------------------------------------------------------------------------------------------------------------------------------------------------------------------------------------------------------------------------------------------------------------------------------------------------------------------------------------------------------------------------------------------------------|--------|--------------------------|--------|----------------------------------------|------------|----------------|------------|----------------|------------|-------------|
| 治験課題名      | 子宮内膜異型増殖症・子宮体癌に対するメドロキシプロゲステロンとメトホルミンの併用妊孕性温存療法の用量反応性試験                                                                                                                                                                                                                                                                                                                                                                                                                                                                                                                                                                                                                                                                                                                                                          |        |                          |        |                                        |            |                |            |                |            |             |
| 治験の目的      | 子宮内膜異型増殖症及び子宮体癌患者に対する妊孕性温存療法としてメドロキシプロゲステロン（MPA）とメトホルミンを併用する新規治療法において、メトホルミンの適切な用量を検討することである。副次的に、メトホルミン併用療法の長期有効性・安全性を検討する。                                                                                                                                                                                                                                                                                                                                                                                                                                                                                                                                                                                                                                                                                     |        |                          |        |                                        |            |                |            |                |            |             |
| 治験デザイン     | 多施設共同、3用量群、オープン、ランダム化比較試験                                                                                                                                                                                                                                                                                                                                                                                                                                                                                                                                                                                                                                                                                                                                                                                        |        |                          |        |                                        |            |                |            |                |            |             |
| フェーズ       | 第 IIb 相試験＋長期有効性・安全性試験                                                                                                                                                                                                                                                                                                                                                                                                                                                                                                                                                                                                                                                                                                                                                                                            |        |                          |        |                                        |            |                |            |                |            |             |
| 被験薬        | 一般名：メトホルミン塩酸塩<br>剤型：錠剤（TAB）<br>保存条件：室温                                                                                                                                                                                                                                                                                                                                                                                                                                                                                                                                                                                                                                                                                                                                                                           |        |                          |        |                                        |            |                |            |                |            |             |
| 選択基準       | <p>以下のすべての条件に該当する患者を対象とする。</p> <p>(1) 文書同意取得前 24 週（168 日）から登録前までに行った子宮内膜検査において、組織学的に子宮内膜異型増殖症もしくは高分化型類内膜癌の確定診断が得られている患者で、麻酔下の子宮内膜全面搔爬術により他の組織型癌が否定されている患者。子宮体癌症例においては、文書同意取得前 8 週（56 日）から登録前までに行った CT・MRI・超音波検査で筋層浸潤・リンパ節転移・遠隔転移を認めない患者。</p> <p>(2) 子宮内膜異型増殖症もしくは高分化型類内膜癌に対する前治療歴（高用量黄体ホルモン療法、ミレーナ、化学療法）のない患者。月経調整目的のホルモン剤、低用量ピルの使用歴は可。</p> <p>(3) 同意取得時の年齢が、20 歳以上、42 歳以下である患者。</p> <p>(4) ECOG Performance status（PS）が 0 である患者。</p> <p>(5) 文書同意取得後、登録前 28 日以内の臨床検査値が、以下のすべてを満たす患者。</p> <table border="0"> <tr> <td>① 白血球数</td><td>3,000/mm<sup>3</sup> 以上</td></tr> <tr> <td>② 血小板数</td><td>10×10<sup>4</sup>/mm<sup>3</sup> 以上</td></tr> <tr> <td>③ AST（GOT）</td><td>施設基準値上限の 2 倍以下</td></tr> <tr> <td>④ ALT（GPT）</td><td>施設基準値上限の 2 倍以下</td></tr> <tr> <td>⑤ 血清クレアチニン</td><td>1.0mg/dl 以下</td></tr> </table> | ① 白血球数 | 3,000/mm <sup>3</sup> 以上 | ② 血小板数 | 10×10 <sup>4</sup> /mm <sup>3</sup> 以上 | ③ AST（GOT） | 施設基準値上限の 2 倍以下 | ④ ALT（GPT） | 施設基準値上限の 2 倍以下 | ⑤ 血清クレアチニン | 1.0mg/dl 以下 |
| ① 白血球数     | 3,000/mm <sup>3</sup> 以上                                                                                                                                                                                                                                                                                                                                                                                                                                                                                                                                                                                                                                                                                                                                                                                         |        |                          |        |                                        |            |                |            |                |            |             |
| ② 血小板数     | 10×10 <sup>4</sup> /mm <sup>3</sup> 以上                                                                                                                                                                                                                                                                                                                                                                                                                                                                                                                                                                                                                                                                                                                                                                           |        |                          |        |                                        |            |                |            |                |            |             |
| ③ AST（GOT） | 施設基準値上限の 2 倍以下                                                                                                                                                                                                                                                                                                                                                                                                                                                                                                                                                                                                                                                                                                                                                                                                   |        |                          |        |                                        |            |                |            |                |            |             |
| ④ ALT（GPT） | 施設基準値上限の 2 倍以下                                                                                                                                                                                                                                                                                                                                                                                                                                                                                                                                                                                                                                                                                                                                                                                                   |        |                          |        |                                        |            |                |            |                |            |             |
| ⑤ 血清クレアチニン | 1.0mg/dl 以下                                                                                                                                                                                                                                                                                                                                                                                                                                                                                                                                                                                                                                                                                                                                                                                                      |        |                          |        |                                        |            |                |            |                |            |             |

|      |                                                                                                                                                                                                                                                                                                                                                                                                                                                                                                                                                                                                                                                                                                             |
|------|-------------------------------------------------------------------------------------------------------------------------------------------------------------------------------------------------------------------------------------------------------------------------------------------------------------------------------------------------------------------------------------------------------------------------------------------------------------------------------------------------------------------------------------------------------------------------------------------------------------------------------------------------------------------------------------------------------------|
|      | <p>⑥ クレアチニンクリアランス 60mL/min 以上<br/>(eGFR)</p> <p>⑦ 総ビリルビン 1.5mg/dl 以下</p> <p>⑧ D-ダイマー 1.5µg/ml 未満</p> <p>(6) 本治験使用薬剤 (MPA、メトホルミン) に対し過敏症の既往歴のない患者。</p> <p>(7) 文書同意取得後、登録前 28 日以内に行った心電図検査において臨床<br/>上問題となる異常所見が認められない患者。</p> <p>(8) 本治験参加について十分な説明を受けた後、十分な理解の上、患者<br/>本人から文書で同意が得られた患者。</p>                                                                                                                                                                                                                                                                                                                                                                                                                 |
| 除外基準 | <p>以下のいずれかの条件に該当する者は対象としない。</p> <p>(1) 本治験使用薬剤 (MPA、メトホルミン) に対し禁忌の患者。</p> <p>① 乳酸アシドーシスを起こしやすい患者。<br/>(乳酸アシドーシスの既往がある/中等度以上の腎機能障害/透<br/>析患者/重度の肝機能障害/ショック、心不全、心筋梗塞、肺塞<br/>栓等心血管系、肺機能に高度の障害のある患者及びその他の<br/>低酸素血症を伴いやすい状態/過度のアルコール摂取者/脱水<br/>者、脱水状態が懸念される下痢、嘔吐等の胃腸障害のある患<br/>者。)</p> <p>② 重症ケトーシス、糖尿病性昏睡または前昏睡、Ⅰ型糖尿病患<br/>者。</p> <p>③ 重症感染症、手術前後、重篤な外傷のある患者。</p> <p>④ 栄養不良状態、飢餓状態、衰弱状態、脳下垂体機能不全また<br/>は副腎機能不全の患者。</p> <p>⑤ 妊婦または妊娠している可能性のある婦人。</p> <p>⑥ 治験薬 (メトホルミン) の成分又はビグアナイド系薬剤に対<br/>し過敏症の既往歴のある患者。</p> <p>⑦ 血栓症を起こすおそれの高い患者。<br/>(手術後 1 週間以内の患者/脳梗塞、心筋梗塞、血栓静脈炎等<br/>の血栓性疾患又はその既往歴のある患者/動脈硬化症の患者/心<br/>臓弁膜症、心房細動、心内膜炎、重篤な心不全の心疾患のあ<br/>る患者/他のホルモン剤を投与されている患者) 。</p> <p>⑧ 診断未確定の性器出血、尿路出血、乳房病変のある患者。</p> |

|      |                                                                                                                                                                                                                                                                                                                                                                                                                                      |
|------|--------------------------------------------------------------------------------------------------------------------------------------------------------------------------------------------------------------------------------------------------------------------------------------------------------------------------------------------------------------------------------------------------------------------------------------|
|      | <p>⑨ 重篤な肝障害のある患者。</p> <p>⑩ 高カルシウム血症の患者。</p> <p>(2) 精神病または精神症状を合併しており、治験への参加が困難と判断される患者。</p> <p>(3) コントロール不良の糖尿病患者。</p> <p>(4) メトホルミンを含むビグアナイド系糖尿病治療薬を服用している糖尿病患者（食事・運動療法、ビグアナイド系以外の内服治療症例は可。）。</p> <p>(5) 活動性の重複癌を有する患者。</p> <p>(6) ステロイド剤の継続的な全身投与（内服または静脈内）を受けている患者。</p> <p>(7) その他、主治医が不適格と判断した患者。</p>                                                                                                                            |
| 評価項目 | <p><b>主要評価項目</b></p> <p>3 年時無再発生存割合</p> <p><b>副次評価項目</b></p> <p>【有効性の副次評価項目】</p> <p>完全奏功割合、無再発生存期間、インスリン抵抗性・BMI 改善割合、妊娠率、妊娠・周産期予後</p> <p>【安全性の副次評価項目】</p> <p>有害事象発生割合</p>                                                                                                                                                                                                                                                            |
| 試験方法 | <p><b>【MPA 単独群：A 群】</b></p> <p>■ 第Ⅰ期</p> <ul style="list-style-type: none"> <li>併用薬（MPA）は初回処方日（0 週 Day-1）の翌日から服用開始する。初回処方日の翌日を治療期の開始日（Day1）と定義する。0 週 Day-1 の来院は、原則として登録後 14 日以内とする。</li> <li>MPA の服用量 1 日 600mg とし、36 週来院時（寛解判定日）まで服用する。</li> <li>MPA 服用中は血栓予防を目的として低用量アスピリンの併用を許容する。</li> </ul> <p><b>経過観察と効果判定</b></p> <ul style="list-style-type: none"> <li>第Ⅰ期は 4 週毎に外来経過観察を行う。8 週毎に麻酔下全面掻爬術による子宮内膜組織診を施行し、効果判定を行なう。</li> </ul> |

|  |                                                                                                                                                                                                                                                                                                                                                                                                                                                                                                                                                                                                                                                                                                                                                                                                                                                                                                                                                                                                                                                                                                                                                                                                                                                           |
|--|-----------------------------------------------------------------------------------------------------------------------------------------------------------------------------------------------------------------------------------------------------------------------------------------------------------------------------------------------------------------------------------------------------------------------------------------------------------------------------------------------------------------------------------------------------------------------------------------------------------------------------------------------------------------------------------------------------------------------------------------------------------------------------------------------------------------------------------------------------------------------------------------------------------------------------------------------------------------------------------------------------------------------------------------------------------------------------------------------------------------------------------------------------------------------------------------------------------------------------------------------------------|
|  | <ul style="list-style-type: none"> <li>効果判定は掻爬術施行後初回の外来までに行なうことを原則とし、判定結果が出るまで MPA 投与を継続する。効果判定は掻爬術施行から 5 週まで（+1 週）を許容するが、32 週時点の効果判定〔寛解判定〕は 4 週以内に行うこととする。</li> <li>32 週時に CR が得られた症例を寛解とし、第Ⅱ期の治療に移行する。</li> <li>32 週時に CR が得られない症例は非寛解として治験中止とする。</li> </ul> <p>■ 第Ⅱ期</p> <ul style="list-style-type: none"> <li>妊娠を希望しない症例は、原則治験完了まで月経コントロールを施行する（6.11 併用薬・併用療法 参照）。</li> <li>挙児希望症例に対しては直ちに妊娠を許可する。ただし一定期間月経コントロールを行うかどうかは施設ごとの判断で行う。</li> <li>挙児希望症例はなるべく不妊治療を行い、短期間での妊娠をめざす。</li> </ul> <p>【メトホルミン 750mg 群：B 群】</p> <p>■ 第Ⅰ期</p> <ul style="list-style-type: none"> <li>MPA は、1 日 600mg を 36 週来院時（寛解判定日）まで投与する。</li> <li>MPA は治験薬（メトホルミン）と同時に服用開始する。</li> <li>MPA 服用中は血栓予防を目的として低用量アスピリンの併用を許容する。</li> </ul> <p><u>治験薬の投与</u></p> <ul style="list-style-type: none"> <li>治験薬（メトホルミン）は初回処方日（0 週 Day-1）の翌日から服用開始する。初回処方日の翌日を治療期の開始日（Day1）と定義する。0 週 Day-1 の来院は、原則として登録後 14 日以内とする。</li> <li>メトホルミンの初回投与は 500mg（250mg×2、分 2）とする。</li> <li>メトホルミン開始 4 週間の経過観察後に、6.7.3 増量基準に従い、750mg（250mg×3、分 3）に増量する。</li> <li>以後、6.7 減量・休薬基準に従い、適切に減量、休薬を行なう。ただし、最大投与量を 750mg とする。</li> <li>全面掻爬術施行時は、当日のメトホルミン服用は中断する。</li> </ul> <p><u>経過観察と効果判定</u></p> <ul style="list-style-type: none"> <li>第Ⅰ期は 4 週毎に外来経過観察を行う。8 週毎に麻酔下全面掻爬術による子宮内膜組織診を施行し、効果判定を行なう。</li> </ul> |
|--|-----------------------------------------------------------------------------------------------------------------------------------------------------------------------------------------------------------------------------------------------------------------------------------------------------------------------------------------------------------------------------------------------------------------------------------------------------------------------------------------------------------------------------------------------------------------------------------------------------------------------------------------------------------------------------------------------------------------------------------------------------------------------------------------------------------------------------------------------------------------------------------------------------------------------------------------------------------------------------------------------------------------------------------------------------------------------------------------------------------------------------------------------------------------------------------------------------------------------------------------------------------|

|  |                                                                                                                                                                                                                                                                                                                                                                                                                                                                                                                                                                                                                                                                                                                                                                                                                                                                                                                                                                                                                                                                                                                                                                                                                                                                                            |
|--|--------------------------------------------------------------------------------------------------------------------------------------------------------------------------------------------------------------------------------------------------------------------------------------------------------------------------------------------------------------------------------------------------------------------------------------------------------------------------------------------------------------------------------------------------------------------------------------------------------------------------------------------------------------------------------------------------------------------------------------------------------------------------------------------------------------------------------------------------------------------------------------------------------------------------------------------------------------------------------------------------------------------------------------------------------------------------------------------------------------------------------------------------------------------------------------------------------------------------------------------------------------------------------------------|
|  | <ul style="list-style-type: none"> <li>効果判定は掻爬術施行後初回の外来までに行なうことを原則とし、判定結果が出るまで MPA およびメトホルミンの投与を継続する。</li> <li>効果判定は掻爬術施行から 5 週まで（+1 週）を許容するが、32 週時点の効果判定〔寛解判定〕は 4 週以内に行うこととする。</li> <li>32 週時に CR が得られた症例を寛解とし、第Ⅱ期の治療に移行する。</li> <li>32 週時に CR が得られない症例は非寛解として治験中止とする。</li> </ul> <p>■ 第Ⅱ期</p> <ul style="list-style-type: none"> <li>第Ⅰ期 36 週来院時に寛解判定が得られた症例では、MPA の投与を終了し、メトホルミンのみ投与を継続する。</li> <li>最大投与量を 750mg とし、<b>6.7 減量・休薬基準</b>に従い適切に減量、休薬を行なう。</li> <li>妊娠を希望しない症例は、原則治験完了まで月経コントロールを施行する（<b>6.11 併用薬・併用療法</b> 参照）。</li> <li>挙児希望症例に対しては直ちに妊娠を許可する。ただし一定期間月経コントロールを行うかどうかは施設ごとの判断で行う。</li> <li>挙児希望症例はなるべく不妊治療を行い、短期間での妊娠をめざす。</li> </ul> <p>【メトホルミン 1500mg 群：C 群】</p> <p>■ 第Ⅰ期</p> <ul style="list-style-type: none"> <li>MPA は、1 日 600mg を 36 週来院時（寛解判定日）まで投与する。</li> <li>MPA は治験薬（メトホルミン）と同時に服用開始する。</li> <li>MPA 服用中は血栓予防を目的として低用量アスピリンの併用を許容する。</li> </ul> <p><u>治験薬の投与</u></p> <ul style="list-style-type: none"> <li>治験薬（メトホルミン）は初回処方日（0 週 Day-1）の翌日から服用開始する。初回処方日の翌日を治療期の開始日（Day1）と定義する。0 週 Day-1 の来院は、原則として登録後 14 日以内とする。</li> <li>メトホルミンの初回投与は 500mg（250mg×2、分 2）とする。</li> <li>メトホルミン開始 4 週後に、<b>6.7.3 増量基準</b>に従い、4 週毎に 1500mg まで漸増する。増量は 500mg（250mg×2、分 2）→750mg（250mg×3、分 3）→1500mg（250mg×6、分 3）とする。</li> <li>以後、<b>6.7 減量・休薬基準</b>に従い、適切に減量、休薬を行なう。ただ</li> </ul> |
|--|--------------------------------------------------------------------------------------------------------------------------------------------------------------------------------------------------------------------------------------------------------------------------------------------------------------------------------------------------------------------------------------------------------------------------------------------------------------------------------------------------------------------------------------------------------------------------------------------------------------------------------------------------------------------------------------------------------------------------------------------------------------------------------------------------------------------------------------------------------------------------------------------------------------------------------------------------------------------------------------------------------------------------------------------------------------------------------------------------------------------------------------------------------------------------------------------------------------------------------------------------------------------------------------------|

1  
2  
3  
4  
5  
6  
7  
8  
9  
10  
11  
12  
13  
14  
15  
16  
17  
18  
19  
20  
21  
22  
23  
24  
25  
26  
27  
28  
29  
30  
31  
32  
33  
34  
35  
36  
37  
38  
39  
40  
41  
42  
43  
44  
45  
46  
47  
48  
49  
50  
51  
52  
53  
54  
55  
56  
57  
58  
59  
60

|            |                                                                                                                                                                                                                                                                                                                                                                                                                                                                                                                                                                                                                                                                                                                                                                                                                                                     |
|------------|-----------------------------------------------------------------------------------------------------------------------------------------------------------------------------------------------------------------------------------------------------------------------------------------------------------------------------------------------------------------------------------------------------------------------------------------------------------------------------------------------------------------------------------------------------------------------------------------------------------------------------------------------------------------------------------------------------------------------------------------------------------------------------------------------------------------------------------------------------|
|            | <p>し、最大投与量を 1500mg とする。</p> <ul style="list-style-type: none"><li>全面搔爬術施行時は、当日のメトホルミン服用は中断する。</li></ul> <p><u>経過観察と効果判定</u></p> <ul style="list-style-type: none"><li>第Ⅰ期は 4 週毎に外来経過観察を行う。</li><li>8 週毎に麻酔下全面搔爬術による子宮内膜組織診を施行し、効果判定を行なう。</li><li>効果判定は搔爬術施行後初回の外来までに行なうことを原則とし、判定結果が出るまで MPA 及びメトホルミンの投与を継続する。</li><li>効果判定は搔爬術施行から 5 週まで（+1 週）を許容するが、32 週時点の効果判定（寛解判定）は 4 週以内に行うこととする。</li><li>32 週時に CR が得られた症例を寛解とし、第Ⅱ期の治療に移行する。</li><li>32 週時に CR が得られない症例は非寛解として治験中止とする。</li></ul> <p>■ 第Ⅱ期</p> <ul style="list-style-type: none"><li>第Ⅰ期 36 週来院時に寛解判定が得られた症例では、MPA の投与を終了し、メトホルミンのみ投与を継続する。</li><li>最大投与量を 1500mg とし、<b>6.7 減量・休薬基準</b>に従い適切に減量、休薬を行なう。</li><li>妊娠を希望しない症例は、原則治験完了まで月経コントロールを施行する（<b>6.11 併用薬・併用療法</b> 参照）。</li><li>挙児希望症例に対しては直ちに妊娠を許可する。ただし一定期間月経コントロールを行うかどうかは施設ごとの判断で行う。</li><li>挙児希望症例はなるべく不妊治療を行い、短期間で妊娠をめざす。</li></ul> |
| 追加治療       | プロトコル治療不応例は中止基準に従い治験中止とする。中止後の治療は規定しない。                                                                                                                                                                                                                                                                                                                                                                                                                                                                                                                                                                                                                                                                                                                                                                                                             |
| 目標被験者数     | 120 例 （各群 40 例）                                                                                                                                                                                                                                                                                                                                                                                                                                                                                                                                                                                                                                                                                                                                                                                                                                     |
| 治験実施期間     | 治験実施期間： 5.5 年 （2019 年 7 月 1 日～2024 年 12 月 31 日）<br>症例登録期間： 2.5 年 （2019 年 7 月 1 日～2021 年 12 月 31 日）                                                                                                                                                                                                                                                                                                                                                                                                                                                                                                                                                                                                                                                                                                                                                  |
| 治験施設数      | 15 施設                                                                                                                                                                                                                                                                                                                                                                                                                                                                                                                                                                                                                                                                                                                                                                                                                                               |
| 倫理指針及び GCP | 本治験の実施に際しては省令 GCP、「ヘルシンキ宣言」（2013 年改訂）に基づく倫理的原則、及びその他の関連する規制要件に従う。                                                                                                                                                                                                                                                                                                                                                                                                                                                                                                                                                                                                                                                                                                                                                                                   |

|                |                                                                                                                                                                                                                   |
|----------------|-------------------------------------------------------------------------------------------------------------------------------------------------------------------------------------------------------------------|
| <b>治験審査委員会</b> | 本治験の実施に先立ち、実施医療機関の治験審査委員会は、本治験の倫理的、科学的及び医学的妥当性を審査する。本治験は、治験審査委員会の承認を得た後に実施する。治験審査委員会の審議結果が「修正の上で承認する」であった場合には、審議結果に基づいて実施計画書又は症例報告書、同意説明文書等を修正した後、本治験を実施する。また、治験審査委員会は少なくとも1年に1回以上の頻度で本治験が適切に実施されているか否かを継続的に審査する。 |
|----------------|-------------------------------------------------------------------------------------------------------------------------------------------------------------------------------------------------------------------|

## 1. 治験の背景

### 1.1. 対象疾患

脂肪の過剰摂取など食事の欧米化・晩婚化・出産回数の低下などライフスタイルの変化に伴い、わが国における子宮体癌発生頻度は年々増加している。日本産科婦人科腫瘍委員会の子宮体癌 I-IV 期の登録数は、1994 年の 2,115 例から 2015 年には 10,119 例に急増している。40 歳未満の患者数も、それぞれ 109 例から 471 例と上昇しており、妊孕性温存が必要な年齢での子宮体癌数が増加傾向にある<sup>1</sup>。

Body Mass Index (BMI) の上昇に伴って様々な種類のがんが増加する。Renehan らのメタ解析によれば、子宮体癌は、これらのがんのうちでも最も肥満 (BMI の上昇) と関連した固形がんとされる<sup>2</sup>。BMI が 25 以上の女性は、25 未満の女性と比較して子宮体癌のリスクが 2-4 倍高い<sup>3</sup>。また、糖尿病患者は、非糖尿病女性にくらべ発癌リスクが高く、子宮体癌の発症リスクも 2 倍高いとされている<sup>4</sup>。さらに、ケースコントロール研究では、インスリン高値・C ペプチド高値・Insulin-like Growth Factor Binding Protein-1 (IGFBP-1) の低下が子宮体癌発症リスクであることが示されている<sup>5,6</sup>。インスリンは、糖代謝 (肝臓でのグリコーゲン合成・骨格筋でのグルコース取り込み促進など) を調節しているが、高値の場合にはインスリンレセプターや Insulin-like growth factors-1 (IGF-1) レセプターを介して、1) Phosphoinositide 3-kinase/Akt (PI3K/PI3K/AKT) 経路・Mitogen-Activated Protein kinase (MAPK) 経路を活性化、2) IGFBP-1 の発現を抑制して free IGF-1 を増加することにより細胞増殖を刺激する<sup>7</sup>。さらに、インスリン抵抗性の増大にともなって増加する IGF-1・レプチンはさらに細胞増殖を刺激する<sup>8</sup>。これらの知見から、肥満・インスリン抵抗性・糖尿病は子宮体癌のリスク因子と考えられている。

子宮体癌のなかでも、妊孕性温存治療の対象となる 40 歳以下の若年性子宮体癌・子宮内膜異型増殖症の症例は、多嚢胞卵巣症候群 (Polycystic ovary syndrome : PCOS) ・肥満・インスリン抵抗性・糖尿病や耐糖能異常を有する頻度が高いことが報告されている<sup>9,10</sup>。また、子宮体癌患者の予後は、癌による死亡より、心筋梗塞や糖尿病など合併症による死亡のほうが高頻度とされる。このような背景から、糖尿病やインスリン抵抗性・高インスリン血症の治療が、予後改善に直結すると考えられている。

子宮内膜異型増殖症は、類内膜癌の前癌状態と考えられている組織所見で、両者は混在することが多い。試験的な生検で子宮内膜異型増殖症と診断され子宮摘出した症例では、40%以上の症例で子宮体癌が存在したと報告されている<sup>11</sup>。子宮内膜異型増殖症は前癌病変の性格を有するこ

とや高分化型類内膜癌の合併が多く、浸潤のない高分化型類内膜癌と同じような治療が行われている。

## 1.2. 妊孕性温存療法における標準治療

子宮体癌の標準治療は手術療法であるが、妊孕性温存を目的として行うプロゲスチン療法は、日本婦人科腫瘍学会の子宮体癌治療ガイドラインでは、推奨グレードCで考慮されている。ただし、温存治療の適応は、子宮内膜異型増殖症、及び子宮体癌のうち高分化型類内膜癌で超音波検査やMRI検査などで筋層浸潤の疑いがないと診断され、CTでリンパ節転移や遠隔転移の疑いのないIA期相当に限定されている<sup>12</sup>。

プロゲスチン投与による温存療法は、メタ解析によると奏効率は子宮体癌76%・子宮内膜異型増殖症86%で比較的高い(表1)<sup>13,14</sup>。プロゲスチン療法は、妊孕性温存希望例に対する標準治療と考えられるようになってきたが、一旦奏効した後の再発率が高いことが問題となっている。メタ解析によると、プロゲスチン療法で病変消失した症例のうち子宮内膜異型増殖症の26%、子宮体癌の41%に再発を認める。再発は1-3年で認め、再発までの中央値は24か月(4-72か月)と報告され、長期寛解を維持できる症例はおおよそ45%にすぎない<sup>13,14</sup>。わが国で行われた多施設共同第2相試験の報告では、子宮体癌の57%、子宮内膜異型増殖症の38%が再発し、再発までの期間中央値が34.6ヶ月とされ、約3年の経過観察で最終的に16例(73%)が子宮摘除をうけている<sup>15</sup>。

若年者に対する子宮温存治療は、少数例の報告が多く、プロゲスチンの投与方法や投与量は確立していない。温存治療に対し、わが国で選択できる薬剤は、MPA(ヒスロンH®)のみである。MPAの投与量は、報告により200-600mg/日と幅があるが(表2)、わが国では、多施設共同前向き試験の結果から600mg/日が一般的となっている。効果判定は、投与後6か月で行うことが多いが、9-12か月の長期投与で奏効する例も多く、6か月で完全消失(CR)に至らない場合でも、細胞効果を認める場合には、投与期間の延長が考慮される。

表 1 プロゲステロンを用いた妊孕性温存療法（レビュー及び多数例の報告）

|                                        |                   | 総症例数 | 奏効例(%)     | 再発例(%)    | 妊娠例(%)    |
|----------------------------------------|-------------------|------|------------|-----------|-----------|
| 子宮体癌                                   |                   |      |            |           |           |
| Gallos, et al. (2012) <sup>13</sup>    | Meta-analysis     | 408  | 301 (76.2) | 89 (40.6) | 75 (28)   |
| Gunderson, et al. (2012) <sup>14</sup> | Systematic review | 281  | 209 (74.6) | 74 (35.4) | 89 (34.8) |
| Ushijima, et al. (2012) <sup>15</sup>  | Phase 2           | 22   | 14 (63.6)  | 8 (57.1)  |           |
| 子宮内膜異型増殖症                              |                   |      |            |           |           |
| Gallos, et al. (2012) <sup>13</sup>    | Meta-analysis     | 151  | 127 (85.6) | 27 (26)   | 31 (26.3) |
| Gunderson, et al. (2012) <sup>14</sup> | Systematic review | 111  | 95 (86)    | 22 (23.1) | 28 (41)   |
| Ushijima, et al. (2007) <sup>15</sup>  | Phase 2           | 17   | 16 (94.1)  | 6 (37.5)  |           |

表 2 わが国における子宮体癌に対する MPA 療法

|                                       | 症例数 | 投与量<br>(mg/day) | 投与期間  | 奏効率(%)  | 再発数(%) |
|---------------------------------------|-----|-----------------|-------|---------|--------|
| Kaku, et al (2001) <sup>16</sup>      | 12  | 200-600         | 2-14M | 9(75)   | 2(22)  |
| Ota, et al (2005) <sup>17</sup>       | 12  | 600             | 3-12M | 5(42)   | 2(40)  |
| Niwa, et al (2005) <sup>18</sup>      | 12  | 400-600         | 6-10M | 12(100) | 8(67)  |
| Yahata, et al (2006) <sup>19</sup>    | 8   | 600             | 3-14M | 7(88)   | 7(100) |
| Minaguchi, et al (2007) <sup>20</sup> | 19  | 400-600         | 2-8M  | 15(79)  | 5(33)  |
| Ushijima, et al (2007) <sup>15</sup>  | 22  | 600             | 26W   | 14(64)  | 8(57)  |
| Yamazawa, et al (2007) <sup>21</sup>  | 9   | 400             | 6M    | 7(78)   | 2(25)  |
| Fujiwara, et al (2012) <sup>22</sup>  | 59  | 400-600         | 4-6M  | 42(71)  | 22(52) |

1.3. 治験薬について

メトホルミンは、肝臓・筋でインスリン抵抗性改善により、血糖・インスリン値下降作用を有する糖尿病治療薬で、糖尿病の予防効果も認めている<sup>23</sup>。作用機序はミトコンドリア呼吸鎖の抑制<sup>23</sup>、インスリン受容体チロシンキナーゼ活性の増強<sup>24</sup>、Glucose transporter type 4（GLUT4 トランスポーター）の細胞膜への移動の刺激<sup>25</sup>、細胞内成分を除去した卵母細胞におけるグリコーゲン合成酵素の刺激<sup>26</sup>、AMP 活性化プロテインキナーゼ(AMPK)の活性化<sup>27</sup>と考えられている。糖尿病患者への服用後の筋生検で、AMPK の活性化が報告され、in vivo でも効果が確認されている。

2005 年に Evans らが、メトホルミン服用中の糖尿病患者は、非服用者に比較し癌の発生が少なくいと報告して以来<sup>28</sup>、現在まで多数のコホート研究、ケースコントロール研究でメトホルミンの発癌予防効果が報告された。

メトホルミンは、乳癌・大腸癌・前立腺癌・卵巣癌・子宮体癌などの培養細胞株を用いた *in vitro* の実験でも、AMPK の活性化を介した Mammalian Target of Rapamycin (mTOR) の抑制や、MAPK の抑制を介した cyclin D1 の発現低下・p27 発現増加・pRB 抑制を認め、G1 停止から細胞増殖を抑制すると報告された<sup>29,30</sup>。臨床的には、糖尿病患者でメトホルミン服用者は、非服用者と比較し、乳癌の術前化学療法の奏効率が高いとの報告があり、抗がん剤との併用効果も期待されている<sup>31</sup>。また、メトホルミン服用により大腸ポリープの発生が抑制されたとの報告もある。

また、子宮体癌患者の術前に、糖尿病治療量のメトホルミンを投与したところ、術前後で癌組織中の Ki67 の発現の低下や MAPK、mTOR の抑制が認められ、*in vivo* での効果が確認された<sup>32</sup>。メトホルミン服用中の糖尿病患者は、非服用者に比較し子宮体癌の発生も少なく、予後も良好との疫学報告もされ<sup>33</sup>、子宮体癌の発癌、再発予防に効果が期待される。

また、わが国では保険適応はないが、海外では PCOS 症例の排卵誘発の第一選択となっている薬剤である<sup>34</sup>。PCOS は、肥満・インスリン抵抗性を有し、不妊以外に糖尿病・子宮体癌のリスクとなる病態である。メトホルミンによるインスリン抵抗性改善が、排卵率の上昇と同時に糖尿病や子宮体癌の予防になる可能性が考えられる。本治験の対象者は PCOS 症例も多く、メトホルミンに排卵誘発効果や妊娠率の改善効果も期待される。

メトホルミン（メトグルコ錠 250mg，グリコラン錠 250mg）の保険適応は糖尿病のみで、メトグルコ錠 250mg は最大 2250mg/日まで承認されている。一方、本治験で使用するグリコラン錠 250mg は、750mg/日まで承認されている。また、メトホルミンは保険適応外だが排卵誘発剤として臨床使用されている。

#### 1.4. 治験薬の対象疾患に対する治療効果・試験成績

治験調整医師らは、MPA にビグアナイド系糖尿病治療薬であるメトホルミンを併用・継続した前向き試験（第 II 相試験）を 2008 年 7 月～2014 年 12 月に実施した（UMIN 000002210）<sup>35</sup>。子宮内膜異型増殖症 17 例、子宮体癌 19 例に対し、MPA を 400mg/日を 6-9 か月投与した。病理学的完全奏効（pathological Complete Response: pCR）を病変消失（寛解）と定義し、pCR を確認したうえで MPA 治療期を終了した。メトホルミン併用は 750mg/日から開始し、750mg（1 ヶ月間）→1500mg（1 ヶ月間）→2250mg まで増量し継続維持。メトホルミンは妊娠が確認されるまで MPA 治療期終了後も継続投与した（維持療法期）。

寛解後 6 か月間は低用量ピルもしくは低用量黄体ホルモンで月経コントロールを行い、再発が無いことを確認し妊娠を許可した。妊娠希望の無い場合は月経コントロールを継続した。子宮内膜異型増殖症 17 例、子宮体癌 19 例が登録され、治療を終了した 36 例中 29 例（81%）が寛解した。寛解した 29 例のうち再発は 3 例（10%）に認めた（観察期間の中央値 38 か月（9 -66 か月））。組織型別にみると、子宮内膜異型増殖症は 17 例中 16 例寛解し再発は認めず、子宮体癌は 19 例中 13 例寛解、3 例再発している。千葉大学医学部附属病院で施行した MPA 単独療法をヒストリカルコントロールとして比較し、有意に再発率が低下していた。メトホルミン併用・継続により、治療開始時と比較してインスリン抵抗性を有意に改善した。登録例 36 例中 grade1-2 の下痢を 4 例 11%、grade 1-2 の悪心を 6 例 17%、grade 1 の肝機能異常を 3 例（8%）に認めた。grade 3 以上の有害事象や血栓症は 1 例も認めなかった。MPA 服用中に体重増加を認めることが多いが、メトホルミン併用により、grade 1 以上の体重増加は認めなかった。

若年性子宮体癌患者は肥満・インスリン抵抗性を有し、PCOS を背景にすることも多いため、メトホルミンは利にかなった薬剤と考えられる。

## 2. 治験の目的と必要性

### 2.1. 治験の目的と意義

本治験は、妊孕性温存を希望する子宮内膜異型増殖症及び IA 期子宮体癌に対し、MPA にメトホルミンを併用する新規治療法でのメトホルミンの適切な用量を検討することを主目的とする。MPA にメトホルミンを併用する治療法の有効性を、3 年無再発生存割合により評価する。有効性に加え、メトホルミン併用の安全性を有害事象発生割合で評価し、子宮体癌に対する最も適切な用量を決定する。

本治験によりメトホルミンの適切な用量が明らかになり、長期使用時の臨床的有用性が示されれば、より有効な標準治療が確立される。妊孕性温存療法の治療成績の改善は、妊娠を望む子宮体癌患者にとってのベネフィットは非常に大きい。子宮体癌に対するメトホルミンの治験は海外を含めこれまでに実施例がなく、本治験が世界に示す学術的なインパクトも大きい。さらに、少子高齢化が加速するわが国において、妊孕性温存療法の新たな治療法を確立することは、社会的な意義があると考えられる。

**【目的の設定根拠】**

治験調整医師が実施した第Ⅱ相臨床試験では、メトホルミン併用療法は標準的な治療法であるプロゲステロン療法と比較し十分に優れた結果を得た。メトホルミンの用量は最大 2250mg まで許容されたが、有害事象により減量した症例も存在したため、1500mg 以下での使用が適切と示唆された。しかし、750mg と 1500mg で有効性に差異があるかは明らかでなく、適切な用量は不明である。

以上より、本治験では、対照集団に対するメトホルミンの適切な用量を決定することが臨床上最も意義のある目的と判断した。

**2.2. 本治験参加により予想される利益**

メトホルミンは、肥満・インスリン抵抗性・耐糖能異常を有し糖尿病のリスクが高い症例に対し、糖尿病の予防効果が証明されている。また、メトホルミンは、PCOS における排卵誘発効果が証明されており、妊娠率改善効果が期待できる。また、メトホルミン併用により MPA 投与時の体重増加が抑制できる可能性がある。

治験参加者の治験期間中メトホルミンは無償で提供されるが、メトホルミンを除く薬剤費を含む診療費は、すべて患者の保険及び自費により負担される。患者が本治験に参加することで得られる特別な費用上の利益は、治験参加による負担軽減費以外にはない。

**2.3. 本治験参加により予想される不利益**

メトホルミンは、副作用が少ない薬剤だが、下痢・悪心などの消化器症状のほか、まれに乳酸アシドーシスなど重大な副作用の報告がある。メトホルミン服用による有害事象の発生が、治験に参加して生じるリスク・不利益である。

### 3. 本治験で用いる基準・定義

#### 3.1. 病期分類

病期分類は FIGO 国際進行期分類（2008 年）を用いる。

#### 3.2. 効果判定

「10.1. 効果判定とエンドポイントの定義」と同様とする。

- (1) CR：病理学的に子宮内膜異型増殖症・子宮体癌の消失を認めた場合。（病変が消失し、子宮内膜全面搔爬で組織が採取できず、細胞診異常も認めない場合は臨床的に CR と判断する。）
- (2) PR：子宮内膜異型増殖症・子宮体癌は残存しているが、治療に伴う腫瘍腺管の変性がうかがわれ、間質の脱落膜化変化などホルモン効果がある場合。判定困難な異型腺管の残存も PR と判断する。異型のない子宮内膜増殖症の存在は PR と判断する。
- (3) SD：間質の脱落膜化変化などホルモン効果を認めず、治療に伴う腫瘍腺管の変性もうかがわれないもの。
- (4) PD：脱分化など、悪性度の上昇が認められた場合。筋層浸潤・転移を疑う場合。なお、登録時の組織が子宮内膜異型増殖症で、経過中に高分化型類内膜癌と判断されても悪性度の上昇とは判断しない。

#### 3.3. 有害事象評価

有害事象評価には、NCI-CTCAE（Common Terminology Criteria for Adverse Events）v4.0 日本語訳 JCOG/JSCO 版を用いる。

#### 3.4. Performance Status (PS)

PS は ECOG の基準を用いる。

0：全く問題なく活動できる。発病前と同じ日常生活が制限なく行える。

1：肉体的に激しい活動は制限されるが、歩行可能で、軽作業や座っての作業は行うことができる。例：軽い家事、事務作業

2：歩行可能で自分の身の回りのことはすべて可能だが作業はできない。日中の 50%以上はベッド外で過ごす。

3：限られた自分の身の回りのことしかできない。日中の 50%以上をベッドか椅子で過ごす。

4：全く動けない。自分の身の回りのことは全くできない。完全にベッドか椅子で過ごす。

### 3.5. 子宮内膜精密検査

第Ⅱ期の規定来院時に実施する子宮内膜検査（試験掻爬術、吸引組織検査、セルブロックを用いた簡易組織診、細胞診）において、組織診で異常または細胞診で疑陽性以上の場合、4 週以内に実施する検査。例として、麻酔下の全面掻爬術や子宮鏡を用いた内膜検査が挙げられる。

## 4. 対象患者

### 4.1. 選択基準

- (1) 文書同意取得前 24 週（168 日）から登録前までに行った子宮内膜検査において、組織学的に子宮内膜異型増殖症もしくは高分化型類内膜癌の確定診断が得られている患者で、麻酔下の子宮内膜全面掻爬術により他の組織型癌が否定されている患者とする。子宮体癌症例は、文書同意取得前 8 週（56 日）から登録前までに行った CT・MRI・超音波検査で筋層浸潤・リンパ節転移・遠隔転移を認めない患者。
- (2) 子宮内膜異型増殖症もしくは高分化型類内膜癌に対する前治療歴（高用量黄体ホルモン療法、ミレーナ、化学療法）のない患者。月経調整目的のホルモン剤、低用量ピルの使用歴は可。
- (3) 同意取得時の年齢が、20 歳以上、42 歳以下である患者。
- (4) Performance status（PS）は ECOG の基準で 0 である患者。
- (5) 文書同意取得後、登録前 28 日以内の臨床検査値が、以下のすべてを満たす患者。
  - ① 白血球数 3,000/mm<sup>3</sup> 以上
  - ② 血小板数 10 X 10<sup>4</sup>/mm<sup>3</sup> 以上
  - ③ AST（GOT）施設基準値上限の 2 倍以下
  - ④ ALT（GPT）施設基準値上限の 2 倍以下
  - ⑤ 血清クレアチニン 1.0mg/dl 以下
  - ⑥ クレアチニンクリアランス（eGFR 可） 60mL/min 以上

- ⑦ 総ビリルビン 1.5mg/dl 以下
- ⑧ D-ダイマー 1.5μg/ml 以下
- (6) 本治験使用薬剤（MPA、メトホルミン）に対し過敏症の既往歴のない患者。
- (7) 文書同意取得後、登録前 28 日以内の心電図検査において臨床上問題となる異常所見が認められない患者。
- (8) 本治験参加について十分な説明を受けた後、十分な理解の上、患者本人から文書で同意が得られた患者。

**【設定根拠】**

- (1)～(3)：本治験の評価対象を適切に選択するため、妊孕性温存療法が適応となる対象とした。
- (4)～(7)：被験者の安全性を考慮して設定した。
- (8)：ヘルシンキ宣言の倫理的原則及び医薬品の臨床試験の実施基準（GCP）を遵守して治験を実施するため設定した。

**4.2. 除外基準**

- (1) 本治験使用薬剤（メトホルミン，MPA）に対し禁忌の患者。
  - ① 乳酸アシドーシスを起こしやすい患者。  
(乳酸アシドーシスの既往がある/中等度以上の腎機能障害/透析患者/重度の肝機能障害/ショック、心不全、心筋梗塞、肺塞栓等心血管系、肺機能に高度の障害のある患者及びその他の低酸素血症を伴いやすい状態/過度のアルコール摂取者/脱水者、脱水状態が懸念される下痢、嘔吐等の胃腸障害のある患者)
  - ② 重症ケトーシス、糖尿病性昏睡または前昏睡、I型糖尿病患者。
  - ③ 重症感染症、手術前後、重篤な外傷のある患者。
  - ④ 栄養不良状態、飢餓状態、衰弱状態、脳下垂体機能不全または副腎機能不全の患者。
  - ⑤ 妊婦または妊娠している可能性のある婦人。
  - ⑥ 治験薬（メトホルミン）の成分又はビグアナイド系薬剤に対し過敏症の既往歴のある患者。
  - ⑦ 血栓症を起こすおそれの高い患者。  
(手術後 1 週間以内の患者/脳梗塞、心筋梗塞、血栓静脈炎等の血栓性疾患又はその

既往歴のある患者/動脈硬化症の患者/心臓弁膜症、心房細動、心内膜炎、重篤な心不全の心疾患のある患者/ホルモン剤を投与されている患者)

- ⑧ 診断未確定の性器出血、尿路出血、乳房病変のある患者。
  - ⑨ 重篤な肝障害のある患者。
  - ⑩ 高カルシウム血症の患者。
- (2) 精神病または精神症状を合併しており、治験への参加が困難と判断される患者。
- (3) コントロール不良の糖尿病患者。
- (4) メトホルミンを含むビグアナイド系糖尿病治療薬を服用している糖尿病患者（食事・運動療法、ビグアナイド系以外の内服治療症例は可。）。
- (5) 活動性の重複癌を有する患者。
- (6) ステロイド剤の継続的な全身投与（内服または静脈内）をうけている患者。
- (7) その他、主治医が不適格と判断した患者。

#### 【設定根拠】

- (1)：薬剤の添付文書を参考に被験者の安全性を確保するために設定した。
- (2)～(7)：治験の評価に影響を与えられとされるため設定した。

## 5. 被験者の同意

### 5.1. 同意文書及びその他の説明文書の作成並びに改訂

治験責任医師は、被験者から治験参加の同意を得るために用いる同意文書及びその他の説明文書を可能な限り平易な表現で作成する。また、同意文書及びその他の説明文書を改訂する必要があると認めた場合は、これらを改訂する。

治験責任医師は、作成又は改訂された同意文書及びその他の説明文書を治験審査委員会に提出し、その承認を得る。

### 5.2. 同意取得の時期と方法

#### 1) 同意の取得

治験責任医師又は治験分担医師は、同意文書及びその他の説明文書を被験者に手渡し、

**5.3. 被験者に対する説明事項** に示す内容について十分な説明を行う。また、必要な場合には、治験協力者も被験者に補足的な説明を行う。被験者が治験の内容を良く理解したことを確認した上で、治験開始前（スクリーニング）検査を実施するまでに、自由意思に基づいた文書による同意を取得する。

**2) 同意書への記入方法及び説明文書の交付**

被験者の同意に際しては、説明を行った治験責任医師又は治験分担医師が記名捺印又は署名し、説明した日付を記入する。被験者は同意書に署名し、同意した日付を記入する。なお、治験協力者が補足的な説明を行った場合は、当該治験協力者も記名捺印又は署名し、説明した日付を記入する。同意を得た後、説明文書及び同意書の写しを被験者に交付する。

**説明文書改訂時**

治験責任医師又は治験分担医師は、被験者の同意に関連し得る新たな情報を得た場合、当該情報を速やかに被験者に伝え、治験に継続して参加するか否かについての意思を確認し、記録する。同意文書及びその他の説明文書を改訂した場合、被験者に対して改訂された同意文書及びその他の説明文書を用いて改めて説明し、治験への参加継続について文書で同意を取得する。

**5.3. 被験者に対する説明事項**

治験責任医師が作成する説明文書には、以下の事項を記載する。

- 1) 当該治験が研究を伴うこと
- 2) 治験の目的
- 3) 治験責任医師又は治験分担医師の氏名、職名及び連絡先
- 4) 治験の方法（治験の治験的側面、被験者の選択基準及び各投与群に割付けられる確率を含む）
- 5) 予期される臨床上の利益及び危険性又は不便
- 6) 被験者に対する他の治療方法の有無及びその治療方法に関して予測される重要な利益及び危険性
- 7) 被験者の治験への参加予定期間
- 8) 治験への参加は被験者の自由意思によるものであり、被験者は治験への参加を随時拒否又は撤回することができること。また、拒否・撤回によって被験者が不利な扱いを受けること、

- 治験に参加しない場合にうけるべき利益を失うことはないこと
- 9) モニター、監査担当者、治験審査委員会及び規制当局が医療に係る原資料を閲覧できること。  
その際、被験者の秘密は保全されること。また、同意文書に被験者が署名することによって  
閲覧を認めたことになること
  - 10) 治験の結果が公表される場合であっても、被験者の秘密は保全されること
  - 11) 被験者が治験及び被験者の権利に関してさらに情報がほしい場合又は臨床に関連する健康被害が生じた場合に照会すべき又は連絡をとるべき医療機関の相談窓口
  - 12) 治験に関連する健康被害が発生した場合に被験者が受けることのできる補償及び治療
  - 13) 治験に参加する予定の被験者数
  - 14) 治験への参加の継続について被験者の意思に影響を与える可能性のある情報が得られた場合には速やかに被験者に伝えること
  - 15) 治験への参加を中止させる場合の条件又は理由
  - 16) 被験者が費用負担する必要がある場合にはその内容
  - 17) 被験者に金銭等が支払われる場合にはその内容（支払額算定の取り決め等）
  - 18) 被験者が守るべき事項
  - 19) 当該治験の適否等について調査審議を行う治験審査委員会の種類、各治験審査委員会において調査審議を行う事項その他当該治験に係る治験審査委員会に関する事項

## 6. 治験の方法

### 6.1. 治験のデザイン

本治験は多施設共同、3用量群、オープン、ランダム化比較試験である。

#### 【治験デザインの設定根拠】

本治験のデザインは、メトホルミンを3用量群で比較するオープン試験とした。オープン試験とした理由は、治験薬投与により生じ得る有害事象に対し適切な措置を講じることができるようにするためである。

本治験の対象となる妊孕性温存療法適応の患者の発生頻度は年間約500例程度であることから、効率的に症例をリクルートするため、全国から経験豊富な施設を選定し、多施設共同試験として実施することとした。

対象患者に対する唯一の標準治療薬として、MPA が承認されている。MPA の投与期間は施設ごとに判断されるが、ガイドライン上 6 ヶ月の投与が一般的で、その後 1 年までの延長は許容されている。そのため、本治験における MPA 投与期間は 32 週（約 8 か月）とした。

メトホルミンの用量は、750mg（低用量）及び 1,500mg（高用量）と設定した。設定根拠は、次の通りである。本治験に先立って実施した単施設第 II 相臨床研究において、メトホルミン投与量を 2,250mg まで漸増したところ有害事象により減量を余儀なくされた症例が存在したことから、安全性を考慮して本治験における最大用量を 1,500mg とした。また、750mg 長期投与時の有効性に関するデータはなく、本治験において検討するため 750mg 投与群を設定した。

6.2. 治験のアウトライン

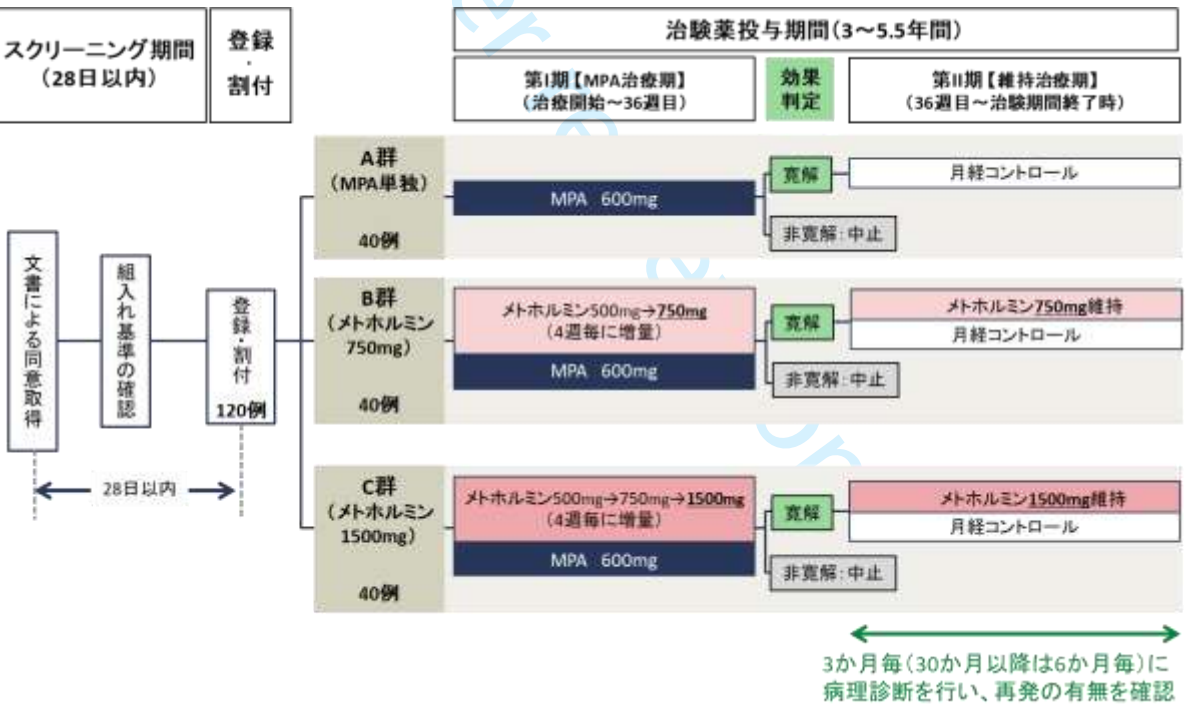

6.3. 目標被験者数と治験実施期間

目標被験者数：120 例（各群 40 例）

治験実施期間： 5.5 年（2019 年 7 月 1 日 - 2024 年 12 月 31 日）

症例登録期間： 2.5 年（2019 年 7 月 1 日 - 2021 年 12 月 31 日）

目標症例数は、「11.2. 目標症例数と設定根拠」を参照。

## 6.4. 施設登録及び症例登録・割付方法

施設登録及び症例登録は、千葉大学医学部附属病院 臨床試験部 データマネジメント室における中央登録制とする。施設登録が完了した施設から症例登録が可能となる。施設登録は FAX、症例登録は Web により、以下の手順で行う。

### 6.4.1. 施設登録

- 1) 各参加施設の治験責任医師は、当該施設の治験審査委員会等での承認が得られた後、治験審査委員会等の承認通知書の写し及び施設登録依頼書を施設登録センターに FAX により送付する。
- 2) 施設登録センターは施設登録を行い、施設登録完了通知書を治験責任医師に送付する。

FELICIA Trial 施設登録センター（千葉大学医学部附属病院 臨床試験部 DM 室）

受付 FAX 番号：043-222-1207

問合せ電話番号：043-222-1206

※受付時間は月～金の 9:00～17:00（土日、祝日、年末年始を除く。）

受付時間外に FAX を受信した場合は、翌稼働日の受付とする。

### 6.4.2. 症例登録・割付

- 1) 文書同意取得：治験責任医師または治験分担医師は、妊孕性温存療法を希望する子宮内膜異型増殖症・子宮体癌患者に対し、本治験の対象として該当する可能性がある場合に文書による同意を取得する。
- 2) 適格性の確認：治験責任医師または治験分担医師は、患者から同意を取得した後、登録前のスクリーニング検査を施行する。選択基準に合致していること及び除外基準に抵触しないか確認する。
- 3) 登録・割付：治験責任医師または治験分担医師は対象患者が選択基準をすべて満たし、除外基準のいずれにも該当しないことを確認した後、治験責任医師または治験分担医師、治験協力者は下記の Web サイトにアクセスし、症例登録のページに必要な情報を入力し、

症例登録を行う。詳細は別途作成する被験者症例登録入力マニュアルを参照する。なお、  
症例登録は同意取得後 28 日以内に行う。症例登録に必要な情報を入力後、割付を行う。  
割付結果は、症例登録 Web 画面に表示される。治験責任医師または治験分担医師は、割  
付結果に従いプロトコル治療を開始する。  
一度登録された患者は登録取り消し（データベースから抹消）はなされない。重複登録  
の場合は、いかなる場合も初回の登録情報（登録番号）・割付群を採用する。治験責任医  
師または治験分担医師は誤登録・重複登録が判明した際には速やかに症例登録センター  
に連絡する。

※ 治験責任医師又は治験分担医師は、被験者の登録・割付がなされるまで治験薬を処方・  
投与してはならない。

FELICIA Trial 症例登録 Web サイト（DATATRAK ONE）

URL : <https://secure.datatrak.net>

問合せ電話番号 : 043-222-1206

※ 土日祝を含む 365 日、24 時間受付可能（保守点検等によるシステム停止時間を除く。）

6.4.3. 割付調整因子

割付調整因子は、組織型（子宮内膜異型増殖症、子宮体癌）、BMI（25 以上、25 未満）、婚姻  
状態（既婚、未婚）とする。組織型は各施設で判断する。  
なお、治験薬への割付は、動的割付とする。

6.4.4. 登録例の中央病理診断

中央病理診断は、別途作成する手順書に従い施行する。中央病理診断の対象となる標本は、  
MPA 治療期（第 I 期の登録時、8 週、16 週、24 週、32 週）、再発が疑われた際に実施された病  
理検査の標本、及び第 II 期の 120 週（3 年無再発生存確認時）に採取した標本（細胞診標本もし  
くは組織標本）である。第 I 期（登録時、8 週、16 週、24 週、32 週）の標本は寛解判定後にま  
とめて治験調整事務局へ送付する。

中央判定委員会は盲検化された 3 名の独立した委員により構成され、各委員がバーチャルスラ  
イドにより標本をレビューして中央病理診断とする。  
実施医療機関の判定と中央病理診断が不一致の場合、下記のように対応する。

- (1) 中央病理診断で、子宮内膜異型増殖症および高分化型類内膜癌以外の組織型の場合は解析から除外する。
- (2) 組織型は、中央判定結果に従い解析する。

## 6.5. 登録されなかった被験者の取り扱い

同意取得後、不適格などの何らかの理由で登録が行われなかった場合は、登録されなかった被験者となり、治験の症例には含めない。ただし、スクリーニング期間内であれば再検査を許容する。治験責任医師又は治験分担医師は、当該被験者に本治験への登録が不可である旨を説明する。

## 6.6. 投与スケジュール及び投与量・投与方法

【メトホルミン非投与群：A 群（MPA のみ）】

### ➤ 第Ⅰ期

#### 第Ⅰ期の治療法

- 併用薬（MPA）は初回処方日（0 週 Day-1）の翌日から服用開始する。初回処方日の翌日を治療期の開始日（Day1）と定義する。0 週 Day-1 の来院は、原則として登録後 14 日以内とする。
- MPA の服用量は 1 日 600mg とし、36 週来院時（寛解判定日）まで服用する。
- MPA 服用中は血栓予防を目的として低用量アスピリンの併用を許容する。

#### 経過観察と効果判定

- 第Ⅰ期は 4 週毎に外来経過観察を行う。8 週毎に麻酔下全面搔爬術による子宮内膜組織診を施行し、効果判定を行なう。
- 効果判定は搔爬術施行後初回の外来までに行なうこととし、規定来院の許容範囲を超えない事とする。判定結果が出るまで MPA の投与を継続する。32 週時点の効果判定〔寛解判定〕は 4 週以内に行うこととする。
- 32 週時に CR が得られた症例を寛解とし、第Ⅱ期の治療に移行する。
- 32 週時に CR が得られない症例は非寛解として治験中止とする。

➤ 第Ⅱ期

第Ⅱ期の治療法

- 妊娠を希望しない症例は、原則治験完了まで月経コントロールを施行する（**6.11. 併用薬・併用療法** 参照）。
- 挙児希望症例に対しては直ちに妊娠を許可する。ただし一定期間月経コントロールを行うかどうかは施設ごとの判断で行う。
- 挙児希望症例はなるべく不妊治療を行い、短期間での妊娠をめざす。

【メトホルミン 750mg 群：B 群（MPA＋メトホルミン 750mg/day）】

➤ 第Ⅰ期

第Ⅰ期の治療法

- MPA は、1 日 600mg を 36 週来院時（寛解判定日）まで投与する。
- MPA は治験薬（メトホルミン）と同時に服用開始する。
- MPA 服用中は血栓予防を目的として低用量アスピリンの併用を許容する。

治験薬の投与

- 治験薬（メトホルミン）は初回処方日（0 週 Day-1）の翌日から服用開始する。初回処方日の翌日を治療期の開始日（Day1）と定義する。0 週 Day-1 の来院は、原則として登録後 14 日以内とする。
- メトホルミンの初回投与は 500mg（250mg×2、分 2）とする。
- メトホルミン開始 4 週間の経過観察後に、**6.7.3. 増量基準**に従い、750mg（250mg×3、分 3）に増量する。
- 以後、**6.7. 減量・休薬基準**に従い、適切に減量、休薬を行なう。ただし、最大投与量を 750mg とする。
- 全面掻爬術施行時は、当日のメトホルミン服用は中断する。

| 用量調整段階 | 1 日服用量 | 1 回服用量 | 1 日の服用回数 |
|--------|--------|--------|----------|
| 1 段階   | 500mg  | 250mg  | 2 回      |
| 2 段階   | 750mg  | 250mg  | 3 回      |

## 経過観察と効果判定

- 第Ⅰ期は4週毎に外来経過観察を行う。8週毎に麻酔下全面掻爬術による子宮内膜組織診を施行し、効果判定を行なう。
- 効果判定は掻爬術施行後初回の外来までに行なうこととし、規定来院の許容範囲を超えない事とする。判定結果が出るまでMPAとメトホルミンの投与を継続する。32週時点の効果判定〔寛解判定〕は4週以内に行うこととする。
- 32週時にCRが得られた症例を寛解とし、第Ⅱ期の治療に移行する。
- 32週時にCRが得られない症例は非寛解として治験中止とする。

### ➤ 第Ⅱ期

#### 第Ⅱ期の治療法

- 第Ⅰ期36週来院時に寛解判定が得られた症例では、MPAの投与を終了し、メトホルミンのみ投与を継続する。
- 最大投与量を750mgとし、**6.7. 減量・休薬基準**に従い適切に減量、休薬を行なう。
- 妊娠を希望しない症例は、原則治験完了まで月経コントロールを施行する（**6.11. 併用薬・併用療法** 参照）。
- 挙児希望症例に対しては直ちに妊娠を許可する。ただし一定期間月経コントロールを行うかどうかは施設ごとの判断で行う。
- 挙児希望症例はなるべく不妊治療を行い、短期間での妊娠をめざす。

#### 【メトホルミン1500mg群：C群（MPA+メトホルミン1500mg/day）】

### ➤ 第Ⅰ期

#### 第Ⅰ期の治療法

- MPAは、1日600mgを36週来院時（寛解判定日）まで投与する。
- MPAは治験薬（メトホルミン）と同時に服用開始する。
- MPA服用中は血栓予防を目的として低用量アスピリンの併用を許容する。

#### 治験薬の投与

- 治験薬（メトホルミン）は初回処方日（0週Day-1）の翌日から服用開始する。初回処

方日の翌日を治療期の開始日（Day1）と定義する。0 週 Day-1 の来院は、原則として登録後 14 日以内とする。

- メトホルミンの初回投与は 500mg（250mg×2、分 2）とする。
- メトホルミン開始 4 週後に、**6.7.3. 増量基準**に従い、4 週毎に 1500mg まで漸増する。増量は 500mg（250mg×2、分 2）→750mg（250mg×3、分 3）→1500mg（250mg×6、分 3）とする。
- 以後、**6.7. 減量・休薬基準**に従い、適切に減量、休薬を行なう。ただし、最大投与量を 1500mg とする。
- 全面掻爬術施行時は、当日のメトホルミン服用は中断する。

| 用量調整段階 | 1 日服用量 | 1 回服用量 | 1 日の服用回数 |
|--------|--------|--------|----------|
| 1 段階   | 500mg  | 250mg  | 2 回      |
| 2 段階   | 750mg  | 250mg  | 3 回      |
| 3 段階   | 1500mg | 500mg  | 3 回      |

経過観察と効果判定

- 第Ⅰ期は 4 週毎に外来経過観察を行う。8 週毎に麻酔下全面掻爬術による子宮内膜組織診を施行し、効果判定を行なう。
- 効果判定は掻爬術施行後初回の外来までに行なうこととし、規定来院の許容範囲を超えない事とする。判定結果が出るまで MPA とメトホルミンの投与を継続する。32 週時点の効果判定〔寛解判定〕は 4 週以内に行うこととする。
- 32 週時に CR が得られた症例を寛解とし、第Ⅱ期の治療に移行する。
- 32 週時に CR が得られない症例は非寛解として治験治療を中止する。

➤ 第Ⅱ期

第Ⅱ期の治療法

- 第Ⅰ期 36 週来院時に寛解判定が得られた症例では、MPA の投与を終了し、メトホルミンのみ投与を継続する。
- 最大投与量を 1500mg とし、**6.7. 減量・休薬基準**に従い適切に減量、休薬を行なう。
- 妊娠を希望しない症例は、原則治験完了まで月経コントロールを施行する（**6.11. 併用**

薬・併用療法 参照)。

- 挙児希望症例に対しては直ちに妊娠を許可する。ただし一定期間月経コントロールを行うかどうかは施設ごとの判断で行う。
- 挙児希望症例はなるべく不妊治療を行い、短期間での妊娠をめざす。

## 6.7. 治験薬及び併用薬の減量・休薬基準

治験責任医師又は治験分担医師は有害事象の発現時や検査実施時に減量・休薬の必要性を判断し、適宜減量・休薬を行うことができるものとする。本治験で特に定める減量・休薬基準は以下の通りとし、表に従う。

### 6.7.1. 第Ⅰ期における MPA 及びメトホルミンの減量・休薬・再開・中止基準

第Ⅰ期において、下記に示す有害事象、臨床検査値異常等が発生した場合、治験責任医師及び治験分担医師は下表に従い減量・休薬し、改善が認められた場合は治験薬投与を再開する。

- 下表に示す有害事象が出現した場合は、記載に従い休薬し、症状や検査値の改善を認めた後に再開する。
- MPA の休薬期間は、連続最長 4 週間とする。
- メトホルミンの休薬期間は、MPA と同時に休薬する場合もあり、第Ⅰ期では連続最長 8 週間までとする。
- 有害事象の改善確認は、被験者の状態に応じて適宜実施する。MPA・メトホルミンそれぞれ決められた連続休薬期間を超える場合は治験中止とする。
- メトホルミンによる悪心・嘔吐・下痢は高頻度だが、休薬により直ちに改善するが多い。投与中の一過性の症状の場合、被験者の判断で休薬、再開は可能とするが、症状が持続する場合は休薬とする（1 日基準を超えても、被験者の判断で 1 日休薬するのみで改善していれば継続可能）。一時的な休薬の場合、服薬コンプライアンスが低下しないように注意する。
- メトホルミン投与開始直後や増量直後は、消化器症状（下痢、悪心、腹部膨満、食欲不振など）が起こることが多く、服用続けるうちに軽減することが多いことを、被験者に説明しておく。症状が持続する場合は適切に有害事象・合併症の対症療法を行う（6.11.2 参照）。

| 判断基準                                                                                                                                                                                           | A 群(MPA)                                                                                                                                                                               | B,C 群(MPA・メトホルミン)                                                                                                                                                                                                                                                                                                   |
|------------------------------------------------------------------------------------------------------------------------------------------------------------------------------------------------|----------------------------------------------------------------------------------------------------------------------------------------------------------------------------------------|---------------------------------------------------------------------------------------------------------------------------------------------------------------------------------------------------------------------------------------------------------------------------------------------------------------------|
| <p>(1) 臨床検査値異常</p> <ul style="list-style-type: none"> <li>AST(GOT)及び ALT(GPT) 施設基準値上限の 2.5 倍以上</li> <li>総ビリルビン 2.0mg/dl 以上</li> <li>血清クレアチニン 1.2 mg/dl 以上</li> <li>eGFR 60mL/min 未満</li> </ul> | <p>MPA を休薬する。</p> <p>検査結果が左記中止基準以下に改善したことを確認したのち、<b>400mg に減量して再開する。</b></p> <p>再開後、再度左記中止基準となった場合は<b>治験中止</b>とする。</p> <p>なお、再開後、600mg への増量はしない。</p>                                   | <p>MPA 及びメトホルミンを休薬する。</p> <p>検査結果が左記休薬基準以下に改善したことを確認したのち、まず <b>MPA を 400mg に減量して再開する。</b>再開後に左記基準を超える場合は、<b>治験中止</b>とする。</p> <p>なお、再開後、MPA は 600mg へ増量しない。</p> <p>MPA を 400mg で再開後、左記基準を超えない場合は<b>メトホルミンを一段階減量して再開する</b>(メトホルミンの再開・中止基準は 6.7.2 表(1)参照)。</p> <p>500 mg 投与時に休薬した場合は、500 mg で再開する。また、一段階減量後は増量しない。</p> |
| <p>(2) grade 1 以上の嘔吐が持続<br/>grade 2 以上の悪心・下痢が持続</p>                                                                                                                                            | <p>MPA を休薬する。</p> <p>休薬後、対症療法を施行し、grade1 以下に改善後 MPA を再開する。再開できると判断された場合、MPA を <b>400mg に減量して再開</b>する。減量再開後も事象が継続し、MPA 服用困難と医師が判断した場合は<b>治験中止</b>とする。</p> <p>なお、再開後、600mg への増量はしない。</p> | <p><b>メトホルミンのみ休薬する。</b></p> <p>メトホルミンによる有害事象の場合が多いため、まずメトホルミンの再開・中止基準に従う。(6.7.2 表(2)参照)</p> <p>メトホルミンを休薬しても改善しない場合は、MPA の有害事象と考え、左記基準で MPA の休薬、再開、中止を判断する。</p> <p>MPA が投与可能な場合、<b>メトホルミンを元の投与量で再開する。</b>再開後の対応は 6.7.2.表(2)に従う。</p>                                                                                  |
| <p>(3)胃腸症状、倦怠感、筋肉痛、過呼吸等の症状が急激に発現し乳酸アシドーシスを強く疑う場合</p>                                                                                                                                           |                                                                                                                                                                                        | <p>メトホルミンを休薬する。</p> <p>休薬後、直ちに血液ガス分析を施行し、確定診断を行う。</p> <p>乳酸アシドーシスが否定されれば、症状改善後メトホルミンを同量で<b>再開する。</b>(メトホルミンの再開・中止基準は 6.7.2 表(3)参照)。</p>                                                                                                                                                                             |
| <p>(4) D-ダイマー 1.5µg/ml を超える</p>                                                                                                                                                                | <p><b>血栓スクリーニング</b>を施行する。</p> <p>スクリーニングにより血栓を認めた場合は<b>治験中止</b>とする。血栓を認めない場合は継続し、脳梗塞、心筋梗塞、肺塞栓症、腸間膜血栓症、網膜血栓症、血栓性静脈炎等の症状やこれらの初期症状が現れたらただちに<b>治験中止</b>とする。</p>                            |                                                                                                                                                                                                                                                                                                                     |

| 判断基準                                                                                                                                                                  | A群(MPA) | B,C群(MPA・メトホルミン)                                                                                                                     |
|-----------------------------------------------------------------------------------------------------------------------------------------------------------------------|---------|--------------------------------------------------------------------------------------------------------------------------------------|
| (5) 7.4.に記載のMPAによる重大な副作用の出現                                                                                                                                           | 治験中止    |                                                                                                                                      |
| (6) 7.1.に記載のメトホルミンによる重大な副作用の出現                                                                                                                                        |         | 治験中止                                                                                                                                 |
| (7)メトホルミン禁忌・慎重投与および基本的注意事項に該当する以下の場合。<br>・発熱・下痢・嘔吐・食事摂取不良等で脱感染症や発熱を認め、脱水が懸念される場合<br>・重症感染症・手術前後・重篤な外傷（禁忌）<br>・激しい筋肉運動をした場合<br>・過度のアルコール摂取（禁忌）<br>・ヨード造影剤を用いた検査時（慎重投与） |         | <b>メトホルミンを休薬する。</b><br>休薬後、左記臨床症状の改善を確認したのち <b>同量で再開する。</b><br>※ヨード造影剤を用いた検査時は、緊急の場合を除き、ヨード造影剤の投与前から <b>投与後 48 時間まで、メトホルミンを休薬する。</b> |

#### 6.7.2. 第Ⅱ期におけるメトホルミンの減量・休薬・再開・中止基準 (B,C 群)

第Ⅱ期において、下記に示す有害事象、臨床検査値異常等が発生した場合、治験責任医師及び治験分担医師は下表に従い速やかに減量あるいは休薬（最大連続4週間）し、改善が認められた場合は治験薬投与を再開する。

- 改善確認は被験者の状態に応じて適宜実施し、MPA、メトホルミンそれぞれに決められた連続休薬期間を超える場合は、治験中止とする。
- メトホルミンによる悪心・嘔吐・下痢は高頻度だが、休薬により直ちに改善するが多い。投与中の一過性の症状の場合、被験者の判断で休薬、再開は可能とするが、症状持続する場合は休薬とする。一時的な休薬の場合、服薬コンプライアンスが低下しないように注意する。
- 第Ⅱ期に新たに上記有害事象が生じた場合は、第Ⅱ期に服用開始した併用薬による有害事象の可能性が考えられる（月経コントロール目的の低用量・中用量卵胞ホルモン・黄体ホルモン配合剤など）。まず、新たに併用した薬剤の中止を検討し事象が継続する場合は基準に従い対応する。

| 判断基準                                                                                                                                                                        | 500mg 投与時                                                                                                                  | 750mg 投与時                                                                                     | 1500mg 投与時                                                     |
|-----------------------------------------------------------------------------------------------------------------------------------------------------------------------------|----------------------------------------------------------------------------------------------------------------------------|-----------------------------------------------------------------------------------------------|----------------------------------------------------------------|
| (1) 臨床検査値異常<br>• AST(GOT)及び ALT(GPT)<br>施設基準値上限の 2.5 倍以上<br>• 総ビリルビン 2.0mg/dl 以上<br>• 血清クレアチニン 1.2 mg/dl 以上<br>• eGFR 60mL/min 未満                                           | 治験中止                                                                                                                       | メトホルミンを休薬する。<br>休薬後、臨床検査異常の改善を確認したのち、500mg で再開する。<br>500mg まで減量しても異常が継続する場合は治験中止とする。          | メトホルミンを休薬する。<br>休薬後、臨床検査異常の改善を確認したのち、750mg で再開する。              |
| (2) grade1 以上の嘔吐が持続<br>grade 2 以上の悪心・下痢が持続                                                                                                                                  | 治験中止                                                                                                                       | メトホルミンを休薬する。<br>休薬後、対症療法を施行し、grade1 以下に改善を確認した場合は 500mg で再開する。500mg まで減量しても症状が継続する場合は治験中止とする。 | メトホルミンを休薬する。<br>休薬後、対症療法を施行し、grade1 以下に改善を確認した場合は 750mg で再開する。 |
| (3) 胃腸症状、倦怠感、筋肉痛、過呼吸等の症状が急激に発現し乳酸アシドーシスを強く疑う場合                                                                                                                              | メトホルミンを休薬する。<br>休薬後、直ちに血液ガス分析を施行し確定診断を行う。<br>乳酸アシドーシスを認めた場合は治験中止とする。乳酸アシドーシスが否定されれば症状改善後に同量で再開する。再開後も左記症状が出現した場合は、治験中止とする。 |                                                                                               |                                                                |
| (4) 7.1.に記載のメトホルミンによる重大な副作用の出現                                                                                                                                              | 治験中止                                                                                                                       |                                                                                               |                                                                |
| (5) メトホルミン禁忌・慎重投与および基本的注意事項に該当する以下の場合。<br>• 発熱・下痢・嘔吐・食事摂取不良等で脱感染症や発熱を認め、脱水が懸念される場合<br>• 重症感染症・手術前後・重篤な外傷（禁忌）<br>• 激しい筋肉運動をした場合<br>• 過度のアルコール摂取（禁忌）<br>• ヨード造影剤を用いた検査時（慎重投与） | メトホルミンを休薬する。<br>休薬後、左記臨床症状の改善を確認したのち同量で再開する。<br>※ヨード造影剤を用いた検査時は、緊急の場合を除き、ヨード造影剤の投与前から投与後 48 時間まで、メトホルミンを休薬する。              |                                                                                               |                                                                |
| (6) 妊娠の可能性がある場合                                                                                                                                                             | メトホルミンを休薬する。                                                                                                               |                                                                                               |                                                                |

|  |                                                                                                                                                                                        |
|--|----------------------------------------------------------------------------------------------------------------------------------------------------------------------------------------|
|  | <p>妊娠の可能性がある場合は直ちにメトホルミンを休薬し治験責任医師又は治験分担医師へ連絡。直ちに妊娠の有無を確認。</p> <p>妊娠していなかった場合は服用再開、妊娠が判明した場合は休薬を続ける。</p> <p>流産あるいは死産を認めた場合、8週以内にメトホルミンの服用を再開する。再開時は初回投与量から増量基準に従い増量し、休薬前の投与量で維持する。</p> |
|--|----------------------------------------------------------------------------------------------------------------------------------------------------------------------------------------|

### 6.7.3. メトホルミンの増量基準

第Ⅰ期のメトホルミン漸増の際、下記に該当する場合にメトホルミンを増量する。また、有害事象によるメトホルミン減量後は増量せず、減量後の用量を維持する。

- 6.7.1.に記載の減量休薬基準が出現しない場合
- Grade1 の倦怠感・悪心・下痢は対症療法施行し増量可。ただし、担当医の判断で増量は困難と判断した場合は同用量で継続する。

### 有害事象 grade の判断基準

有害事象が発生した際の grade について、下表を参照する。

|     | grade1                                               | grade2                                                |
|-----|------------------------------------------------------|-------------------------------------------------------|
| 悪心  | 摂食習慣に影響のない食欲低下                                       | 顕著な体重減少、脱水または栄養失調を伴わない経口摂取量の減少                        |
| 嘔吐  | 24 時間に 1-2 エピソードの嘔吐 (5 分以上間隔が開いたものを、それぞれ 1 エピソードとする) | 24 時間に 3-5 エピソードの嘔吐 (5 分以上間隔が開いたものを、それぞれ 1 エピソードとする)  |
| 下痢  | ベースラインと比べて <4 回/日の排便回数増加：ベースラインと比べて人工肛門からの排泄量が軽度増加   | ベースラインと比べて 4-6 回/日の排便回数増加：ベースラインと比べて人工肛門からの排泄量が中等度に増加 |
| 倦怠感 | だるさ、または元気がない                                         | だるさ、または元気がない；身の回り以外の日常生活動作の制限                         |

### 6.8. 妊娠の可能性・妊娠が判明した場合の取扱い

本治験では、第Ⅱ期に移行した被験者について妊娠を許容する。妊娠の可能性がある場合は、当該被験者は直ちに治験責任医師又は治験分担医師へ連絡することとしメトホルミンを休薬する。妊娠が確定したら休薬を継続するが、妊娠が否定された場合は直ちにメトホルミンを再開する。妊娠の判定は治験実施医療機関以外の医療機関で行ってもよい。

なお、流産、死産並びに子の先天異常等を認めた場合は、有害事象として扱い、**9.5.2. 重篤な有害事象の報告手順**に従い報告を行うものとする。

- 1) 妊娠確認後、妊娠 22 週以降の生児を獲得した場合は、妊孕性温存療法の真の目的を達成したと判断し、分娩後の 8 週以内に完了時検査を施行し治験を終了する。
- 2) 本治験対象者は、妊娠成立後も一定頻度流産・死産を認めると想定される。流産・死産となった場合は、流産・死産の処置後経過順調なことを確認し、8 週以内にメトホルミンの服用を再開する。不妊治療を継続しない場合は、原則として月経コントロールを併用する。
- 3) 流産・死産後に再開する場合、経過観察は寛解後の最も近い経過観察スケジュールに従う。

## 6.9. 個々の症例の完了・中止基準

### 6.9.1. 完了基準

個々の被験者の完了は、最終被験者における治験薬投与開始日（第 I 期 Day1）を起点として、156 週後（第 II 期の 120 週時に相当）に最も近い規定検査時とする。治験完了時検査は原則として、最終被験者の 156 週後を超えないこととする。ただし、最終被験者の 156 週後の時点で第 II 期 120 週時を超えていない場合はこの限りではなく、当該被験者の第 II 期 120 週時検査を治験完了時検査とみなす。また、最終被験者がその後治験中止に至った場合でも、各被験者の完了時期は変更しない。

妊娠し 22 週以降の生児を獲得した場合は、分娩後 8 週以内に完了時の検査を施行し治験を終了する。治験終了時に妊娠中の被験者は、最後に経過観察を行った日のデータを完了時検査とし、治験完了とする。

### 6.9.2. 中止基準

以下の基準に該当した場合、治験責任医師又は治験分担医師は治験を中止し、規定の中止時検査を行う。

- 1) I 期において、以下に該当し MPA 療法が奏効しない場合。
  - 悪性度の上昇など、PD が疑われた場合
  - 16 週時の病理検査で癌が残存しホルモン効果が認められない(SD)の場合
  - 32 週時の病理検査で CR が得られない場合

- 2) 一旦寛解（32 週時効果判定）後、子宮内膜異型増殖症・子宮内膜癌の再発を認めた場合。
- 3) 治験薬を最終段階まで減量しても有害事象が発現し、かつ治験責任医師又は治験分担医師が中止を必要と認めた場合。
- 4) 有害事象、臨床検査値異常が 4 週間休薬後も投与基準まで改善しない場合。
- 5) ステロイドの長期投与により全身に影響があると医師が判断した場合。
- 6) MPA 及びメトホルミンの投与継続が困難な有害事象が発現し、かつ治験責任医師又は治験分担医師が中止を必要と認めた場合。
- 7) 合併症などにより、治験責任医師又は治験分担医師が中止を必要と認めた場合。
- 8) 被験者からの中止の申し出があった場合。
- 9) その他、治験責任医師又は治験分担医師が被験者の治験継続が不可能と判断した場合。
- 10) 治験調整医師または治験調整委員会が中止の決定を判断した場合。

なお、治験が中止された場合の「中止日」は、中止の理由となる事象が発現した日ではなく、治験責任医師又は治験分担医師が中止と判断した日とする。

ただし、1) 及び 2) について、施設判断で寛解・非再発としたが中央判定で非寛解・再発と判断された場合は、中央判定結果を速やかに担当医師に連絡し、担当医師が中止と判断した日を中止日とする。

## 6.10. 服薬状況調査の報告

担当医師は全ての被験者について来院ごとに MPA 及びメトホルミンの服薬状況（服薬コンプライアンス）を調査し、EDC に入力する。処方投与量、服薬コンプライアンス、服用中止の場合は中止日を確認する。

服薬コンプライアンスは以下の通り確認する。

MPA は 1 日 2 錠（400mg）以上服用していれば、服用ありと判断する。

メトホルミンは、500mg 処方された場合は 500mg、750mg 処方された場合は 500mg 以上、1500mg 処方された場合は 750mg 以上服用していれば服用ありと判断する。

来院ごとに、前来院日から来院前日までの服用すべき日数\*を 100%とし、服用ありの日数の割合（%）を記録する。

\* 医師の判断を伴う休薬の場合（妊娠期間を含む）は、服用あり・なしの判断の計算に含めない。

## 6.11. 併用薬・併用療法

### 6.11.1. 情報収集する併用薬・併用療法

以下の併用療法に関してデータを収集する。

- (1) 血栓予防のために使用した低用量アスピリン
- (2) 第Ⅱ期に月経コントロールに使用した薬剤

月経コントロールは Holmstrom 療法と規定する。Holmstrom 療法は、MPA 10-15mg/日（1 日 2~3 回に分割）を 14 日服用、14 日休薬の周期投与で行う。（新たな有害事象の懸念があるため、第Ⅰ期に使用した MPA による月経コントロールを行う）

ただし、第 2 度無月経のため、黄体ホルモン単独で消退出血を認めない場合は、低・中用量ピルによる月経コントロールも許容する。

- (3) 糖尿病・高脂血症の治療に使用した薬剤
- (4) 有害事象に対する処置及び使用した薬剤
- (5) 有害事象の原因となった薬剤
- (6) 併用禁止薬

### 6.11.2. 有害事象・合併症の対症療法

- (1) 下痢の対症療法

下痢を認める場合は、プロバイオティクス（ミヤ BM, ビオフェルミン等）を併用する。塩酸ロペラミド(ロペミンカプセル 1mg)も服用可とする。

- (2) 悪心・嘔吐・上部消化器症状の対症療法

悪心・嘔吐の軽減を目的とした制吐剤の予防的・治療的投与は可能である。また、胃潰瘍、慢性胃炎などに対して H2 ブロッカー、プロトンポンプ阻害剤の服用可とする。

- (3) 高脂血症・軽度肝機能障害時

肥満例では、高脂血症や脂肪肝で肝機能異常を認める場合があるが、高脂血症薬の投与は許容する。脂肪肝と診断され、治療開始時に投与基準内の軽度肝機能異常、高脂血症を認める場合は、高脂血症薬、肝保護剤の服用を検討する。

## 6.12. 併用禁止薬・併用禁止療法

本治験に参加中は、評価に影響を及ぼすと考えられる抗腫瘍効果を期待した治療の併用は認めない。

- 他の抗悪性腫瘍薬
- 他のホルモン療法
- 免疫療法
- 放射線療法
- 手術療法（子宮摘出をした場合は、治験中止）
- 治験薬以外のビグアナイド系糖尿病治療薬
- 長期投与により全身に影響があると判断されるステロイド剤

## 6.13. 治験終了後の後治療

病理学的再発を認めた後の治療や、治験終了・中止後の後治療は特に規定しない。

# 7. 治験薬

## 7.1. 治験薬の概要

治験薬の詳細及び取り扱いに関しては、治験薬概要書を参照する。本治験で使用する治験薬は以下のとおりである。

|       |                 |                 |
|-------|-----------------|-----------------|
| 一般名   | メトホルミン塩酸塩       |                 |
| 成分・含量 | 有効成分            | メトホルミン塩酸塩 250mg |
| 剤型    | 白色円形フィルムコーティング錠 |                 |

|       |                                                                                                                                                                                                                                                                                                                                                                                                                                                                                                                                                                                              |                                                                                     |
|-------|----------------------------------------------------------------------------------------------------------------------------------------------------------------------------------------------------------------------------------------------------------------------------------------------------------------------------------------------------------------------------------------------------------------------------------------------------------------------------------------------------------------------------------------------------------------------------------------------|-------------------------------------------------------------------------------------|
|       | 添加物                                                                                                                                                                                                                                                                                                                                                                                                                                                                                                                                                                                          | D-マンニトール<br>トウモロコシデンプン<br>ヒプロメロース<br>ステアリン酸マグネシウム<br>プロピレングリコール<br>酸化チタン<br>カルナウバロウ |
| 保存条件  | 気密容器、室温保存                                                                                                                                                                                                                                                                                                                                                                                                                                                                                                                                                                                    |                                                                                     |
| 効能・効果 | 2 型糖尿病<br>ただし、下記のいずれかの治療で十分な効果が得られない場合に限る。<br>(1) 食事療法・運動療法のみ<br>(2) 食事療法・運動療法に加えてスルホニルウレア剤を使用                                                                                                                                                                                                                                                                                                                                                                                                                                                                                               |                                                                                     |
| 用法・用量 | 通常、成人にはメトホルミン塩酸塩として 1 日量 500mg より開始し、1 日 2 ～3 回食後に分割経口投与する。維持量は効果を観察しながら決めるが、1 日最高投与量は 750mg とする。                                                                                                                                                                                                                                                                                                                                                                                                                                                                                            |                                                                                     |
| 禁忌    | <ol style="list-style-type: none"> <li>1. 乳酸アシドーシスを起こしやすい状態の患者 <ol style="list-style-type: none"> <li>(1) 乳酸アシドーシスの既往</li> <li>(2) 腎機能障害（軽度障害も含む）</li> <li>(3) 透析患者（腹膜透析も含む）</li> <li>(4) 肝機能障害</li> <li>(5) ショック、心不全、心筋梗塞、肺塞栓など心血管系、肺機能に高度の障害のある患者及びその他の低酸素血症を伴いやすい状態</li> <li>(6) 過度のアルコール摂取者</li> <li>(7) 脱水症、脱水状態が懸念される下痢、嘔吐等の胃腸障害のある患者</li> <li>(8) 高齢者</li> </ol> </li> <li>2. 重症ケトosis、糖尿病性昏睡又は前昏睡、1 型糖尿病の患者</li> <li>3. 重症感染症、手術前後、重篤な外傷のある患者</li> <li>4. 栄養不良状態、飢餓状態、衰弱状態、脳下垂体機能不全又は副腎機能不全の患者</li> <li>5. 妊婦又は妊娠している可能性のある婦人</li> <li>6. 本剤の成分又はビグアナイド系薬剤に対し過敏症の既往歴のある患者</li> </ol> |                                                                                     |
| 副作用   | <p>総症例 2455 例中、副作用の報告されたものは 525 例（21.38%）であり、その主なものは下痢 170 例（6.92%）、食欲不振 80 例（3.26%）、腹痛 52 例（2.12%）、悪心 41 例（1.67%）等の消化器症状であった。</p> <ol style="list-style-type: none"> <li>1. 重大な副作用 <ol style="list-style-type: none"> <li>(1) 乳酸アシドーシス（頻度不明）<br/>乳酸アシドーシス（血中乳酸値の上昇、乳酸/ピルビン酸比の上昇、血液 pH の低下等を示す）は予後不良のことが多い。一般的に発現する臨床症</li> </ol> </li> </ol>                                                                                                                                                                                                                                                |                                                                                     |

状は様々であるが、胃腸症状、倦怠感、筋肉痛、過呼吸等の症状がみられることが多く、これらの症状があらわれた場合には直ちに投与を中止し、必要な検査を行うこと。なお、乳酸アシドーシスの疑いが大きい場合には、乳酸の測定結果等を待つことなく適切な処置を行うこと。

(2) 低血糖（頻度不明）

低血糖症状があらわれることがあるので、患者の状態を十分観察しながら投与する。低血糖症状（初期症状：脱力感、高度の空腹感、発汗等）が認められた場合には通常はショ糖を投与し、 $\alpha$ -グルコシダーゼ阻害剤（アカルボース、ボグリボース、ミグリトール）との併用により低血糖症状が認められた場合にはブドウ糖を投与すること。

(3) 肝機能障害、黄疸（頻度不明）

AST（GOT）、ALT（GPT）、ALP、 $\gamma$ -GTP、ビリルビンの著しい上昇等を伴う肝機能障害、黄疸があらわれることがあるので、観察を十分にを行い、異常が認められた場合には投与を中止し、適切な処置を行うこと。

(4) 横紋筋融解症

筋肉痛、脱力感、CK（CPK）上昇、血中及び尿中ミオグロビン上昇を特徴とする横紋筋融解症があらわれることがあるので、このような場合には投与を中止し、適切な処置を行うこと。

2. その他の副作用

|      | 5%以上 | 0.1～5%未満               | 0.1%未満 | 頻度不明                                                       |
|------|------|------------------------|--------|------------------------------------------------------------|
| 消化器  | 下痢   | 食欲不振、腹痛、悪心、嘔吐、腹部膨満感、便秘 | 消化不良等  | 胃炎、胃腸障害、放屁増加                                               |
| 血液   |      |                        |        | 貧血、白血球減少、血小板減少、白血球増加、好酸球増加                                 |
| 過敏症  |      | 発疹等                    |        | そう痒                                                        |
| 肝臓   |      |                        |        | 肝機能異常                                                      |
| 腎臓   |      |                        |        | BUN 上昇、クレアチニン上昇                                            |
| 代謝異常 |      |                        |        | CK（CPK）上昇、ケトosis、乳酸上昇、血中カリウム上昇、血中尿酸増加                      |
| その他  |      | 全身倦怠感、頭痛、頭重            | 眠気     | 筋肉痛、めまい、ふらつき、味覚異常、浮腫、動悸、発汗、脱力感、空腹感、ビタミン B <sub>12</sub> 減少 |

7.2. 治験薬の包装・表示

ラベルには、治験用である旨、治験調整医師（代表）の氏名及び職名並びに住所、治験薬コード名、治験薬の製造番号、貯蔵方法、使用期限を記載する。ラベルは PTP シートの包装箱に表示する。

|            |                                            |
|------------|--------------------------------------------|
| 治験用        | CCRC-001-M                                 |
|            | 本治験以外の目的で使用しないこと                           |
| 一般名        | メトホルミン塩酸塩                                  |
| 化学名        | 1,1-Dimethylbiguanide monohydrochloride    |
| 製造番号       | XXXX                                       |
| 環境条件       | 気密容器、室温保存                                  |
| 使用期限       | YY 年 MM 月                                  |
| 治験調整医師(代表) | 千葉大学医学部附属病院 婦人科 准教授 三橋 暁<br>千葉市中央区亥鼻 1-8-1 |

7.3. 治験薬の管理方法

- 1) 治験調整医師は治験開始後速やかに治験薬を実施医療機関の治験責任医師へ交付する。交付にあたっては、手順書に従う。
- 2) 治験実施医療機関の「治験薬の管理に関する手順書」に従い、治験薬を適切に管理する。
- 3) 治験責任医師は、治験薬の供給される保存条件、使用期限等取扱い方法を説明した文書（前述の手順書中に記載しているため、当該手順書が該当する）を治験実施医療機関の長、治験分担医師、治験協力者、治験薬管理者等に交付する。
- 4) 治験薬管理者は、「治験薬の管理に関する手順書」に従い治験薬を適切に保管し、管理及び使用状況を記録する。なお、本治験薬は本治験のみに使用し、他の目的に使用してはならない。
- 5) 治験責任医師及び治験薬管理者は、「治験薬管理表」の記載内容と治験薬使用数量の整合性について確認する。治験終了後は各実施医療機関にて「治験薬の管理に関する手順書」に従い、治験薬を廃棄する。

## 7.4. 併用薬

MPA を本治験の併用薬とする。MPA は、治験スケジュールに従い第 I 期に投与する。

|       |                                                                                                                                                                                                                                                                                                                                                                                                                                                                                                                                                                                                                                                                                                                                                                                                                                                                    |                                                                |
|-------|--------------------------------------------------------------------------------------------------------------------------------------------------------------------------------------------------------------------------------------------------------------------------------------------------------------------------------------------------------------------------------------------------------------------------------------------------------------------------------------------------------------------------------------------------------------------------------------------------------------------------------------------------------------------------------------------------------------------------------------------------------------------------------------------------------------------------------------------------------------------|----------------------------------------------------------------|
| 一般名   | メドロキシプロゲステロン酢酸エステル錠                                                                                                                                                                                                                                                                                                                                                                                                                                                                                                                                                                                                                                                                                                                                                                                                                                                |                                                                |
| 成分・含量 | 有効成分                                                                                                                                                                                                                                                                                                                                                                                                                                                                                                                                                                                                                                                                                                                                                                                                                                                               | メドロキシプロゲステロン酢酸エステル 200mg                                       |
| 剤型    | 白色・割線入り素錠                                                                                                                                                                                                                                                                                                                                                                                                                                                                                                                                                                                                                                                                                                                                                                                                                                                          |                                                                |
|       | 添加物                                                                                                                                                                                                                                                                                                                                                                                                                                                                                                                                                                                                                                                                                                                                                                                                                                                                | 日局カルメロースカルシウム<br>日局ステアリン酸マグネシウム<br>日局乳糖水和物<br>日局ヒドロキシプロピルセルロース |
| 保存条件  | 室温保存                                                                                                                                                                                                                                                                                                                                                                                                                                                                                                                                                                                                                                                                                                                                                                                                                                                               |                                                                |
| 効能・効果 | 乳癌<br>子宮体癌（内膜癌）                                                                                                                                                                                                                                                                                                                                                                                                                                                                                                                                                                                                                                                                                                                                                                                                                                                    |                                                                |
| 用法・用量 | 乳癌には、メドロキシプロゲステロン酢酸エステルとして通常成人 1 日 600 ～ 1200mg を 3 回に分けて経口投与する。<br>子宮体癌（内膜癌）には、メドロキシプロゲステロン酢酸エステルとして通常成人 1 日 400～600mg を 2～3 回に分けて経口投与する。<br>なお、症状により適宜増減する。                                                                                                                                                                                                                                                                                                                                                                                                                                                                                                                                                                                                                                                                                                      |                                                                |
| 併用禁忌  | ホルモン剤（黄体ホルモン、卵胞ホルモン、副腎皮質ホルモン等）との併用は血栓症を起こす恐れが高くなるため、併用禁忌である。                                                                                                                                                                                                                                                                                                                                                                                                                                                                                                                                                                                                                                                                                                                                                                                                       |                                                                |
| 副作用   | <p>調査症例数 4,104 例中、副作用発現症例は 1,166 例（28.4%）であり、副作用発現件数は延べ 1,749 件であった。その主なものは、体重増加 532 件（13.0%）、満月様顔貌 254 件（6.19%）、子宮出血 227 件（5.53%）、浮腫 63 件（1.54%）、血栓症 56 件（1.37%）、月経異常 44 件（1.07%）等であった。<br/>           （承認時までの調査及び市販後の使用成績調査の集計）</p> <ol style="list-style-type: none"> <li>1. 重大な副作用               <ol style="list-style-type: none"> <li>(1) 血栓症（1.37%）<br/>                   脳梗塞、心筋梗塞、肺塞栓症、腸間膜血栓症、網膜血栓症、血栓性静脈炎等があらわれることがあるので観察を十分に行い、このような症状又はこれらの初期症状があらわれた場合には、投与を中止し適切な処置を行うこと。</li> <li>(2) うっ血性心不全（0.02%）<br/>                   うっ血性心不全があらわれることがあるので観察を十分に行い、このような症状があらわれた場合には減量又は休薬等適切な処置を行うこと。</li> <li>(3) アナフィラキシー（頻度不明）<br/>                   アナフィラキシー様症状等があらわれたとの報告があるので、このような症状があらわれた場合には投与を中止すること。</li> <li>(4) 乳頭水腫（頻度不明）<br/>                   視力消失、眼球突出、複視、片頭痛が急にあらわれた場合には、投与を一時中断し、眼科的検査を実施すること。その結果、乳頭水腫であると診断された</li> </ol> </li> </ol> |                                                                |

|  |                         |                           |                       |
|--|-------------------------|---------------------------|-----------------------|
|  | 場合には、投与を中止し、適切な処置を行うこと。 |                           |                       |
|  | 2. その他の副作用              |                           |                       |
|  |                         | 0.1～15%未満                 | 0.1%未満                |
|  |                         |                           | 頻度不明                  |
|  | 内分泌                     | 満月様顔貌、子宮出血、月経異常、帯下の変化、無月経 | 多毛、乳房痛、乳汁漏出           |
|  | 血液                      |                           | 白血球数増加、血小板数増加         |
|  | 糖代謝                     | 糖尿、耐糖能異常、糖尿病悪化            | 糖尿病性白内障増悪             |
|  | 精神神経系                   | しびれ、頭痛、振戦、めまい             | 筋痙攣、意識低下、抑うつ、多幸症、集中困難 |
|  | 全身症状                    | 体重増加、食欲亢進、発熱、倦怠感          | 疲労感                   |
|  | 電解質代謝                   | 浮腫                        | 高カルシウム血症              |
|  | 眼                       | 視覚障害                      |                       |
|  | 肝臓                      | LDH、AST、ALT上昇             | 胆汁うっ滞性黄疸              |
|  | 循環器                     | 血圧上昇、動悸                   | 頻脈                    |
|  | 消化器                     | 腹痛、悪心・嘔吐、食欲不振、口渇、便秘、下痢    |                       |
|  | 皮膚・粘膜                   | 発疹、発汗、座瘡、そう痒感             | 蕁麻疹                   |
|  | その他                     | 潮紅、息切れ、嘔声、熱感              |                       |

1  
2  
3  
4  
5  
6  
7  
8  
9  
10  
11  
12  
13  
14  
15  
16  
17  
18  
19  
20  
21  
22  
23  
24  
25  
26  
27  
28  
29  
30  
31  
32  
33  
34  
35  
36  
37  
38  
39  
40  
41  
42  
43  
44  
45  
46  
47  
48  
49  
50  
51  
52  
53  
54  
55  
56  
57  
58  
59  
60

8. 観察・検査・評価項目、方法及び実施時期

8.1. 実施スケジュールと手順

治験責任医師又は治験分担医師は、以下の観察・検査・評価の実施スケジュールに従い観察・検査等を実施する。

第Ⅰ期：MPA 投与期のスケジュール

| 観察時期                  | スクリーニング<br>登録前*1 | 第Ⅰ期：MPA 治療期    |               |               |                |                |                |                |                |                |                       | 第Ⅰ期の<br>中止時*7 |
|-----------------------|------------------|----------------|---------------|---------------|----------------|----------------|----------------|----------------|----------------|----------------|-----------------------|---------------|
|                       |                  | 0 週<br>(Day-1) | 4 週<br>(1 か月) | 8 週<br>(2 か月) | 12 週<br>(3 か月) | 16 週<br>(4 か月) | 20 週<br>(5 か月) | 24 週<br>(6 か月) | 28 週<br>(7 か月) | 32 週<br>(8 か月) | 36 週 (9 か月)<br>(寛解判定) |               |
| 許容範囲 (日)              | -28 日            | +14 日          | -7~+14 日      | -7~+14 日      | -7~+14 日       | -7~+14 日       | -7~+14 日       | -7~+14 日       | -7~+14 日       | -7~+14 日       | - 21 日                | +14 日         |
| 文書による同意取得             | ●                |                |               |               |                |                |                |                |                |                |                       |               |
| 登録・割付                 |                  | ●              |               |               |                |                |                |                |                |                |                       |               |
| 治験薬および併用薬の処方*2        |                  | ●*3            | ●             | ●             | ●              | ●              | ●              | ●              | ●              | ●              |                       |               |
| 患者背景調査                | ●                |                |               |               |                |                |                |                |                |                |                       |               |
| 身体所見 (身長*4・体重・BMI・PS) | ●                |                |               | ●             |                | ●              |                | ●              |                | ●              |                       | ●             |
| 服薬状況確認                |                  |                | ●             | ●             | ●              | ●              | ●              | ●              | ●              | ●              | ●                     | ●             |
| 子宮内膜組織診 (麻酔下全面搔爬術) *5 | ●                |                |               | ●             |                | ●              |                | ●              |                | ●              |                       |               |
| 効果判定 (寛解の判定) *6       |                  |                |               | ●             |                | ●              |                | ●              |                | ●              | ●                     |               |
| 血液学的検査                | ●                |                | ●             | ●             | ●              | ●              | ●              | ●              | ●              | ●              | ●                     | ●             |
| 生化学検査                 | ●*8              |                | ●             | ●*8           | ●              | ●*8            | ●              | ●*8            | ●              | ●*8            |                       | ●             |
| 血糖検査                  | ●*8              |                |               | ●*8           |                | ●*8            |                | ●*8            |                | ●*8            |                       |               |
| ホルモン検査                | ●                |                |               |               |                |                |                |                |                |                |                       |               |
| HbA1c                 | ●                |                |               | ▲*9           |                | ▲*9            |                | ▲*9            |                | ▲*9            |                       |               |
| D-ダイマー                | ●                |                | ▲*10          | ▲*10          | ▲*10           | ▲*10           | ▲*10           | ▲*10           | ▲*10           | ▲*10           |                       | ▲*10          |
| 心電図                   | ●                |                |               |               |                |                |                |                |                |                |                       | ▲*11          |
| 骨盤・胸部 CT              | ▲*12             |                |               |               |                |                |                |                |                | ▲*12           |                       | ▲*11          |
| 骨盤 MRI                | ▲*12             |                |               |               |                |                |                |                |                |                |                       | ▲*11          |
| 経膈超音波検査               | ●*13             |                |               | ●             |                | ●              |                | ●              |                | ●              |                       |               |
| 75g OGTT              | ●*14             |                |               |               |                |                |                |                |                |                |                       |               |
| 有害事象の観察               |                  | ←              |               |               |                |                |                |                |                |                |                       | →             |
| 併用薬の確認                | ←                |                |               |               |                |                |                |                |                |                |                       | →             |

※ 治験薬投与開始日 (Day1) は治験薬初回処方日 (Day-1) の翌日とする。

※ 36 週来院時に寛解判定を行い、第Ⅱ期に移行できると医師が判断した場合は治験薬及び併用薬を処方する。

※ 36 週来院時 (第Ⅱ期の治験薬処方日) の翌日を第Ⅱ期の起点 (Day1) とする。

※ Ⅰ期、Ⅱ期ともに、4 週 (Day28) を 1 か月と考え、それぞれの期の起点から週数を計算する。

\*1: スクリーニング検査は同意後、登録前 4 週 (28 日) 以内に実施する。ただし、病理検査データ並びに CT 及び MRI 検査データは、通常診療下で実施したデータを使用できるものとする。確定診断に至る病理検査は同意取得前 24 週 (168 日) 以内、CT・MRI は同意取得前 8 週 (56 日) 以内であれば使用可とする (他院で施行したものも使用可)。

\*2: 治験薬の処方は B 群及び C 群に対して行う。A 群は併用薬のみ処方する。

\*3: 初回処方日の翌日から治験薬服用開始する。初回処方日の翌日を治療期の開始日 (Day 1) と定義する。0 週 Day-1 の来院は原則として登録後 14 日以内とする。

\*4: 身長は初回のみ測定する。

\*5: MPA 投与中の内膜搔爬術による検査は、8 週毎に行う。前 7 日～後 14 日を許容範囲とする。同日空腹時採血を行う。

\*6: 効果判定は内膜搔爬術施行後初回の外来受診日で実施する。36 週時の効果判定 (寛解判定) 来院日まで治験薬及び併用薬の服用は継続する。

\*7: 有害事象で中止後、因果関係の否定できない有害事象が発現している場合は、可能な限り回復するまで観察を継続する。

\*8: 空腹時採血を実施する。

\*9: 登録前の HbA1c (NGSP) が 6.5 以上の場合経過測定を行う。

\*10: 血栓が疑われる場合に実施する。

\*11: 増悪時や有害事象発生時、必要に応じて施行する。

\*12: 子宮体癌症例では必須とし、子宮内膜異型増殖症例は必須としない。

\*13: スクリーニング検査では PCO の有無を確認する。

\*14: 糖尿病やスクリーニング検査で糖尿病の基準に達する場合 (HbA1c 6.5 以上かつ空腹時血糖  $\geq 126$  mg/dL) は、実施しない。

第 II 期：維持治療期のスケジュール

| 観察時期                         | 第 I 期<br>36 週<br>(寛解判定) | 第 II 期：維持治療期   |                 |                |                 |                 |                 |                 |                 |                  |                  |                  |                  |
|------------------------------|-------------------------|----------------|-----------------|----------------|-----------------|-----------------|-----------------|-----------------|-----------------|------------------|------------------|------------------|------------------|
|                              |                         | 12 週<br>(3 か月) | 24 週<br>(6 か月)  | 36 週<br>(9 か月) | 48 週<br>(12 か月) | 60 週<br>(15 か月) | 72 週<br>(18 か月) | 84 週<br>(21 か月) | 96 週<br>(24 か月) | 108 週<br>(27 か月) | 120 週<br>(30 か月) | 132 週<br>(33 か月) | 144 週<br>(36 か月) |
| 許容範囲 (日)                     | - 21 日                  | ±28 日          | ±28 日           | ±28 日          | ±28 日           | ±28 日           | ±28 日           | ±28 日           | ±28 日           | ±28 日            | ±28 日            | ±28 日            | ±28 日            |
| 治験薬および維持治療薬 (月経コントロール薬) の処方  | ●                       | ●              | ●               | ●              | ●               | ●               | ●               | ●               | ●               | ●                | ●                | ●                | ●                |
| 不妊治療状況・挙児希望の有無 <sup>*1</sup> |                         |                | ●               |                | ●               |                 | ●               |                 | ●               |                  | ●                |                  | ●                |
| 服薬状況確認 <sup>*2</sup>         | ●                       | ●              | ●               | ●              | ●               | ●               | ●               | ●               | ●               | ●                | ●                | ●                | ●                |
| 身体所見 (体重、BMI、PS)             |                         |                | ●               |                | ●               |                 | ●               |                 | ●               |                  | ●                |                  | ●                |
| 子宮内膜検査 <sup>*3</sup>         |                         | ●              | ●               | ●              | ●               | ●               | ●               | ●               | ●               | ●                | ●                |                  | ●                |
| 効果判定 (寛解の判定)                 | ●                       |                |                 |                |                 |                 |                 |                 |                 |                  |                  |                  |                  |
| 血液学的検査                       |                         |                | ●               |                | ●               |                 | ●               |                 | ●               |                  | ●                |                  | ●                |
| 生化学検査                        |                         |                | ● <sup>*4</sup> |                | ● <sup>*4</sup> |                 | ● <sup>*4</sup> |                 | ● <sup>*4</sup> |                  | ● <sup>*4</sup>  |                  | ● <sup>*4</sup>  |
| 空腹時血糖及びインスリン                 |                         |                | ● <sup>*4</sup> |                | ● <sup>*4</sup> |                 | ● <sup>*4</sup> |                 | ● <sup>*4</sup> |                  | ● <sup>*4</sup>  |                  | ● <sup>*4</sup>  |
| HbA1c                        |                         |                | ▲ <sup>*5</sup> |                | ▲ <sup>*5</sup> |                 | ▲ <sup>*5</sup> |                 | ▲ <sup>*5</sup> |                  | ▲ <sup>*5</sup>  |                  | ▲ <sup>*5</sup>  |
| 心電図                          |                         |                |                 |                |                 |                 |                 |                 |                 |                  |                  |                  |                  |
| 骨盤・胸部 CT                     |                         |                |                 |                |                 |                 |                 |                 |                 |                  | ▲ <sup>*6</sup>  |                  |                  |
| 骨盤 MRI                       |                         |                |                 |                |                 |                 |                 |                 |                 |                  |                  |                  |                  |
| 有害事象の観察                      | ←                       |                |                 |                |                 |                 |                 |                 |                 |                  |                  |                  | →                |
| 併用薬の確認                       | ←                       |                |                 |                |                 |                 |                 |                 |                 |                  |                  |                  | →                |
| 転帰の判定                        |                         |                |                 |                |                 |                 |                 |                 |                 |                  | ●                |                  |                  |

※ 第 II 期の Day1 は、36 週来院時 (第 I 期終了時) の翌日とする。

\*1：不妊治療状況、妊娠・挙児希望の有無などを確認する。

\*2：妊娠期間・その他メトホルミンの中断期間を確認する。

\*3：寛解後の経過観察は吸引組織診・簡易組織診・細胞診などで行う。外来での組織診で異常が指摘された場合や、内膜細胞診で疑陽性以上の場合は麻酔下の全面掻爬術で組織検査を行う。再発が確定しない場合は、再検査施行まで経過観察を行う。

\*4：検査日採血は空腹で実施する。

\*5：登録前の HbA1c(NGSP) が 6.5 以上の場合経過測定を行う。

\*6：子宮体癌症例では必須とし、子宮内膜異型増殖症症例では必要に応じて実施する。

Ver. 2.0

| 観察時期                         | 第 II 期：維持治療期     |                  |                  |                  |                  |                  |                  |                  |                  | 完了時             | 第 II 期の中止時 <sup>*6</sup> |
|------------------------------|------------------|------------------|------------------|------------------|------------------|------------------|------------------|------------------|------------------|-----------------|--------------------------|
|                              | 156 週<br>(39 か月) | 168 週<br>(42 か月) | 180 週<br>(45 か月) | 192 週<br>(48 か月) | 204 週<br>(51 か月) | 216 週<br>(54 か月) | 228 週<br>(57 か月) | 240 週<br>(60 か月) | 252 週<br>(63 か月) |                 |                          |
| 許容範囲 (日)                     | ±28 日            | -84 日           |                          |
| 治験薬および維持治療薬 (月経コントロール薬) の処方  | ●                | ●                | ●                | ●                | ●                | ●                | ●                | ●                | ●                |                 |                          |
| 不妊治療状況・育児希望の有無 <sup>*1</sup> |                  | ●                |                  | ●                |                  | ●                |                  | ●                |                  | ●               |                          |
| 服薬状況確認 <sup>*2</sup>         | ●                | ●                | ●                | ●                | ●                | ●                | ●                | ●                | ●                | ●               | ●                        |
| 身体所見 (体重、BMI、PS)             |                  | ●                |                  | ●                |                  | ●                |                  | ●                |                  | ●               |                          |
| 子宮内膜検査 <sup>*3</sup>         |                  | ●                |                  | ●                |                  | ●                |                  | ●                |                  | ●               | ● <sup>*7</sup>          |
| 血液学的検査                       |                  | ●                |                  | ●                |                  | ●                |                  | ●                |                  | ●               | ●                        |
| 生化学検査                        |                  | ● <sup>*4</sup>  |                  | ● <sup>*4</sup>  |                  | ● <sup>*4</sup>  |                  | ● <sup>*4</sup>  |                  | ● <sup>*4</sup> | ●                        |
| 空腹時血糖及びインスリン                 |                  | ● <sup>*4</sup>  |                  | ● <sup>*4</sup>  |                  | ● <sup>*4</sup>  |                  | ● <sup>*4</sup>  |                  | ● <sup>*4</sup> |                          |
| HbA1c                        |                  | ▲ <sup>*5</sup>  |                  | ▲ <sup>*5</sup>  |                  | ▲ <sup>*5</sup>  |                  | ▲ <sup>*5</sup>  |                  | ▲ <sup>*5</sup> |                          |
| 心電図                          |                  |                  |                  |                  |                  |                  |                  |                  |                  |                 | ▲ <sup>*8</sup>          |
| 骨盤・胸部 CT                     |                  |                  |                  |                  |                  |                  |                  |                  |                  |                 | ▲ <sup>*8</sup>          |
| 骨盤 MRI                       |                  |                  |                  |                  |                  |                  |                  |                  |                  |                 | ▲ <sup>*8</sup>          |
| 有害事象の観察                      | ←                |                  |                  |                  |                  |                  |                  |                  |                  |                 | →                        |
| 併用薬の確認                       | ←                |                  |                  |                  |                  |                  |                  |                  |                  |                 | →                        |
| 転帰の判定                        |                  |                  |                  |                  |                  |                  |                  |                  |                  | ●               | ●                        |

※ 第 II 期の Day1 は、36 週来院時 (第 I 期終了時) の翌日とする。

\*1：不妊治療状況、妊娠・育児希望の有無などを確認する。

\*2：妊娠期間・その他メトホルミンの中断期間を確認する。

\*3：寛解後の経過観察は吸引組織診・簡易組織診・細胞診などで行う。外来での組織診で異常が指摘された場合や、内膜細胞診で疑陽性以上の場合は麻酔下の全面掻爬術で組織検査を行う。

\*4：検査日採血は空腹で実施する。

\*5：登録前の HbA1c(NGSP) が 6.5 以上の場合経過測定を行う。

\*6：-84 日以内の最終受診日のデータで可とし、不足する検査のみ実施する。

\*7：再発で中止の場合、再発と確定した時点での検査結果を報告。有害事象で中止の場合は必要なし。

\*8：再発時や有害事象発生時に必要に応じて施行する。

### 8.1.1. スクリーニング検査

文書による同意取得後、スクリーニング検査を開始する。治験責任医師又は治験分担医師は以下のスクリーニング検査を行い、選択基準を満たし、除外基準に抵触しない患者を症例登録する。検査項目は以下に記載の通りとする。

- (1) 患者背景（被験者識別コード、生年月日、同意取得年月日、病理検査実施日、組織診断名、婚姻状態、不妊治療歴・期間、月経不順の有無、妊娠・出産歴、既往歴、合併症、前治療（月経コントロールの方法及び薬剤）の有無、PCOSの有無、家族歴（Lynch 症候群））
- (2) 身体所見（ECOG PS、身長、体重、BMI 値）
- (3) 子宮内膜全面搔爬術による組織診  
※確定診断を行う病理検査は子宮内膜全面搔爬術に限らず、他院を含む同意取得前 24 週（168 日）以内の子宮内膜検査の結果を採用できる。  
※子宮内膜全面搔爬術以外の方法で確定診断を行った場合、他院を含む同意取得前 24 週（168 日）から登録前までの子宮内膜全面搔爬術にて他の組織型癌が否定できることを確認する。
- (4) 血液学的検査（WBC、Hb、Plt）
- (5) 生化学検査（AST、ALT、Cr、eGFR、T-Bil、Ca、空腹時 TG・LDL・HDL）
- (6) 血糖検査（空腹時 Glucose・insulin）、HOMA-R  
空腹時血糖値及びインスリン値を測定し、HOMA-R を算出する。（HOMA-R=空腹時血糖値×空腹時インスリン値÷405）
- (7) ホルモン検査（LH、FSH、PRL、E2、testosterone）
- (8) HbA1c
- (9) D-ダイマー
- (10) 心電図
- (11) 経膈超音波検査（内膜厚、多嚢胞性卵巣の有無）
- (12) 骨盤・胸部 CT、骨盤 MRI（筋層浸潤、遠隔転移、リンパ節腫大の有無）  
※子宮体癌症例は必須とする。子宮内膜異型増殖症症例では必須とせず、必要に応じて実施する。  
※CT は原則として造影 CT とする。
- (13) 耐糖能検査（75gOGTT）  
※既に糖尿病と診断されている場合やスクリーニング検査で糖尿病の基準に達する場合（HbA1c 6.5 以上かつ空腹時血糖 $\geq$ 126mg/dL）は検査を行わない。

糖負荷前、負荷後 30 分、60 分、120 分の血糖値及びインスリン値を測定する。

(14) 併用薬の確認

(1)、(2)、(4)～(11)、(13)の検査値は、同意取得後、登録日前 4 週（28 日）以内に収集する。

(3)のデータは、通常診療下で行われた同意取得前 24 週（168 日）から登録前までのデータであれば使用可とする。

(12)のデータは、同意取得前 8 週（56 日）から登録前までのデータであれば使用可とする。

### 8.1.2. 第 I 期の観察・検査・評価項目

MPA 投与中は 1 か月毎に以下の項目を経過観察する。以下の項目についてデータを収集し EDC に入力する。

#### 8.1.2.1. 0 週（0 か月）

- (1) 登録、割付
- (2) 治験薬および併用薬の処方

#### 8.1.2.2. 4 週（1 か月）、12 週（3 か月）、20 週（5 か月）、28 週（7 か月）

- (1) 治験薬および併用薬の処方
- (2) 服薬状況確認
- (3) 血液学的検査（WBC、Hb、Plt）
- (4) 生化学検査（AST、ALT、Cr、eGFR、T-Bil、Ca）
- (5) D-ダイマー ※血栓が疑われる場合に実施する。
- (6) 有害事象の観察（悪心、嘔吐、食欲不振、下痢、その他の異常所見の有無について観察を行う）
- (7) 併用薬の確認（参照：6.11.併用薬・併用療法）

#### 8.1.2.3. 8 週（2 か月）、16 週（4 か月）、24 週（6 か月）

- (1) 治験薬および併用薬の処方
- (2) 身体所見（体重、BMI 値、ECOG PS）
- (3) 服薬状況確認（参照：6.10.服薬状況の報告）

- (4) 子宮内膜組織診（麻酔下の全面搔爬術を行い、組織診断により病変の有無を確認する）。
- (5) 効果判定（内膜検査の結果を次の受診日までに判定する）
- (6) 血液学的検査（WBC、Hb、Plt）
- (7) 生化学検査（AST、ALT、Cr、eGFR、T-Bil、Ca、空腹時 TG・LDL・HDL）
- (8) 血糖検査（空腹時 Glucose・insulin）、HOMA-R を計算
- (9) HbA1c ※登録前の値が 6.5（NGSP）以上の場合のみ測定する。
- (10) D-ダイマー ※血栓が疑われる場合に実施する。
- (11) 超音波検査（内膜厚）
- (12) 有害事象の観察（悪心、嘔吐、食欲不振、下痢、その他の異常所見の有無について観察を行う）
- (13) 併用薬の確認（参照：6.11.併用薬・併用療法）

#### 8.1.2.4. 32 週（8 か月）

- (1) 治験薬および併用薬の処方
- (2) 身体所見（体重、BMI 値、ECOG PS）
- (3) 服薬状況確認
- (4) 子宮内膜組織診（麻酔下の全面搔爬術を行い、組織診断により病変の有無を確認する。）
- (5) 血液学的検査（WBC、Hb、Plt）
- (6) 生化学検査（AST、ALT、Cr、eGFR、T-Bil、Ca、空腹時 TG・LDL・HDL）
- (7) 血糖検査（空腹時 Glucose・insulin）HOMA-R を計算
- (8) HbA1c ※登録前の値が 6.5（NGSP）以上の場合のみ測定する。
- (9) D-ダイマー ※血栓が疑われる場合に実施する。
- (10) 超音波検査（内膜厚）
- (11) 有害事象の観察（悪心、嘔吐、食欲不振、下痢、その他の異常所見の有無について観察を行う）。
- (12) 併用薬の確認（参照：6.11.併用薬・併用療法）
- (13) 骨盤・胸部 CT

※子宮体癌症例は必須とする。子宮内膜異型増殖症症例では必須とせず、必要に応じて実施する。

※CT は原則として造影 CT とする。

#### 8.1.2.5. 寛解判定（36 週,9 か月）

寛解を認めた症例は、来院時に MPA 服用終了を指示する。来院日の翌日より維持治療薬（月経コントロール薬）へ切り替える。非寛解例は治験中止とする。32 週の検査施行後 1-4 週で寛解判定を行う（36 週までには判定を行う）。

- (1) 治験薬および維持治療薬（月経コントロール薬）の処方
- (2) 服薬状況の確認
- (3) 寛解の判定（32 週時に行った内膜検査の結果を判定する。**10.1.3.1.寛解判定** 参照）
- (4) 有害事象の観察（悪心、嘔吐、食欲不振、下痢、その他の異常所見の有無について観察を行う）。
- (5) 併用薬の確認（参照：6.11.併用薬・併用療法）

#### 8.1.2.6. 第Ⅰ期における中止時

治験責任医師または分担医師は、中止と判断した場合は下記の検査を行う。

- (1) 身体所見（体重、BMI 値、ECOG PS）
- (2) 服薬状況確認
- (3) 血液学的検査（WBC、Hb、Plt）
- (4) 生化学検査（AST、ALT、Cr、eGFR、T-Bil、Ca）
- (5) D-ダイマー ※血栓が疑われる場合に実施する。
- (6) 心電図 ※増悪時、有害事象発生時に必要に応じて実施する。
- (7) 骨盤・胸部 CT、骨盤 MRI ※増悪時、有害事象発生時に必要に応じて実施する。
- (8) 有害事象の観察（悪心、嘔吐、食欲不振、下痢、その他の異常所見の有無について観察を行う。）
- (9) 併用薬の確認（参照：6.11.併用薬・併用療法）

#### 8.1.3. 第Ⅱ期の観察・検査・評価項目

第Ⅰ期の 32 週（8 か月）来院時に施行した病理検査の結果、36 週来院時の寛解判定において寛解が確認された症例は第Ⅱ期に移行し、治験を継続する。

寛解判定日を第Ⅱ期の Day-1 とし、翌日を Day1 として Day1 より第Ⅱ期の治療を行う。

##### 8.1.3.1. 12 週（3 か月）毎（12、24、36、48、60、・・・、240、252 週）

- (1) 治験薬（B 群、C 群）および維持治療薬（月経コントロール薬）の処方

(2) 服薬状況の確認 (B 群、C 群)

(3) 子宮内膜の検査 (再発の有無を確認する。) ※ただし 120 週以降は 24 週ごとに行う。

試験掻爬術、吸引組織検査、セルブロックを用いた簡易組織診や細胞診を行う。組織診で異常指摘もしくは、細胞診疑陽性以上の場合は、4 週以内に子宮内膜精密検査を行い再発の有無を確認する。その場合再発イベント発生時は再発と医師が判断した日とする。

(外来経過観察中の内膜組織検査の方法は各施設で判断する)。

再発を疑い全面掻爬術を行っても再発・非再発と断定できない場合は、経過観察後に再検査を施行する。再発と判断されるまでは、治験は継続する。

(4) 有害事象の観察 (悪心、嘔吐、食欲不振、下痢、その他の異常所見の有無について観察を行う。)

(5) 併用薬の確認 (参照: 6.11.併用薬・併用療法)

(6) 骨盤・胸部 CT ※120 週 (30 か月) のみ。

※子宮体癌症例は必須とする。子宮内膜異型増殖症症例では必須とせず、必要に応じて実施する。

※CT は原則として造影 CT とする。

(7) 転帰の判定 ※120 週 (30 か月) のみ

### 8.1.3.2. 24 週 (6 か月) 毎 (24、48、72、96、120、…、216、240 週)

8.1.3.1.の項目に加え、下記の評価を実施する。

(1) 不妊治療状況・挙児希望の有無の確認

(2) 身体所見 (体重、BMI 値、ECOG PS)

(3) 血液学的検査 (WBC、Hb、Plt)

(4) 生化学検査 (AST、ALT、Cr、eGFR、T-Bil、空腹時 TG・LDL・HDL)

(5) 血糖検査 (空腹時 Glucose、insulin) HOMA-R を計算

(6) HbA1c ※登録前の値が 6.5 以上の場合、測定する。

### 8.1.3.3. 第 II 期における中止時

下記の検査を実施する。(1) は再発を疑った時点のデータで可とする。

有害事象により治験を中止した場合、(1)は実施しない。

(1) 子宮内膜検査 (再発の有無を確認する。)

8.1.3.2.に記載のように、通常 visit 時に施行した試験掻爬術、吸引組織検査、セルブロックを用

いた簡易組織診や細胞診で再発を疑う場合は、4 週以内に子宮内膜精密検査を行う。

再発と確定した病理組織検査結果を記録する。

- (2) 服薬状況の確認
- (3) 血液学的検査（WBC、Hb、Plt）
- (4) 生化学検査（AST、ALT、Cr、eGFR、T-Bil）
- (5) 心電図 ※再発時、有害事象発生時に必要に応じて実施する。
- (6) 骨盤・胸部 CT、骨盤 MRI ※再発時、有害事象発生時に必要に応じて実施する。
- (7) 有害事象の観察（悪心、嘔吐、食欲不振、下痢、その他の異常所見の有無について観察を行う。）
- (8) 併用薬の確認（参照：6.11.併用薬・併用療法）
- (9) 転帰の判定

#### 8.1.4. 必要に応じて実施する安全性評価項目

全身倦怠感、筋肉痛、過呼吸などの乳酸アシドーシスを否定できない症状を認めた場合は、血液ガス分析を実施する。

#### 8.1.5. 完了時

治験の完了時には、下記の検査結果を確認する。なお、完了時検査が 8.1.3.1 12 週毎に示す項目のみの Visit であった場合、完了時検査の 12 週前に実施した規定 Visit（8.1.3.2 24 週毎を含む）より結果を補填できる。もし規定通り観察・検査・評価を実施していない場合には、完了時に再度検査を実施し、治験完了とする。

- (1) 不妊治療状況・挙児希望の有無の確認
- (2) 服薬状況確認
- (3) 身体所見（体重、BMI、ECOG PS）
- (4) 子宮内膜検査（再発の有無を確認する。）

試験掻爬術、吸引組織検査、セルブロックを用いた簡易組織診や細胞診を行う。組織診で異常指摘もしくは細胞診疑陽性以上の場合は、精密検査を行う（外来経過観察中の内膜組織検査の方法は各施設で判断）。

- (5) 血液学的検査（WBC、Hb、Plt）
- (6) 生化学検査（AST、ALT、Cr、eGFR、T-Bil、空腹時 TG・LDL・HDL）

- (7) 血糖検査（空腹時 GLU、insulin）（HOMA-R を計算）
- (8) HbA1c ※登録前の値が 6.5 以上の場合、測定する。
- (9) 有害事象の観察（悪心、嘔吐、食欲不振、下痢、その他の異常所見の有無について観察を行う。）
- (10) 併用薬の確認（参照：6.11.併用薬・併用療法）
- (11) 転帰の判定

8.1.6. 妊娠時

被験者の妊娠を認めた場合は、治験責任医師または分担医師は以下の情報を収集する。

- 1) 妊娠確認日
- 2) 妊娠方法（自然妊娠、不妊治療）
- 3) 妊娠転帰（流産・死産・生産、転帰週数）
- 4) 生児獲得日（分娩日）

また、妊娠中は可能な限りスケジュールに沿って来院し、経過観察を行う。里帰り出産などのため来院が難しい場合は、電話連絡などで状況を確認することも可とする。

9. 有害事象発生時の取扱い

9.1. 有害事象の定義

有害事象とは同意取得後、Day1 以降に発生した全ての好ましくない、あるいは意図しない徴候（臨床検査値の異常変動を含む）、症状または疾病のことであり、治験薬との因果関係を問わない。本治験では、治験薬投与時から治験終了後 30 日までに発現したあらゆる好ましくない医療上のできごとを有害事象として取り扱う。

9.2. 有害事象発生時の被験者への対応

治験責任医師または治験分担医師は、有害事象を認めたときは、直ちに適切な処置を行うとともに、治験薬の投与を中止した場合や、有害事象に対する治療が必要となった場合には、被験者にその旨を伝える。

### 9.3. 報告の対象となる有害事象

同意取得後、Day1以降に発生した有害事象は、治験薬との因果関係の有無に関わらず、全て記録に残す。治験薬服用中に治験終了もしくは中止となった場合は、治験終了後 30 日までに発生した有害事象について、治験薬との因果関係によらず記録に残す。治験薬との因果関係が否定できない有害事象が、治験期間終了までに未回復の場合は、原則として回復するまで追跡する。ただし、治験責任医師又は治験分担医師が、治験薬の影響は消失しており被験者の安全性は十分確保され、それ以上の追跡は必要ないと判断した場合、原疾患の悪化や合併症の悪化等による症状が慢性化している場合、もしくは転院や後治療の開始等で観察が困難な場合は、この限りではない。治験薬との因果関係が否定できる有害事象については、追跡期間は治験終了後 30 日までとする。

### 9.4. 有害事象の評価に必要な記載内容

- 1) 有害事象の名称
- 2) 発現日
- 3) 消失日
- 4) 転帰：回復、軽快、回復したが後遺症あり、未回復、死亡、不明
- 5) 処置（治験薬の投与）：変更なし、中止、休薬、減量、該当せず
- 6) その他の処置：なし、薬物治療、その他
- 7) 重篤度：非重篤、重篤
- 8) 重症度：Grade1～5（CTCAE, version 4.0 分類に従う）
- 9) 治験薬との因果関係：関連あり、関連なし

#### 9.4.1. 有害事象の回復性と治験薬との因果関係

有害事象における治験薬との因果関係の判定に際しては、少なくとも合理的な可能性があり、否定できない有害事象を副作用と定義する。因果関係判定を行う際には、投与中止後の消失、投与再開後の再発、既に当該治験薬又は類薬において因果関係が確立、交絡するリスク因子がない、暴露量・暴露期間との整合性がある、正確な既往等の裏付けにより治験薬の関与がほぼ間違いなく説明可能、併

1  
2  
3  
4  
5  
6  
7  
8  
9  
10  
11  
12  
13  
14  
15  
16  
17  
18  
19  
20  
21  
22  
23  
24  
25  
26  
27  
28  
29  
30  
31  
32  
33  
34  
35  
36  
37  
38  
39  
40  
41  
42  
43  
44  
45  
46  
47  
48  
49  
50  
51  
52  
53  
54  
55  
56  
57  
58  
59  
60

用治療が原因である合理的な可能性が見られない等を参考にし、治験薬との因果関係が否定できないとされた根拠を記録に残す。

**9.5. 重篤な有害事象発生時の取り扱い**

**9.5.1. 重篤な有害事象の定義**

重篤な有害事象とは、次のいずれかに該当するものとする。

- (1) 死亡に至るもの
- (2) 生命を脅かすもの
- (3) 入院／入院期間の延長
- (4) 永続的または顕著な障害／機能不全
- (5) 先天性異常をきたすもの
- (6) その他、上記に準じて重篤なもの

なお、(3)の「入院」には、再検査、追跡調査のための入院又は入院期間の延長、及び治験前より予定していた療法又は検査を治験中に実施することのみを目的とした入院（予定手術や検査等）は含まれない。（ただし、その入院中に新たに発生したものは有害事象として取扱う。）

**9.5.2. 重篤な有害事象の報告手順**

治験実施中に重篤な有害事象が発生した場合は、治験責任医師又は治験分担医師は、被験者に対して直ちに適切な処置を行う。その上で、次の手順に従い当該有害事象情報を取り扱う。

なお、安全性情報の取り扱い手順については、別途作成する「安全性情報の管理に関する手順書」に従うものとする。

- (1) 自ら治験を実施する者から実施医療機関の長、治験調整委員会及び治験薬提供者への報告

自ら治験を実施する者は、因果関係に関わらず、当該有害事象情報を可能な限り速やかに実施医療機関の長に報告するとともに、治験調整委員会及び治験薬提供者に報告する。報告には「重篤な有害事象に関する報告書」（統一書式 12 及び（医）詳細記載用書式）を用いる。

予測可能性は、次のように判断する。

- 1) 既知
  - 治験薬概要書に記載のある事象

- 本治験で既に発生し、治験責任医師へ報告した事象

2) 未知

- 治験薬概要書に記載のない事象
- 本治験で既に発生し、治験責任医師へ報告した事象であっても、性質、症状の程度又は発現傾向が一致しないもの

(2) 治験調整委員会による各実施医療機関の実施責任医師への通知

治験調整委員会は、自ら治験を実施する者から入手した報告内容を確認し、他の各実施医療機関の自ら治験を実施する者に当該有害事象を通知する。

(3) 自ら治験を実施する者と治験調整委員会との協議

各実施医療機関の自ら治験を実施する者は、治験調整委員会から入手した報告内容を確認し、必要に応じ治験調整委員会と協議し、自ら治験を実施する者としての意見（厚生労働大臣への報告の必要性を含む）を治験調整委員会に報告する。

(4) 厚生労働大臣への報告

自ら治験を実施する者が厚生労働大臣への報告が必要と判断した場合には「様式第 7 及び 8」及び「整理票」を作成し、独立行政法人医薬品医療機器総合機構（以下、「総合機構」という）に報告する。報告の期間については、薬機法施行規則第 273 条に従い、重篤性及び未知・既知等の分類に従い、7 日又は 15 日以内とする。

(5) 実施医療機関の長への報告

自ら治験を実施する者は、他の実施医療機関において発生した重篤な有害事象について、厚生労働大臣への報告がなされた場合には、治験調整委員会より入手した「様式第 7 及び 8」の内容を、可能な限り速やかに実施医療機関の長に報告する。

(6) 追加情報の入手時の対応

当該有害事象が発生した実施医療機関の自ら治験を実施する者は、当該事象に関する追加情報が得られた場合には、可能な限り速やかに実施医療機関の長に追加報告を行うとともに、治験調整委員会及び治験薬提供者に報告する。当該追加情報の取扱いは、上記(1)～(5)の手順に準ずることとし必要に応じ総合機構への報告等を行う。

## 9.6. 重要な有害事象の報告

重篤な有害事象の基準を満たさないが重要な有害事象として、以下を定義する。

乳酸アシドーシス

治験責任医師又は治験分担医師は、重要な有害事象が発現した場合、治験薬との因果関係を問わず適切な処置を行い、治験調整委員会へ速やかに報告する。報告の様式は別紙2（Appendix）を用いる。なお、**9.5.1. 重篤な有害事象の定義**に該当する場合は、**9.5.2. 重篤な有害事象発生時の報告手順**に従い、報告を行う。

9.7. 予測される副作用

副作用とは、有害事象のうち治験薬との因果関係のある事象である。本治験薬メトホルミンは古くから使用される糖尿病治療薬であり、安全性は十分担保されている。しかし、以下のような副作用が考えられる。

グリコラン®錠 250mg の添付文書（第17版）によると、本剤投与症例 2,455 例中、副作用の報告されたものは 525 例（21.38%）であり、その主なものは下痢 170 例（6.92%）、食欲不振 80 例（3.26%）、腹痛 52 例（2.12%）、悪心 41 例（1.67%）等の消化器症状である。また、再評価結果時に報告された重大な副作用は、乳酸アシドーシス、低血糖、肝機能障害、黄疸、横紋筋融解症（いずれも頻度不明）である。

9.8. 重篤な有害事象の報告入手後の治験調整医師/調整事務局の対応手順

9.8.1. 独立データモニタリング委員会への報告

本治験中に治験責任医師より重篤な有害事象の報告を受けた場合、治験調整医師/治験調整事務局は治験の継続の適否または治験実施計画書の変更について独立データモニタリング委員会に審議を依頼することができる。独立データモニタリング委員会は審議した結果を治験調整医師に文書で勧告する。

なお、治験調整医師(治験調整事務局)が報告の内容の重要性、影響性などを判断し、先んじて緊急な対応が必要と判断した場合には、登録の一時停止や参加施設のへの周知事項の緊急連絡などの対策を講ずる。

### 9.8.2. 試験参加施設及び関連機関への連絡

報告された有害事象に対し、独立データモニタリング委員会の審査・勧告内容を試験参加全施設の治験責任医師及び関連機関に文書（電子メール可）にて通知する。参加施設及び関連機関への連絡においては緊急度に応じて電話連絡も可であるが、追って速やかに文書（FAX・郵送・電子メール）による連絡を行う。もし、独立データモニタリング委員会が中止を勧告した場合、治験調整医師は速やかに試験の中止及びその理由を医療機関の長及び各施設の責任医師に報告する。

### 9.9. 緊急時の連絡先

治験調整医師（代表） 三橋 暁

千葉大学医学部附属病院（〒260-8677 千葉県千葉市中央区亥鼻 1-8-1）

TEL：043-222-7171（内線 5314）

FAX：043-226-2122

E-mail：antira@faculty.chiba-u.jp

治験調整事務局

千葉大学医学部附属病院臨床試験部

TEL：043-226-2737（内線 6959）

FAX：043-226-2735

## 10. 評価項目

### 10.1. 効果判定とエンドポイントの定義

#### 10.1.1. 用語の定義

- (1) CR：病理学的に子宮内膜異型増殖症・子宮体癌の消失を認めた場合。（病変が消失し、子宮内膜全面搔爬で組織が採取できず、細胞診異常も認めない場合は臨床的に CR と判断する。）
- (2) PR：子宮内膜異型増殖症・子宮体癌は残存しているが、治療に伴う腫瘍腺管の変性がうかがわれ、間質の脱落膜化変化などホルモン効果がある場合。判定困難な異型腺管の残存も PR と判断する。  
異型のない子宮内膜増殖症の存在は PR と判断する。
- (3) SD：間質の脱落膜化変化などホルモン効果を認めず、治療に伴う腫瘍腺管の変性もうかがわれないもの。
- (4) PD：脱分化など、悪性度の上昇が認められた場合。筋層浸潤・転移を疑う場合。なお、登録時の組

組織が子宮内膜異型増殖症で、経過中に高分化型類内膜癌と判断されても悪性度の上昇とは判断しない。

### 10.1.2. MPA 治療の寛解

治療開始後 32 週時点で行った内膜検査の結果 CR の場合、寛解（病理学的な病変の消失）と判定する。第 I 期の効果判定（寛解判定）は、内膜搔爬（32 週時）後の初回外来受診日に行われる。効果判定日まで MPA の服用を継続する。効果判定は内膜搔爬日（32 週来院）から 4 週（28 日）以内に行うこととする（33-36 週時までに判定）。



\*1 治験中止

\*2 月経コントロール継続。寛解例は直ちに妊娠許可。  
妊娠希望例は積極的に生殖補助医療をすすめる。

### 10.1.3. 寛解・再発時の中央病理診断

#### 10.1.3.1. 寛解判定

寛解・非寛解の効果判定は施設ごとに行いその後の治療継続を判断する。**16.3.病理標本の取扱い**で提出された標本で中央病理診断を施行し最終判定をおこなう。「非寛解例」は、PD 等により治験中止となった日もしくは 32 週時の病理検査施行日をイベント発生日と定義する。

- 施設診断において寛解、中央病理診断において非寛解の場合  
非寛解とした病理検査日をもってイベント発生とし、治験中止とする。
- 施設診断において非寛解、中央病理診断において寛解の場合

治験中止とするが、イベント発生とは判定しない。

### 10.1.3.2. 再発判定

「再発」は病理学的に子宮内膜異型増殖症、癌が確認されることとする。経過観察中は施設ごとに再発の判定を行い、臨床的な取り扱いは施設診断で行う。施設診断で再発と判断した場合は治験を中止してよいが、施設診断で判定に迷う場合は、中央病理診断で判断を行う。再発の最終判断は中央病理診断で行う。中央病理診断の結果、施設診断と異なる結果の場合は中央病理診断の結果を優先する。

実施医療機関の判定と中央病理診断が不一致の場合、下記のように対応する。

- (1) 実施医療機関で「再発なし」、中央病理診断で「再発あり」と判断された場合。

中央病理診断の判定結果が実施医療機関に伝達された時点で、当該被験者は治験中止とする。なお、中央病理診断の判定に従い、再発症例として解析される。

- (2) 実施医療機関で「再発あり」、中央病理診断で「再発なし」と判断された場合。

中央病理診断の判定に従い、無再発症例として解析される。施設診断で再発と判断しすでに治験中止となっている場合は、中止日まで無再発期間として解析する。

### 10.1.4. エンドポイントの定義

#### 10.1.4.1. 3年無再発生存割合

全被験者のうち、治験薬・併用薬投与開始日を起点として3年経過時に寛解を得ており、再発を認めない症例の割合として定義する。

治療開始後3年時に妊娠中であり内膜検査ができない場合

- 1) 完了時検査（分娩後8週以内）で再発を認めない場合には、3年時無再発と判断する。
- 2) 完了時検査（分娩後8週以内）で再発だった場合は、最後に内膜検査を施行した日を最終無再発生存確認日とする。ただし、最終無再発生存確認日が開始後144週（約33か月）以降であれば、3年時無再発と判断する。
- 3) 妊娠中で、治療開始後3年経過時に内膜検査ができず、妊娠中に治験期間が終了した場合：最後に内膜検査を施行した日を最終無再発生存確認日とする。最終無再発生存確認日が開始後144週以降

(約 33 か月)であれば、3 年時無再発と判断する。また、治療開始後 3 年時に妊娠 22 週以降であれば、3 年時無再発と判断する。

#### 10.1.5. 寛解・寛解日

32 週時点の内膜検査で、病変の消失が得られれば寛解と判断し MPA 投与を終了する。32 週時点で病変の消失が得られない場合 (CR 以外) はプロトコル治療中止とし、治験を中止する。寛解日は、寛解と判定した最終病理標本の組織を採取した日とする。

#### 10.1.6. 再発 (Relapse)

外来受診日の検査で再発が強く疑われる場合、子宮内膜精密検査を行い確認する。子宮内膜精密検査で、子宮内膜異型増殖症以上の病変が出現した場合に再発と判断する。ただし、外来受診日に組織検査が行われ、再発と確定できる場合は再発と判断してもよい。

施設の判断で再発と判断した場合は、医師が再発と判断した組織を採取した日を再発日とする。施設と中央病理診断の判断が異なる場合でも、その標本を採取した日を再発日とする。

異型のない子宮内膜増殖症は再発とせず、周期的ホルモン治療を施行し経過観察を行う。

#### 10.1.7. 完全奏効割合

プロトコル治療が行われた症例のうち、MPA 寛解例の割合として定義する。

#### 10.1.8. 無再発生存期間

治験薬投与開始日を起点とし、非寛解もしくは再発までの期間として定義する。

「非寛解例」は、PD 等により治験中止となった日もしくは 32 週時の病理検査施行日をイベント発生日と定義する。「再発」は病理学的に子宮内膜異型増殖症、癌が確認されることとする。

再発と判断されていない被験者では、臨床的に再発が無いことを確認した最終日 (最終無再発生存確認日) をもって治験終了とする。なお、治験完了時は画像検査による無増悪の確認は必須としない。

治験終了時に妊娠中の場合は、便宜上無再発と判断し、治験終了時まで無再発生存期間とする。

## 10.2. 主要評価項目

3 年無再発生存割合

### 【主要評価項目の設定根拠】

MPA 療法により寛解を得た患者においては、再発を認めると子宮温存は不可能であり摘出せざるを得ない。よって患者の QOL 確保という観点から考えると、再発を防止し寛解を維持することが最も重要である。

本治験の対象疾患において MPA 療法による寛解から再発までの中央値は 24 か月（4-22 か月）と報告されており、寛解後 1-3 年で再発するケースが殆どである。ヒストリカルコントロールでは 12 か月経過時点での無再発生存割合が 93%、24 か月では 80%、36 か月で 46.8%であり、再発例の 89%は 36 か月までに再発している。このことから、本治験においては治療開始から 3 年経過時点で再発の有無を判断することが、メトホルミンの有効性を評価する上で最も効果的であると考えた。

## 10.3. 副次評価項目

### 【有効性の副次評価項目】

完全奏功割合、無再発生存期間、インスリン抵抗性・BMI 改善割合、妊娠率、妊娠・周産期予後

### 【安全性の副次評価項目】

有害事象の発生頻度

有害事象の評価には「有害事象共通用語規準 v4.0 日本語訳 JCOG 版（NCI-Common Terminology Criteria for Adverse Events v4.0（CTCAE v4.0）の日本語訳）」を用いる。

## 11. 統計学的事項

本治験の統計解析計画の概要を以下にまとめた。なお、統計解析計画の詳細は、統計解析計画書に記載する。統計解析計画書において本治験実施計画書の概要を修正することがあるが、主要評価項目の定義や解析方法が変更される場合には、本治験実施計画書を改訂する。

1  
2  
3  
4  
5  
6  
7  
8  
9  
10  
11  
12  
13  
14  
15  
16  
17  
18  
19  
20  
21  
22  
23  
24  
25  
26  
27  
28  
29  
30  
31  
32  
33  
34  
35  
36  
37  
38  
39  
40  
41  
42  
43  
44  
45  
46  
47  
48  
49  
50  
51  
52  
53  
54  
55  
56  
57  
58  
59  
60

**11.1. 解析対象集団**

**11.1.1. 全登録例**

全登録例を、「6.4. 施設登録及び症例登録・割付方法」に従い登録された患者のうち重複登録や誤登録を除いた集団と定義する。

**11.1.2. 最大の解析対象集団 (full analysis set : FAS)**

本治験に登録され無作為割付された患者で、割付後のデータを有し、主要評価項目について、登録前とそれ以後の測定値を有する患者とする。重大な治験実施計画書違反の患者については除外する。本集団を本治験の主たる解析対象集団とし、本集団に対しては全ての有効性の解析を実施する。

**11.1.3. 治験実施計画書に適合した対象集団 (per protocol set : PPS)**

FAS から、治験方法や併用療法など治験実施計画書の規定に対し以下の重大な違反があった症例を除きプロトコル遵守した被験者を、PPS と定義する。

- 選択基準違反
- 除外基準違反
- 併用禁止薬違反
- 併用禁止療法違反
- コンプライアンス不遵守：  
来院ごとに規定量の薬剤を服用した日数を確認し、服用日数が 80% 以上の場合に服用ありと判断する。服用ありと確認した回数が全体の 75% 以上の場合にコンプライアンス遵守とする。
- 登録時標本の中央病理診断の結果、選択基準（1）を満たさないと判明した症例

**11.1.4. 安全性解析対象集団**

ランダム化割付され、割付後のデータを有する患者とする。本集団に対して全ての安全性の解析を実施する。

**11.2. 目標症例数と設定根拠**

解析対象例数:120 名(A 群:40 例、B 群:40 例、C 群:40 例)

## 【設定根拠】

本研究の主たる目的は、子宮内膜異型増殖症及び IA 期子宮体癌患者を対象に、MPA 単独群をコントロールとして、MPA+メトホルミン（750mg）群、MPA+メトホルミン（1500mg）群における無再発生存期間を比較することで、有効性の検証とメトホルミンの適切な用量を決定することである。

### 1. 第I期治療の寛解率についての検討

MPA 単独療法の妊孕性温存療法の寛解率は、子宮体癌症例で 76%（Gallos）、78%（Gunderson）、64%（Ushijima）、子宮内膜症異型増殖症例では、86%（Gallos）、86%（Gunderson）、96%（ushijima）となっており、子宮体癌と子宮内膜症異型増殖の療法の混在する場合、平均すると 80.5%となる。一方で、MPA+メトホルミン併用療法では、当院の Phase 2 試験の報告より 9 か月の奏功率は 81%となっている。これらの事から第 I 期の治療の寛解率を 80%と見積もった。

### 2. 第II期治療の寛解から再発についての検討

プロゲステロン療法で病変消失した症例のうち子宮内膜異型増殖症の 38%（Ushijima）、26%（Gallos）、子宮体癌の 57%（Ushijima）、41%（Gallos）に再発を認める。

MPA 単独療法では、寛解から再発までの中央値（50%）は 24 か月と報告されている。また当院のヒストリカルコントロールでは、無再発生存割合の中央値（50%）は 30 か月である。MPA+メトホルミン併用療法では、寛解した 29 例のうち（観察期間の中央値 38 か月）で 3 例（10%）が再発した。

### 3. 症例数の算出

先行研究から、MPA 単独群の無再発率を 60%、MPA+メトホルミン併用群の無再発率を 85%と仮定し、両群共通の設定として、第 1 期での寛解率 80%、第 2 期での途中脱落の確率 5%、妊娠の確率 10%、妊娠期間中に試験終了した場合は試験中無再発例として取扱い、両側有意水準 5%で、検出力 80%とした。以上の設定でシミュレーションによる症例数算出を行った結果、1 群あたり必要な症例数は 40 例、総症例 120 例となった。

1  
2  
3  
4  
5  
6  
7  
8  
9  
10  
11  
12  
13  
14  
15  
16  
17  
18  
19  
20  
21  
22  
23  
24  
25  
26  
27  
28  
29  
30  
31  
32  
33  
34  
35  
36  
37  
38  
39  
40  
41  
42  
43  
44  
45  
46  
47  
48  
49  
50  
51  
52  
53  
54  
55  
56  
57  
58  
59  
60

**11.3. 症例の取り扱い**

原則として登録された症例については、治験調整医師及び統計専門家が協議の上、症例の取り扱いを決定する。新たな問題が起こった場合の症例の取り扱いについても、治験調整医師及び統計専門家が協議の上決定する。

**11.4. データの取り扱い**

欠測値の補完は統計解析計画書にて規定する。疑義が生じた場合は、統計専門家と治験調整医師が協議の上決定する。

**11.5. 統計解析項目及び解析計画**

全ての症例において治験薬の投与が終了し、データが固定された後に解析を行う。全ての有効性評価において、最大の解析対象集団（FAS）における解析を主解析とし、副次的評価として治験実施計画書に合致した解析対象集団（PPS）における解析を行う。安全性の解析は、安全性解析対象集団における解析を実施する。

統計解析の詳細はデータ固定前に別途作成する統計解析計画書に規定する。

**11.5.1. 有効性の解析**

**11.5.1.1. 主要評価項目**

目的

3年時無再発生存期間について、MPA 単独群をコントロールとして、MPA+メトホルミン（750mg）、MPA+メトホルミン（1500mg）を比較し有効性の検証をする。

(1) 解析対象

主たる統計解析の対象群は FAS とする、PPS は FAS の裏づけ資料とするため、解析の項で示したような閉手順はとらず、それぞれの群で比較する。

(2) 解析方法

生存時間の推定：

各群それぞれの無再発生存曲線を Kaplan-Meier 法により推定し、3 年時無再発生存割合とその 95% 信頼区間を Greenwood の公式で求める。

比較検証：

MPA 単独群をコントロール、MPA+メトホルミン（750mg）、MPA+メトホルミン（1500mg）の 3 群について、次の閉手順で検定し検証していく。

閉手順：

- ① MPA 単独群と MPA+メトホルミン（750mg）及び MPA+メトホルミン（1500mg）をプールして Log-rank 検定を実施する。検証する仮説は、単独群に対しメトホルミンの薬効を示すことである。ここで有意ならば次の手順に行き、有意差がなければ終了する。
- ② MPA 単独群と MPA+メトホルミン（1500mg）について、Log-rank 検定を実施する。検証する仮説は、MPA 単独群に対し MPA+メトホルミン（1500mg）の有効性を示すことである。ここで有意ならば、次の手順に行き、有意差がなければ終了する。
- ③ MPA 単独群と MPA+メトホルミン（750mg）について、log-rank 検定を実施する。検証する仮説は、MPA 単独群に対し MPA+メトホルミン（750mg）の有効性を示すことである。ここで有意ならば、次の手順に行き、有意差がなければ終了する。
- ④ MPA+メトホルミン（750mg）と MPA+メトホルミン（1500mg）について、log-rank 検定を実施する。検証する仮説は、MPA+メトホルミン（750mg）に対し MPA+メトホルミン（1500mg）の有効性を示すことである。

#### 11.5.1.2. 副次評価項目

有効性の主要評価項目と同様に重要な有効性の評価項目として、MPA 単独群をコントロール、MPA+メトホルミン（750mg）、MPA+メトホルミン（1500mg）の 3 群の比較検討を行い、メルホトミンの有用性を確認する。

##### (1) 解析対象

主たる解析は FAS とし、PPS は FAS の裏づけ資料とする。

##### (2) 評価項目

第 1 期【MPA 治療：36 週間】治療期の完全寛解

第 2 期【維持治療期：36 週以降、治験終了まで】治療期での無再発生存期間と割合

インスリン抵抗性・BMI、妊娠率、妊娠・周産期予後

### (3) 解析方法

#### ① 第I期【MPA 治療期】治療期の完全寛解の奏功率

MPA 単独群をコントロール、MPA+メトホルミン（750mg）、MPA+メトホルミン（1500mg）の3群の第I期【MPA 治療期】での完全寛解までの期間、完全寛解率を Kaplan-Meier 法で推定し、3群それぞれの比較は Log-rank 検定で実施する。また MPA 単独群とメトホルミン併用群の治験継続の割合とその 95%信頼区間を求める。

#### ② 第II期【維持治療期：寛解判定から治験終了】での無再発生存期間と割合については Kaplan-Meier 法で推定し、3群それぞれの比較は Log-rank 検定で実施する。また年次ごとに無再発の割合のその 95%信頼区間を Greenwood の公式で求める。

#### ③ インスリン抵抗性・BMI

BMI は MPA 投与終了時、及び寛解後 120 週（30 か月）の評価・治験終了時の値を、治療前の値と比較し 3 群間で Paired T-test で比較する。HOMA-R は MPA 投与終了後 48 週（12 か月）後、120 週（30 か月）後、治験終了時の値を、治療前の値を混合効果モデルで使い、LS-mean で各群を比較する。BMI、HOMA-R とも、MPA 投与終了後 48 週（12 か月）後、120 週（30 か月）後、治験終了時に妊娠中は検査値が変動するため欠損値として扱う。

#### ④ 妊娠率

寛解例のうち、妊娠を希望した症例のうち、治験期間中に一度でも妊娠した症例の割合を求める。寛解から初回の妊娠成立までの期間を求める。

なお、本治験で妊娠率を計算する場合の妊娠の定義は、子宮内に胎嚢の確認できたものを妊娠と判断する。妊娠陽性反応のみ認める場合や、異所性妊娠は妊娠率の計算には入れない。

#### ⑤ 妊娠・周産期予後

妊娠例の転帰（流産・死産・生産、転帰週数）を確認。寛解例のうち妊娠を希望した症例のうち、生児を得た症例の割合を求める。寛解から生児獲得までの期間を求める。

また、必要があれば無再発生存期間については、割付因子の調整、層の調整など比例ハザード回帰を含む統計手法を使用して結果を示す。詳細は統計解析計画書に記載をする。

### 11.5.2. 安全性の評価

副次評価項目（Secondary endpoint）として、有害事象の発生割合を評価する。

## 有害事象発生割合

安全性解析集団を対象に、有害事象の発現例数、発現率及びその 95%信頼区間（正確）を算出する。

Grade3 以上の有害事象が発生した項目（神経毒性の場合は Grade2 以上）については発現例数、発現率及びその 95%信頼区間（正確）を算出する。有害事象の Grade 判定は、NCI-CTCAE v4.0 に従う。

### 11.5.3. 中間解析と治験の早期中止

本治験において中間解析は行わない。新たに得られた情報により安全性の観点から治験の継続に問題がある場合もしくは治験薬の有効性が期待できないことが明らかになった場合は、治験の早期中止を検討する。

### 11.6. 独立データモニタリング委員会

本治験では独立データモニタリング委員会を設置する。独立データモニタリング委員会は自ら治験を実施する者と独立した機関として設立され、本治験とは独立した立場である 3 人以上の専門家による委員で構成される。独立データモニタリング委員会は、患者の安全性を確保することを目的に、別途定める独立データモニタリング委員会運営手順に従い治験における安全性モニタリングを行い、その結果を踏まえて下記の点について自ら治験を実施する者に勧告する。

安全性の懸念による、治験デザインの変更または治験薬投与の中止詳細は独立データモニタリング委員会運営手順書にて定める。

### 11.7. 最終解析

追跡期間終了後、データが得られ症例が固定された後に解析を行う。統計解析責任者が「解析報告書」をまとめ、治験調整医師及び治験責任医師に提出する。

## 12. 治験実施計画書の遵守及び逸脱

- (1) 治験責任医師又は治験分担医師は、治験実施計画書から逸脱した行為を理由のいかんによらず全て記録する。
- (2) 被験者の緊急の危機を回避するためその他医療上やむを得ない理由により実施計画書から逸脱した場合、治験責任医師は、逸脱の内容及びその理由を記載した文書を実施医療機関の長に直ちに提

出するとともに、当該文書の内容を実施医療機関の長を経由して治験審査委員会に速やかに報告する。

### 13. 治験実施計画書、症例報告書又は解析計画に関する変更

#### 13.1. 治験実施計画書及び症例報告書の改訂

治験実施計画書及び症例報告書を改訂する場合には、以下の手順により行う。

- (1) 治験調整医師及び治験調整委員会は、改訂が必要と認めた場合には、治験責任医師に治験実施計画書改訂案、症例報告書改訂案及び、最新の添付文書、その他必要な資料・情報を提供する。
- (2) 治験調整医師及び治験調整委員会は、治験責任医師が前項により提供された治験実施計画書改訂案等の資料・情報を十分検討し、治験調整医師及び治験調整委員会と協議するのに必要な時間を治験責任医師に与える。
- (3) 治験調整医師及び治験調整委員会と協議した後、治験責任医師は治験実施計画書改訂版及び症例報告書用紙改訂を速やかに実施医療機関の長に提出し、実施医療機関の長を経由して速やかに治験審査委員会の承認を得る。
- (4) 治験審査委員会の意見に基づく実施医療機関の長の指示が治験調整医師及び治験調整委員会の許容できる範囲内で、治験実施計画書及び症例報告書用紙を修正する場合も同様の手順とする。

#### 13.2. 統計解析計画の変更

統計解析責任者は、統計解析計画書の内容を変更した場合、変更内容をすべて本治験の統計解析報告書に記載する。なお、統計解析計画書の変更は、その経緯を記録に残す。

### 14. 治験の中止、中断または終了

#### 14.1. 治験全体での中止または中断の基準

治験調整医師及び治験調整委員会は、以下の情報が得られ、治験全体の続行が困難であると考えられる時には、治験責任医師と治験全体の中止又は中断について協議のうえ、決定する。

- (1) 予期できない重篤な副作用の発生

- (2) 予期できる重篤な副作用の発生件数、発生頻度、発生条件等の発生傾向がインタビューフォーム・添付文書から予測できないことを示す情報
- (3) 重篤な有害事象のうち因果関係がないと判断されていたが、その後発生数、発生頻度、発生条件等の発生傾向から因果関係が否定できないと判断される情報
- (4) 副作用の発生数、発生頻度、発生条件等の発生傾向が著しく変化したことを示す研究報告
- (5) がんその他の重大な疾病、障害もしくは死亡が発生するおそれがあることを示す研究報告
- (6) 当該治験で有効性が認められないことを示唆する情報
- (7) 治験の対象となる疾患に対して効能もしくは効果を有していないことを示す情報
- (8) 治験薬と同一成分を含む市販医薬品について、製造、輸入又は販売の中止、回収、廃棄その他の保健衛生上の危害の発生又は拡大を防止するための措置の実施の情報

#### 14.2. 治験全体での中止又は中断する場合の手続き

治験調整医師または治験調整委員会は、他の治験責任医師と協議のうえ治験全体を中止又は中断する場合には、実施医療機関の長にその旨とその理由を詳細に速やかに文書で通知する。また、投与中の被験者に対して速やかにその旨を伝え、適切な治療への変更等の適切な処理を行うものとする。

#### 14.3. 個々の実施医療機関での治験を中止または中断する場合の手続き

治験責任医師は、治験を中止又は中断した場合には、実施医療機関の長に速やかにその旨を文書で通知するとともに、中止又は中断について文書で詳細に説明する。

治験調整医師は、治験責任医師が治験を中止又は中断した旨を通知してきた場合には、中止又は中断について詳細に説明された文書により当該治験に関与するすべての治験責任医師に速やかに文書で通知する。

#### 14.4. 治験の終了

治験責任医師は、治験終了後、実施医療機関の長に治験が終了した旨を文書で通知し、治験結果の概要を文書で報告する。

15. データマネジメント

15.1. データマネジメントの手順

データマネジメントに関する詳細な手順については、データマネジメント計画書に記載する。

15.2. データの収集

治験責任医師又は治験分担医師は、21 CFR Part 11、省令 GCP 及び ER/ES 指針の要件に対応した DATATRAK ONE を用い、症例報告書を作成する。治験責任医師又は治験分担医師は、症例報告書の記載内容の変更、修正又は追記に当たっては、DATATRAK ONE 上で行い、全て電子情報として記録する。なお、治験責任医師は、治験分担医師が症例報告書を作成した場合並びに治験協力者が原資料（原データ）から症例報告書に転記した場合には、当該症例報告書が提出される前にその内容について点検し、問題がないことを確認する。自ら治験を実施する者は、最終的に電子症例報告書（写）を電子媒体（CD-R 等）にて医療機関へ提供する。自ら治験を実施する者は、電子症例報告書（写）の見読性、保存性を担保する。

15.3. 症例報告書に直接記載され、かつ原資料（原データ）と解すべき資料の特定

本治験においては、以下の文書などを原資料（原データ）とする。

- (1) 被験者の同意及び被験者への情報提供に関する記録  
診療録、看護記録、臨床検査データ及び画像検査フィルム等症例報告書作成の基となった記録。なお、電子カルテに格納されたデータも原資料とみなす。
- (2) 治験薬投与に関する記録
- (3) 本治験に関連する指針上必要な治験に係る文書又は記録

症例報告書に記載されたデータのうち、以下に示す項目は症例報告書の記載をもって原資料（原データ）とする。ただし、診療録等に記載のある場合は、当該診療録等を原資料（原データ）とみなす。

- (1) 併用薬・併用療法の目的
- (2) 有害事象の程度、転帰（追跡調査時の結果を含む）、重篤度、本治験薬との因果関係の有無
- (3) 被験者の治験中止理由

(4) 治験責任医師又は治験分担医師のコメント

## 16. 原資料及びその他の記録の取扱い

### 16.1. 治験実施医療機関による記録の保存

GCP に規定される治験実施医療機関において保存すべき治験に係る文書又は記録は、病院長が次の日のうちいずれかの遅い日までの期間保存する。

- 1) 当該被験薬の当該効能・効果に係る製造販売承認日（開発が中止された場合には、開発中止が決定されてから 3 年が経過した日）
- 2) 治験の中止又は終了後 3 年が経過した日

治験責任医師は、治験実施医療機関又は治験審査委員会が保存すべき記録について保存が不要となった場合、治験実施医療機関に通知する。

### 16.2. 治験責任医師による記録の保存

GCP に規定される治験責任医師が保存すべき治験に係る文書又は記録は、適切と判断される保管場所において、次のうちいずれか遅い日までの期間保存する。

- 1) 当該被験薬の当該効能・効果に係る製造販売承認日から 5 年が経過した日（開発が中止された場合には開発中止が決定された日から 3 年が経過した日）。ただし、薬事法の規定により承認後の再審査を受けなければならない医薬品で、かつ再審査が終了するまでの期間が 5 年を超えるものについては、再審査が終了する日。
- 2) 治験の中止又は終了後 3 年が経過した日。

### 16.3. 病理標本の取扱い

中央病理診断を行うため、治験調整事務局に病理標本を送付する。中央病理診断は手順書に従い行う。検討が必要な検体については中央病理判定委員会を年 1 回開催、標本をレビューして中央病理診断とする。実施医療機関と中央病理判定委員会の診断結果が異なる場合の取扱いは **6.4.4.** 及び **10.1.3.**に記載のとおりとする。

施設からの標本提供にあたっては、提出元となる各施設が定める院内規程・手続きに従うことを原則とする。提出する標本は、可能であれば複製したものを送付する。標本は登録番号と採取時期（登録

1  
2  
3  
4  
5  
6  
7  
8  
9  
10  
11  
12  
13  
14  
15  
16  
17  
18  
19  
20  
21  
22  
23  
24  
25  
26  
27  
28  
29  
30  
31  
32  
33  
34  
35  
36  
37  
38  
39  
40  
41  
42  
43  
44  
45  
46  
47  
48  
49  
50  
51  
52  
53  
54  
55  
56  
57  
58  
59  
60

時、8 週、16 週、24 週、32 週、3 年、再発時等）のみ記載し診療録番号、氏名等は記載しない。標本は治験終了まで治験調整事務局で保管する。標本提供の手順は、別途作成する手順書に従う。

当該標本が、登録施設以外の医療施設等からの借用標本で複製不能であり、施設における組織再採取が適応でないために借用標本の「又貸し」を要する場合も、これを行うか否かについて当該施設の院内規程がまず優先されるべきであることは同様である。院内規程が明確でない場合、病理中央診断が終了（診断固定完了）後に返却することを前提として、治験責任医師の責任において借用標本の提出を受けることを妨げるものではない。院外へ標本の貸出ができない場合や、借用標本が不十分であると施設で判断された場合は、施設にて組織を再採取し標本作製を行う。

標本は①MPA 投与終了後（登録時、MPA 投与 8 週、MPA 投与 16 週、MPA 投与 24 週、MPA 投与 32 週の標本をまとめて送付）、②第Ⅱ期 120 週時（登録後 3 年時）、③再発疑い及び再発時に送付する。

詳細な手順については、別途手順書に記載する。

**17. 原資料の直接閲覧**

治験実施医療機関の長及び治験責任医師は、モニタリング、監査及び治験審査委員会又は規制当局による調査の際に、原資料等すべての記録を閲覧できることを保証する。治験が適切に実施されていること及びデータの信頼性が十分に確保されていることを確認する。直接閲覧の方法、実施時期についてはモニタリング手順書に別途定める。

**18. 治験の品質管理及び品質保証**

**18.1. 品質管理**

モニターがモニタリングを行い、治験実施医療機関において治験が治験実施計画書及びGCPを遵守して適切に行われていることを確認する。また、原資料（原データ）等の治験関連記録を直接閲覧し、症例報告書その他の報告書の記載内容が正確であることを確認する。モニター、データマネジメント担当者及び統計解析担当者が、データ取扱いの各段階をそれぞれ点検・確認する。

## 18.2. 品質保証

治験の実施並びにデータ作成、記録及び報告が治験実施計画書及び GCP を遵守して適切に行われていること保証するために、モニタリングを担当する部門を含む治験に関わる部門から独立した監査担当者が、治験実施医療機関及び治験の実施に係わるその他の施設において監査を行い、品質管理が適切に行われていることを確認する。

## 19. 倫理及び GCP

### (1) 遵守すべき規制要件

本治験の実施に際しては「ヘルシンキ宣言」に基づく倫理的原則、「医薬品の臨床試験の実施の基準に関する省令」（GCP）、及びその他の関連する規制要件を遵守するものとする。

### (2) 人権への配慮（個人情報の保護）

治験実施に係る生データ類および同意書等を取り扱う際には、被験者の秘密保護に十分配慮する。治験結果を公表する場合には、被験者を特定できる情報を含めないようにする。本治験の目的以外に、治験で得られた被験者のデータを使用しない。

あらかじめ被験者の同意を得ないで、同意説明文書で特定された利用目的の達成に必要な範囲を超えて、個人情報を取り扱わない。

### (3) 安全性・不利益への配慮

有害事象発生時は、速やかに適切な診察及び処置を行う。夜間休日でも迅速に対応できる体制を取る。有徳な有害事象が発生した場合は、集中治療室で対応する。

## 20. 治験審査委員会

本治験の実施に先立ち、実施医療機関の治験審査委員会は、本治験の倫理的、科学的及び医学的妥当性を審査する。本治験は、治験審査委員会の承認を得た後に実施する。治験審査委員会の審議結果が「修正の上で承認する」であった場合には、審議結果に基づいて実施計画書又は症例報告書、同意説明文書等を修正し承認した後、本治験を実施する。また、治験審査委員会は少なくとも 1 年に 1 回以上の頻度で本治験が適切に実施されているか否かを継続的に審査する。

21. 健康被害補償及び保険

21.1. 健康被害の補償

本治験に参加した結果として被験者に健康被害が生じた場合、実施医療機関はその治療に関する医療体制の提供など必要かつ適切な処置を行う。本治験に起因する健康被害により生じた賠償責任、補償責任への対応として、健康被害の補償のための手順書に従い、医師主導治験保険に加入する。

補償の範囲、条件等は契約する保険の内容に準ずるものとする。なお、健康被害が被験者の故意または過失によるものと判明した場合、補償の対象外となることがある。

21.2. 賠償保険への加入

賠償責任に備え、治験責任医師及び治験分担医師は医師賠償責任保険に加入する。さらに、実施医療機関においても病院賠償責任保険等に加入する。

22. 金銭の支払い

被験者に対して、負担軽減費等の費用を支払う場合は、各治験実施医療機関が別途定める規則に従い、被験者に支払うものとする。

23. 研究結果の発表

主たる論文、学会発表は、最終解析終了後に独立データモニタリング委員会の承認を経て、専門誌（英文）に投稿、あるいは専門学会に発表する。

23.1. 論文発表の authorship 等に関する取り決め

原則として論文発表に関する authorship は以下のとおりとする。

治験結果の公表論文の筆頭著者は治験調整医師（当該プロトコルの発案者）、以下症例登録数が最も多かった施設の実務担当者もしくは代表者（該当施設内の筆頭者の選択は、その施設の判断による。ただし、研究に最も貢献した者を原則とする）、統計解析責任者、中央病理事務局責任者とする。それ以下は、論文の投稿規定による制限に従い、登録数の多い順に選び共著者とする。また最終著者は治験調整事務局とする。

すべての共著者は、投稿前に review し、発表内容に合意した者のみとする。内容に関して議論しても合意が得られない場合、治験調整医師はその研究者を共著者に含めないことができる。

学会発表は複数回に及ぶ可能性があり、1.治験調整医師、2.症例登録数が最も多かった施設の代表者、3.登録数が多い順の施設代表者の優先順位で発表する権利を与える。

## 23.2. データ公開について

ヘルシンキ宣言に従い、本治験に関するデータの公開を行うものとする。なお、公開の範囲は、以下の通りとする。

jRCT に、治験の概要を公開する。治験実施計画書、同意説明文書、統計解析計画書等も公開する。治験の結果および総括報告書については、試験終了後に公開する。

## 24. 資金及び利益の衝突

本治験は AMED との契約に基づいて実施され、治験調整医師及び治験責任医師により公正に行われる。また、治験薬は日本新薬株式会社より有償にて提供される。本治験の計画・実施・報告において治験の結果及び結果の解釈に影響を及ぼすような「起こりえる利益の衝突」は存在しないこと、また治験の実施が被験者の権利・利益を損ねることがないことを確認する。

## 25. 治験実施体制

別紙 1 を参照。

## 26. 参考資料・文献リスト

1. 日本産科婦人科学会婦人科腫瘍委員会報告：2014 年度子宮体癌患者年報. 日産婦誌 2016; 68:1117-1160.
2. Bianchini F, Kaaks R, Vainio H: Overweight, obesity, and cancer risk. *Lancet Oncol* 2002; 3:565–74.
3. Renehan AG, Tyson M, Egger M, et al: Body-mass index and incidence of cancer: a systematic review and meta-analysis of prospective observational studies. *Lancet* 2008; 371:569–78.
4. Liao C, Zhang D, Mungo C, Tompkins DA, Zeidan AM (2014) Is diabetes mellitus associated with increased incidence and disease-specific mortality in endometrial cancer? A systematic review and meta-analysis of cohort studies. *Gynecol Oncol* 135:163-171
5. Lukanova A, Zeleniuch-Jacquotte A, Lundin E, et al: Prediagnostic levels of C-peptide, IGF-I, IGFBP -1, -2 and -3 and risk of endometrial cancer. *Int J Cancer* 2004; 108:262-8.
6. Cust AE, Allen NE, Rinaldi S, et al: Serum levels of C-peptide, IGFBP-1 and IGFBP-2 and endometrial cancer risk; results from the European prospective investigation into cancer and nutrition. *Int J Cancer* 2007; 120:2656-64.
7. Calle EE, Kaaks R: Overweight, obesity and cancer: epidemiological evidence and proposed mechanisms. *Nat Rev Cancer* 2004; 4:579-91.
8. Sharma D, Saxena NK, Vertino PM, et al: Leptin promotes the proliferative response and invasiveness in human endometrial cancer cells by activating multiple signal-transduction pathways. *Endocr Relat Cancer* 2006; 13:629-40.
9. Nevadunsky NS, Van Arsdale A, Strickler H D et al. Obesity and age at diagnosis of endometrial cancer. *Obstet Gynecol*; 124:300-6.
10. Mitsuhashi A, Uehara T, Hanawa S, Shozu M. Prospective evaluation of abnormal glucose metabolism and insulin resistance in patients with atypical endometrial hyperplasia and endometrial cancer. *Support Care Cancer*. 2017 ;25 (5) :1495-1501.
11. Trimble CL, Kauderer J, Zaino R, et al: Concurrent endometrial carcinoma in women with a biopsy diagnosis of atypical endometrial hyperplasia. *Cancer* 2006; 106:812-9.
12. 日本婦人科腫瘍学会編: 子宮体がん治療ガイドライン 2018 年版. 金原出版, 2018

13. Gallos ID, Yap J, Rajkhowa M, et al: Regression, relapse, and live birth rates with fertility-sparing therapy for endometrial cancer and atypical complex endometrial hyperplasia: a systematic review and metaanalysis. *Am J Obstet Gynecol* 2012; 207:266 e1-266 e12.
14. Gunderson CC, Fader AN, Carson KA, Bristow RE. Oncologic and reproductive outcomes with progestin therapy in women with endometrial hyperplasia and grade 1 adenocarcinoma: a systematic review. *Gynecol Oncol* 2012; **125**: 477-82.
15. Ushijima K, Yahata H, Yoshikawa H, et al: Multicenter phase II study of fertility-sparing treatment with medroxyprogesterone acetate for endometrial carcinoma and atypical hyperplasia in young women. *J Clin Oncol* 2007; 25:2798-803.
16. Kaku T, Yoshikawa H, Tsuda H, et al: Conservative therapy for adenocarcinoma and atypical endometrial hyperplasia of the endometrium in young women: central pathologic review and treatment outcome. *Cancer Lett* 2001; 167:39-48.
17. Ota T, Yoshida M, Kimura M, et al: Clinicopathologic study of uterine endometrial carcinoma in young women aged 40 years and younger. *Int J Gynecol Cancer* 2005; 15:657-62.
18. Niwa K, Tagami K, Lian Z, et al: Outcome of fertility-preserving treatment in young women with endometrial carcinomas. *BJOG* 2005; 112:317-20.
19. Yahata T, Fujita K, Aoki Y, et al: Long-term conservative therapy for endometrial adenocarcinoma in young women. *Hum Reprod* 2006; 21:1070-5.
20. Minaguchi T, Nakagawa S, Takazawa Y, et al: Combined phospho-Akt and PTEN expressions associated with post-treatment hysterectomy after conservative progestin therapy in complex atypical hyperplasia and stage Ia, G1 adenocarcinoma of the endometrium. *Cancer Letters* 2007; 248:112-22.
21. Yamazawa K, Hirai M, Fujito A, et al: Fertility-preserving treatment with progestin, and pathological criteria to predict responses, in young women with endometrial cancer. *Human Reprod* 2007; 22:1953-8.
22. Fujiwara H, Jobo T, Takei Y, et al: Fertility-sparing treatment using medroxyprogesterone acetate for endometrial carcinoma. *Oncol Lett* 2012; 3:1002-6.
23. Salpeter SR, Buckley NS, Kahn JA, et al: Meta-analysis: metformin treatment in persons at risk for diabetes mellitus. *Am J Med* 2008; 121:149-57 e2.
24. Owen MR, Doran E, Halestrap AP: Evidence that metformin exerts its anti-diabetic effects through inhibition of complex 1 of the mitochondrial respiratory chain. *Biochem J* 2000; 348 Pt 3:607-14.

1  
2  
3  
4  
5  
6  
7  
8  
9  
10  
11  
12  
13  
14  
15  
16  
17  
18  
19  
20  
21  
22  
23  
24  
25  
26  
27  
28  
29  
30  
31  
32  
33  
34  
35  
36  
37  
38  
39  
40  
41  
42  
43  
44  
45  
46  
47  
48  
49  
50  
51  
52  
53  
54  
55  
56  
57  
58  
59  
60

25. Giannarelli R, Aragona M, Coppelli A, et al: Reducing insulin resistance with metformin: the evidence today. *Diabetes Metab* 2003; 29:6S28-35.

26. Matthaei S, Reibold JP, Hamann A, et al: In vivo metformin treatment ameliorates insulin resistance: evidence for potentiation of insulin-induced translocation and increased functional activity of glucose transporters in obese (fa/fa) Zucker rat adipocytes. *Endocrinology* 1993; 133:304-11.

27. Musi N, Hirshman MF, Nygren J, et al: Metformin increases AMP-activated protein kinase activity in skeletal muscle of subjects with type 2 diabetes. *Diabetes* 2002; 51:2074-81.

28. Evans JMM, Donnelly LA, Emslie-Smith AM, et al: Metformin and reduced risk of cancer in diabetic patients. *BMJ* 2005; 330:1304-5

29. Quinn BJ, Kitagawa H, Memmott RM, Gills JJ, Dennis PA. Repositioning metformin for cancer prevention and treatment. *Trends Endocrinol Metab.* 2013;24: 469-80.

30. Pernicova I, Korbonits M. Metformin--mode of action and clinical implications for diabetes and cancer. *Nat Rev Endocrinol* 2014; 10:143-56.

31. Jiralerspong S, Palla SL, Giordano SH, et al: Metformin and pathologic complete responses to neoadjuvant chemotherapy in diabetic patients with breast cancer. *J Clin Oncol* 2009; 27:3297-302.

32. Mitsuhashi A, Kiyokawa T, Sato Y, Shozu M. Effects of metformin on endometrial cancer cell growth in vivo: a preoperative prospective trial. *Cancer* 2014; 120: 2986-95.

33. Ko EM, Walter P, Jackson A, et al. Metformin is associated with improved survival in endometrial cancer. *Gynecol Oncol.* 2014; 132:438-42.

34. Nestler JE: Metformin for the Treatment of the Polycystic Ovary Syndrome. *N Engl J Med* 2008; 358:47-54.

35. Mitsuhashi A, et al. A phase II study of medroxyprogesterone acetate plus metformin as fertility-sparing treatment for atypical endometrial hyperplasia and endometrial cancer. *Ann Oncol* 2016; 27:262-266.

【千葉大学医学部附属病院】治験実施計画書番号：Chiba-Met003 1.0 版（2019 年 5 月 24 日）  
説明文書・同意書 1.0 版（2019 年 5 月 24 日）

よくお読みください

被験者用

患者さんへ

子宮内膜異型増殖症・子宮体癌に対する  
メドロキシプロゲステロンとメトホルミンの  
併用妊孕性温存療法の用量反応性試験  
FELICIA Trial

～説明および同意文書～

この冊子には、「メトホルミン」という薬の、効果や安全性を確かめるための臨床試験（<sup>ちけん</sup>治験）についての詳しい説明が書かれています。

この冊子をよくお読みになり、この治験の目的や方法、お薬について十分に理解されたうえで、治験に参加されるか否かを決めてください。担当医師の説明やこの説明文書の中で、わからないことや心配なことなどがありましたら、どんなことでも遠慮なくお尋ねください。

目次

1. 治験<sup>ちけん</sup>とは？ ..... 3

2. 子宮内膜異型増殖症・子宮体癌とメトホルミン(グリコラン<sup>®</sup>錠)について .... 4

3. 治験の目的 ..... 6

4. 対象となる患者さん・対象とならない患者さん ..... 6

5. この治験の進め方 ..... 7

6. 治験に参加する予定人数 ..... 15

7. 治験の利益・不利益 ..... 15

8. この治験に参加しない場合の、他の治療法 ..... 16

9. 治験への参加を中止する場合について ..... 16

10. 新たに重要な情報が得られた場合について ..... 17

11. 治験に関連した健康被害の治療について ..... 17

12. 治験に参加された場合の費用について ..... 18

13. カルテなどの医療記録の閲覧と秘密の保全について ..... 19

14. 治験に参加いただくことは自由です ..... 20

15. 患者さんに守っていただきたいことについて ..... 20

16. 知的財産権と利益相反について ..... 21

17. 治験を審査する委員会 ..... 21

18. 治験に関する相談窓口 ..... 22

## 1. 治験とは？

新しい医薬品が世の中に出て、多くの患者さんに使われるためには、国から承認を得ることが必要とされています。そのため、その効果と安全性を何段階にもわたって慎重に調べます。まずは試験管での実験や動物実験によって医薬品の候補の効果と安全性が確認されます。その後、健康な方や患者さんに使っていただき、効果や安全性を詳しく調べます。

このように、開発の最終段階において、人を対象に効果や安全性を確かめ、厚生労働省に「医薬品」として認めてもらうため、申請の資料を集めることを目的とした試験を「治験」、その治験で使われるお薬を「治験薬」と呼んでいます。

### 新しいくすりができるまで

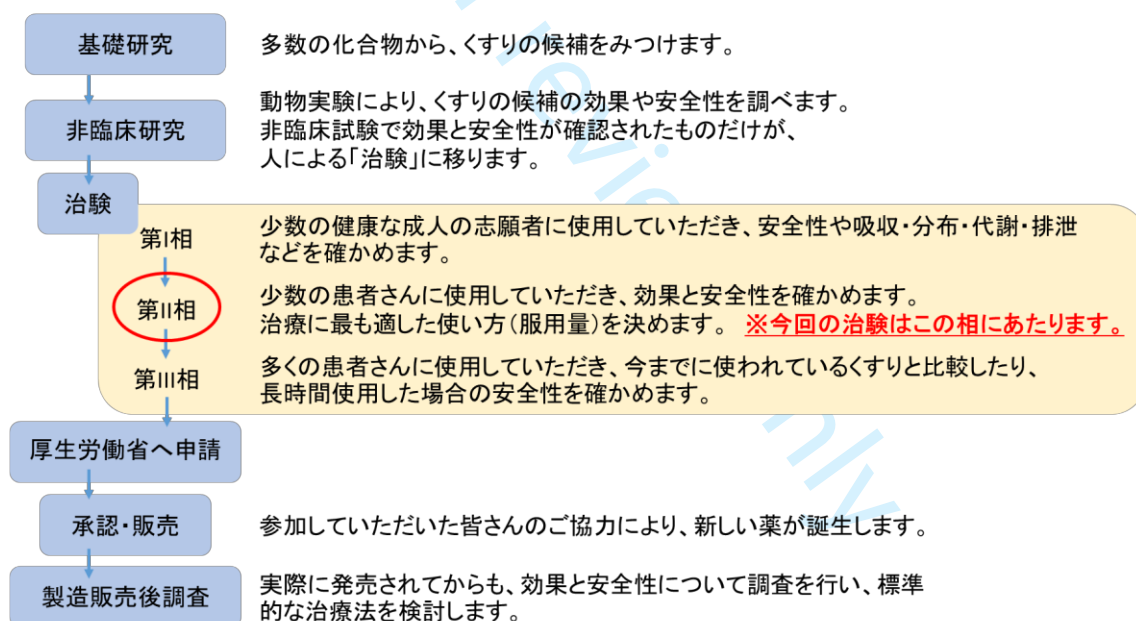

治験は、一般の治療と異なり、研究的な側面があります。そのため、治験は参加された方の安全や人権を守るために、「医薬品、医療機器等の品質、有効性及び安全性の確保等に関する法律（略称：薬機法）」という法律と、厚生労働省が定めた「医薬品の臨床試験の実施の基準に関する省令（GCP）」に基づいて行われます。また、当院の治験審査委員会（治験について審査する委員会）で、この治験の内容に問題がないか、患者さんの人権が十分に守られているか事前に審議されたいうで、治験の実施が認められています。

## 2. 子宮内膜異型増殖症・子宮体癌とメトホルミン(グリコラン<sup>®</sup>錠)について

### ＜子宮内膜異型増殖症・子宮体癌について＞

子宮内膜異型増殖症とは、子宮内膜という組織が厚く増殖し、子宮内膜の細胞に異型が認められる疾患です。子宮体癌の前がん状態と考えられており、子宮内膜異型増殖症の 4 割程度は、すでに子宮体癌を合併しているといわれています。

子宮体癌は、子宮体部に発生したがんで、そのほとんどはホルモンの作用を受けて月経を起こす子宮内膜から発生するため、子宮内膜癌とも呼ばれます。

### ＜標準的な治療方法＞

子宮内膜異型増殖症は、子宮温存療法を希望される場合はメドロキシプロゲステロン（MPA）を使った治療が行われますが、子宮温存療法を希望しない場合は、手術が標準治療となっています。

子宮体癌の治療の主体は、手術療法です。しかし、子宮温存療法を希望され、高分化型の類内膜癌でがん細胞が子宮内膜にとどまっている場合に限って、MPA を使った子宮温存療法が許容されています。

## ＜標準治療の問題点＞

MPA 療法は、子宮の温存を希望する患者さんに対し、現時点で一般的に行われる治療法ですが、一旦がんがなくなった後に再発したり、再発を抑える期間が十分でないという報告もあります。また、わが国で行われた臨床試験の結果から 22 人の患者さんが参加されて MPA 療法を受けられましたが、治療開始から 3 年後には 3 分の 2 の患者さんが再発し手術を受けられたという報告があります。多数の温存療法の成績をまとめた論文によると、ホルモン治療で子宮内膜異型増殖症では 85%ほど一旦病変がなくなりますが、そのうち 30%近く再発します。子宮体癌では 60-80%ほど病変がなくなりますが、そのうち 40%ほど再発すると報告されています。このように、子宮温存療法は現在の治療方法だけでは十分とはいえない現状があります。

## ＜治験薬について＞

この治験で使用する薬（治験薬）は「メトホルミン（商品名：グリコラン<sup>®</sup>錠）」といいます。メトホルミンは世界で 50 年以上前から糖尿病治療薬の第一選択薬として一般に広く使用されています。食事や運動療法後、最初に使われる薬剤で、海外では糖尿病の予防にも使われています。

近年、メトホルミンを服用している糖尿病患者さんは、服用していない人に比較してがんの発生が少ないことが報告されています。また、メトホルミンは、がん細胞を使った実験で、がんの増殖を抑える作用が報告されました。また、メトホルミンは<sup>たのうほう</sup>多嚢胞卵巣症候群（PCOS）の患者さんの不妊治療のさい、排卵誘発剤としても使用されており、排卵誘発や妊娠率の改善も期待されています。

子宮体癌の子宮温存療法では、従来の MPA 療法にメトホルミンを同時に使用したところ、一旦がんが消えたあとの再発が少なくなったという報告があります。ただ、この効果はまだ十分に証明されていません。

### 3. 治験の目的

この治験の目的は、子宮温存を希望する子宮内膜異型増殖症・子宮体癌の患者さんに対し MPA とメトホルミンを併用する新しい治療法において、メトホルミンの適切な用量を調べ、有効性及び安全性を確認することです。

### 4. 対象となる患者さん・対象とならない患者さん

今回の治験では、次の全ての事項に該当する患者さんにご参加をお願いしています。

- ① 子宮体癌または子宮内膜異型増殖症で、子宮温存療法の適応となる方
- ② 同意取得時の年齢が 20 歳以上 42 歳以下の方
- ③ 全身状態が良好な方
- ④ 高用量黄体ホルモンによる治療など、子宮体癌または子宮内膜異型増殖症の治療を受けたことがない方
- ⑤ 登録前の検査値が基準値範囲である方
- ⑥ 治験で使用する薬剤（MPA、メトホルミン）に対してアレルギー反応がない方
- ⑦ 治験参加について、ご本人より文書で同意が得られている方

一方、次のいずれかの事項に該当する患者さんはご参加いただけません。

- ① 治験で使用する薬剤（MPA、メトホルミン）が使用できない方
  - ・乳酸アシドーシスを起こしやすい方
  - ・重症ケトーシス、糖尿病性昏睡または前昏睡、Ⅰ型糖尿病の方
  - ・重症感染症、手術前後、重篤な外傷のある方
  - ・栄養不良状態、飢餓状態、衰弱状態、脳下垂体機能不全または副腎機能不全の方
  - ・妊婦または妊娠している可能性のある女性
  - ・本治療薬剤に過敏症の経験がある方
  - ・これまで血栓ができたことがある方

【千葉大学医学部附属病院】治験実施計画書番号：Chiba-Met003 1.0 版（2019 年 5 月 24 日）  
説明文書・同意書 1.0 版（2019 年 5 月 24 日）

- 診断未確定の性器出血、尿路出血、乳房病変のある方
  - 重篤な肝障害のある方
  - 高カルシウム血症と診断されている方
- ② 精神病または精神症状を有する方
  - ③ コントロール不良の糖尿病の方
  - ④ メトホルミンを服用している糖尿病の方（食事・運動療法、メトホルミン以外の内服薬の服用は可）
  - ⑤ 活動性の重複癌を有する方
  - ⑥ ステロイド剤の継続的な全身投与（内服または静脈内）をうけている方
  - ⑦ その他、主治医が不適格と判断した方

治験の参加に同意をいただいた後、詳しい検査を行い、治験にご参加いただけるかを判断させていただきます。

そのため、同意をいただいた後でも治験に参加していただけなくなる場合や、治験が始まった後でも医師の判断により治験を中止させていただく場合がありますので、ご了承ください。

## 5. この治験の進め方

この治験は、MPA とメトホルミンを併用するⅠ期と、メトホルミンのみを服用するⅡ期に分けられます。

治験に登録された 120 名の患者さんを以下の 3 つの群にランダムに割り当て、治験を開始します。どの群になるかは、事前には分かりません。

- A 群：MPA 単独群（40 名） ※この群では、メトホルミンを服用しません。
- B 群：MPA＋メトホルミン 750mg 投与群（40 名）
- C 群：MPA＋メトホルミン 1500mg 投与群（40 名）

第Ⅰ期では、4週間ごとに来院していただき、定められた検査・診察を受けていただきます。8 週間ごとに子宮内膜組織診を行い、病変の消失を観察します。32 週目に行う検査で病変が消失した場合は、寛解と判断され、第Ⅱ期に移行します。（36 週の来院時に検査結果をお伝えします。）この検査で寛解していないと判断された場合は、治験を中止していただきます。

第Ⅱ期は、36 週目から始まります。第Ⅰ期と同じように、処方された薬を持ち帰り、忘れないように服用を続けてください。第Ⅱ期では、第Ⅰ期で処方されていた MPA は服薬しませんが、必要に応じて月経コントロール薬を服用していただきます。妊娠を希望する場合は月経コントロールを行いませんので、担当医にお伝えください。妊娠された場合は出産するまで、妊娠を希望しない場合や流産などの場合は本治験の終了（最長 5.5 年）まで、あなたが治験への参加を取りやめない限り治験を継続します。

この治験の流れを以下に示します。

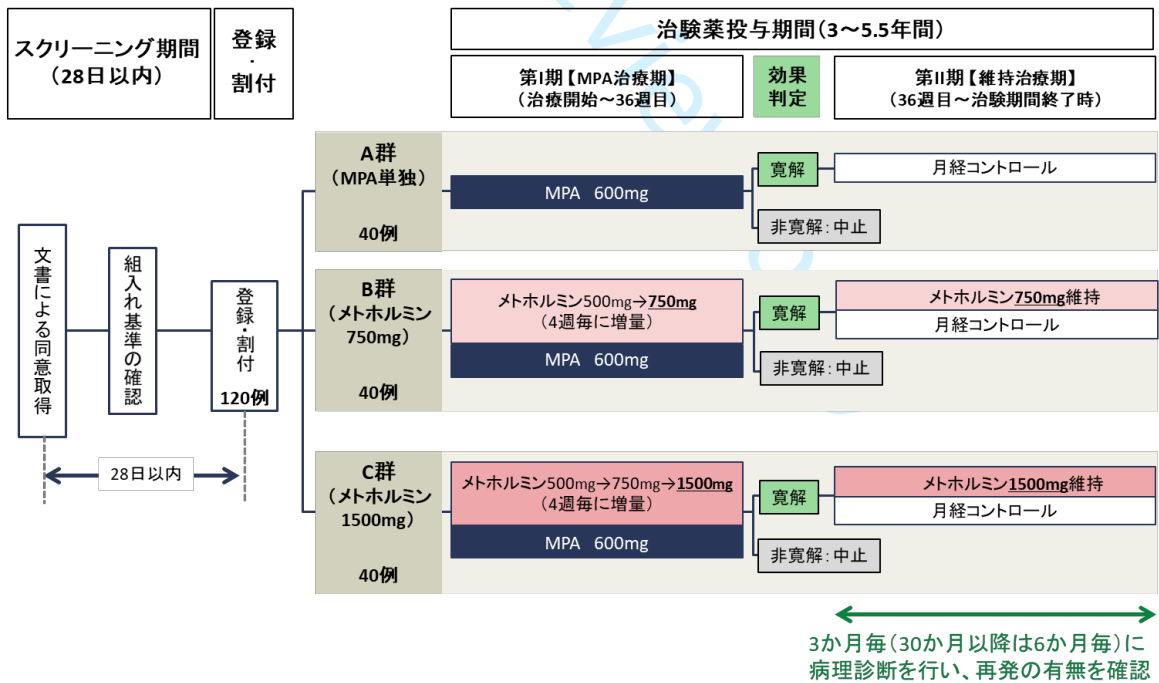

## 各群の進め方

### 【A群：MPA単独群（メトホルミン非投与群）】

#### ➤ 第Ⅰ期 治療開始から36週まで

A群に割り当てられた方は、MPAを、処方された翌日の朝から服用していただきます。

MPAの用量は1日に200mg×3回、合計600mgです。

4週ごとに来院していただきますが、来院時に処方される薬を持ち帰り、忘れないように服用を続けてください。もし飲み忘れてしまった場合は、お渡しする「服薬日誌」に記載してください。

32週目の検査で、病変が消失したかどうかを確認します。36週来院時に結果をお伝えします。この時点で消失が認められれば「寛解」と判定し、寛解した患者さんは第Ⅱ期の治療に移行していただきます。

#### ➤ 第Ⅱ期 36週以降、最長5.5年まで

妊娠を希望されない場合は、必要に応じ、無排卵・月経不順を改善するためにピルなどのホルモン剤を服用し月経コントロールを行います。妊娠を希望される患者さんは月経コントロールを行いませんので、担当医にお伝えください。

### 【B群：MPA＋メトホルミン750mg群】

#### ➤ 第Ⅰ期 治療開始から36週まで

MPAとメトホルミンを、処方された翌日の朝から服用していただきます。

MPAを1日に200mg×3回、合計600mgを服用します。

メトホルミン（グリコラン錠250mg）を、下記の表1に従い、有害事象がないか確認し、1ヶ月後に増量します。有害事象が発生した場合はお薬の服用をお休みしたり、用量段階を下げ減量して服用していただく場合がありますので、担当医の指示に従って服用してください。

4週ごとに来院していただきますが、来院時に処方される薬を持ち帰り、忘れないように服用を続けてください。もし飲み忘れてしまった場合は、お渡しする「服薬日誌」に記載してください。

32週目の検査で、病変が消失したかどうかを確認します。36週来院時に検査の結果をお伝えします。この時点で消失が認められれば「寛解」と判定し、寛解した患者さんは第Ⅱ期の治療に移行していただきます。

表1 B群のメトホルミン服用調節

| 用量調節段階 | メトホルミン投与量 | 1回服用量×回数   |
|--------|-----------|------------|
| 1段階    | 500mg     | 250mg×1日2回 |
| 2段階    | 750mg     | 250mg×1日3回 |

- 第Ⅱ期 36週以降、最長5.5年まで
- 妊娠を希望されない場合は、必要に応じ、無排卵・月経不順を改善するためにピルなどのホルモン剤を服用し月経コントロールを行います。妊娠を希望される患者さんは月経コントロールを行いませんので、担当医にお伝えください。
- メトホルミンの服用は、第Ⅰ期と同じ用量で続けていただきます。B群の患者さんは最大投与量を750mgとして、治験終了あるいは、再発などで試験中止となるまで服用を継続します。妊娠を希望される場合、メトホルミンは妊娠が分かった時点で服用を中断します。妊娠の可能性があると分かったら、担当医までお知らせください。

【C群：MPA＋メトホルミン1500mg群】

- 第Ⅰ期 治療開始から36週まで
- MPAとメトホルミンを、処方された翌日の朝から服用していただきます。MPAを1日に200mg×3回、合計600mgを服用します。
- メトホルミン（グリコラン錠250mg）を、下記の表2に従い、有害事象がないか確認しながら1ヶ月ごとに増量します。有害事象が発生した場合はお薬の服用をお休みしたり、用量段階を下げて減量して服用していただく場合があるので、担当医の指示に従って服用してください。

【千葉大学医学部附属病院】治験実施計画書番号：Chiba-Met003 1.0 版（2019 年 5 月 24 日）  
 説明文書・同意書 1.0 版（2019 年 5 月 24 日）

表2 C群のメトホルミン服用調節

| 用量調節段階 | メトホルミン投与量 | 1回服用量×回数   |
|--------|-----------|------------|
| 1段階    | 500mg     | 250mg×1日2回 |
| 2段階    | 750mg     | 250mg×1日3回 |
| 3段階    | 1500mg    | 500mg×1日3回 |

➤ 第Ⅱ期 32週以降、最長5.5年まで

妊娠を希望されない場合は、必要に応じ、無排卵・月経不順を改善するためにピルなどのホルモン剤を服用し月経コントロールを行います。妊娠を希望される患者さんは月経コントロールを行いませんので、担当医にお伝えください。

メトホルミンを第Ⅰ期と同じ用量で続けていただきます。C群の患者さんは最大投与量を1500mgとして、治験終了あるいは、再発などで試験中止となるまで服用を継続します。妊娠を希望される場合、メトホルミンは妊娠が分かった時点で服用を中断します。妊娠の可能性があると分かったら、担当医までお知らせください。

## メトホルミンを中断する場合や併用注意のお薬について

B群もしくはC群に割り当てられて、メトホルミンを服用する患者さんは次に該当する場合は一旦服用を中断して、担当医に報告してください。症状が改善したら再開していただきます。

- ① 食事を抜いたとき、食事が不規則または食事が十分に摂れていないとき
- ② 発熱を認める場合
- ③ 重症の感染症や外傷の場合
- ④ 下痢・嘔吐などの胃腸障害で脱水の危険がある場合
- ⑤ 過度のアルコール摂取をした場合
- ⑥ 激しい筋肉運動をした場合
- ⑦ コード造影剤を用いた検査が予定されている場合
- ⑧ 体調不良を認める場合

1  
2  
3  
4  
5  
6  
7  
8  
9  
10  
11  
12  
13  
14  
15  
16  
17  
18  
19  
20  
21  
22  
23  
24  
25  
26  
27  
28  
29  
30  
31  
32  
33  
34  
35  
36  
37  
38  
39  
40  
41  
42  
43  
44  
45  
46  
47  
48  
49  
50  
51  
52  
53  
54  
55  
56  
57  
58  
59  
60

他の診療科や医療機関などから他のお薬を処方された場合、併用に注意する  
場合があるので、治験に参加していることを伝え、医師に確認してください。プリ  
モボラン等のタンパク同化ステロイド、アスピリン等のサリチル酸剤、インデラ  
ル等のプロプラノロールβ遮断剤などは血糖下降作用を増強させることがあり注  
意が必要とされます。腎臓に影響する薬剤などを服用する場合も一旦メトホルミ  
ンの服用は中断していただきます。

本試験では MPA 服用中の血栓予防にアスピリンを少量併用することがありま  
す。メトホルミンとの併用に注意するお薬ですが、少量であり問題ないと考えま  
す。

peer review only

【千葉大学医学部附属病院】治験実施計画書番号：Chiba-Met003 1.0 版（2019 年 5 月 24 日）  
 説明文書・同意書 1.0 版（2019 年 5 月 24 日）

## 検査スケジュール

検査等のスケジュールを表 3、表 4 に示します。

表 3 治験スケジュール（第Ⅰ期：MPA 治療期）

| 観察時期                  | スクリーニング<br>登録前  | MPA治療期（0～36週）   |                 |                 |     | 中止<br>時 |
|-----------------------|-----------------|-----------------|-----------------|-----------------|-----|---------|
|                       |                 | 0週              | 4、12、<br>20、28週 | 8、16、<br>24、32週 | 36週 |         |
| 許容範囲（日）               | -28             | +14             | -7～+14          | -7～+14          | -21 | +14     |
| 文書による同意               | ●               |                 |                 |                 |     |         |
| 登録・割付                 |                 | ●               |                 |                 |     |         |
| 治験薬・併用薬の処方            |                 | ● <sup>*1</sup> | ●               | ●               |     |         |
| 患者背景                  | ●               |                 |                 |                 |     |         |
| 身体所見                  | ●               |                 |                 | ●               |     | ●       |
| 服薬状況確認                |                 |                 | ●               | ●               | ●   | ●       |
| 子宮内膜組織診<br>（麻酔下全面搔爬術） | ●               |                 |                 | ●               |     |         |
| 効果判定 <sup>*2</sup>    |                 |                 |                 | ●               |     |         |
| 血液検査（血算、生化学）          | ● <sup>*3</sup> |                 | ●               | ● <sup>*3</sup> |     | ●       |
| 血糖検査 <sup>*3</sup>    | ●               |                 |                 | ●               |     |         |
| ホルモン検査 <sup>*3</sup>  | ●               |                 |                 |                 |     |         |
| HbA1c                 | ●               |                 |                 | ▲ <sup>*4</sup> |     |         |
| D-ダイマー                | ●               |                 | ●               | ●               |     | ●       |
| CA-125                | ●               |                 |                 |                 |     |         |
| 心電図、胸部レントゲン           | ●               |                 |                 |                 |     | ▲       |
| 骨盤・胸部 CT              | ●               |                 |                 |                 |     | ▲       |
| 骨盤 MRI                | ●               |                 |                 |                 |     | ▲       |
| 超音波検査                 | ●               |                 |                 | ●               |     |         |
| 75gOGTT <sup>*5</sup> | ●               |                 |                 |                 |     |         |
| 有害事象の観察               |                 | ←               |                 |                 |     | →       |
| 併用薬の確認                |                 | ←               |                 |                 |     | →       |

●：必須の検査項目 ▲：必要に応じて実施する検査項目

\*1：最初に処方された日の翌日朝から、服用を開始します。

\*2：効果判定（検査結果のご説明）は、検査を行った日の次の来院時に行います。32 週の検査結果は原則として 36 週にお伝えし、第Ⅱ期に移行できるかを判断します。

\*3：スクリーニング、8、16、24、32 週時は、空腹時に採血します。

\*4：スクリーニング時の HbA1c が 6.5 以上の場合、経過測定を行います。

\*5：すでに糖尿病と診断されている場合や、スクリーニングで糖尿病の基準に達する（HbA1c が 6.5 以上かつ空腹時血糖が 120 mg/dL 以上）の場合はこの検査を行いません。

表 4 治験スケジュール（第Ⅱ期：維持治療期）

| 観察時期                     | 第Ⅰ期<br>36 週<br>(寛解判定) | 維持治療期                  |                        |       |                           |                         | 完了<br>時 | 中止<br>時 |
|--------------------------|-----------------------|------------------------|------------------------|-------|---------------------------|-------------------------|---------|---------|
|                          |                       | 120 週まで                |                        | 120 週 | 120 週～治験終了まで              |                         |         |         |
|                          |                       | 12 週、36 週、<br>60 週、・・・ | 24 週、48 週、<br>72 週、・・・ |       | 132 週、156 週、<br>180 週、・・・ | 144、168 週、<br>192 週、・・・ |         |         |
| 許容範囲（日）                  | -21                   | ±28                    | ±28                    | ±28   | ±28                       | ±28                     | -84     |         |
| 治験薬・併用薬・月経コン<br>トロール薬の処方 | ●                     | ●                      | ●                      | ●     | ●                         | ●                       |         |         |
| 不妊治療状況・育児希望<br>の有無       |                       |                        | ●                      | ●     |                           | ●                       | ●       |         |
| 服薬状況確認                   | ●                     | ●                      | ●                      | ●     | ●                         | ●                       | ●       |         |
| 身体所見                     |                       |                        | ●                      | ●     |                           | ●                       | ●       |         |
| 子宮内膜検査*1・効果判定            |                       | ●                      | ●                      | ●     |                           | ●                       | ●       | ●       |
| 血液検査（血算、生化学）             |                       |                        | ●*2                    | ●*2   |                           | ●*2                     | ●*2     | ●       |
| 空腹時血糖、インスリン*2            |                       |                        | ●                      | ●     |                           | ●                       | ●       |         |
| HbA1c*3                  |                       |                        | ▲                      | ▲     |                           | ▲                       | ▲       |         |
| 心電図・胸部レントゲン*4            |                       |                        |                        |       |                           |                         |         | ▲       |
| 骨盤・胸部 CT                 |                       |                        |                        | ●     |                           |                         |         | ▲*4     |
| 骨盤 MRI*4                 |                       |                        |                        |       |                           |                         |         | ▲       |
| 有害事象の観察                  | ←                     |                        |                        |       |                           |                         |         | →       |
| 併用薬の確認                   | ←                     |                        |                        |       |                           |                         |         | →       |
| 転帰の判定*5                  |                       |                        |                        | ●     |                           |                         | ●       | ●       |

●：必須の検査項目 ▲：必要に応じて実施する検査項目

\*1：第Ⅱ期では、外来にて簡易的な検査を行います（吸引組織診、簡易組織診、細胞診など）。外来の検査で再発が疑われる場合は、組織検査を行います。

\*2：中止時以外の来院時は、空腹時に採血します。

\*3：スクリーニング時の HbA1c が 6.5 以上の場合、経過測定を行います。

\*4：再発時や有害事象発生時に、必要に応じて実施します。

\*5：再発の有無を収集します。

＜妊娠が判明した際の対応について＞

妊娠が判明した場合は、可能な限りスケジュールに沿って来院していただき、経過観察を行います。出産された場合などは、担当の治験コーディネーターにご連絡ください。

この治験では、妊娠・出産に関連して下記の情報を収集します。

- ・妊娠を確認した日付
- ・妊娠方法（自然妊娠、不妊治療）
- ・妊娠転帰（生産、流産、死産）および転帰週数
- ・生児獲得日（分娩日）

## 5. この治験の参加予定期間

この治験に同意されてから、患者さんの参加期間は登録された日によって、3 年～5.5年になります。

## 6. 治験に参加する予定人数

この治験には、日本全国から 120 人の患者さんに参加していただく予定です。MPA のみを服用する A 群、MPA に加えてメトホルミン 750mg を服用する B 群、MPA に加えてメトホルミン 1500mg を服用する C 群に、それぞれ 40 人ずつ割り当てられます。

## 7. 治験の利益・不利益

### 【利益】

この治験で行うMPA療法は、現在あなたの病気に対する標準療法のひとつです。今回MPAにメトホルミンというお薬を併用した治療が病気の再発を抑える効果があると期待して試験が計画されました。しかし、現時点であなたの治療のお役に立てるかどうかは証明されていません。この治験の結果から、メトホルミンの子宮体癌あるいは子宮内膜異型増殖症に対する効果が確認できれば、新たな治療法として今後使用される可能性があります。

### 【不利益】

#### ・ 副作用

メトホルミンの内服による副作用としては、吐き気、嘔吐、下痢などが比較的多く見られるほか、以下に示す重篤な副作用もまれに起こります。また、他の糖尿病治療薬とメトホルミンを併用した場合に低血糖が起こる可能性があります（よく効くようになるためと考えられます）。

この試験に参加される患者さんの副作用には細心の注意を払って対応いたしますが、もしいつもと異なる症状が現れた時には速やかに報告してください。症状と程度を適切に判断して、副作用を軽減できるよう最善の処置を行います。

### ① 重大な副作用として報告されているもの

- ・乳酸アシドーシス（頻度不明）：吐き気、嘔吐などの胃腸症状、深く大きい呼吸、意識が薄れるなどが現れることがあります。
- ・低血糖（頻度不明）：脱力感、強い空腹感、冷や汗、動悸、手足のふるえ、意識が薄れるなどが現れることがあります。
- ・肝機能障害、黄疸（頻度不明）：皮膚が黄色くなる、嘔吐、白目が黄色くなる、尿の色が濃くなる、吐き気、食欲不振、かゆみ、からだがだるい症状が現れることがあります。
- ・横紋筋融解症（頻度不明）：脱力感、手のしびれ、手足のこわばり、足のしびれ、筋肉の痛み、尿が赤褐色の症状が現れることがあります。

### ② その他の副作用

- |    |                                                                                                                                                    |
|----|----------------------------------------------------------------------------------------------------------------------------------------------------|
| 頻度 | 5%以上：下痢                                                                                                                                            |
|    | 0.1～5%未満：食欲不振、腹痛、悪心、嘔吐、腹部膨満感、便秘、発疹等、全身倦怠感、頭痛、頭重                                                                                                    |
|    | 0.1%未満：消化不良等、眠気                                                                                                                                    |
|    | 頻度不明：胃炎、胃腸障害、放屁増加、貧血、白血球減少、血小板減少、白血球増加、好酸球増加、そう痒、肝機能異常、BUN上昇、クレアチニン上昇、CK上昇、ケトーシス、乳酸上昇、血中カリウム上昇、血中尿酸増加、筋肉痛、めまい・ふらつき、味覚異常、浮腫、動悸、発汗、脱力感、空腹感、ビタミンB12減少 |

## 8. この治験に参加しない場合の、他の治療法

もしあなたがこの治験に参加されない場合でも、MPA 療法を通常の診療で受けることができます。子宮温存可能な治療法は MPA 療法しかなく、他の選択肢となる治療法としては、子宮を摘出する手術療法があります。担当医師から詳しい説明を受けてください。

## 9. 治験への参加を中止する場合について

あなたがこの治験への参加への取り止めを希望された場合だけでなく、以下に示した項目に該当した場合は、この治験の途中で参加を中止していただく場合がありますのでご了承ください。その場合はすぐに中止の理由を説明いたします。

- ① MPA 療法の効果が見られず、病態の進行が認められた場合
- ② I 期の 32 週目の検査で、病変が消失していなかった場合
- ③ 病変が消失した後に、子宮内膜異型増殖症、子宮内膜癌が再発した場合
- ④ 有害事象により計画書の治療が継続できない場合
- ⑤ 服用できない期間が計画書で定める休薬期間を超えてしまった場合
- ⑥ ステロイドの長期投与により、全身に影響があると医師が判断した場合
- ⑦ 合併症の悪化により病態が急激に悪くなった場合
- ⑧ 患者さん本人または家族から試験中止の申し出があった場合
- ⑨ 試験参加中に守っていただきたいことを守っていただけない場合
- ⑩ その他、試験担当医師が本試験の継続を不可能と判断した場合

中止時には安全性の確認のために検査を行います。また、副作用により試験を中止した場合もその副作用がなくなるまで身体状態を検査することがありますので、ご協力をお願いいたします。

なお、途中で試験を中止した場合でもそれまでの記録は今後の研究に役立つ貴重なデータとして使用させていただきます。

## 10. 新たに重要な情報が得られた場合について

この治験についてお聞きになりたいことがあれば、担当医師に遠慮なくおたずねください。この治験に関する新しい重大な情報（治験の危険性・安全性など）が得られた場合には、速やかにその内容をあなたに伝えます。その場合、このまま治験への参加を続けるかどうか、もう一度あなたの自由な意思で決めていただきます。

### 11. 治験に関連した健康被害の治療について

この治験は、科学的に計画され慎重に行われます。もし、この治験に参加した後何か変わった症状にお気づきの場合は、すぐに担当医師または治験コーディネーターにお知らせください。その時点で最善と思われる処置を行い、適切に対処した上で補償が受けられます。ただし、治験を担当する医師の指示に従わず、その損害があなた自身の過失や故意によるものである場合には、補償が受けられないこともあります。補償について詳しく説明を受けたい場合は、治験を担当する医師あるいは

は治験の相談窓口にお問い合わせ下さい。補償について詳しい内容をご希望の方は資料をお渡しします。

## 1 2. 治験に参加された場合の費用について

### 1) 治験期間中の医療費について

この治験で行う MPA 療法は、通常の診療として承認されている治療法ですので、それに係る薬剤費や、診療費や検査費用などの治療費はあなたご自身が加入されている健康保険に基づいて賄われ、あなたには通常の診療どおり自己負担分をお支払いいただきます。あなたが B 群（メトホルミン 750mg 群）もしくは C 群（メトホルミン 1500mg 群）に割り当てられた場合、メトホルミンのお薬代は研究費により支払われます。

### 2) 治験中の費用の負担軽減について

治験に参加していただけることになった場合、治験のための診察や検査のために、来院する回数が通常の診療より増え、それに伴い交通費などの負担が増えることがあります。この負担を軽くするため、この治験の検査スケジュールで決められた日の来院 1 回につき 7,000 円をお支払いします。治験のための検査、診察を受けるために来院される回数に、7,000 円を乗じた金額を月ごとにまとめて、あなたの口座に振り込みます。また、治験のために入院される場合は、入退院を合わせて 1 回と数え、1 回あたり 7,000 円をお支払いします。お支払いは、病院からあなたの指定する銀行または信用金庫の口座に振り込ませていただきます。

また、かかりつけの病院や他の医療機関で治療を受けた場合に、他院の担当医師へ電話や手紙で連絡をとり、医療情報の提供を求める場合があります。その際に他院からあなたの情報を提供していただくにあたって、情報提供料としてあなたの費用負担が増える場合があります。その際は、あなたに給付される負担軽減費の中からお支払いいただくようお願い致します。

### 13. カルテなどの医療記録の閲覧と秘密の保全について

治験にご協力いただいた個人が特定されるような情報は厳重に保護され、外部に漏れることはありません。患者さんから得られたデータがコード番号などで匿名化され、報告書等でその患者さんのものであると特定されないような取扱いをいたします。

この治験の結果は、国（厚生労働省）からメトホルミンを子宮内膜異型増殖症/子宮体癌の治療薬として認めてもらうために、厚生労働省に提出されます。また、この治験薬の効果や安全性についてより詳細に検討するために、治験のデータとして使用された検査・調査等の治験薬の評価に必要なデータを国内外の機関へ提出することがあります。さらに、この治験から得られた情報は、各地の病院から集められた記録をまとめて、学会や医学雑誌等に公表されることもあります。しかし、いずれの場合も、あなたのお名前などが用いられることはなく、あなたの個人情報（氏名、住所、電話番号等）は秘密事項として保護され、外部に漏れることはありません。

また、治験がきちんと行われているかどうかを調べるために、治験薬の開発支援機関の担当者、この病院の治験審査委員会および厚生労働省など規制当局の職員が、カルテなどのあなたの医療に関する記録を閲覧することがあります（他科の診療記録や治験参加以前の期間も含みます）。このような場合でもこれらの関係者には秘密を守る義務が課せられており、患者さんのプライバシーは守られます。

さらに、他の医療機関で治療を受けた場合も、他院の担当医師へ電話や手紙で連絡を取り、医療情報の提供を求める場合があります。あなたがこの説明文書の最後にある同意文書に署名することにより、記録を閲覧することおよび他の医療機関からの情報収集に関しても承諾していただいたことになります。

あなたは、診療情報の利用についていつでも承諾を取り消すことができますが、その後はこの治験に参加いただけなくなりますのでご了承ください。承諾を取り消したい場合は担当医師又は病院の治験コーディネーターにお伝えください。なお、

承諾を取り消すまでに収集された治験データは、上記と同様に利用されますが、承諾を取り消された後は、この治験が正しく行われたかどうかを確認するような場合を除いて、あなたの診療情報が利用されることはありません。

## 1 4. 治験に参加いただくことは自由です

この治験に参加するか否かの決定は、あなた自身の意思に<sup>ゆだ</sup>委ねられます。ご家族の方と相談してから決めて頂くことも出来ます。また、治験に参加している途中で、いつでも自由にやめることができます。もし参加していただかなくても、あなたが今後の治療を受ける上で不利な扱いを受けることは決してありません。

## 1 5. 患者さんに守っていただきたいことについて

この治験への参加に同意していただいた場合は、次の事項をお守りください。

- 1) 治験参加期間中は、治験のスケジュールに従ってください。
- 2) 現在、他の診療科や病院で治療を受けていたり、くすりを飲まれていたりする場合は、担当医師または治験コーディネーターにその状況を詳しくお話下さい。その治療を行っている医師に、あなたがこの治験に参加されていることをお伝えさせていただきます。  
また、市販のくすりを飲む場合も、前もって担当医師または治験コーディネーターにご相談ください。
- 3) 治験中に行われる検査は、あなたの症状の変化や副作用を知るうえで大変重要なものになりますので、担当医師及び治験コーディネーターの指示に従って受けてください。
- 4) 治験薬を使用している間に、体調の変化など何か変わったことがあった場合は、担当医師あるいは治験コーディネーターにお知らせください。
- 5) その他にも、治験を担当する医師からの注意事項や指示にしたがってください。

## 16. 知的財産権と利益相反について

本治験の結果が特許権等の知的財産を生み出す可能性があります、その場合の知的財産権は研究機関に帰属します。

また、本治験の実施に関して、利益相反\*（起こりうる利害の衝突）は存在しないことが利益相反審査委員会で確認されています。

\*利益相反とは：たとえば製薬会社から資金提供その他を受けている場合に自己や製薬会社の利益を図り、患者さんの安全を損なったりデータの解釈をゆがめてしまう行為のことです。

## 17. 治験を審査する委員会

この治験は、以下の治験審査委員会で、科学のおよび医学的な面だけでなく、患者さんの安全や人権も含めた倫理的面からも審査されています。治験審査委員会は、医療を専門としない委員や、当院と利害関係のない委員も含まれています。

- 1) 名称：千葉大学医学部附属病院 治験審査委員会
- 2) 設置者：千葉大学医学部附属病院 病院長
- 3) 所在地：〒260-8677 千葉県千葉市中央区亥鼻 1-8-1

治験を開始した後も、上記の内容が変更された場合、重篤な副作用の発現といった安全性情報が得られた場合など、この治験を継続して良いかを、当院の病院長からの依頼に応じて審査します。

審査の結果は当院の病院長に報告され、院長はその報告内容を基に当院での治験の開始、継続を決定します。

なお、治験審査委員会の手順書（審査の進め方を示した文書）、議事概要（話し合いの記録）や委員のリストなどの情報について知りたい場合は、治験事務局までお問い合わせください。これらの情報についてはホームページ上でも掲載しております。（URL：<https://www.ho.chiba-u.ac.jp/>）

18. 治験に関する相談窓口

この治験ならびに治療の内容について、わからない言葉や、疑問、質問、もう一度聞きたいことがあるときや、更に詳しい情報を知りたい場合は、遠慮せずにいつでもお尋ねください。治験が始まった後でも、わからないことがあれば、なんでもお答えいたします。また、この治験薬を使うことになにか心配がありましたら、いつでも遠慮なく担当医師または治験コーディネーターにご連絡ください。

以上、この治験の内容について十分ご理解いただいた上で、この治験への参加に同意していただける場合は、この説明文書の最後にある同意文書に同意年月日の記載と署名をお願いいたします。

この説明文書と同意文書（患者さん用）は大切に保管してください。

病院名： 千葉大学医学部附属病院  
治験責任医師：三橋 暁 （職名：医師）  
あなたの担当医師：

相談窓口

【平日(8:30-17:00)】

- 婦人科外来  
代表：043-222-7171（内線 6891）
- 臨床試験部 治験コーディネーター室  
代表：043-222-7171（内線 6462）  
直通：043-226-2630

【夜間および休日】

代表：043-222-7171

※婦人科で治験に参加している旨を必ずお伝えください。

【千葉大学医学部附属病院】治験実施計画書番号：Chiba-Met003 1.0 版（2019 年 5 月 24 日）  
説明文書・同意書 1.0 版（2019 年 5 月 24 日）

医師用

## 同意文書

私は、「子宮内膜異型増殖症・子宮体癌に対するメドロキシプロゲステロンとメトホルミ  
ンの併用妊孕性温存療法の用量反応性試験」に参加するにあたり、以下の内容について説  
明を受け、十分に理解した上で、自らの自由意思により本治験に参加することに同意しま  
す。

同意日：20 年 月 日

患者さんの名前（署名）：

☆ 治験に関する負担軽減費の支払いを受けることに

☐ 同意します ☐ 同意しません（負担軽減費はいただきません）

（どちらかの□にチェックしてください）

治験責任医師（治験分担医師）

署名： 説明日：20 年 月 日

補足説明者

署名： 説明日：20 年 月 日

病院用

同 意 文 書

私は、「子宮内膜異型増殖症・子宮体癌に対するメドロキシプロゲステロンとメトホルミ  
ンの併用妊孕性温存療法の用量反応性試験」に参加するにあたり、以下の内容について説  
明を受け、十分に理解した上で、自らの自由意思により本治験に参加することに同意しま  
す。

同意日：20 年 月 日

患者さんの名前（署名）：

☆ 治験に関する負担軽減費の支払いを受けることに  
☐同意します ☐同意しません（負担軽減費はいただきません）  
（どちらかの□にチェックしてください）

治験責任医師（治験分担医師）

署名： 説明日：20 年 月 日

補足説明者

署名： 説明日：20 年 月 日

【千葉大学医学部附属病院】治験実施計画書番号：Chiba-Met003 1.0 版（2019 年 5 月 24 日）  
説明文書・同意書 1.0 版（2019 年 5 月 24 日）

患者さん用

## 同 意 文 書

私は、「子宮内膜異型増殖症・子宮体癌に対するメドロキシプロゲステロンとメトホルミ  
ンの併用妊孕性温存療法の用量反応性試験」に参加するにあたり、以下の内容について説  
明を受け、十分に理解した上で、自らの自由意思により本治験に参加することに同意しま  
す。

同意日：20 年 月 日

患者さんの名前（署名）：

☆ 治験に関する負担軽減費の支払いを受けることに

☐ 同意します ☐ 同意しません（負担軽減費はいただきません）

（どちらかの□にチェックしてください）

治験責任医師（治験分担医師）

署名： 説明日：20 年 月 日

補足説明者

署名： 説明日：20 年 月 日

**A list of recruiting sites (from north to south)**

Hokkaido University Hospital

Tohoku University Hospital

University of Tsukuba Hospital

Jichi Medical University Hospital

The Jikei University Hospital

Chiba University Hospital

Keio University Hospital

Tokai University Hospital

Kitasato University Hospital

Niigata University Medical & Dental Hospital

Shinshu University Hospital

Osaka Medical College Hospital

Gifu University Hospital

Kurume University Hospital

Kumamoto University Hospital

**The names of Ethics Committee/s (from north to south)**

Institutional review board, Hokkaido University Hospital

Institutional review board, Tohoku University Hospital

Institutional review board, University of Tsukuba Hospital

Institutional review board, Jichi Medical University Hospital

Institutional review board, The Jikei University Hospital

Institutional review board, Chiba University Hospital

Institutional review board, Keio University Hospital

Institutional review board, Tokai University Hospital

Institutional review board, Kitasato University Hospital

Institutional review board, Niigata University Medical & Dental Hospital

Institutional review board, Shinshu University Hospital

Institutional review board, Osaka Medical College Hospital

Institutional review board, Gifu University Hospital

Institutional review board, Kurume University Hospital

Institutional review board, Kumamoto University Hospital

# Reporting checklist for protocol of a clinical trial.

Based on the SPIRIT guidelines.

## Instructions to authors

Complete this checklist by entering the page numbers from your manuscript where readers will find each of the items listed below.

Your article may not currently address all the items on the checklist. Please modify your text to include the missing information. If you are certain that an item does not apply, please write "n/a" and provide a short explanation.

Upload your completed checklist as an extra file when you submit to a journal.

In your methods section, say that you used the SPIRIT reporting guidelines, and cite them as:

Chan A-W, Tetzlaff JM, Altman DG, Laupacis A, Gøtzsche PC, Krleža-Jerić K, Hróbjartsson A, Mann H, Dickersin K, Berlin J, Doré C, Parulekar W, Summerskill W, Groves T, Schulz K, Sox H, Rockhold FW, Rennie D, Moher D. SPIRIT 2013 Statement: Defining standard protocol items for clinical trials. Ann Intern Med. 2013;158(3):200-207

| Reporting Item                    |                     |                                                                                                              | Page Number      |
|-----------------------------------|---------------------|--------------------------------------------------------------------------------------------------------------|------------------|
| <b>Administrative information</b> |                     |                                                                                                              |                  |
| Title                             | <a href="#">#1</a>  | Descriptive title identifying the study design, population, interventions, and, if applicable, trial acronym | 1                |
| Trial registration                | <a href="#">#2a</a> | Trial identifier and registry name. If not yet registered, name of intended registry                         | 4                |
| Trial registration: data set      | <a href="#">#2b</a> | All items from the World Health Organization Trial Registration Data Set                                     | register to jRCT |
| Protocol version                  | <a href="#">#3</a>  | Date and version identifier                                                                                  | n/a              |
| Funding                           | <a href="#">#4</a>  | Sources and types of financial, material, and other support                                                  | 20               |

|                                                                                        |                                                            |                     |                                                                                                                                                                                                                                                                                          |       |
|----------------------------------------------------------------------------------------|------------------------------------------------------------|---------------------|------------------------------------------------------------------------------------------------------------------------------------------------------------------------------------------------------------------------------------------------------------------------------------------|-------|
| 1<br>2<br>3<br>4<br>5<br>6<br>7<br>8<br>9<br>10<br>11<br>12                            | Roles and responsibilities:<br>contributorship             | <a href="#">#5a</a> | Names, affiliations, and roles of protocol contributors                                                                                                                                                                                                                                  | 1, 20 |
| 13<br>14<br>15<br>16<br>17<br>18<br>19<br>20<br>21<br>22<br>23                         | Roles and responsibilities:<br>sponsor contact information | <a href="#">#5b</a> | Name and contact information for the trial sponsor                                                                                                                                                                                                                                       | 20    |
| 24<br>25<br>26<br>27<br>28<br>29<br>30<br>31<br>32<br>33                               | Roles and responsibilities:<br>sponsor and funder          | <a href="#">#5c</a> | Role of study sponsor and funders, if any, in study design; collection, management, analysis, and interpretation of data; writing of the report; and the decision to submit the report for publication, including whether they will have ultimate authority over any of these activities | 20    |
| 34<br>35<br>36<br>37<br>38<br>39<br>40<br>41<br>42<br>43<br>44<br>45<br>46<br>47<br>48 | Roles and responsibilities:<br>committees                  | <a href="#">#5d</a> | Composition, roles, and responsibilities of the coordinating centre, steering committee, endpoint adjudication committee, data management team, and other individuals or groups overseeing the trial, if applicable (see Item 21a for data monitoring committee)                         | 14    |
| 34                                                                                     | <b>Introduction</b>                                        |                     |                                                                                                                                                                                                                                                                                          |       |
| 36<br>37<br>38<br>39<br>40<br>41<br>42<br>43<br>44<br>45<br>46<br>47<br>48             | Background and rationale                                   | <a href="#">#6a</a> | Description of research question and justification for undertaking the trial, including summary of relevant studies (published and unpublished) examining benefits and harms for each intervention                                                                                       | 4-5   |
| 49<br>50<br>51<br>52<br>53<br>54<br>55<br>56<br>57<br>58<br>59<br>60                   | Background and rationale: choice of comparators            | <a href="#">#6b</a> | Explanation for choice of comparators                                                                                                                                                                                                                                                    | 4-5   |
|                                                                                        | Objectives                                                 | <a href="#">#7</a>  | Specific objectives or hypotheses                                                                                                                                                                                                                                                        | 5     |
|                                                                                        | Trial design                                               | <a href="#">#8</a>  | Description of trial design including type of trial (eg, parallel group, crossover, factorial, single group), allocation ratio, and framework (eg, superiority, equivalence, non-inferiority, exploratory)                                                                               | 4-5   |

|    |                                 |                      |                                                                                                                                                                                                  |                                 |
|----|---------------------------------|----------------------|--------------------------------------------------------------------------------------------------------------------------------------------------------------------------------------------------|---------------------------------|
| 1  | <b>Methods:</b>                 |                      |                                                                                                                                                                                                  |                                 |
| 2  | <b>Participants,</b>            |                      |                                                                                                                                                                                                  |                                 |
| 3  | <b>interventions, and</b>       |                      |                                                                                                                                                                                                  |                                 |
| 4  | <b>outcomes</b>                 |                      |                                                                                                                                                                                                  |                                 |
| 5  |                                 |                      |                                                                                                                                                                                                  |                                 |
| 6  |                                 |                      |                                                                                                                                                                                                  |                                 |
| 7  |                                 |                      |                                                                                                                                                                                                  |                                 |
| 8  | Study setting                   | <a href="#">#9</a>   | Description of study settings (eg, community clinic, academic hospital) and list of countries where data will be collected. Reference to where list of study sites can be obtained               | 6                               |
| 9  |                                 |                      |                                                                                                                                                                                                  |                                 |
| 10 |                                 |                      |                                                                                                                                                                                                  |                                 |
| 11 |                                 |                      |                                                                                                                                                                                                  |                                 |
| 12 |                                 |                      |                                                                                                                                                                                                  |                                 |
| 13 |                                 |                      |                                                                                                                                                                                                  |                                 |
| 14 |                                 |                      |                                                                                                                                                                                                  |                                 |
| 15 | Eligibility criteria            | <a href="#">#10</a>  | Inclusion and exclusion criteria for participants. If applicable, eligibility criteria for study centres and individuals who will perform the interventions (eg, surgeons, psychotherapists)     | 7-10                            |
| 16 |                                 |                      |                                                                                                                                                                                                  |                                 |
| 17 |                                 |                      |                                                                                                                                                                                                  |                                 |
| 18 |                                 |                      |                                                                                                                                                                                                  |                                 |
| 19 |                                 |                      |                                                                                                                                                                                                  |                                 |
| 20 |                                 |                      |                                                                                                                                                                                                  |                                 |
| 21 |                                 |                      |                                                                                                                                                                                                  |                                 |
| 22 | Interventions: description      | <a href="#">#11a</a> | Interventions for each group with sufficient detail to allow replication, including how and when they will be administered                                                                       | 11-12                           |
| 23 |                                 |                      |                                                                                                                                                                                                  |                                 |
| 24 |                                 |                      |                                                                                                                                                                                                  |                                 |
| 25 |                                 |                      |                                                                                                                                                                                                  |                                 |
| 26 |                                 |                      |                                                                                                                                                                                                  |                                 |
| 27 |                                 |                      |                                                                                                                                                                                                  |                                 |
| 28 | Interventions: modifications    | <a href="#">#11b</a> | Criteria for discontinuing or modifying allocated interventions for a given trial participant (eg, drug dose change in response to harms, participant request, or improving / worsening disease) | 12-13                           |
| 29 |                                 |                      |                                                                                                                                                                                                  |                                 |
| 30 |                                 |                      |                                                                                                                                                                                                  |                                 |
| 31 |                                 |                      |                                                                                                                                                                                                  |                                 |
| 32 |                                 |                      |                                                                                                                                                                                                  |                                 |
| 33 |                                 |                      |                                                                                                                                                                                                  |                                 |
| 34 |                                 |                      |                                                                                                                                                                                                  |                                 |
| 35 | Interventions: adherence        | <a href="#">#11c</a> | Strategies to improve adherence to intervention protocols, and any procedures for monitoring adherence (eg, drug tablet return; laboratory tests)                                                | n/a                             |
| 36 |                                 |                      |                                                                                                                                                                                                  |                                 |
| 37 |                                 |                      |                                                                                                                                                                                                  | describe in original protocol.  |
| 38 |                                 |                      |                                                                                                                                                                                                  |                                 |
| 39 |                                 |                      |                                                                                                                                                                                                  |                                 |
| 40 |                                 |                      |                                                                                                                                                                                                  |                                 |
| 41 |                                 |                      |                                                                                                                                                                                                  |                                 |
| 42 |                                 |                      |                                                                                                                                                                                                  |                                 |
| 43 |                                 |                      |                                                                                                                                                                                                  | Available on supplementary file |
| 44 |                                 |                      |                                                                                                                                                                                                  |                                 |
| 45 |                                 |                      |                                                                                                                                                                                                  |                                 |
| 46 |                                 |                      |                                                                                                                                                                                                  |                                 |
| 47 |                                 |                      |                                                                                                                                                                                                  |                                 |
| 48 | Interventions: concomitant care | <a href="#">#11d</a> | Relevant concomitant care and interventions that are permitted or prohibited during the trial                                                                                                    | n/a                             |
| 49 |                                 |                      |                                                                                                                                                                                                  |                                 |
| 50 |                                 |                      |                                                                                                                                                                                                  |                                 |
| 51 |                                 |                      |                                                                                                                                                                                                  | describe in original protocol.  |
| 52 |                                 |                      |                                                                                                                                                                                                  |                                 |
| 53 |                                 |                      |                                                                                                                                                                                                  |                                 |
| 54 |                                 |                      |                                                                                                                                                                                                  |                                 |
| 55 |                                 |                      |                                                                                                                                                                                                  |                                 |
| 56 |                                 |                      |                                                                                                                                                                                                  | Available on supplementary file |
| 57 |                                 |                      |                                                                                                                                                                                                  |                                 |
| 58 |                                 |                      |                                                                                                                                                                                                  |                                 |
| 59 |                                 |                      |                                                                                                                                                                                                  |                                 |
| 60 |                                 |                      |                                                                                                                                                                                                  |                                 |

|                                                            |                      |                                                                                                                                                                                                                                                                                                                                                                                |       |
|------------------------------------------------------------|----------------------|--------------------------------------------------------------------------------------------------------------------------------------------------------------------------------------------------------------------------------------------------------------------------------------------------------------------------------------------------------------------------------|-------|
| Outcomes                                                   | <a href="#">#12</a>  | Primary, secondary, and other outcomes, including the specific measurement variable (eg, systolic blood pressure), analysis metric (eg, change from baseline, final value, time to event), method of aggregation (eg, median, proportion), and time point for each outcome. Explanation of the clinical relevance of chosen efficacy and harm outcomes is strongly recommended | 14-16 |
| Participant timeline                                       | <a href="#">#13</a>  | Time schedule of enrolment, interventions (including any run-ins and washouts), assessments, and visits for participants. A schematic diagram is highly recommended (see Figure)                                                                                                                                                                                               | 11-12 |
| Sample size                                                | <a href="#">#14</a>  | Estimated number of participants needed to achieve study objectives and how it was determined, including clinical and statistical assumptions supporting any sample size calculations                                                                                                                                                                                          | 16    |
| Recruitment                                                | <a href="#">#15</a>  | Strategies for achieving adequate participant enrolment to reach target sample size                                                                                                                                                                                                                                                                                            | 16    |
| <b>Methods:</b>                                            |                      |                                                                                                                                                                                                                                                                                                                                                                                |       |
| <b>Assignment of interventions (for controlled trials)</b> |                      |                                                                                                                                                                                                                                                                                                                                                                                |       |
| Allocation: sequence generation                            | <a href="#">#16a</a> | Method of generating the allocation sequence (eg, computer-generated random numbers), and list of any factors for stratification. To reduce predictability of a random sequence, details of any planned restriction (eg, blocking) should be provided in a separate document that is unavailable to those who enrol participants or assign interventions                       | 10    |

|    |                        |                      |                                                        |               |
|----|------------------------|----------------------|--------------------------------------------------------|---------------|
| 1  | Allocation             | <a href="#">#16b</a> | Mechanism of implementing the allocation               | 10            |
| 2  | concealment            |                      | sequence (eg, central telephone; sequentially          |               |
| 3  | mechanism              |                      | numbered, opaque, sealed envelopes), describing        |               |
| 4  |                        |                      | any steps to conceal the sequence until                |               |
| 5  |                        |                      | interventions are assigned                             |               |
| 6  |                        |                      |                                                        |               |
| 7  |                        |                      |                                                        |               |
| 8  |                        |                      |                                                        |               |
| 9  | Allocation:            | <a href="#">#16c</a> | Who will generate the allocation sequence, who         | n/a           |
| 10 | implementation         |                      | will enrol participants, and who will assign           |               |
| 11 |                        |                      | participants to interventions                          | describe in   |
| 12 |                        |                      |                                                        | original      |
| 13 |                        |                      |                                                        | protocol.     |
| 14 |                        |                      |                                                        |               |
| 15 |                        |                      |                                                        | Available on  |
| 16 |                        |                      |                                                        | supplementary |
| 17 |                        |                      |                                                        | file          |
| 18 |                        |                      |                                                        |               |
| 19 | Blinding (masking)     | <a href="#">#17a</a> | Who will be blinded after assignment to                | n/a           |
| 20 |                        |                      | interventions (eg, trial participants, care providers, |               |
| 21 |                        |                      | outcome assessors, data analysts), and how             | describe in   |
| 22 |                        |                      |                                                        | original      |
| 23 |                        |                      |                                                        | protocol.     |
| 24 |                        |                      |                                                        |               |
| 25 |                        |                      |                                                        | Available on  |
| 26 |                        |                      |                                                        | supplementary |
| 27 |                        |                      |                                                        | file.         |
| 28 |                        |                      |                                                        |               |
| 29 | Blinding (masking):    | <a href="#">#17b</a> | If blinded, circumstances under which unblinding is    | 10            |
| 30 | emergency              |                      | permissible, and procedure for revealing a             |               |
| 31 | unblinding             |                      | participant's allocated intervention during the trial  |               |
| 32 |                        |                      |                                                        |               |
| 33 |                        |                      |                                                        |               |
| 34 |                        |                      |                                                        |               |
| 35 | <b>Methods: Data</b>   |                      |                                                        |               |
| 36 | <b>collection,</b>     |                      |                                                        |               |
| 37 | <b>management, and</b> |                      |                                                        |               |
| 38 | <b>analysis</b>        |                      |                                                        |               |
| 39 |                        |                      |                                                        |               |
| 40 |                        |                      |                                                        |               |
| 41 | Data collection plan   | <a href="#">#18a</a> | Plans for assessment and collection of outcome,        | 14-16         |
| 42 |                        |                      | baseline, and other trial data, including any related  |               |
| 43 |                        |                      | processes to promote data quality (eg, duplicate       |               |
| 44 |                        |                      | measurements, training of assessors) and a             |               |
| 45 |                        |                      | description of study instruments (eg,                  |               |
| 46 |                        |                      | questionnaires, laboratory tests) along with their     |               |
| 47 |                        |                      | reliability and validity, if known. Reference to where |               |
| 48 |                        |                      |                                                        |               |
| 49 |                        |                      |                                                        |               |
| 50 |                        |                      |                                                        |               |
| 51 |                        |                      |                                                        |               |
| 52 |                        |                      |                                                        |               |
| 53 |                        |                      |                                                        |               |
| 54 |                        |                      |                                                        |               |
| 55 |                        |                      |                                                        |               |
| 56 |                        |                      |                                                        |               |
| 57 |                        |                      |                                                        |               |
| 58 |                        |                      |                                                        |               |
| 59 |                        |                      |                                                        |               |
| 60 |                        |                      |                                                        |               |

data collection forms can be found, if not in the protocol

|                                                  |                      |                                                                                                                                                                                                                                                                   |                                                                                 |
|--------------------------------------------------|----------------------|-------------------------------------------------------------------------------------------------------------------------------------------------------------------------------------------------------------------------------------------------------------------|---------------------------------------------------------------------------------|
| Data collection plan: retention                  | <a href="#">#18b</a> | Plans to promote participant retention and complete follow-up, including list of any outcome data to be collected for participants who discontinue or deviate from intervention protocols                                                                         | n/a<br><br>describe in original protocol<br><br>Available on supplementary file |
| Data management                                  | <a href="#">#19</a>  | Plans for data entry, coding, security, and storage, including any related processes to promote data quality (eg, double data entry; range checks for data values). Reference to where details of data management procedures can be found, if not in the protocol | 10, 13                                                                          |
| Statistics: outcomes                             | <a href="#">#20a</a> | Statistical methods for analysing primary and secondary outcomes. Reference to where other details of the statistical analysis plan can be found, if not in the protocol                                                                                          | 14-16                                                                           |
| Statistics: additional analyses                  | <a href="#">#20b</a> | Methods for any additional analyses (eg, subgroup and adjusted analyses)                                                                                                                                                                                          | n/a                                                                             |
| Statistics: analysis population and missing data | <a href="#">#20c</a> | Definition of analysis population relating to protocol non-adherence (eg, as randomised analysis), and any statistical methods to handle missing data (eg, multiple imputation)                                                                                   | 14-16                                                                           |

## Methods: Monitoring

|                                   |                      |                                                                                                                                                                                                                                                                                                                                       |    |
|-----------------------------------|----------------------|---------------------------------------------------------------------------------------------------------------------------------------------------------------------------------------------------------------------------------------------------------------------------------------------------------------------------------------|----|
| Data monitoring: formal committee | <a href="#">#21a</a> | Composition of data monitoring committee (DMC); summary of its role and reporting structure; statement of whether it is independent from the sponsor and competing interests; and reference to where further details about its charter can be found, if not in the protocol. Alternatively, an explanation of why a DMC is not needed | 14 |
|-----------------------------------|----------------------|---------------------------------------------------------------------------------------------------------------------------------------------------------------------------------------------------------------------------------------------------------------------------------------------------------------------------------------|----|

|    |                      |                      |                                                        |         |
|----|----------------------|----------------------|--------------------------------------------------------|---------|
| 1  | Data monitoring:     | <a href="#">#21b</a> | Description of any interim analyses and stopping       | 16-17   |
| 2  | interim analysis     |                      | guidelines, including who will have access to these    |         |
| 3  |                      |                      | interim results and make the final decision to         |         |
| 4  |                      |                      | terminate the trial                                    |         |
| 5  |                      |                      |                                                        |         |
| 6  |                      |                      |                                                        |         |
| 7  |                      |                      |                                                        |         |
| 8  | Harms                | <a href="#">#22</a>  | Plans for collecting, assessing, reporting, and        | 13, 16  |
| 9  |                      |                      | managing solicited and spontaneously reported          |         |
| 10 |                      |                      | adverse events and other unintended effects of trial   |         |
| 11 |                      |                      | interventions or trial conduct                         |         |
| 12 |                      |                      |                                                        |         |
| 13 |                      |                      |                                                        |         |
| 14 |                      |                      |                                                        |         |
| 15 | Auditing             | <a href="#">#23</a>  | Frequency and procedures for auditing trial            | 13, 14, |
| 16 |                      |                      | conduct, if any, and whether the process will be       |         |
| 17 |                      |                      | independent from investigators and the sponsor         |         |
| 18 |                      |                      |                                                        |         |
| 19 |                      |                      |                                                        |         |
| 20 |                      |                      |                                                        |         |
| 21 | <b>Ethics and</b>    |                      |                                                        |         |
| 22 | <b>dissemination</b> |                      |                                                        |         |
| 23 |                      |                      |                                                        |         |
| 24 | Research ethics      | <a href="#">#24</a>  | Plans for seeking research ethics committee /          | 17, 20  |
| 25 | approval             |                      | institutional review board (REC / IRB) approval        |         |
| 26 |                      |                      |                                                        |         |
| 27 |                      |                      |                                                        |         |
| 28 | Protocol             | <a href="#">#25</a>  | Plans for communicating important protocol             | 17      |
| 29 | amendments           |                      | modifications (eg, changes to eligibility criteria,    |         |
| 30 |                      |                      | outcomes, analyses) to relevant parties (eg,           |         |
| 31 |                      |                      | investigators, REC / IRBs, trial participants, trial   |         |
| 32 |                      |                      | registries, journals, regulators)                      |         |
| 33 |                      |                      |                                                        |         |
| 34 |                      |                      |                                                        |         |
| 35 |                      |                      |                                                        |         |
| 36 |                      |                      |                                                        |         |
| 37 | Consent or assent    | <a href="#">#26a</a> | Who will obtain informed consent or assent from        | 17      |
| 38 |                      |                      | potential trial participants or authorised surrogates, |         |
| 39 |                      |                      | and how (see Item 32)                                  |         |
| 40 |                      |                      |                                                        |         |
| 41 |                      |                      |                                                        |         |
| 42 |                      |                      |                                                        |         |
| 43 | Consent or assent:   | <a href="#">#26b</a> | Additional consent provisions for collection and use   | 17      |
| 44 | ancillary studies    |                      | of participant data and biological specimens in        |         |
| 45 |                      |                      | ancillary studies, if applicable                       |         |
| 46 |                      |                      |                                                        |         |
| 47 |                      |                      |                                                        |         |
| 48 | Confidentiality      | <a href="#">#27</a>  | How personal information about potential and           | 17      |
| 49 |                      |                      | enrolled participants will be collected, shared, and   |         |
| 50 |                      |                      | maintained in order to protect confidentiality before, |         |
| 51 |                      |                      | during, and after the trial                            |         |
| 52 |                      |                      |                                                        |         |
| 53 |                      |                      |                                                        |         |
| 54 |                      |                      |                                                        |         |
| 55 | Declaration of       | <a href="#">#28</a>  | Financial and other competing interests for            | 17      |
| 56 | interests            |                      | principal investigators for the overall trial and each |         |
| 57 |                      |                      | study site                                             |         |
| 58 |                      |                      |                                                        |         |
| 59 |                      |                      |                                                        |         |
| 60 |                      |                      |                                                        |         |

|    |                       |                      |                                                                                                                                                 |               |
|----|-----------------------|----------------------|-------------------------------------------------------------------------------------------------------------------------------------------------|---------------|
| 1  | Data access           | <a href="#">#29</a>  | Statement of who will have access to the final trial dataset, and disclosure of contractual agreements that limit such access for investigators | n/a           |
| 2  |                       |                      |                                                                                                                                                 |               |
| 3  |                       |                      |                                                                                                                                                 |               |
| 4  |                       |                      |                                                                                                                                                 |               |
| 5  |                       |                      |                                                                                                                                                 |               |
| 6  | Ancillary and post    | <a href="#">#30</a>  | Provisions, if any, for ancillary and post-trial care,                                                                                          | n/a           |
| 7  | trial care            |                      | and for compensation to those who suffer harm from trial participation                                                                          |               |
| 8  |                       |                      |                                                                                                                                                 |               |
| 9  |                       |                      |                                                                                                                                                 |               |
| 10 |                       |                      |                                                                                                                                                 |               |
| 11 |                       |                      |                                                                                                                                                 |               |
| 12 | Dissemination policy: | <a href="#">#31a</a> | Plans for investigators and sponsor to                                                                                                          | 17            |
| 13 | trial results         |                      | communicate trial results to participants,                                                                                                      |               |
| 14 |                       |                      | healthcare professionals, the public, and other                                                                                                 |               |
| 15 |                       |                      | relevant groups (eg, via publication, reporting in                                                                                              |               |
| 16 |                       |                      | results databases, or other data sharing                                                                                                        |               |
| 17 |                       |                      | arrangements), including any publication                                                                                                        |               |
| 18 |                       |                      | restrictions                                                                                                                                    |               |
| 19 |                       |                      |                                                                                                                                                 |               |
| 20 |                       |                      |                                                                                                                                                 |               |
| 21 |                       |                      |                                                                                                                                                 |               |
| 22 |                       |                      |                                                                                                                                                 |               |
| 23 |                       |                      |                                                                                                                                                 |               |
| 24 | Dissemination policy: | <a href="#">#31b</a> | Authorship eligibility guidelines and any intended                                                                                              | n/a           |
| 25 | authorship            |                      | use of professional writers                                                                                                                     |               |
| 26 |                       |                      |                                                                                                                                                 |               |
| 27 |                       |                      |                                                                                                                                                 |               |
| 28 | Dissemination policy: | <a href="#">#31c</a> | Plans, if any, for granting public access to the full                                                                                           | 17            |
| 29 | reproducible          |                      | protocol, participant-level dataset, and statistical                                                                                            |               |
| 30 | research              |                      | code                                                                                                                                            |               |
| 31 |                       |                      |                                                                                                                                                 |               |
| 32 |                       |                      |                                                                                                                                                 |               |
| 33 | <b>Appendices</b>     |                      |                                                                                                                                                 |               |
| 34 |                       |                      |                                                                                                                                                 |               |
| 35 |                       |                      |                                                                                                                                                 |               |
| 36 | Informed consent      | <a href="#">#32</a>  | Model consent form and other related                                                                                                            | Available on  |
| 37 | materials             |                      | documentation given to participants and authorised                                                                                              | supplementary |
| 38 |                       |                      | surrogates                                                                                                                                      | file          |
| 39 |                       |                      |                                                                                                                                                 |               |
| 40 |                       |                      |                                                                                                                                                 |               |
| 41 | Biological specimens  | <a href="#">#33</a>  | Plans for collection, laboratory evaluation, and                                                                                                | n/a           |
| 42 |                       |                      | storage of biological specimens for genetic or                                                                                                  |               |
| 43 |                       |                      | molecular analysis in the current trial and for future                                                                                          |               |
| 44 |                       |                      | use in ancillary studies, if applicable                                                                                                         |               |
| 45 |                       |                      |                                                                                                                                                 |               |
| 46 |                       |                      |                                                                                                                                                 |               |
| 47 |                       |                      |                                                                                                                                                 |               |

None The SPIRIT checklist is distributed under the terms of the Creative Commons Attribution License CC-BY-ND 3.0. This checklist can be completed online using <https://www.goodreports.org/>, a tool made by the [EQUATOR Network](#) in collaboration with [Penelope.ai](#)
