# Supplementary material for: Medroxyprogesterone acetate plus metformin for fertility-sparing treatment of atypical endometrial hyperplasia and endometrial carcinoma: trial protocol for a prospective, randomised, open, blinded-endpoint design, dose-response trial (FELICIA trial)
Source: PubMed Central journal article supplement — BMJ Open. 2020 Feb 28;10(2):e035416. doi: 10.1136/bmjopen-2019-035416 (PMC7050341; doi:10.1136/bmjopen-2019-035416), 2020-02-28
Supplement: bmjopen-2019-035416supp002.pdf [file bmjopen-2019-035416supp002.pdf]

【千葉大学医学部附属病院】治験実施計画書番号：Chiba-Met003 1.0版（2019年5月24日）  
説明文書・同意書 1.0版（2019年5月24日）

よくお読みください

被験者用

## 患者さんへ

# 子宮内膜異型増殖症・子宮体癌に対する メドロキシプロゲステロンとメトホルミンの 併用妊孕性温存療法の用量反応性試験 FELICIA Trial

### ～説明および同意文書～

この冊子には、「メトホルミン」という薬の、効果や安全性を確かめるための臨床試験（<sup>ちけん</sup>治験）についての詳しい説明が書かれています。

この冊子をよくお読みになり、この治験の目的や方法、お薬について十分に理解されたうえで、治験に参加されるか否かを決めてください。担当医師の説明やこの説明文書の中で、わからないことや心配なことなどがありましたら、どんなことでも遠慮なくお尋ねください。

【千葉大学医学部附属病院】治験実施計画書番号：Chiba-Met003 1.0版（2019年5月24日）  
説明文書・同意書 1.0版（2019年5月24日）

## 目次

|                                                         |    |
|---------------------------------------------------------|----|
| 1. <sup>ちけん</sup> 治験とは？.....                            | 3  |
| 2. 子宮内膜異型増殖症・子宮体癌とメトホルミン(グリコラン <sup>®</sup> 錠)について .... | 4  |
| 3. 治験の目的.....                                           | 6  |
| 4. 対象となる患者さん・対象とならない患者さん .....                          | 6  |
| 5. この治験の進め方 .....                                       | 7  |
| 6. 治験に参加する予定人数 .....                                    | 15 |
| 7. 治験の利益・不利益 .....                                      | 15 |
| 8. この治験に参加しない場合の、他の治療法 .....                            | 16 |
| 9. 治験への参加を中止する場合について .....                              | 16 |
| 10. 新たに重要な情報が得られた場合について .....                           | 17 |
| 11. 治験に関連した健康被害の治療について .....                            | 17 |
| 12. 治験に参加された場合の費用について .....                             | 18 |
| 13. カルテなどの医療記録の閲覧と秘密の保全について .....                       | 19 |
| 14. 治験に参加いただくことは自由です .....                              | 20 |
| 15. 患者さんに守っていただきたいことについて .....                          | 20 |
| 16. 知的財産権と利益相反について .....                                | 21 |
| 17. 治験を審査する委員会 .....                                    | 21 |
| 18. 治験に関する相談窓口 .....                                    | 22 |

【千葉大学医学部附属病院】治験実施計画書番号：Chiba-Met003 1.0版（2019年5月24日）  
 説明文書・同意書 1.0版（2019年5月24日）

## 1. 治験とは？

新しい医薬品が世の中に出て、多くの患者さんに使われるためには、国から承認を得ることが必要とされています。そのため、その効果と安全性を何段階にもわたって慎重に調べます。まずは試験管での実験や動物実験によって医薬品の候補の効果と安全性が確認されます。その後、健康な方や患者さんに使っていただき、効果や安全性を詳しく調べます。

このように、開発の最終段階において、人を対象に効果や安全性を確かめ、厚生労働省に「医薬品」として認めてもらうため、申請の資料を集めることを目的とした試験を「治験」、その治験で使われるお薬を「治験薬」と呼んでいます。

### 新しくすりができるまで

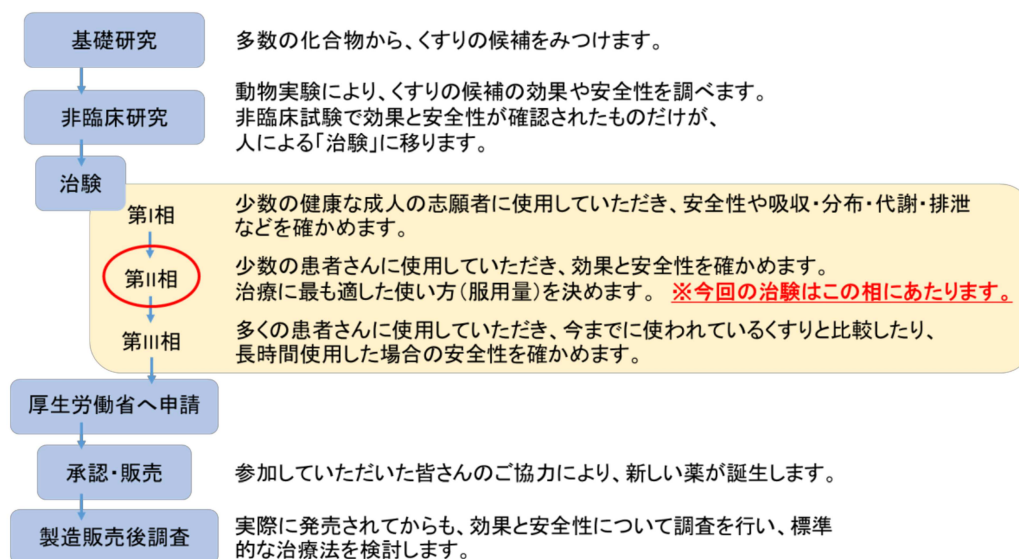

【千葉大学医学部附属病院】治験実施計画書番号：Chiba-Met003 1.0 版（2019年5月24日）  
説明文書・同意書 1.0 版（2019年5月24日）

治験は、一般の治療と異なり、研究的な側面があります。そのため、治験は参加された方の安全や人権を守るために、「医薬品、医療機器等の品質、有効性及び安全性の確保等に関する法律（略称：薬機法）」という法律と、厚生労働省が定めた「医薬品の臨床試験の実施の基準に関する省令（GCP）」に基づいて行われます。また、当院の治験審査委員会（治験について審査する委員会）で、この治験の内容に問題がないか、患者さんの人権が十分に守られているか事前に審議されたうえで、治験の実施が認められています。

## 2. 子宮内膜異型増殖症・子宮体癌とメトホルミン(グリコラン<sup>®</sup>錠)について

### ＜子宮内膜異型増殖症・子宮体癌について＞

子宮内膜異型増殖症とは、子宮内膜という組織が厚く増殖し、子宮内膜の細胞に異型が認められる疾患です。子宮体癌の前がん状態と考えられており、子宮内膜異型増殖症の4割程度は、すでに子宮体癌を合併しているといわれています。

子宮体癌は、子宮体部に発生したがんで、そのほとんどはホルモンの作用を受けて月経を起こす子宮内膜から発生するため、子宮内膜癌とも呼ばれます。

### ＜標準的な治療方法＞

子宮内膜異型増殖症は、子宮温存療法を希望される場合はメドロキシプロゲステロン（MPA）を使った治療が行われますが、子宮温存療法を希望しない場合は、手術が標準治療となっています。

子宮体癌の治療の主体は、手術療法です。しかし、子宮温存療法を希望され、高分化型の類内膜癌でがん細胞が子宮内膜にとどまっている場合に限って、MPAを使った子宮温存療法が許容されています。

【千葉大学医学部附属病院】治験実施計画書番号：Chiba-Met003 1.0版（2019年5月24日）  
説明文書・同意書 1.0版（2019年5月24日）

### ＜標準治療の問題点＞

MPA療法は、子宮の温存を希望する患者さんに対し、現時点で一般的に行われる治療法ですが、一旦がんがなくなった後に再発したり、再発を抑える期間が十分でないという報告もあります。また、わが国で行われた臨床試験の結果から22人の患者さんが参加されてMPA療法を受けられましたが、治療開始から3年後には3分の2の患者さんが再発し手術を受けられたという報告があります。多数の温存療法の成績をまとめた論文によると、ホルモン治療で子宮内膜異型増殖症では85%ほど一旦病変がなくなりますが、そのうち30%近く再発します。子宮体癌では60-80%ほど病変がなくなりますが、そのうち40%ほど再発すると報告されています。このように、子宮温存療法は現在の治療方法だけでは十分とはいえない現状があります。

### ＜治験薬について＞

この治験で使用する薬（治験薬）は「メトホルミン（商品名：グリコラン<sup>®</sup>錠）」といいます。メトホルミンは世界で50年以上前から糖尿病治療薬の第一選択薬として一般に広く使用されています。食事や運動療法後、最初に使われる薬剤で、海外では糖尿病の予防にも使われています。

近年、メトホルミンを服用している糖尿病患者さんは、服用していない人に比較してがんの発生が少ないことが報告されています。また、メトホルミンは、がん細胞を使った実験で、がんの増殖を抑える作用が報告されました。また、メトホルミンは<sup>たのうほう</sup>多嚢胞卵巣症候群（PCOS）の患者さんの不妊治療のさい、排卵誘発剤としても使用されており、排卵誘発や妊娠率の改善も期待されています。

子宮体癌の子宮温存療法では、従来のMPA療法にメトホルミンを同時に使用したところ、一旦がんが消えたあとの再発が少なくなったという報告があります。ただ、この効果はまだ十分に証明されていません。

【千葉大学医学部附属病院】治験実施計画書番号：Chiba-Met003 1.0版（2019年5月24日）  
説明文書・同意書 1.0版（2019年5月24日）

### 3. 治験の目的

この治験の目的は、子宮温存を希望する子宮内膜異型増殖症・子宮体癌の患者さんに対しMPAとメトホルミンを併用する新しい治療法において、メトホルミンの適切な用量を調べ、有効性及び安全性を確認することです。

### 4. 対象となる患者さん・対象とならない患者さん

今回の治験では、次の全ての事項に該当する患者さんにご参加をお願いしています。

- ① 子宮体癌または子宮内膜異型増殖症で、子宮温存療法の適応となる方
- ② 同意取得時の年齢が20歳以上42歳以下の方
- ③ 全身状態が良好な方
- ④ 高用量黄体ホルモンによる治療など、子宮体癌または子宮内膜異型増殖症の治療を受けたことがない方
- ⑤ 登録前の検査値が基準値範囲である方
- ⑥ 治験で使用する薬剤（MPA、メトホルミン）に対してアレルギー反応がない方
- ⑦ 治験参加について、ご本人より文書で同意が得られている方

一方、次のいずれかの事項に該当する患者さんにはご参加いただけません。

- ① 治験で使用する薬剤（MPA、メトホルミン）が使用できない方
  - ・乳酸アシドーシスを起こしやすい方
  - ・重症ケトーシス、糖尿病性昏睡または前昏睡、I型糖尿病の方
  - ・重症感染症、手術前後、重篤な外傷のある方
  - ・栄養不良状態、飢餓状態、衰弱状態、脳下垂体機能不全または副腎機能不全の方
  - ・妊婦または妊娠している可能性のある女性
  - ・本治療薬剤に過敏症の経験がある方
  - ・これまで血栓ができたことがある方

【千葉大学医学部附属病院】治験実施計画書番号：Chiba-Met003 1.0版（2019年5月24日）  
説明文書・同意書 1.0版（2019年5月24日）

- 診断未確定の性器出血、尿路出血、乳房病変のある方
  - 重篤な肝障害のある方
  - 高カルシウム血症と診断されている方
- ② 精神病または精神症状を有する方
  - ③ コントロール不良の糖尿病の方
  - ④ メトホルミンを服用している糖尿病の方（食事・運動療法、メトホルミン以外の内服薬の服用は可）
  - ⑤ 活動性の重複癌を有する方
  - ⑥ ステロイド剤の継続的な全身投与(内服または静脈内)をうけている方
  - ⑦ その他、主治医が不適格と判断した方

治験の参加に同意をいただいた後、詳しい検査を行い、治験にご参加いただけるかを判断させていただきます。

そのため、同意をいただいた後でも治験に参加していただけなくなる場合や、治験が始まった後でも医師の判断により治験を中止させていただく場合がありますので、ご了承ください。

## 5. この治験の進め方

この治験は、MPA とメトホルミンを併用するⅠ期と、メトホルミンのみを服用するⅡ期に分けられます。

治験に登録された 120 名の患者さんを以下の3つの群にランダムに割り当て、治験を開始します。どの群になるかは、事前には分かりません。

- A 群：MPA 単独群（40 名） ※この群では、メトホルミンを服用しません。
- B 群：MPA+メトホルミン 750mg 投与群（40 名）
- C 群：MPA+メトホルミン 1500mg 投与群（40 名）



【千葉大学医学部附属病院】治験実施計画書番号：Chiba-Met003 1.0版（2019年5月24日）  
 説明文書・同意書 1.0版（2019年5月24日）

第Ⅰ期では、4週間ごとに来院していただき、定められた検査・診察を受けていただきます。8週間ごとに子宮内膜組織診を行い、病変の消失を観察します。32週目に行う検査で病変が消失した場合は、寛解と判断され、第Ⅱ期に移行します。（36週の来院時に検査結果をお伝えします。）この検査で寛解していないと判断された場合は、治験を中止していただきます。

第Ⅱ期は、36週目から始まります。第Ⅰ期と同じように、処方された薬を持ち帰り、忘れないように服用を続けてください。第Ⅱ期では、第Ⅰ期で処方されていたMPAは服薬しませんが、必要に応じて月経コントロール薬を服用していただきます。妊娠を希望する場合は月経コントロールを行いませんので、担当医にお伝えください。妊娠された場合は出産するまで、妊娠を希望しない場合や流産などの場合は本治験の終了（最長5.5年）まで、あなたが治験への参加を取りやめない限り治験を継続します。

この治験の流れを以下に示します。

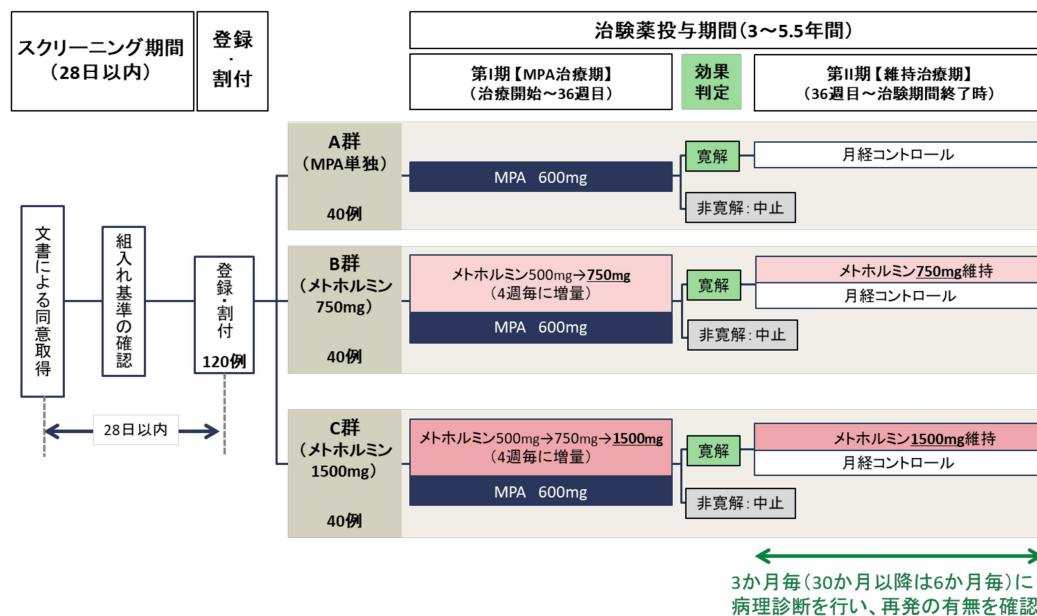



【千葉大学医学部附属病院】治験実施計画書番号：Chiba-Met003 1.0版（2019年5月24日）  
説明文書・同意書 1.0版（2019年5月24日）

## 各群の進め方

### 【A群：MPA単独群（メトホルミン非投与群）】

➤ 第Ⅰ期 治療開始から36週まで

A群に割り当てられた方は、MPAを、処方された翌日の朝から服用していただきます。

MPAの用量は1日に200mg×3回、合計600mgです。

4週ごとに来院していただきますが、来院時に処方される薬を持ち帰り、忘れないように服用を続けてください。もし飲み忘れてしまった場合は、お渡しする「服薬日誌」に記載してください。

32週目の検査で、病変が消失したかどうかを確認します。36週来院時に結果をお伝えします。この時点で消失が認められれば「寛解」と判定し、寛解した患者さんは第Ⅱ期の治療に移行していただきます。

➤ 第Ⅱ期 36週以降、最長5.5年まで

妊娠を希望されない場合は、必要に応じ、無排卵・月経不順を改善するためにピルなどのホルモン剤を服用し月経コントロールを行います。妊娠を希望される患者さんは月経コントロールを行いませんので、担当医にお伝えください。

### 【B群：MPA+メトホルミン750mg群】

➤ 第Ⅰ期 治療開始から36週まで

MPAとメトホルミンを、処方された翌日の朝から服用していただきます。

MPAを1日に200mg×3回、合計600mgを服用します。

メトホルミン（グリコラン錠250mg）を、下記の表1に従い、有害事象がないか確認し、1ヶ月後に増量します。有害事象が発生した場合はお薬の服用をお休みしたり、用量段階を下げ減量して服用していただく場合がありますので、担当医の指示に従って服用してください。

4週ごとに来院していただきますが、来院時に処方される薬を持ち帰り、忘れないように服用を続けてください。もし飲み忘れてしまった場合は、お渡しする「服薬日誌」に記載してください。

【千葉大学医学部附属病院】治験実施計画書番号：Chiba-Met003 1.0版（2019年5月24日）  
 説明文書・同意書 1.0版（2019年5月24日）

32週目の検査で、病変が消失したかどうかを確認します。36週来院時に検査の結果をお伝えします。この時点で消失が認められれば「寛解」と判定し、寛解した患者さんは第Ⅱ期の治療に移行していただきます。

表1 B群のメトホルミン服用調節

| 用量調節段階 | メトホルミン投与量 | 1回服用量×回数   |
|--------|-----------|------------|
| 1段階    | 500mg     | 250mg×1日2回 |
| 2段階    | 750mg     | 250mg×1日3回 |

➤ 第Ⅱ期 36週以降、最長5.5年まで

妊娠を希望されない場合は、必要に応じ、無排卵・月経不順を改善するためにピルなどのホルモン剤を服用し月経コントロールを行います。妊娠を希望される患者さんは月経コントロールを行いませんので、担当医にお伝えください。

メトホルミンの服用は、第Ⅰ期と同じ用量で続けていただきます。B群の患者さんは最大投与量を750mgとして、治験終了あるいは、再発などで試験中止となるまで服用を継続します。妊娠を希望される場合、メトホルミンは妊娠が分かった時点で服用を中断します。妊娠の可能性があると分かたら、担当医までお知らせください。

【C群：MPA＋メトホルミン1500mg群】

➤ 第Ⅰ期 治療開始から36週まで

MPAとメトホルミンを、処方された翌日の朝から服用していただきます。

MPAを1日に200mg×3回、合計600mgを服用します。

メトホルミン（グリコラン錠250mg）を、下記の表2に従い、有害事象がないか確認しながら1ヶ月ごとに増量します。有害事象が発生した場合はお薬の服用をお休みしたり、用量段階を下げ減量して服用していただく場合があるので、担当医の指示に従って服用してください。

【千葉大学医学部附属病院】治験実施計画書番号：Chiba-Met003 1.0版（2019年5月24日）  
 説明文書・同意書 1.0版（2019年5月24日）

表2 C群のメトホルミン服用調節

| 用量調節段階 | メトホルミン投与量 | 1回服用量×回数   |
|--------|-----------|------------|
| 1段階    | 500mg     | 250mg×1日2回 |
| 2段階    | 750mg     | 250mg×1日3回 |
| 3段階    | 1500mg    | 500mg×1日3回 |

➤ 第Ⅱ期 32週以降、最長5.5年まで

妊娠を希望されない場合は、必要に応じ、無排卵・月経不順を改善するためにピルなどのホルモン剤を服用し月経コントロールを行います。妊娠を希望される患者さんは月経コントロールを行いませんので、担当医にお伝えください。

メトホルミンを第Ⅰ期と同じ用量で続けていただきます。C群の患者さんは最大投与量を1500mgとして、治験終了あるいは、再発などで試験中止となるまで服用を継続します。妊娠を希望される場合、メトホルミンは妊娠が分かった時点で服用を中断します。妊娠の可能性があると分かったら、担当医までお知らせください。

### メトホルミンを中断する場合や併用注意のお薬について

B群もしくはC群に割り当てられて、メトホルミンを服用する患者さんは次に該当する場合は一旦服用を中断して、担当医に報告してください。症状が改善したら再開していただきます。

- ① 食事を抜いたとき、食事が不規則または食事が十分に摂れていないとき
- ② 発熱を認める場合
- ③ 重症の感染症や外傷の場合
- ④ 下痢・嘔吐などの胃腸障害で脱水の危険がある場合
- ⑤ 過度のアルコール摂取をした場合
- ⑥ 激しい筋肉運動をした場合
- ⑦ ヨード造影剤を用いた検査が予定されている場合
- ⑧ 体調不良を認める場合

【千葉大学医学部附属病院】治験実施計画書番号：Chiba-Met003 1.0版（2019年5月24日）  
説明文書・同意書 1.0版（2019年5月24日）

他の診療科や医療機関などから他のお薬を処方された場合、併用に注意する場合がありますので、治験に参加していることを伝え、医師に確認してください。プリモボラン等のタンパク同化ステロイド、アスピリン等のサリチル酸剤、インデラル等のプロプラノロールβ遮断剤などは血糖下降作用を増強させることがあり注意が必要とされます。腎臓に影響する薬剤などを服用する場合も一旦メトホルミンの服用は中断していただきます。

本試験ではMPA服用中の血栓予防にアスピリンを少量併用することがあります。メトホルミンとの併用に注意するお薬ですが、少量であり問題ないと考えます。

【千葉大学医学部附属病院】治験実施計画書番号：Chiba-Met003 1.0 版（2019年5月24日）  
説明文書・同意書 1.0 版（2019年5月24日）

## 検査スケジュール

検査等のスケジュールを表 3、表 4 に示します。

表 3 治験スケジュール（第I期：MPA 治療期）

| 観察時期                  | スクリーニング登録前      | MPA治療期（0～36週）   |             |                 |     | 中止時 |
|-----------------------|-----------------|-----------------|-------------|-----------------|-----|-----|
|                       |                 | 0週              | 4、12、20、28週 | 8、16、24、32週     | 36週 |     |
| 許容範囲（日）               | -28             | +14             | -7～+14      | -7～+14          | -21 | +14 |
| 文書による同意               | ●               |                 |             |                 |     |     |
| 登録・割付                 |                 | ●               |             |                 |     |     |
| 治験薬・併用薬の処方            |                 | ● <sup>*1</sup> | ●           | ●               |     |     |
| 患者背景                  | ●               |                 |             |                 |     |     |
| 身体所見                  | ●               |                 |             | ●               |     | ●   |
| 服薬状況確認                |                 |                 | ●           | ●               | ●   | ●   |
| 子宮内膜組織診（麻酔下全面掻爬術）     | ●               |                 |             | ●               |     |     |
| 効果判定 <sup>*2</sup>    |                 |                 |             | ●               |     |     |
| 血液検査（血算、生化学）          | ● <sup>*3</sup> |                 | ●           | ● <sup>*3</sup> |     | ●   |
| 血糖検査 <sup>*3</sup>    | ●               |                 |             | ●               |     |     |
| ホルモン検査 <sup>*3</sup>  | ●               |                 |             |                 |     |     |
| HbA1c                 | ●               |                 |             | ▲ <sup>*4</sup> |     |     |
| D-ダイマー                | ●               |                 | ●           | ●               |     | ●   |
| CA-125                | ●               |                 |             |                 |     |     |
| 心電図、胸部レントゲン           | ●               |                 |             |                 |     | ▲   |
| 骨盤・胸部 CT              | ●               |                 |             |                 |     | ▲   |
| 骨盤 MRI                | ●               |                 |             |                 |     | ▲   |
| 超音波検査                 | ●               |                 |             | ●               |     |     |
| 75gOGTT <sup>*5</sup> | ●               |                 |             |                 |     |     |
| 有害事象の観察               |                 | ←—————→         |             |                 |     |     |
| 併用薬の確認                |                 | ←—————→         |             |                 |     |     |

●：必須の検査項目 ▲：必要に応じて実施する検査項目

\*1：最初に処方された日の翌日朝から、服用を開始します。

\*2：効果判定（検査結果のご説明）は、検査を行った日の次の来院時に行います。32 週の検査結果は原則として 36 週にお伝えし、第II期に移行できるかを判断します。

\*3：スクリーニング、8、16、24、32 週時は、空腹時に採血します。

\*4：スクリーニング時の HbA1c が 6.5 以上の場合、経過測定を行います。

\*5：すでに糖尿病と診断されている場合や、スクリーニングで糖尿病の基準に達する（HbA1c が 6.5 以上かつ空腹時血糖が 120 mg/dL 以上）の場合はこの検査を行いません。

【千葉大学医学部附属病院】治験実施計画書番号：Chiba-Met003 1.0版（2019年5月24日）  
 説明文書・同意書 1.0版（2019年5月24日）

表4 治験スケジュール（第Ⅱ期：維持治療期）

| 観察時期                 | 第Ⅰ期<br>36週<br>(寛解判定) | 維持治療期               |                     |      |                        |                       | 完了時 | 中止時 |
|----------------------|----------------------|---------------------|---------------------|------|------------------------|-----------------------|-----|-----|
|                      |                      | 120週まで              |                     | 120週 | 120週～治験終了まで            |                       |     |     |
|                      |                      | 12週、36週、<br>60週、・・・ | 24週、48週、<br>72週、・・・ |      | 132週、156週、<br>180週、・・・ | 144、168週、<br>192週、・・・ |     |     |
| 許容範囲（日）              | -21                  | ±28                 | ±28                 | ±28  | ±28                    | ±28                   | -84 |     |
| 治験薬・併用薬・月経コントロール薬の処方 | ●                    | ●                   | ●                   | ●    | ●                      | ●                     |     |     |
| 不妊治療状況・拳児希望の有無       |                      |                     | ●                   | ●    |                        | ●                     | ●   |     |
| 服薬状況確認               | ●                    | ●                   | ●                   | ●    | ●                      | ●                     | ●   |     |
| 身体所見                 |                      |                     | ●                   | ●    |                        | ●                     | ●   |     |
| 子宮内膜検査*1・効果判定        |                      | ●                   | ●                   | ●    |                        | ●                     | ●   | ●   |
| 血液検査（血算、生化学）         |                      |                     | ●*2                 | ●*2  |                        | ●*2                   | ●*2 | ●   |
| 空腹時血糖、インスリン*2        |                      |                     | ●                   | ●    |                        | ●                     | ●   |     |
| HbA1c*3              |                      |                     | ▲                   | ▲    |                        | ▲                     | ▲   |     |
| 心電図・胸部レントゲン*4        |                      |                     |                     |      |                        |                       |     | ▲   |
| 骨盤・胸部CT              |                      |                     |                     | ●    |                        |                       |     | ▲*4 |
| 骨盤MRI*4              |                      |                     |                     |      |                        |                       |     | ▲   |
| 有害事象の観察              | ←                    |                     |                     |      |                        |                       |     | →   |
| 併用薬の確認               | ←                    |                     |                     |      |                        |                       |     | →   |
| 転帰の判定*5              |                      |                     |                     | ●    |                        |                       | ●   | ●   |

●：必須の検査項目 ▲：必要に応じて実施する検査項目

\*1：第Ⅱ期では、外来にて簡易的な検査を行います（吸引組織診、簡易組織診、細胞診など）。外来の検査で再発が疑われる場合は、組織検査を行います。

\*2：中止時以外の来院時は、空腹時に採血します。

\*3：スクリーニング時のHbA1cが6.5以上の場合、経過測定を行います。

\*4：再発時や有害事象発生時に、必要に応じて実施します。

\*5：再発の有無を収集します。

<妊娠が判明した際の対応について>

妊娠が判明した場合は、可能な限りスケジュールに沿って来院していただき、経過観察を行います。出産された場合などは、担当の治験コーディネーターにご連絡ください。

この治験では、妊娠・出産に関連して下記の情報を収集します。

- ・妊娠を確認した日付
- ・妊娠方法（自然妊娠、不妊治療）
- ・妊娠転帰（生産、流産、死産）および転帰週数
- ・生児獲得日（分娩日）

【千葉大学医学部附属病院】治験実施計画書番号：Chiba-Met003 1.0版（2019年5月24日）  
説明文書・同意書 1.0版（2019年5月24日）

## 5. この治験の参加予定期間

この治験に同意されてから、患者さんの参加期間は登録された日によって、3年～5.5年になります。

## 6. 治験に参加する予定人数

この治験には、日本全国から120人の患者さんに参加していただく予定です。MPAのみを服用するA群、MPAに加えてメトホルミン750mgを服用するB群、MPAに加えてメトホルミン1500mgを服用するC群に、それぞれ40人ずつ割り当てられます。

## 7. 治験の利益・不利益

### 【利益】

この治験で行うMPA療法は、現在あなたの病気に対する標準療法のひとつです。今回MPAにメトホルミンというお薬を併用した治療が病気の再発を抑える効果があると期待して試験が計画されました。しかし、現時点であなたの治療のお役に立てるかどうかは証明されていません。この治験の結果から、メトホルミンの子宮体癌あるいは子宮内膜異型増殖症に対する効果が確認できれば、新たな治療法として今後使用される可能性があります。

### 【不利益】

#### • 副作用

メトホルミンの内服による副作用としては、吐き気、嘔吐、下痢などが比較的多く見られるほか、以下に示す重篤な副作用もまれに起こります。また、他の糖尿病治療薬とメトホルミンを併用した場合に低血糖が起こる可能性があります（よく効くようになるためと考えられます）。

この試験に参加される患者さんの副作用には細心の注意を払って対応いたしますが、もしいつもと異なる症状が現れた時には速やかに報告してください。症状と程度を適切に判断して、副作用を軽減できるよう最善の処置を行います。



【千葉大学医学部附属病院】治験実施計画書番号：Chiba-Met003 1.0版（2019年5月24日）  
説明文書・同意書 1.0版（2019年5月24日）

### ① 重大な副作用として報告されているもの

- ・乳酸アシドーシス（頻度不明）：吐き気、嘔吐などの胃腸症状、深く大きい呼吸、意識が薄れるなどが現れることがあります。
- ・低血糖（頻度不明）：脱力感、強い空腹感、冷や汗、動悸、手足のふるえ、意識が薄れるなどが現れることがあります。
- ・肝機能障害、黄疸（頻度不明）：皮膚が黄色くなる、嘔吐、白目が黄色くなる、尿の色が濃くなる、吐き気、食欲不振、かゆみ、からだのだるい症状が現れることがあります。
- ・横紋筋融解症（頻度不明）：脱力感、手のしびれ、手足のこわばり、足のしびれ、筋肉の痛み、尿が赤褐色の症状が現れることがあります。

### ② その他の副作用

- 頻度 5%以上：下痢
- 0.1～5%未満：食欲不振、腹痛、悪心、嘔吐、腹部膨満感、便秘、発疹等、全身倦怠感、頭痛、頭重
- 0.1%未満：消化不良等、眠気
- 頻度不明：胃炎、胃腸障害、放屁増加、貧血、白血球減少、血小板減少、白血球増加、好酸球増加、そう痒、肝機能異常、BUN上昇、クレアチニン上昇、CK上昇、ケトーシス、乳酸上昇、血中カリウム上昇、血中尿酸増加、筋肉痛、めまい・ふらつき、味覚異常、浮腫、動悸、発汗、脱力感、空腹感、ビタミンB12減少

## 8. この治験に参加しない場合の、他の治療法

もしあなたがこの治験に参加されない場合でも、MPA療法を通常の診療で受けることができます。子宮温存可能な治療法はMPA療法しかなく、他の選択肢となる治療法としては、子宮を摘出する手術療法があります。担当医師から詳しい説明を受けてください。

## 9. 治験への参加を中止する場合について

あなたがこの治験への参加への取り止めを希望された場合だけでなく、以下に示した項目に該当した場合は、この治験の途中で参加を中止していただく場合がありますのでご了承ください。その場合はすぐに中止の理由を説明いたします。

【千葉大学医学部附属病院】治験実施計画書番号：Chiba-Met003 1.0版（2019年5月24日）  
説明文書・同意書 1.0版（2019年5月24日）

- ① MPA療法の効果が見られず、病態の進行が認められた場合
- ② I期の32週目の検査で、病変が消失していなかった場合
- ③ 病変が消失した後に、子宮内膜異型増殖症、子宮内膜癌が再発した場合
- ④ 有害事象により計画書の治療が継続できない場合
- ⑤ 服用できない期間が計画書で定める休薬期間を超えてしまった場合
- ⑥ ステロイドの長期投与により、全身に影響があると医師が判断した場合
- ⑦ 合併症の悪化により病態が急激に悪くなった場合
- ⑧ 患者さん本人または家族から試験中止の申し出があった場合
- ⑨ 試験参加中に守っていただきたいことを守っていただけない場合
- ⑩ その他、試験担当医師が本試験の継続を不可能と判断した場合

中止時には安全性の確認のために検査を行います。また、副作用により試験を中止した場合もその副作用がなくなるまで身体状態を検査することがありますので、ご協力をお願いいたします。

なお、途中で試験を中止した場合でもそれまでの記録は今後の研究に役立つ貴重なデータとして使用させていただきます。

## 10. 新たに重要な情報が得られた場合について

この治験についてお聞きになりたいことがあれば、担当医師に遠慮なくおたずねください。この治験に関する新しい重大な情報（治験の危険性・安全性など）が得られた場合には、速やかにその内容をあなたに伝えます。その場合、このまま治験への参加を続けるかどうか、もう一度あなたの自由な意思で決めていただきます。

### 11. 治験に関連した健康被害の治療について

この治験は、科学的に計画され慎重に行われます。もし、この治験に参加した後何か変わった症状にお気づきの場合は、すぐに担当医師または治験コーディネーターにお知らせください。その時点で最善と思われる処置を行い、適切に対処した上で補償が受けられます。ただし、治験を担当する医師の指示に従わず、その損害があなた自身の過失や故意によるものである場合には、補償が受けられないこともあります。補償について詳しく説明を受けたい場合は、治験を担当する医師あるいは

【千葉大学医学部附属病院】治験実施計画書番号：Chiba-Met003 1.0版（2019年5月24日）  
説明文書・同意書 1.0版（2019年5月24日）

は治験の相談窓口にお問い合わせ下さい。補償について詳しい内容をご希望の方は資料をお渡しします。

## 1 2. 治験に参加された場合の費用について

### 1) 治験期間中の医療費について

この治験で行う MPA 療法は、通常の診療として承認されている治療法ですので、それに係る薬剤費や、診療費や検査費用などの治療費はあなたご自身が加入されている健康保険に基づいて賄われ、あなたには通常の診療どおり自己負担分をお支払いいただきます。あなたが B 群（メトホルミン 750mg 群）もしくは C 群（メトホルミン 1500mg 群）に割り当てられた場合、メトホルミンのお薬代は研究費により支払われます。

### 2) 治験中の費用の負担軽減について

治験に参加していただけることになった場合、治験のための診察や検査のために、来院する回数が通常の診療より増え、それに伴い交通費などの負担が増えることがあります。この負担を軽くするため、この治験の検査スケジュールで決められた日の来院 1 回につき 7,000 円をお支払いします。治験のための検査、診察を受けるために来院される回数に、7,000 円を乗じた金額を月ごとにまとめて、あなたの口座に振り込みます。また、治験のために入院される場合は、入退院を合わせて 1 回と数え、1 回あたり 7,000 円をお支払いします。お支払いは、病院からあなたの指定する銀行または信用金庫の口座に振り込ませていただきます。

また、かかりつけの病院や他の医療機関で治療を受けた場合に、他院の担当医師へ電話や手紙で連絡をとり、医療情報の提供を求める場合があります。その際に他院からあなたの情報を提供していただくにあたって、情報提供料としてあなたの費用負担が増える場合があります。その際は、あなたに給付される負担軽減費の中からお支払いいただくようお願い致します。

【千葉大学医学部附属病院】治験実施計画書番号：Chiba-Met003 1.0版（2019年5月24日）  
説明文書・同意書 1.0版（2019年5月24日）

### 1 3. カルテなどの医療記録の閲覧と秘密の保全について

治験にご協力いただいた個人が特定されるような情報は厳重に保護され、外部に漏れることはありません。患者さんから得られたデータがコード番号などで匿名化され、報告書等でその患者さんのものであると特定されないような取扱いをいたします。

この治験の結果は、国（厚生労働省）からメトホルミンを子宮内膜異型増殖症/子宮体癌の治療薬として認めてもらうために、厚生労働省に提出されます。また、この治験薬の効果や安全性についてより詳細に検討するために、治験のデータとして使用された検査・調査等の治験薬の評価に必要なデータを国内外の機関へ提出することがあります。さらに、この治験から得られた情報は、各地の病院から集められた記録をまとめて、学会や医学雑誌等に公表されることもあります。しかし、いずれの場合も、あなたのお名前などが用いられることはなく、あなたの個人情報（氏名、住所、電話番号等）は秘密事項として保護され、外部に漏れることはありません。

また、治験がきちんと行われているかどうかを調べるために、治験薬の開発支援機関の担当者、この病院の治験審査委員会および厚生労働省など規制当局の職員が、カルテなどのあなたの医療に関する記録を閲覧することがあります（他科の診療記録や治験参加以前の期間も含まれます）。このような場合でもこれらの関係者には秘密を守る義務が課せられており、患者さんのプライバシーは守られます。

さらに、他の医療機関で治療を受けた場合も、他院の担当医師へ電話や手紙で連絡をとり、医療情報の提供を求める場合があります。あなたがこの説明文書の最後にある同意文書に署名することにより、記録を閲覧することおよび他の医療機関からの情報収集に関しても承諾していただいたことになります。

あなたは、診療情報の利用についていつでも承諾を取り消すことができますが、その後はこの治験に参加いただけなくなりますのでご了承ください。承諾を取り消したい場合は担当医師又は病院の治験コーディネーターにお伝えください。なお、

【千葉大学医学部附属病院】治験実施計画書番号：Chiba-Met003 1.0版（2019年5月24日）  
説明文書・同意書 1.0版（2019年5月24日）

承諾を取り消すまでに収集された治験データは、上記と同様に利用されますが、承諾を取り消された後は、この治験が正しく行われたかどうかを確認するような場合を除いて、あなたの診療情報が利用されることはありません。

#### 14. 治験に参加いただくことは自由です

この治験に参加するか否かの決定は、あなた自身の意思に委ねられます。ご家族の方と相談してから決めて頂くことも出来ます。また、治験に参加している途中でも、いつでも自由にやめることができます。もし参加していただかなくても、あなたが今後の治療を受ける上で不利な扱いを受けることは決してありません。

#### 15. 患者さんに守っていただきたいことについて

この治験への参加に同意していただいた場合は、次の事項をお守りください。

- 1) 治験参加期間中は、治験のスケジュールに従ってください。
- 2) 現在、他の診療科や病院で治療を受けていたり、くすりを飲まれていたりする場合は、担当医師または治験コーディネーターにその状況を詳しくお話下さい。その治療を行っている医師に、あなたがこの治験に参加されていることをお伝えさせていただきます。  
また、市販のくすりを飲む場合も、前もって担当医師または治験コーディネーターにご相談ください。
- 3) 治験中に行われる検査は、あなたの症状の変化や副作用を知るうえで大変重要なものになりますので、担当医師及び治験コーディネーターの指示に従って受けてください。
- 4) 治験薬を使用している間に、体調の変化など何か変わったことがあった場合は、担当医師あるいは治験コーディネーターにお知らせください。
- 5) その他にも、治験を担当する医師からの注意事項や指示にしたがってください。

【千葉大学医学部附属病院】治験実施計画書番号：Chiba-Met003 1.0版（2019年5月24日）  
説明文書・同意書 1.0版（2019年5月24日）

## 16. 知的財産権と利益相反について

本治験の結果が特許権等の知的財産を生み出す可能性があります。その場合の知的財産権は研究機関に帰属します。

また、本治験の実施に関して、利益相反\*（起こりうる利害の衝突）は存在しないことが利益相反審査委員会で確認されています。

\*利益相反とは：たとえば製薬会社から資金提供その他を受けている場合に自己や製薬会社の利益を図り、患者さんの安全を損なったりデータの解釈をゆがめてしまう行為のことです。

## 17. 治験を審査する委員会

この治験は、以下の治験審査委員会で、科学のおよび医学的な面だけでなく、患者さんの安全や人権も含めた倫理的な面からも審査されています。治験審査委員会は、医療を専門としない委員や、当院と利害関係のない委員も含まれています。

- 1) 名称：千葉大学医学部附属病院 治験審査委員会
- 2) 設置者：千葉大学医学部附属病院 病院長
- 3) 所在地：〒260-8677 千葉県千葉市中央区亥鼻 1-8-1

治験を開始した後も、上記の内容が変更された場合、重篤な副作用の発現といった安全性情報が得られた場合など、この治験を継続して良いかを、当院の病院長からの依頼に応じて審査します。

審査の結果は当院の病院長に報告され、院長はその報告内容を基<sup>もと</sup>に当院での治験の開始、継続を決定します。

なお、治験審査委員会の手順書（審査の進め方を示した文書）、議事概要（話し合いの記録）や委員のリストなどの情報について知りたい場合は、治験事務局までお問い合わせください。これらの情報についてはホームページ上でも掲載しております。（URL：<https://www.ho.chiba-u.ac.jp/>）



【千葉大学医学部附属病院】治験実施計画書番号：Chiba-Met003 1.0版（2019年5月24日）  
説明文書・同意書 1.0版（2019年5月24日）

## 18. 治験に関する相談窓口

この治験ならびに治療の内容について、わからない言葉や、疑問、質問、もう一度聞きたいことがあるときや、更に詳しい情報を知りたい場合は、遠慮せずいつでもお尋ねください。治験が始まった後でも、わからないことがあれば、なんでもお答えいたします。また、この治験薬を使うことになにか心配がありましたら、いつでも遠慮なく担当医師または治験コーディネーターにご連絡ください。

以上、この治験の内容について十分ご理解いただいた上で、この治験への参加に同意していただける場合は、この説明文書の最後にある同意文書に同意年月日の記載と署名をお願いいたします。

この説明文書と同意文書（患者さん用）は大切に保管してください。

病院名： 千葉大学医学部附属病院  
治験責任医師：三橋 暁（職名：医師）  
あなたの担当医師：

### 相談窓口

【平日(8:30-17:00)】

- 婦人科外来  
代表：043-222-7171（内線 6891）
- 臨床試験部 治験コーディネーター室  
代表：043-222-7171（内線 6462）  
直通：043-226-2630

【夜間および休日】

代表：043-222-7171

※婦人科で治験に参加している旨を必ずお伝えください。



【千葉大学医学部附属病院】治験実施計画書番号：Chiba-Met003 1.0版（2019年5月24日）  
説明文書・同意書 1.0版（2019年5月24日）

医師用

## 同意文書

私は、「子宮内膜異型増殖症・子宮体癌に対するメドロキシプロゲステロンとメトホルミンの併用妊孕性温存療法の用量反応性試験」に参加するにあたり、以下の内容について説明を受け、十分に理解した上で、自らの自由意思により本治験に参加することに同意します。

同意日：20 年 月 日

患者さんの名前（署名）： \_\_\_\_\_

◇ 治験に関する負担軽減費の支払いを受けることに

同意します

同意しません（負担軽減費はいただきません）

（どちらかの口にチェックしてください）

治験責任医師（治験分担医師）

署名： \_\_\_\_\_

説明日：20 年 月 日

補足説明者

署名： \_\_\_\_\_

説明日：20 年 月 日

【千葉大学医学部附属病院】治験実施計画書番号：Chiba-Met003 1.0版（2019年5月24日）  
説明文書・同意書 1.0版（2019年5月24日）

病院用

## 同意文書

私は、「子宮内膜異型増殖症・子宮体癌に対するメドロキシプロゲステロンとメトホルミンの併用妊孕性温存療法の用量反応性試験」に参加するにあたり、以下の内容について説明を受け、十分に理解した上で、自らの自由意思により本治験に参加することに同意します。

同意日：20 年 月 日

患者さんの名前（署名）： \_\_\_\_\_

◇ 治験に関する負担軽減費の支払いを受けることに

同意します

同意しません（負担軽減費はいただきません）

（どちらかの口にチェックしてください）

治験責任医師（治験分担医師）

署名： \_\_\_\_\_

説明日：20 年 月 日

補足説明者

署名： \_\_\_\_\_

説明日：20 年 月 日

【千葉大学医学部附属病院】治験実施計画書番号：Chiba-Met003 1.0版（2019年5月24日）  
説明文書・同意書 1.0版（2019年5月24日）

**患者さん用**

## 同意文書

私は、「子宮内膜異型増殖症・子宮体癌に対するメドロキシプロゲステロンとメトホルミンの併用妊孕性温存療法の用量反応性試験」に参加するにあたり、以下の内容について説明を受け、十分に理解した上で、自らの自由意思により本治験に参加することに同意します。

同意日：20 年 月 日

患者さんの名前（署名）： \_\_\_\_\_

◇ 治験に関する負担軽減費の支払いを受けることに

同意します

同意しません（負担軽減費はいただきません）

（どちらかの口にチェックしてください）

治験責任医師（治験分担医師）

署名： \_\_\_\_\_

説明日： 20 年 月 日

補足説明者

署名： \_\_\_\_\_

説明日： 20 年 月 日
