# Supplementary material for: Medroxyprogesterone acetate plus metformin for fertility-sparing treatment of atypical endometrial hyperplasia and endometrial carcinoma: trial protocol for a prospective, randomised, open, blinded-endpoint design, dose-response trial (FELICIA trial)
Source: PubMed Central journal article supplement — BMJ Open. 2020 Feb 28;10(2):e035416. doi: 10.1136/bmjopen-2019-035416 (PMC7050341; doi:10.1136/bmjopen-2019-035416), 2020-02-28
Supplement: bmjopen-2019-035416supp003.pdf [file bmjopen-2019-035416supp003.pdf]

**A list of recruiting sites (from north to south)**

Hokkaido University Hospital

Tohoku University Hospital

University of Tsukuba Hospital

Jichi Medical University Hospital

The Jikei University Hospital

Chiba University Hospital

Keio University Hospital

Tokai University Hospital

Kitasato University Hospital

Niigata University Medical & Dental Hospital

Shinshu University Hospital

Osaka Medical College Hospital

Gifu University Hospital

Kurume University Hospital

Kumamoto University Hospital
