# Supplementary material for: Medroxyprogesterone acetate plus metformin for fertility-sparing treatment of atypical endometrial hyperplasia and endometrial carcinoma: trial protocol for a prospective, randomised, open, blinded-endpoint design, dose-response trial (FELICIA trial)
Source: PubMed Central journal article supplement — BMJ Open. 2020 Feb 28;10(2):e035416. doi: 10.1136/bmjopen-2019-035416 (PMC7050341; doi:10.1136/bmjopen-2019-035416), 2020-02-28
Supplement: bmjopen-2019-035416supp004.pdf [file bmjopen-2019-035416supp004.pdf]

**The names of Ethics Committee/s (from north to south)**

Institutional review board, Hokkaido University Hospital

Institutional review board, Tohoku University Hospital

Institutional review board, University of Tsukuba Hospital

Institutional review board, Jichi Medical University Hospital

Institutional review board, The Jikei University Hospital

Institutional review board, Chiba University Hospital

Institutional review board, Keio University Hospital

Institutional review board, Tokai University Hospital

Institutional review board, Kitasato University Hospital

Institutional review board, Niigata University Medical & Dental Hospital

Institutional review board, Shinshu University Hospital

Institutional review board, Osaka Medical College Hospital

Institutional review board, Gifu University Hospital

Institutional review board, Kurume University Hospital

Institutional review board, Kumamoto University Hospital
